# Supplementary material for: Unveiling the mechanisms and secrets of chemoselectivities in Au(i)-catalyzed diazo-based couplings with aryl unsaturated aliphatic alcohols
Source: Royal Society of Chemistry journal article supplement (doi:10.1039/c8cy01352g), 2018-01-01
Supplement: c8cy01352g1.pdf [file c8cy01352g1.pdf]

## Supporting Information

### **Unveiling the Mechanisms and Secrets of Chemoselectivities in Au(I)-Catalyzed Diazo-Based Couplings with Aryl Unsaturated Aliphatic Alcohols**

Guojing Pei,<sup>1</sup> Yuxia Liu,<sup>1,\*</sup> Guang Chen,<sup>1,2</sup> Xiangai Yuan,<sup>1</sup> Yuan-Ye Jiang,<sup>1</sup> and Siwei

Bi<sup>1,\*</sup>

---

<sup>1</sup> College of Chemistry and Chemical Engineering, Qufu Normal University, Qufu 273165, P. R. China.  
E-mail: liuyuxia2008@163.com, siweibi@126.com Fax: +86-537-4456305; Tel: +86-537-4458308

<sup>2</sup> Institute of Functional Materials and Molecular Imaging, College of Emergency and Trauma, Hainan Medical University, Haikou, 571199, China

**Table S1** Calculated free energy barriers (kcal mol<sup>-1</sup>) in solvent using M06, M06-2X, M06-L, B3PW91, BP86 and B97D functionals for several steps involved in Figures 3 and 8.

|                                                               | M06  | M06-2X | M06-L | B3PW91 | BP86 | B97D |
|---------------------------------------------------------------|------|--------|-------|--------|------|------|
| <b>2a</b> → <b>TS</b> <sub>2a-11</sub> (in DCE)               | 17.4 | 16.4   | 17.6  | 12.8   | 12.4 | 18.2 |
| <b>21</b> → <b>TS</b> <sub>23-24</sub> (in Et <sub>2</sub> O) | 12.2 | 12.8   | 13.2  | 9.7    | 8.8  | 16.3 |

**Table S2** Calculated barriers (kcal mol<sup>-1</sup>) for several selected key steps in the absence and presence of counterions.

|                                     | <b>1a→TS<sub>1a-2a</sub></b> | <b>2a→TS<sub>2a-11</sub></b> | <b>2a→TS<sub>1a-14</sub></b> | <b>20→TS<sub>20-21</sub></b> | <b>20→TS<sub>20-44</sub></b> | <b>21→TS<sub>23-24</sub></b> |
|-------------------------------------|------------------------------|------------------------------|------------------------------|------------------------------|------------------------------|------------------------------|
| AuJohnPhos <sup>+</sup>             | 12.8                         | 17.4                         | 20.2                         |                              |                              |                              |
| JohnPhosAuSbF <sub>6</sub>          | 14.9                         | 5.8                          | 18.6                         |                              |                              |                              |
| AuPCy <sub>3</sub> <sup>+</sup>     |                              |                              |                              | 9.2                          | 15.0                         | 12.2                         |
| PCy <sub>3</sub> AuNTf <sub>2</sub> |                              |                              |                              | 11.4                         | 22.3                         | 18.1                         |

**Table S3** The distortion/interaction analysis of the propargyl C<sup>2</sup> and hydroxyl O atom nucleophilic attack transition states **TS**<sub>1a-2a</sub> and **TS**<sub>1a-14</sub> (The substituents on the phosphorous ligand are omitted for simplicity). The energies are given in kcal mol<sup>-1</sup>.

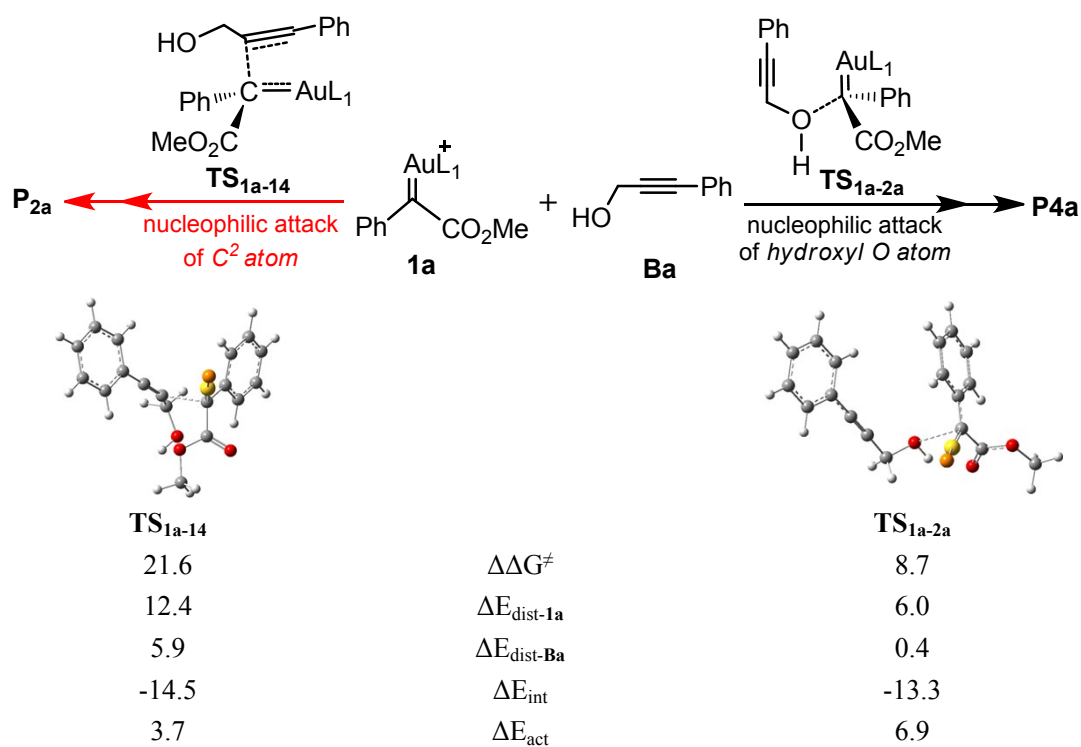

**Table S4** Comparison for the calculated energy barriers (kcal mol<sup>-1</sup>) using JohnPhos and PCy<sub>3</sub> ligands for the ring-opening and H<sub>2</sub>O-assisted [1,3]-H shift steps involved in Fig. 9.

|                                 | <b>25→TS<sub>25-26</sub></b> | <b>25→TS<sub>28-29</sub></b> |
|---------------------------------|------------------------------|------------------------------|
| AuJohnPhos <sup>+</sup>         | -1.6                         | 23.2                         |
| AuPCy <sub>3</sub> <sup>+</sup> | -1.5                         | 22.8                         |

**Table S5** Comparison for the calculated energy barriers (kcal mol<sup>-1</sup>) using **Aa** and **Ab** for several selected key steps in the **Db**-involved system.

|                                        | 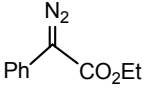<br>ethyl phenyldiazoacetate ( <b>Ab</b> ) | <br>methyl phenyldiazoacetate ( <b>Aa</b> ) |
|----------------------------------------|-----------------------------------------------------------------------------------------------------------------------------|--------------------------------------------------------------------------------------------------------------------------------|
| <b>21</b> → <b>TS</b> <sub>21-22</sub> | 11.1                                                                                                                        | 12.5                                                                                                                           |
| <b>21</b> → <b>TS</b> <sub>23-24</sub> | 12.2                                                                                                                        | 12.1                                                                                                                           |
| <b>21</b> → <b>TS</b> <sub>25-26</sub> | -1.2                                                                                                                        | -4.2                                                                                                                           |
| <b>21</b> → <b>TS</b> <sub>28-29</sub> | 23.1                                                                                                                        | 24.2                                                                                                                           |
| <b>21</b> → <b>TS</b> <sub>21-43</sub> | 19.6                                                                                                                        | 20.9                                                                                                                           |
| <b>21</b> → <b>TS</b> <sub>21-47</sub> | 44.0                                                                                                                        | 42.4                                                                                                                           |

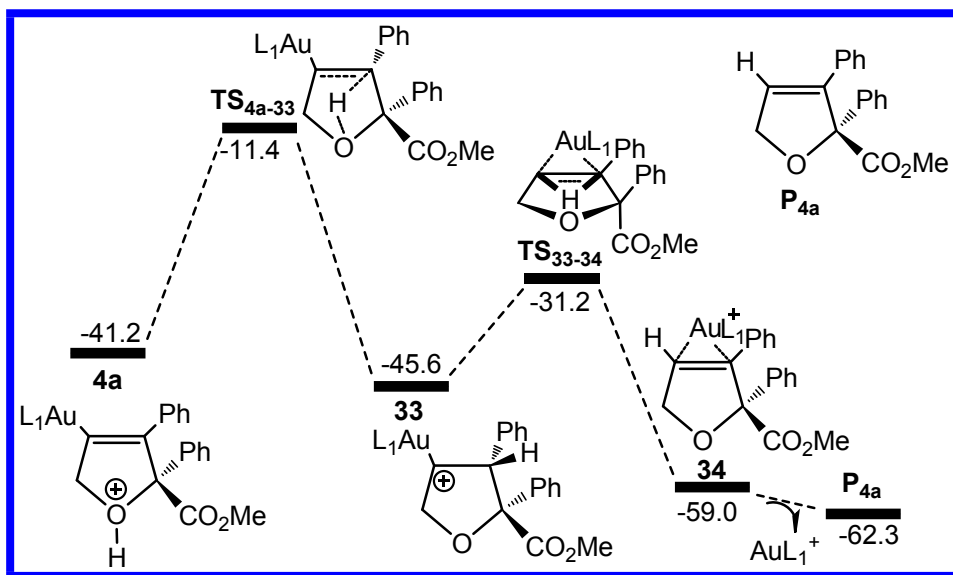

**Fig. S1** Calculated free energy profile in DCE solvent for the **4a** → **P<sub>4a</sub>** transformation via the direct [1,3]-H shift. The relative free energies are given in kcal mol<sup>-1</sup>. L<sub>1</sub> = JohnPhos

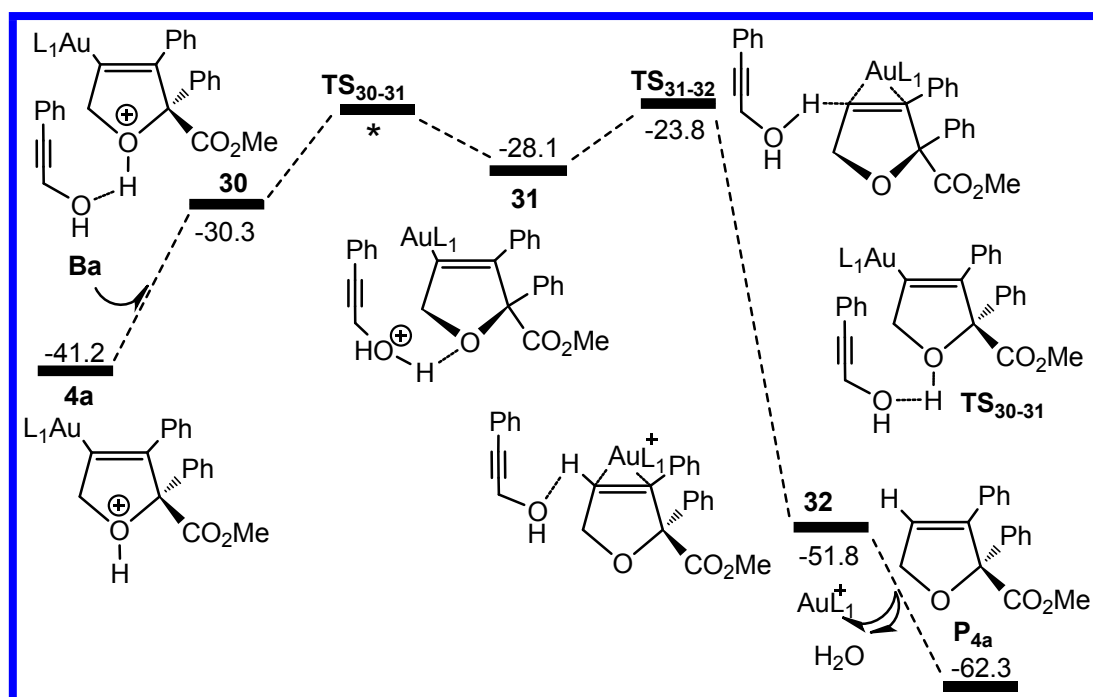

**Fig. S2** Calculated free energy profile in DCE solvent for the **4a** → **P<sub>4a</sub>** transformation via the **Ba**-assisted [1,3]-H shift. The relative free energies are given in kcal mol<sup>-1</sup>. L<sub>1</sub> = JohnPhos



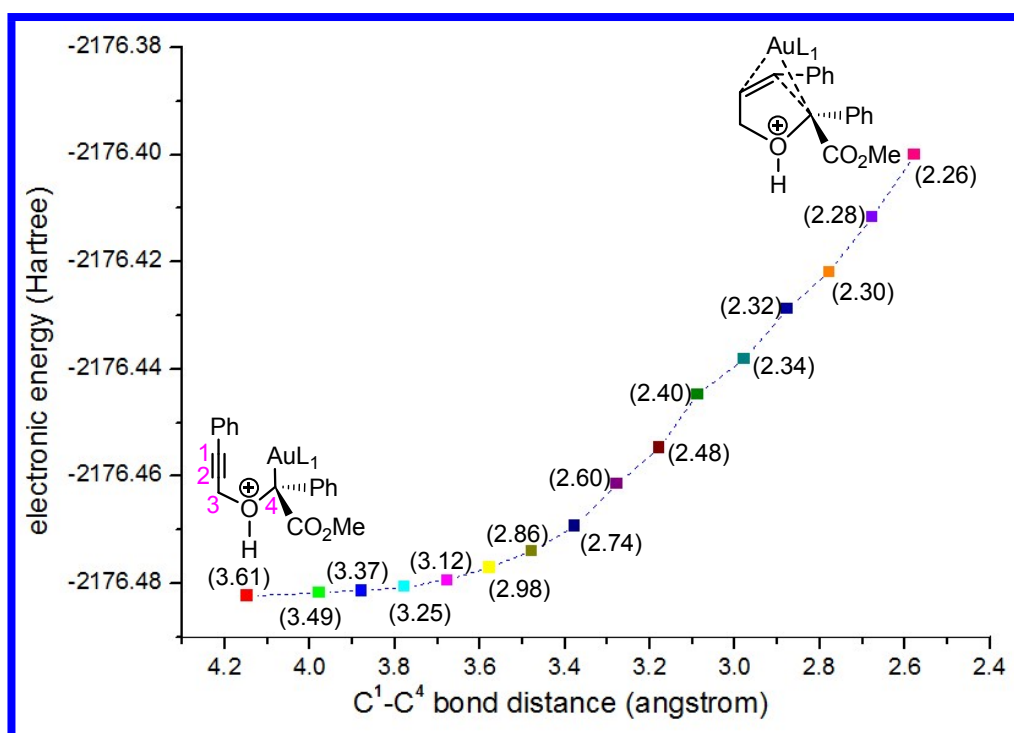

**Fig. S3** Relax energy surface scan of the C<sup>1</sup>-C<sup>4</sup> bond distances for the transition state TS<sub>2a-4a</sub> along the IRC curve. The values in parentheses are the Au-C<sup>2</sup> bond distances.

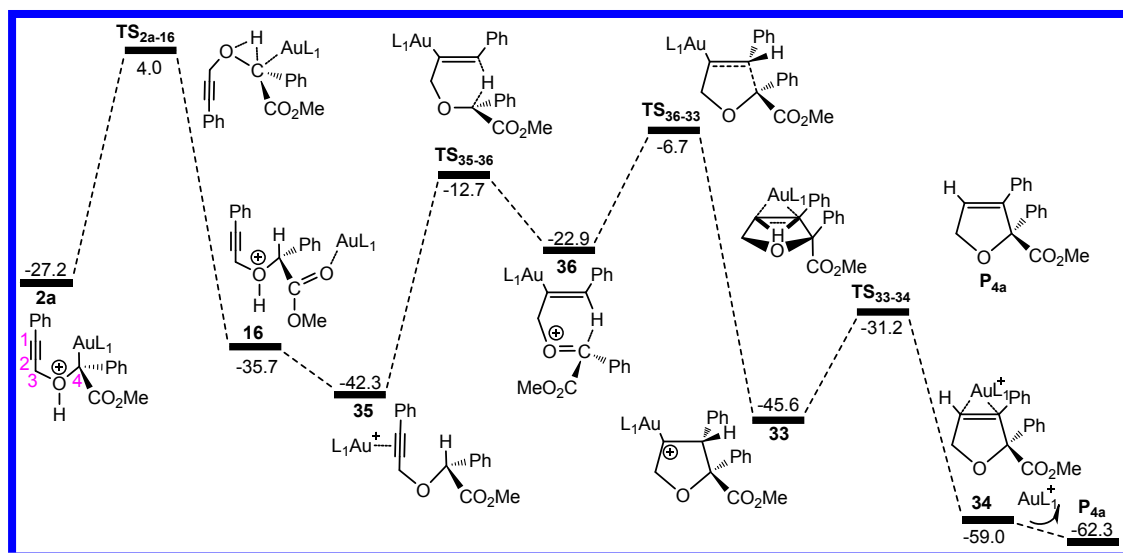

**Fig. S4** Calculated free energy profile in DCE solvent along the possible pathway for forming product **P<sub>4a</sub>** starting from **2a**. The relative free energies are given in kcal mol<sup>-1</sup>.

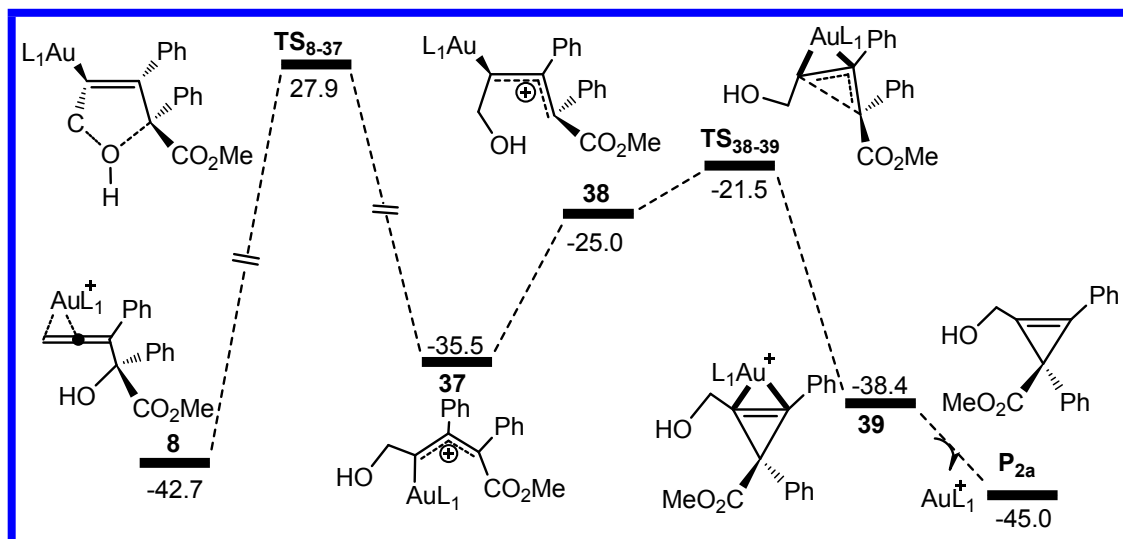

**Fig. S5** Calculated free energy profile in DCE solvent along the possible pathway for forming product **P<sub>2a</sub>** starting from **8**. The relative free energies are given in kcal mol<sup>-1</sup>.

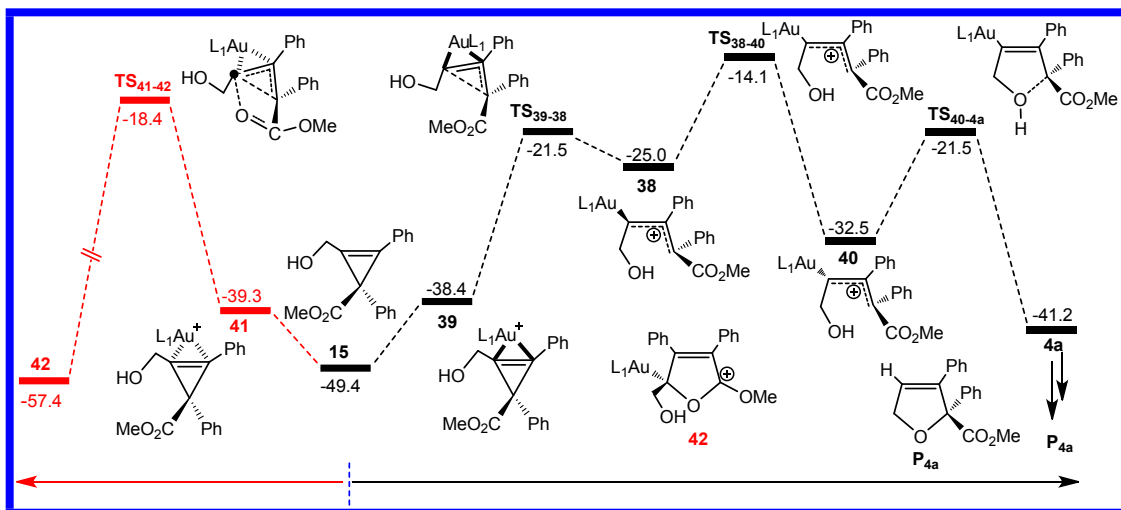

**Fig. S6** Calculated free energy profiles in DCE along two possible pathways bifurcated from **15**. The relative free energies are given in kcal mol<sup>-1</sup>.

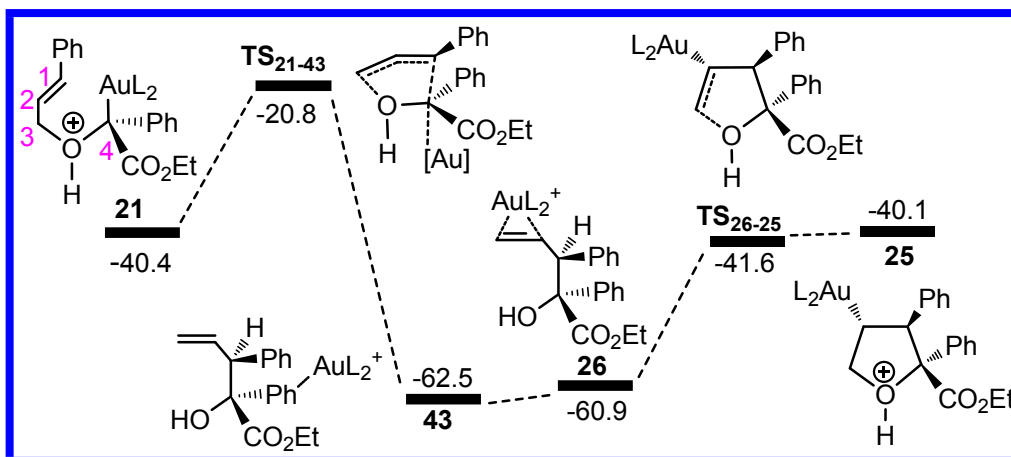

**Fig. S7** Calculated free energy profile in Et<sub>2</sub>O solvent along the possible pathway via [2,3]-σ rearrangement for step **21**→**25**. The relative free energies are given in kcal mol<sup>-1</sup>.

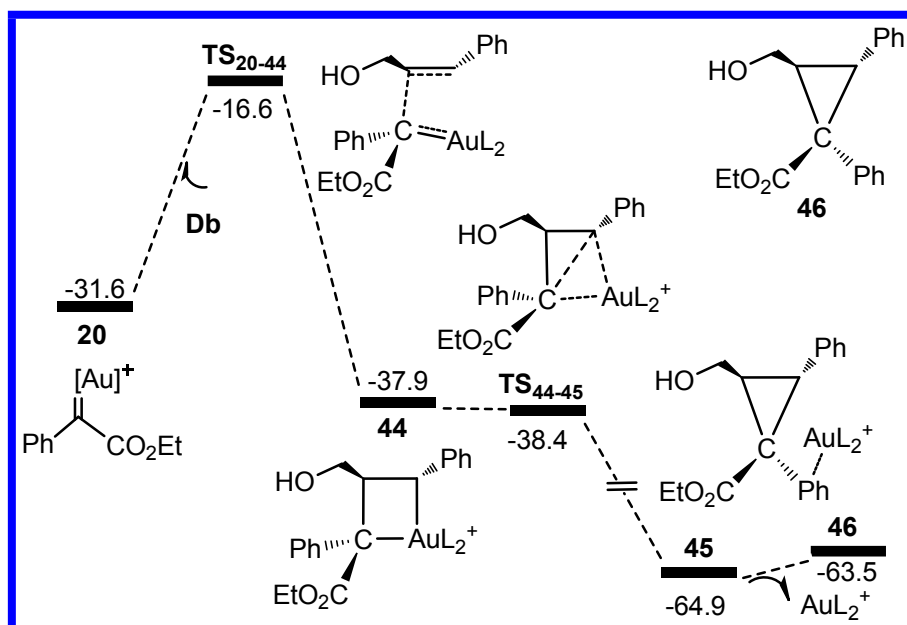

**Fig. S8** Calculated free energy profile in Et<sub>2</sub>O solvent along the possible pathway starting from **20**. The relative free energies are given in kcal mol<sup>-1</sup>.

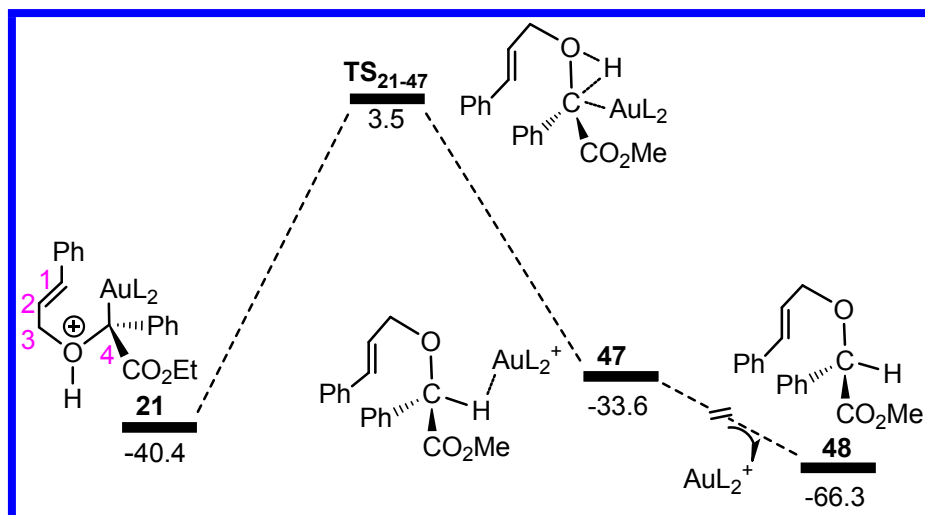

**Fig. S9** Calculated free energy profile in Et<sub>2</sub>O solvent along the possible pathway for [1,2]-H shift of intermediate **21**. The relative free energies are given in kcal mol<sup>-1</sup>.

## Cartesian coordinates for all complexes calculated in this study:

### AuL<sub>1</sub>

|   |             |             |             |
|---|-------------|-------------|-------------|
| P | -1.20021000 | -0.20307400 | 0.10940800  |
| C | -1.88716400 | -0.40238300 | 1.94150600  |
| C | -2.35325400 | -0.84366600 | -1.35438500 |
| C | -2.68902500 | -2.31578900 | -1.06814900 |
| H | -3.37192400 | -2.42872400 | -0.22228600 |
| H | -3.19011100 | -2.73393000 | -1.94804500 |
| H | -1.79340200 | -2.91573800 | -0.87947000 |
| C | -3.64722000 | -0.03166100 | -1.53162800 |
| H | -3.45236700 | 0.98253900  | -1.88459000 |
| H | -4.24943400 | -0.52860100 | -2.30058500 |
| H | -4.25580700 | 0.01506800  | -0.62643400 |
| C | -1.51113200 | -0.73280900 | -2.63669900 |
| H | -0.61781500 | -1.36426700 | -2.59489000 |
| H | -2.11809700 | -1.07197300 | -3.48351000 |
| H | -1.20617500 | 0.29810400  | -2.84007000 |
| C | -3.35348400 | 0.04085700  | 2.05917500  |
| H | -4.02939400 | -0.59264400 | 1.47958000  |
| H | -3.65376400 | -0.04326800 | 3.10974800  |
| H | -3.50033200 | 1.08317700  | 1.76651400  |
| C | -1.74205300 | -1.87678200 | 2.35232900  |
| H | -0.70296200 | -2.21481700 | 2.29165800  |
| H | -2.06676000 | -1.97886100 | 3.39383900  |
| H | -2.35810900 | -2.54735700 | 1.74975400  |
| C | -0.99296100 | 0.47415300  | 2.83292100  |
| H | 0.06312200  | 0.19826400  | 2.74924100  |
| H | -1.09646500 | 1.53748900  | 2.60381700  |
| H | -1.29169100 | 0.32472300  | 3.87623800  |
| C | -0.82067500 | 1.62956100  | -0.17203000 |
| C | 0.48557800  | 2.18535500  | -0.27177100 |
| C | -1.92626500 | 2.49654200  | -0.22840300 |
| C | 0.60750700  | 3.57326000  | -0.45572900 |
| C | -1.77778300 | 3.87024900  | -0.41219500 |
| H | -2.92785800 | 2.10188400  | -0.11924100 |
| C | -0.50163400 | 4.41133700  | -0.53685900 |
| H | 1.60461900  | 3.99528100  | -0.53519100 |
| H | -2.65646600 | 4.50588600  | -0.45385800 |
| H | -0.36518000 | 5.47776200  | -0.68538400 |
| C | 1.77377300  | 1.43367000  | -0.11793500 |
| C | 2.26374400  | 0.55613000  | -1.12038600 |
| C | 2.54030400  | 1.60591100  | 1.03983500  |
| C | 3.44970100  | -0.18100400 | -0.91010600 |
| H | 1.77636800  | 0.52672100  | -2.09121800 |
| C | 3.73091200  | 0.89122000  | 1.23685100  |

|           |             |             |             |
|-----------|-------------|-------------|-------------|
| H         | 2.19614000  | 2.29584000  | 1.80438000  |
| C         | 4.17585600  | -0.01869800 | 0.28164100  |
| H         | 3.83209400  | -0.81627000 | -1.70356900 |
| H         | 4.30396400  | 1.04806600  | 2.14531300  |
| H         | 5.09373300  | -0.57634200 | 0.43642200  |
| Au        | 0.92517500  | -1.29271700 | -0.15502700 |
| <b>Aa</b> |             |             |             |
| C         | 0.50043900  | 0.40249700  | -0.00030100 |
| C         | -0.94291300 | 0.07906000  | -0.00007500 |
| C         | -1.38617100 | -1.25623400 | -0.00048200 |
| C         | -1.90504400 | 1.10688500  | 0.00049000  |
| C         | -2.75129500 | -1.54034000 | -0.00033500 |
| H         | -0.65934900 | -2.05698200 | -0.00088500 |
| C         | -3.26514400 | 0.80998900  | 0.00062400  |
| H         | -1.59679200 | 2.14835300  | 0.00086000  |
| C         | -3.69900900 | -0.51676900 | 0.00020500  |
| H         | -3.07222500 | -2.57828300 | -0.00066700 |
| H         | -3.98653300 | 1.62209000  | 0.00106300  |
| H         | -4.75997700 | -0.74781400 | 0.00030000  |
| C         | 1.62127900  | -0.55010000 | -0.00012500 |
| O         | 1.51766000  | -1.76223900 | -0.00011500 |
| C         | 2.81561300  | 0.09477500  | 0.00021300  |
| O         | 3.97023500  | -0.75934800 | 0.00059600  |
| H         | 4.82814900  | -0.08726800 | 0.00084900  |
| H         | 3.97991100  | -1.39461800 | 0.88969700  |
| H         | 3.98046100  | -1.39464900 | -0.88847800 |
| N         | 0.84832000  | 1.67389600  | -0.00045100 |
| N         | 1.11823800  | 2.77968200  | -0.00056300 |
| <b>Ba</b> |             |             |             |
| C         | 0.84060400  | -0.00022400 | -0.22061400 |
| C         | 2.04781200  | -0.00034500 | -0.32808100 |
| C         | 3.50049400  | -0.00050300 | -0.47930100 |
| H         | 3.79678700  | -0.88603200 | -1.06624300 |
| H         | 3.79680300  | 0.88386000  | -1.06798900 |
| O         | 4.12085300  | 0.00075900  | 0.80394600  |
| H         | 5.07616200  | 0.00062700  | 0.65883800  |
| C         | -0.58340300 | -0.00009600 | -0.09685500 |
| C         | -1.29667300 | -1.21298600 | -0.03486900 |
| C         | -1.29647900 | 1.21294000  | -0.03527600 |
| C         | -2.68418800 | -1.20861600 | 0.08446600  |
| H         | -0.75002700 | -2.14945200 | -0.07994600 |
| C         | -2.68398600 | 1.20883300  | 0.08406800  |
| H         | -0.74966800 | 2.14929300  | -0.08067100 |
| C         | -3.38212400 | 0.00017100  | 0.14385400  |



|                |             |             |             |
|----------------|-------------|-------------|-------------|
| H              | -3.22264000 | -2.15081200 | 0.13186200  |
| H              | -3.22229800 | 2.15112400  | 0.13115300  |
| H              | -4.46427400 | 0.00028300  | 0.23708000  |
| N <sub>2</sub> |             |             |             |
| N              | 0.00000000  | 0.00000000  | 0.55265300  |
| N              | 0.00000000  | 0.00000000  | -0.55265300 |
| <b>Au-Ba</b>   |             |             |             |
| Au             | 1.35609500  | -0.60563700 | -0.11524800 |
| P              | -0.90291500 | 0.16252900  | -0.55971300 |
| C              | -2.06413600 | -1.09048800 | 0.28605400  |
| C              | -3.40564700 | -0.93459900 | 0.72269100  |
| C              | -1.45785400 | -2.35626700 | 0.42832200  |
| C              | -4.05612600 | -2.05633000 | 1.27341200  |
| C              | -2.13094100 | -3.45122100 | 0.96277300  |
| H              | -0.42792200 | -2.50121600 | 0.11866200  |
| C              | -3.44561300 | -3.30030400 | 1.39206200  |
| H              | -5.07953100 | -1.92863800 | 1.61162000  |
| H              | -1.62085200 | -4.40596600 | 1.04350500  |
| H              | -3.99199300 | -4.13587200 | 1.81840400  |
| C              | -0.94722900 | 2.00823200  | 0.12755100  |
| C              | -1.19255300 | -0.01030600 | -2.49721800 |
| C              | -0.98193500 | 1.89355200  | 1.65959800  |
| H              | -0.91744400 | 2.90067400  | 2.08709400  |
| H              | -1.90254700 | 1.43802700  | 2.02069000  |
| H              | -0.13265800 | 1.31585400  | 2.03970500  |
| C              | -2.12273300 | 2.83935700  | -0.40700500 |
| H              | -2.07779200 | 3.83215200  | 0.05574400  |
| H              | -2.05644500 | 2.98687200  | -1.48851100 |
| H              | -3.09325000 | 2.40833500  | -0.17146600 |
| C              | 0.37319100  | 2.69263500  | -0.27947400 |
| H              | 0.48166900  | 2.80533500  | -1.35899200 |
| H              | 0.37718400  | 3.69743600  | 0.15801500  |
| H              | 1.25013800  | 2.16167400  | 0.10320600  |
| C              | -0.31748600 | 1.01541700  | -3.23340400 |
| H              | -0.65999900 | 2.04191800  | -3.08297600 |
| H              | 0.73482000  | 0.94752700  | -2.93983000 |
| H              | -0.37325200 | 0.80926700  | -4.30827000 |
| C              | -2.66878900 | 0.17886800  | -2.86497400 |
| H              | -2.76927800 | 0.11248500  | -3.95449300 |
| H              | -3.28648800 | -0.61045200 | -2.43097400 |
| H              | -3.06419200 | 1.14734400  | -2.55248900 |
| C              | -0.75221200 | -1.43207400 | -2.88920100 |
| H              | -1.32471100 | -2.20297900 | -2.36692300 |
| H              | -0.92313800 | -1.56371700 | -3.96370900 |
| H              | 0.31261400  | -1.59929500 | -2.69751000 |
| C              | -4.25227900 | 0.30585900  | 0.71187300  |
| C              | -4.40978600 | 1.04579200  | 1.89587300  |

|          |             |             |             |
|----------|-------------|-------------|-------------|
| C        | -5.04389700 | 0.64621500  | -0.39528300 |
| C        | -5.27667100 | 2.13818500  | 1.94849800  |
| H        | -3.86286600 | 0.75042000  | 2.78673000  |
| C        | -5.91465900 | 1.73713400  | -0.34289200 |
| H        | -4.99952100 | 0.04315600  | -1.29438600 |
| C        | -6.02409500 | 2.49417800  | 0.82444800  |
| H        | -5.37864900 | 2.70008400  | 2.87207200  |
| H        | -6.51878400 | 1.98367800  | -1.21096100 |
| H        | -6.70299000 | 3.34039200  | 0.86516600  |
| C        | 3.78301700  | -0.63134400 | 0.34203600  |
| C        | 3.21645600  | -1.73389100 | 0.24824200  |
| C        | 3.15098800  | -3.22786500 | 0.21218600  |
| H        | 3.22947700  | -3.55113300 | -0.82970600 |
| H        | 4.02476200  | -3.61960100 | 0.75057200  |
| O        | 1.93832200  | -3.75955800 | 0.70691700  |
| H        | 1.92747000  | -3.66026800 | 1.66856400  |
| C        | 4.49047400  | 0.59793600  | 0.47971000  |
| C        | 4.68762900  | 1.15778600  | 1.76046400  |
| C        | 5.03040900  | 1.23570800  | -0.65786900 |
| C        | 5.41394200  | 2.33607700  | 1.89376100  |
| H        | 4.27547200  | 0.65967700  | 2.63203400  |
| C        | 5.75662200  | 2.41215800  | -0.50909300 |
| H        | 4.88133200  | 0.79695800  | -1.63913400 |
| C        | 5.94735700  | 2.96244200  | 0.76263300  |
| H        | 5.56910800  | 2.76557200  | 2.87815100  |
| H        | 6.17736400  | 2.90034600  | -1.38212500 |
| H        | 6.51584200  | 3.88073000  | 0.87279300  |
| <b>5</b> |             |             |             |
| C        | -3.26134400 | 0.49537000  | 0.50378500  |
| C        | -4.04386500 | -0.46920000 | -0.37864500 |
| C        | -4.76597300 | -0.01914200 | -1.49196700 |
| C        | -4.05828900 | -1.83520700 | -0.04948500 |
| C        | -5.48264700 | -0.93390600 | -2.26575000 |
| H        | -4.75484300 | 1.02696500  | -1.76780800 |
| C        | -4.79236000 | -2.73641700 | -0.81725800 |
| H        | -3.49566000 | -2.19847300 | 0.80687700  |
| C        | -5.50434400 | -2.28803500 | -1.93202000 |
| H        | -6.03326100 | -0.57705900 | -3.13049900 |
| H        | -4.80177900 | -3.78772400 | -0.54729000 |
| H        | -6.07067600 | -2.99010900 | -2.53558900 |
| C        | -3.17727400 | 1.97623000  | 0.15243400  |
| O        | -3.05253300 | 2.37584000  | -0.98177000 |
| O        | -3.22092300 | 2.74296300  | 1.24891800  |
| C        | -3.07681100 | 4.17063700  | 1.03271500  |
| H        | -3.18259200 | 4.61917100  | 2.01846200  |
| H        | -2.09318100 | 4.38445100  | 0.61057700  |
| H        | -3.85512100 | 4.52592500  | 0.35605600  |

|   |             |             |             |
|---|-------------|-------------|-------------|
| N | -3.63036500 | 0.33978600  | 1.83632500  |
| N | -3.90240800 | 0.16464300  | 2.90843400  |
| P | 1.24078400  | -0.59876300 | 0.12649700  |
| C | 1.33723500  | -2.32978500 | -0.82865400 |
| C | 1.93313900  | -0.58947400 | 1.97591700  |
| C | 0.93811500  | -1.39894200 | 2.82870300  |
| H | 0.89959000  | -2.45226100 | 2.53617400  |
| H | 1.27152500  | -1.36268000 | 3.87200100  |
| H | -0.07606000 | -0.98929800 | 2.78694400  |
| C | 3.33498000  | -1.18860600 | 2.16500600  |
| H | 4.08759800  | -0.72846700 | 1.53079800  |
| H | 3.63026400  | -1.01696600 | 3.20688800  |
| H | 3.34755100  | -2.26646800 | 2.00176500  |
| C | 1.91423300  | 0.88516800  | 2.41168300  |
| H | 0.92273000  | 1.33422600  | 2.29130300  |
| H | 2.18063700  | 0.94064500  | 3.47321000  |
| H | 2.63566000  | 1.48592800  | 1.85379400  |
| C | 2.58477600  | -3.14950800 | -0.46737200 |
| H | 2.52670500  | -3.55034200 | 0.54713200  |
| H | 2.64092100  | -4.00630900 | -1.14900800 |
| H | 3.51306200  | -2.58603200 | -0.56422500 |
| C | 0.08163700  | -3.14169400 | -0.46322900 |
| H | -0.83759400 | -2.63802600 | -0.77670200 |
| H | 0.12917800  | -4.10615400 | -0.98214700 |
| H | 0.01553500  | -3.34958300 | 0.60857200  |
| C | 1.31816400  | -2.01102700 | -2.33194300 |
| H | 0.43844500  | -1.42751400 | -2.61999900 |
| H | 2.20739900  | -1.46437900 | -2.65437200 |
| H | 1.28397100  | -2.95630000 | -2.88511600 |
| C | 1.92104400  | 0.79832900  | -0.97988600 |
| C | 3.26266800  | 1.21947300  | -1.15565200 |
| C | 0.91157600  | 1.47975100  | -1.68968100 |
| C | 3.51048000  | 2.32250100  | -1.99568700 |
| C | 1.18480600  | 2.55160300  | -2.53436700 |
| H | -0.12304400 | 1.17097700  | -1.58143900 |
| C | 2.49846600  | 2.98695700  | -2.67999800 |
| H | 4.54022900  | 2.64320000  | -2.11750400 |
| H | 0.37124300  | 3.04025800  | -3.06102800 |
| H | 2.73788600  | 3.82804900  | -3.32319100 |
| C | 4.49162100  | 0.61322900  | -0.55599400 |
| C | 5.03938400  | -0.57102900 | -1.07097800 |
| C | 5.20959100  | 1.31394200  | 0.42736800  |
| C | 6.24560200  | -1.07237800 | -0.57606900 |
| H | 4.54037300  | -1.08074100 | -1.88929300 |
| C | 6.41438900  | 0.81308400  | 0.92255700  |
| H | 4.82038300  | 2.25614500  | 0.80298000  |
| C | 6.93074600  | -0.38682200 | 0.42842300  |
| H | 6.65830900  | -1.98787400 | -0.98938900 |

|                   |             |             |             |
|-------------------|-------------|-------------|-------------|
| H                 | 6.95264400  | 1.36389900  | 1.68799700  |
| H                 | 7.87030700  | -0.77460900 | 0.80969300  |
| Au                | -1.11381700 | -0.06143100 | 0.40533800  |
| TS <sub>5-6</sub> |             |             |             |
| C                 | -3.14278800 | 0.43705500  | 0.35034200  |
| C                 | -4.16838200 | -0.41924800 | -0.29983500 |
| C                 | -5.37572500 | 0.12486200  | -0.78188300 |
| C                 | -3.94603500 | -1.80468700 | -0.42225300 |
| C                 | -6.32070400 | -0.69609600 | -1.38901500 |
| H                 | -5.56237100 | 1.19054100  | -0.70880600 |
| C                 | -4.90137800 | -2.62445700 | -1.01494600 |
| H                 | -3.01894700 | -2.22901200 | -0.04831200 |
| C                 | -6.08813100 | -2.06991800 | -1.50237700 |
| H                 | -7.24091500 | -0.26616200 | -1.77101700 |
| H                 | -4.72011100 | -3.69072800 | -1.10390200 |
| H                 | -6.83065300 | -2.70728300 | -1.97256200 |
| C                 | -3.21268600 | 1.92944400  | 0.11618400  |
| O                 | -3.23370900 | 2.36813800  | -1.01267100 |
| O                 | -3.16419400 | 2.66237300  | 1.23575200  |
| C                 | -3.10181400 | 4.09898400  | 1.04587700  |
| H                 | -3.13344500 | 4.52113600  | 2.04842600  |
| H                 | -2.17177600 | 4.36601600  | 0.54056600  |
| H                 | -3.95288400 | 4.43665800  | 0.45264900  |
| N                 | -3.50063700 | 0.29456300  | 2.02564500  |
| N                 | -3.64579800 | -0.06306500 | 3.06525300  |
| P                 | 1.29286900  | -0.61817100 | 0.00798400  |
| C                 | 1.45852000  | -2.21931200 | -1.14516000 |
| C                 | 1.91179700  | -0.84682500 | 1.86877000  |
| C                 | 0.89980500  | -1.78452500 | 2.55439900  |
| H                 | 0.91123900  | -2.79102500 | 2.12586300  |
| H                 | 1.17645200  | -1.87771900 | 3.61071300  |
| H                 | -0.12390400 | -1.39985900 | 2.50882300  |
| C                 | 3.31831100  | -1.43525900 | 2.05351500  |
| H                 | 4.09129400  | -0.86510100 | 1.54607300  |
| H                 | 3.54466700  | -1.41707900 | 3.12633900  |
| H                 | 3.37926200  | -2.47485700 | 1.73111500  |
| C                 | 1.83614800  | 0.55481100  | 2.49868500  |
| H                 | 0.83955400  | 0.99733000  | 2.39697600  |
| H                 | 2.05861300  | 0.47220000  | 3.56857800  |
| H                 | 2.56402200  | 1.23982500  | 2.05779900  |
| C                 | 2.66054700  | -3.10529100 | -0.78621900 |
| H                 | 2.51732400  | -3.61860200 | 0.16795300  |
| H                 | 2.75924500  | -3.88009300 | -1.55573100 |
| H                 | 3.60123300  | -2.55526500 | -0.74544200 |
| C                 | 0.16650600  | -3.04110500 | -0.98801500 |
| H                 | -0.71099200 | -2.48605100 | -1.33268500 |
| H                 | 0.25138500  | -3.94756800 | -1.59876000 |

|          |             |             |             |
|----------|-------------|-------------|-------------|
| H        | -0.00556800 | -3.35644800 | 0.04529100  |
| C        | 1.57075600  | -1.72509300 | -2.59606300 |
| H        | 0.73201100  | -1.08294800 | -2.88113400 |
| H        | 2.49483900  | -1.17168200 | -2.77805600 |
| H        | 1.56318900  | -2.59587900 | -3.26137000 |
| C        | 2.02031200  | 0.89759400  | -0.89116300 |
| C        | 3.36544200  | 1.33725900  | -0.96076000 |
| C        | 1.03861100  | 1.65540700  | -1.56163600 |
| C        | 3.64311200  | 2.52855000  | -1.65920200 |
| C        | 1.34136300  | 2.81586000  | -2.26819100 |
| H        | 0.00207600  | 1.33496300  | -1.53203500 |
| C        | 2.65774300  | 3.26533400  | -2.30752400 |
| H        | 4.67532000  | 2.86170600  | -1.70037700 |
| H        | 0.54897100  | 3.35978600  | -2.77267000 |
| H        | 2.92020800  | 4.17309200  | -2.84193300 |
| C        | 4.56971800  | 0.66953600  | -0.37712300 |
| C        | 5.14121500  | -0.45961100 | -0.98208300 |
| C        | 5.24209300  | 1.26633200  | 0.70234600  |
| C        | 6.32609400  | -1.00994600 | -0.48769000 |
| H        | 4.67705400  | -0.88709600 | -1.86534700 |
| C        | 6.42505900  | 0.71609300  | 1.19750700  |
| H        | 4.83331600  | 2.16599900  | 1.15382300  |
| C        | 6.96567500  | -0.42917400 | 0.60878100  |
| H        | 6.75796200  | -1.88107000 | -0.97139300 |
| H        | 6.92744800  | 1.18609400  | 2.03760900  |
| H        | 7.88853100  | -0.85511700 | 0.99015400  |
| Au       | -1.09158900 | -0.10911600 | 0.25747400  |
| <b>6</b> |             |             |             |
| C        | -3.07314100 | 0.44840400  | -0.21877500 |
| C        | -4.20182400 | -0.39346100 | -0.36067800 |
| C        | -5.53058700 | 0.13231500  | -0.40217200 |
| C        | -4.02930700 | -1.80809200 | -0.44321900 |
| C        | -6.61772600 | -0.71400900 | -0.51877500 |
| H        | -5.68433000 | 1.20482900  | -0.34921500 |
| C        | -5.12291700 | -2.64851900 | -0.55260000 |
| H        | -3.02040700 | -2.20582000 | -0.41104500 |
| C        | -6.41387800 | -2.10124100 | -0.59181400 |
| H        | -7.62441500 | -0.31152600 | -0.55355100 |
| H        | -4.98685600 | -3.72313900 | -0.60986100 |
| H        | -7.27156500 | -2.76178900 | -0.68095100 |
| C        | -3.28718000 | 1.92188300  | -0.19093300 |
| O        | -3.22390900 | 2.55586000  | -1.22595500 |
| O        | -3.48728000 | 2.41507400  | 1.02958000  |
| C        | -3.57329900 | 3.86250300  | 1.12853400  |
| H        | -3.71534400 | 4.06686400  | 2.18767000  |
| H        | -2.64940000 | 4.31558200  | 0.76467100  |
| H        | -4.41797700 | 4.23076700  | 0.54393100  |

|   |             |             |             |
|---|-------------|-------------|-------------|
| N | -3.12162200 | -0.45074800 | 3.43709100  |
| N | -2.68957900 | 0.40521300  | 3.98641200  |
| P | 1.31182800  | -0.58989400 | -0.22129400 |
| C | 1.64009000  | -1.96763200 | -1.60605600 |
| C | 1.67071800  | -1.15452400 | 1.63558900  |
| C | 0.57165000  | -2.17102800 | 2.00105400  |
| H | 0.63363500  | -3.08196500 | 1.39799300  |
| H | 0.70784200  | -2.46546900 | 3.04799400  |
| H | -0.43562100 | -1.75477500 | 1.90013900  |
| C | 3.03754000  | -1.79915400 | 1.90601900  |
| H | 3.87251500  | -1.16857000 | 1.61385600  |
| H | 3.11412200  | -1.96918700 | 2.98676700  |
| H | 3.14261600  | -2.76941700 | 1.42068000  |
| C | 1.50939200  | 0.11848500  | 2.48500800  |
| H | 0.53873800  | 0.60056700  | 2.32716600  |
| H | 1.57868000  | -0.15431400 | 3.54425300  |
| H | 2.29449800  | 0.84902600  | 2.27623400  |
| C | 2.76861500  | -2.94252000 | -1.24220500 |
| H | 2.48437300  | -3.60578000 | -0.42128400 |
| H | 2.96992700  | -3.57801100 | -2.11291700 |
| H | 3.69881200  | -2.44051200 | -0.97503500 |
| C | 0.33308500  | -2.76169000 | -1.78522300 |
| H | -0.48256100 | -2.12605300 | -2.14322500 |
| H | 0.49843500  | -3.54761600 | -2.53150000 |
| H | 0.01270100  | -3.24934500 | -0.85971000 |
| C | 1.96637400  | -1.22979600 | -2.91386800 |
| H | 1.17943600  | -0.52488400 | -3.19841100 |
| H | 2.90693800  | -0.67738200 | -2.85747600 |
| H | 2.05670700  | -1.96881800 | -3.71802900 |
| C | 2.16320000  | 1.04171000  | -0.71995400 |
| C | 3.50928400  | 1.44529700  | -0.53671900 |
| C | 1.27995800  | 1.94397000  | -1.34689800 |
| C | 3.88150700  | 2.73791900  | -0.95440800 |
| C | 1.67741500  | 3.20777600  | -1.77429600 |
| H | 0.24537400  | 1.65637300  | -1.50459700 |
| C | 2.99148000  | 3.61476600  | -1.56536600 |
| H | 4.91277300  | 3.04091800  | -0.80328700 |
| H | 0.95900800  | 3.86279600  | -2.25710000 |
| H | 3.32597100  | 4.59880800  | -1.87888200 |
| C | 4.62499100  | 0.64495600  | 0.05671700  |
| C | 5.25816400  | -0.37467100 | -0.66887800 |
| C | 5.16211400  | 1.01711000  | 1.30047100  |
| C | 6.36729000  | -1.04120300 | -0.14270000 |
| H | 4.90567000  | -0.62189500 | -1.66516800 |
| C | 6.26934000  | 0.35091700  | 1.82714800  |
| H | 4.70678800  | 1.83265700  | 1.85531900  |
| C | 6.86975500  | -0.68654800 | 1.11033200  |
| H | 6.84875200  | -1.82445800 | -0.72070900 |

|           |             |             |             |
|-----------|-------------|-------------|-------------|
| H         | 6.66656700  | 0.64680900  | 2.79346100  |
| H         | 7.73397000  | -1.20237200 | 1.51728400  |
| Au        | -1.10415800 | -0.07514900 | -0.20875400 |
| <b>1a</b> |             |             |             |
| C         | -2.50371700 | -0.43403200 | 0.14599600  |
| C         | -3.45511700 | 0.31190500  | -0.59498900 |
| C         | -4.85983500 | 0.15550100  | -0.38657000 |
| C         | -3.01737000 | 1.23790800  | -1.58788400 |
| C         | -5.76777500 | 0.88059300  | -1.13676700 |
| H         | -5.21647000 | -0.53751600 | 0.36791500  |
| C         | -3.93270600 | 1.95809200  | -2.33647900 |
| H         | -1.95066300 | 1.36126100  | -1.74044400 |
| C         | -5.30481800 | 1.77827700  | -2.11166200 |
| H         | -6.83343100 | 0.75731500  | -0.97569800 |
| H         | -3.59370200 | 2.65780700  | -3.09302400 |
| H         | -6.02204900 | 2.34262400  | -2.70070900 |
| Au        | -0.48123300 | -0.38825500 | -0.01162100 |
| C         | -3.00262600 | -1.31603900 | 1.23790500  |
| O         | -3.08500200 | -0.88723400 | 2.37244700  |
| O         | -3.28307800 | -2.55789900 | 0.84291700  |
| C         | -3.68104200 | -3.48482200 | 1.88763300  |
| H         | -3.85586100 | -4.43006500 | 1.37783000  |
| H         | -2.88285300 | -3.58186000 | 2.62590600  |
| H         | -4.59062600 | -3.13342600 | 2.37783900  |
| P         | 1.92187200  | -0.70776100 | -0.37830800 |
| C         | 3.03577400  | 0.69487700  | 0.19924800  |
| C         | 2.54655400  | 1.92967900  | 0.68751400  |
| C         | 4.42668300  | 0.51675100  | 0.08441900  |
| C         | 3.47549000  | 2.93955000  | 1.00255300  |
| C         | 5.32843100  | 1.52267100  | 0.42191800  |
| H         | 4.82138300  | -0.41943300 | -0.28719300 |
| C         | 4.84755400  | 2.74893000  | 0.87539300  |
| H         | 3.09707400  | 3.88583900  | 1.37631000  |
| H         | 6.39499600  | 1.34699000  | 0.32313900  |
| H         | 5.53316600  | 3.54880500  | 1.13722000  |
| C         | 2.44261400  | -2.33144900 | 0.61366800  |
| C         | 2.17890100  | -0.82582500 | -2.32394200 |
| C         | 2.60913300  | -1.90638400 | 2.08315400  |
| H         | 2.80225600  | -2.79955200 | 2.68816100  |
| H         | 3.44548400  | -1.21807600 | 2.22614600  |
| H         | 1.70122400  | -1.43553800 | 2.47437500  |
| C         | 3.73034200  | -3.00161700 | 0.10919300  |
| H         | 3.92712100  | -3.87982000 | 0.73536300  |
| H         | 3.64200400  | -3.35690800 | -0.92047000 |
| H         | 4.60793500  | -2.35708300 | 0.18652700  |
| C         | 1.28284700  | -3.34008500 | 0.51025500  |
| H         | 1.09728300  | -3.66600400 | -0.51560200 |

|                           |             |             |             |
|---------------------------|-------------|-------------|-------------|
| H                         | 1.54081500  | -4.22862800 | 1.09804400  |
| H                         | 0.35135900  | -2.93048700 | 0.91147100  |
| C                         | 1.40809700  | -2.05198100 | -2.83971600 |
| H                         | 1.86949000  | -2.99274900 | -2.52807800 |
| H                         | 0.36379000  | -2.05002900 | -2.51145200 |
| H                         | 1.41298900  | -2.03565700 | -3.93562300 |
| C                         | 3.64908500  | -0.90335500 | -2.76202600 |
| H                         | 3.67659000  | -0.99497500 | -3.85414400 |
| H                         | 4.20530600  | -0.00148400 | -2.49900800 |
| H                         | 4.17074300  | -1.77016200 | -2.35192600 |
| C                         | 1.55583700  | 0.45986800  | -2.89824800 |
| H                         | 2.04373900  | 1.35897000  | -2.51003800 |
| H                         | 1.67911100  | 0.45775300  | -3.98733100 |
| H                         | 0.48502600  | 0.52373000  | -2.68149100 |
| C                         | 1.11358400  | 2.27983100  | 0.93776600  |
| C                         | 0.50208800  | 3.30242000  | 0.19509600  |
| C                         | 0.40641700  | 1.72093600  | 2.01909600  |
| C                         | -0.77903100 | 3.75374800  | 0.52144100  |
| H                         | 1.04547600  | 3.76054200  | -0.62649900 |
| C                         | -0.87422300 | 2.17885100  | 2.34941200  |
| H                         | 0.88405300  | 0.96775400  | 2.63866500  |
| C                         | -1.46786600 | 3.19727700  | 1.60213800  |
| H                         | -1.22726900 | 4.55848500  | -0.05426900 |
| H                         | -1.39766200 | 1.74368300  | 3.19472400  |
| H                         | -2.45368800 | 3.56508800  | 1.87004300  |
| <b>TS<sub>1a-2a</sub></b> |             |             |             |
| C                         | -1.20730300 | -2.18734500 | -0.23762700 |
| C                         | -2.48502500 | -2.17201800 | -0.87821800 |
| C                         | -3.32159200 | -3.32342000 | -0.90096400 |
| C                         | -2.95127200 | -0.98933100 | -1.51262300 |
| C                         | -4.54872500 | -3.29333700 | -1.54277200 |
| H                         | -3.00297100 | -4.23164200 | -0.40006900 |
| C                         | -4.17811700 | -0.96476100 | -2.15608900 |
| H                         | -2.32413900 | -0.10578900 | -1.47988500 |
| C                         | -4.97606600 | -2.11652400 | -2.17267800 |
| H                         | -5.17962500 | -4.17584300 | -1.55524500 |
| H                         | -4.52145600 | -0.05828700 | -2.64362800 |
| H                         | -5.93810100 | -2.09707100 | -2.67636800 |
| Au                        | 0.21130000  | -0.71348600 | -0.36686800 |
| C                         | -0.70818300 | -3.52331600 | 0.24199500  |
| O                         | -0.79837600 | -3.95820800 | 1.37771200  |
| O                         | -0.11747300 | -4.16955700 | -0.76737500 |
| C                         | 0.43351600  | -5.47587300 | -0.46404600 |
| H                         | 0.82033800  | -5.84777300 | -1.41075300 |
| H                         | 1.23318400  | -5.38494300 | 0.27280100  |
| H                         | -0.34615900 | -6.13367800 | -0.07601600 |
| P                         | 1.80046800  | 1.05251200  | -1.01820600 |

|   |             |             |             |
|---|-------------|-------------|-------------|
| C | 3.36731400  | 1.33076000  | -0.00638900 |
| C | 3.63902300  | 0.69924000  | 1.22840400  |
| C | 4.28569300  | 2.27997800  | -0.49274900 |
| C | 4.79682300  | 1.07850100  | 1.93501300  |
| C | 5.43622100  | 2.62427500  | 0.21131100  |
| H | 4.09747400  | 2.77541600  | -1.43475800 |
| C | 5.68826100  | 2.02593000  | 1.44367600  |
| H | 4.99988500  | 0.59111600  | 2.88345800  |
| H | 6.12116100  | 3.35897900  | -0.20019800 |
| H | 6.57474400  | 2.28541200  | 2.01403500  |
| C | 2.37283100  | 0.57633200  | -2.85129200 |
| C | 0.80937600  | 2.75016700  | -0.89426400 |
| C | 3.48351500  | -0.47664200 | -2.69459100 |
| H | 3.77016000  | -0.83844400 | -3.68863700 |
| H | 4.37696100  | -0.06983300 | -2.21512500 |
| H | 3.14152000  | -1.34096000 | -2.11553200 |
| C | 2.88007200  | 1.75924600  | -3.69201900 |
| H | 3.14858500  | 1.38197900  | -4.68581400 |
| H | 2.11636300  | 2.52742200  | -3.83613300 |
| H | 3.77672900  | 2.22631600  | -3.28147100 |
| C | 1.17322800  | -0.06205000 | -3.57710600 |
| H | 0.33546300  | 0.62950000  | -3.69343800 |
| H | 1.49457900  | -0.36183300 | -4.58133000 |
| H | 0.81255900  | -0.95624600 | -3.06088500 |
| C | -0.38273600 | 2.68701100  | -1.86202100 |
| H | -0.06986100 | 2.72972800  | -2.90884500 |
| H | -0.98157400 | 1.78388700  | -1.71305900 |
| H | -1.03348800 | 3.54892900  | -1.67728400 |
| C | 1.64985700  | 4.00223600  | -1.18751900 |
| H | 0.99186300  | 4.87609100  | -1.11353800 |
| H | 2.45272600  | 4.13985700  | -0.46085600 |
| H | 2.07995100  | 4.00554700  | -2.19161400 |
| C | 0.30361500  | 2.81604400  | 0.55830100  |
| H | 1.13104400  | 2.82313700  | 1.27467600  |
| H | -0.26283100 | 3.74459600  | 0.69367200  |
| H | -0.36405600 | 1.98492200  | 0.80384600  |
| C | 2.83790000  | -0.38827300 | 1.86992000  |
| C | 2.18947000  | -0.15614700 | 3.09254600  |
| C | 2.88915600  | -1.70153600 | 1.37354800  |
| C | 1.60269100  | -1.20861700 | 3.80017100  |
| H | 2.16974600  | 0.84953700  | 3.50279900  |
| C | 2.30964800  | -2.75265500 | 2.08610500  |
| H | 3.43000200  | -1.90321900 | 0.45350000  |
| C | 1.66349100  | -2.51086100 | 3.30039300  |
| H | 1.12366300  | -1.01271100 | 4.75529200  |
| H | 2.38842700  | -3.76682000 | 1.70708100  |
| H | 1.22590000  | -3.33371200 | 3.85683300  |
| C | -3.15383100 | 1.53823900  | 1.89948800  |

|           |             |             |             |
|-----------|-------------|-------------|-------------|
| C         | -2.63966500 | 0.51407200  | 2.29755800  |
| C         | -2.02399700 | -0.69984500 | 2.82200200  |
| H         | -0.94534800 | -0.54384300 | 2.95740500  |
| H         | -2.45170000 | -0.93080500 | 3.80970500  |
| O         | -2.26677100 | -1.80030000 | 1.93784400  |
| H         | -1.77173200 | -2.58455800 | 2.24329600  |
| C         | -3.76525600 | 2.74483100  | 1.43630800  |
| C         | -4.80097100 | 2.69981100  | 0.48274700  |
| C         | -3.34478600 | 3.99476600  | 1.93179100  |
| C         | -5.39379300 | 3.87779200  | 0.03441000  |
| H         | -5.13621400 | 1.73684200  | 0.11028300  |
| C         | -3.94646100 | 5.16702600  | 1.47999600  |
| H         | -2.55639900 | 4.03295200  | 2.67682200  |
| C         | -4.96935600 | 5.11329100  | 0.52986100  |
| H         | -6.19518300 | 3.83238700  | -0.69708300 |
| H         | -3.62025800 | 6.12476600  | 1.87432200  |
| H         | -5.43807500 | 6.02893100  | 0.18252000  |
| <b>2a</b> |             |             |             |
| C         | -2.91933600 | -0.81675200 | 0.19206200  |
| C         | -3.59860800 | -2.15722700 | 0.28995100  |
| C         | -4.80223700 | -2.29242600 | 1.01211500  |
| C         | -3.08948100 | -3.28264500 | -0.38374300 |
| C         | -5.46105800 | -3.51841500 | 1.07268800  |
| H         | -5.21944400 | -1.43562300 | 1.53412300  |
| C         | -3.75052600 | -4.50873400 | -0.32229500 |
| H         | -2.16374300 | -3.18903700 | -0.94331400 |
| C         | -4.93455700 | -4.62907800 | 0.40823400  |
| H         | -6.38225800 | -3.60814200 | 1.63977300  |
| H         | -3.33960400 | -5.37003600 | -0.83978400 |
| H         | -5.44594800 | -5.58534600 | 0.46025600  |
| Au        | -0.85072900 | -0.77545000 | -0.27828000 |
| C         | -3.13396500 | 0.08435500  | 1.39708200  |
| O         | -3.64555800 | 1.18219100  | 1.39556700  |
| O         | -2.61750100 | -0.51475400 | 2.48678600  |
| C         | -2.68048500 | 0.24934600  | 3.71020000  |
| H         | -3.71426900 | 0.51254800  | 3.94285600  |
| H         | -2.26607900 | -0.40153000 | 4.47828000  |
| H         | -2.08748400 | 1.16198400  | 3.61714800  |
| P         | 1.58492300  | -0.81203900 | -0.58891600 |
| C         | 2.27271100  | 0.80398100  | 0.16187500  |
| C         | 3.56535100  | 1.11517300  | 0.66084800  |
| C         | 1.30049000  | 1.82631300  | 0.15507900  |
| C         | 3.80215200  | 2.42785900  | 1.11458600  |
| C         | 1.56475800  | 3.11949900  | 0.59862600  |
| H         | 0.30127300  | 1.60532000  | -0.20587300 |
| C         | 2.83198000  | 3.42384500  | 1.08491700  |
| H         | 4.79086800  | 2.65646400  | 1.49995100  |

|   |             |             |             |
|---|-------------|-------------|-------------|
| H | 0.78073300  | 3.86902400  | 0.56822700  |
| H | 3.06619600  | 4.42148500  | 1.44361500  |
| C | 2.15817900  | -2.47081400 | 0.29870000  |
| C | 1.98860300  | -0.74253900 | -2.51024700 |
| C | 2.03353100  | -2.20803300 | 1.80905400  |
| H | 2.25059500  | -3.13848000 | 2.34630000  |
| H | 2.73517300  | -1.45182700 | 2.15762400  |
| H | 1.01926200  | -1.89609100 | 2.07965000  |
| C | 3.57011700  | -2.94131100 | -0.07756300 |
| H | 3.80030100  | -3.84116600 | 0.50507900  |
| H | 3.63777700  | -3.21875200 | -1.13336100 |
| H | 4.33754000  | -2.20195100 | 0.13953100  |
| C | 1.15037700  | -3.57627400 | -0.07700600 |
| H | 1.15348200  | -3.81431700 | -1.14212800 |
| H | 1.43343600  | -4.48682200 | 0.46362200  |
| H | 0.13029800  | -3.31792800 | 0.22101700  |
| C | 1.51812100  | -2.04662000 | -3.17291900 |
| H | 2.13211400  | -2.90438600 | -2.88864900 |
| H | 0.47194900  | -2.27204600 | -2.94183600 |
| H | 1.60023500  | -1.93558800 | -4.26032800 |
| C | 3.47815600  | -0.50983400 | -2.78579600 |
| H | 3.64067100  | -0.51247100 | -3.87025000 |
| H | 3.79826200  | 0.46403100  | -2.40961800 |
| H | 4.11726400  | -1.28046000 | -2.35068100 |
| C | 1.18405200  | 0.43694400  | -3.08444400 |
| H | 1.46003900  | 1.38826400  | -2.62221500 |
| H | 1.39157500  | 0.51496700  | -4.15808500 |
| H | 0.10673800  | 0.29196700  | -2.95794300 |
| C | 4.75370900  | 0.20892500  | 0.81652700  |
| C | 5.04071700  | -0.34579200 | 2.07503000  |
| C | 5.69704000  | 0.04902100  | -0.20960500 |
| C | 6.19782800  | -1.09831800 | 2.28071100  |
| H | 4.36036800  | -0.17020000 | 2.90328200  |
| C | 6.85631900  | -0.70255600 | -0.00523000 |
| H | 5.53772000  | 0.53197000  | -1.16647200 |
| C | 7.10445800  | -1.28919500 | 1.23654300  |
| H | 6.39630600  | -1.52289000 | 3.26029500  |
| H | 7.57258300  | -0.81464500 | -0.81381900 |
| H | 8.00704500  | -1.87120800 | 1.39561600  |
| C | -2.40993200 | 3.05760500  | -1.19983800 |
| C | -2.77728800 | 1.97602300  | -1.60689600 |
| C | -3.26155300 | 0.70486600  | -2.07394200 |
| H | -4.10113000 | 0.80607700  | -2.76975300 |
| H | -2.47754200 | 0.08193300  | -2.51608900 |
| O | -3.84634900 | -0.07883600 | -0.93519500 |
| H | -4.41987200 | -0.78723200 | -1.28395700 |
| C | -2.00365600 | 4.31383000  | -0.65805700 |
| C | -2.30353500 | 4.60852100  | 0.68750800  |

|           |             |             |             |
|-----------|-------------|-------------|-------------|
| C         | -1.31533200 | 5.25653900  | -1.44468500 |
| C         | -1.91219400 | 5.82990900  | 1.23007500  |
| H         | -2.83877900 | 3.87523400  | 1.28233400  |
| C         | -0.93373500 | 6.47554000  | -0.88934700 |
| H         | -1.09139100 | 5.02945400  | -2.48198700 |
| C         | -1.22912100 | 6.76403600  | 0.44579600  |
| H         | -2.14604300 | 6.05663800  | 2.26578300  |
| H         | -0.40767200 | 7.20277000  | -1.49998400 |
| H         | -0.93187000 | 7.71698600  | 0.87278300  |
| <b>3a</b> |             |             |             |
| C         | -3.28665300 | -1.20638800 | -0.06035700 |
| C         | -4.22906300 | -2.31302600 | 0.08015700  |
| C         | -3.83335900 | -3.53851700 | 0.65932000  |
| C         | -5.54854100 | -2.21072300 | -0.41220700 |
| C         | -4.72671300 | -4.60118800 | 0.74593700  |
| H         | -2.82492300 | -3.64631800 | 1.03691800  |
| C         | -6.42755900 | -3.29248500 | -0.34413100 |
| H         | -5.92398500 | -1.26672700 | -0.79976000 |
| C         | -6.02434600 | -4.49265500 | 0.23710000  |
| H         | -4.39898600 | -5.53196100 | 1.19960600  |
| H         | -7.43663200 | -3.18314100 | -0.73017700 |
| H         | -6.71017300 | -5.33162700 | 0.29744400  |
| Au        | 0.61827800  | 0.19677500  | -0.12034300 |
| C         | -2.12291400 | -0.85367200 | 0.57228400  |
| O         | -1.45329300 | 0.21787500  | 0.26536200  |
| O         | -1.71937200 | -1.66230000 | 1.58532500  |
| C         | -1.19260900 | -1.02100100 | 2.76167900  |
| H         | -1.91774000 | -0.30802600 | 3.16723700  |
| H         | -1.02406900 | -1.82465500 | 3.47814800  |
| H         | -0.24943800 | -0.51059000 | 2.55075100  |
| P         | 2.95693100  | 0.25399600  | -0.59723600 |
| C         | 3.80634900  | 1.16111600  | 0.85288700  |
| C         | 5.15060800  | 1.11036100  | 1.30598600  |
| C         | 2.91769800  | 2.03875200  | 1.50826200  |
| C         | 5.51903300  | 1.94228900  | 2.38205100  |
| C         | 3.31183100  | 2.85949200  | 2.56082200  |
| H         | 1.88182400  | 2.07689800  | 1.18720500  |
| C         | 4.62932600  | 2.81066600  | 3.00480000  |
| H         | 6.54686600  | 1.89281500  | 2.72738200  |
| H         | 2.58860200  | 3.52030800  | 3.02846100  |
| H         | 4.96360900  | 3.43400400  | 3.82835300  |
| C         | 3.46464500  | -1.62810000 | -0.85566700 |
| C         | 3.20045900  | 1.39599800  | -2.17922300 |
| C         | 3.46843400  | -2.26338200 | 0.54482200  |
| H         | 3.65508200  | -3.33827700 | 0.44053200  |
| H         | 4.24582800  | -1.85230300 | 1.18721600  |
| H         | 2.50082200  | -2.13987400 | 1.04229200  |

|   |              |             |             |
|---|--------------|-------------|-------------|
| C | 4.80914000   | -1.82058700 | -1.57111700 |
| H | 5.02086700   | -2.89514000 | -1.61830100 |
| H | 4.77492300   | -1.45525200 | -2.60125000 |
| H | 5.63996000   | -1.34166200 | -1.05838600 |
| C | 2.35699700   | -2.30637400 | -1.68787800 |
| H | 2.28613300   | -1.91540600 | -2.70382700 |
| H | 2.60195300   | -3.37213000 | -1.76243300 |
| H | 1.37418300   | -2.22242000 | -1.21506100 |
| C | 2.60901800   | 0.69214400  | -3.41046500 |
| H | 3.19200800   | -0.18094000 | -3.71343400 |
| H | 1.57069400   | 0.38471100  | -3.25187800 |
| H | 2.62080800   | 1.39656000  | -4.25012500 |
| C | 4.67659500   | 1.73674100  | -2.41393000 |
| H | 4.75335600   | 2.35961900  | -3.31290400 |
| H | 5.08425700   | 2.31363500  | -1.58083200 |
| H | 5.29985100   | 0.85363100  | -2.56862600 |
| C | 2.42108000   | 2.69542500  | -1.91129600 |
| H | 2.79656000   | 3.22808100  | -1.03357900 |
| H | 2.54006700   | 3.35759200  | -2.77666800 |
| H | 1.35204800   | 2.50707000  | -1.77314300 |
| C | 6.27301200   | 0.24206100  | 0.81282000  |
| C | 6.60489600   | -0.92558900 | 1.51995100  |
| C | 7.12473500   | 0.65765300  | -0.22174400 |
| C | 7.71204400   | -1.69359400 | 1.15663500  |
| H | 6.00119400   | -1.22312800 | 2.37242400  |
| C | 8.23468400   | -0.10850400 | -0.58467900 |
| H | 6.93332700   | 1.59379600  | -0.73304400 |
| C | 8.52453900   | -1.29266900 | 0.09470100  |
| H | 7.94649600   | -2.59628700 | 1.71285500  |
| H | 8.88080600   | 0.23025200  | -1.38912800 |
| H | 9.38889700   | -1.88639500 | -0.18655100 |
| C | -6.44848500  | 1.55369400  | -0.44957700 |
| C | -5.28869400  | 1.32817600  | -0.74019500 |
| C | -3.91835900  | 1.13911200  | -1.09764400 |
| H | -3.65808400  | 1.53106800  | -2.08326900 |
| H | -3.18239200  | 1.45391600  | -0.35873700 |
| O | -3.53236200  | -0.36836200 | -1.25517100 |
| H | -4.19516100  | -0.83349600 | -1.80466000 |
| C | -7.80450200  | 1.80986300  | -0.10141000 |
| C | -8.21350300  | 1.74314300  | 1.24630700  |
| C | -8.74529700  | 2.13423300  | -1.10032100 |
| C | -9.53987300  | 1.99490300  | 1.58190500  |
| H | -7.48663300  | 1.49361800  | 2.01215400  |
| C | -10.06814700 | 2.38732300  | -0.75201600 |
| H | -8.42730100  | 2.18703700  | -2.13645700 |
| C | -10.46656700 | 2.31735200  | 0.58613100  |
| H | -9.85270800  | 1.94186100  | 2.61987100  |
| H | -10.78992100 | 2.63918600  | -1.52250600 |

|                    |              |             |             |
|--------------------|--------------|-------------|-------------|
| H                  | -11.50019600 | 2.51501600  | 0.85320900  |
| TS <sub>2a-7</sub> |              |             |             |
| C                  | 2.42070100   | 0.50818700  | 1.09833400  |
| C                  | 5.23783400   | -0.02088300 | 1.45668400  |
| C                  | 5.04878600   | 0.68107600  | 2.46822300  |
| C                  | 4.69411800   | 1.44319900  | 3.51243900  |
| H                  | 4.67903000   | 2.52563900  | 3.43505800  |
| H                  | 4.49790400   | 1.00217700  | 4.48606300  |
| C                  | 5.70193300   | -0.78672800 | 0.37769000  |
| C                  | 6.02001800   | -0.16600900 | -0.85801300 |
| C                  | 5.86678900   | -2.19148400 | 0.50564000  |
| C                  | 6.50687900   | -0.92767700 | -1.91563900 |
| H                  | 5.90717200   | 0.90795900  | -0.95349900 |
| C                  | 6.35085600   | -2.93605200 | -0.55881500 |
| H                  | 5.63464800   | -2.66396700 | 1.45414800  |
| C                  | 6.67321500   | -2.30735500 | -1.77054000 |
| H                  | 6.76523200   | -0.44442100 | -2.85263800 |
| H                  | 6.49222700   | -4.00686300 | -0.44991200 |
| H                  | 7.06146100   | -2.89539300 | -2.59658900 |
| C                  | 2.38696300   | -0.87681300 | 1.60810200  |
| O                  | 2.20575800   | -1.06058300 | 2.81225100  |
| O                  | 2.50947200   | -1.86469200 | 0.70366900  |
| C                  | 2.36550100   | -3.20279000 | 1.22788600  |
| H                  | 1.33924000   | -3.36676200 | 1.56514900  |
| H                  | 2.60682800   | -3.86444700 | 0.39737300  |
| H                  | 3.04806800   | -3.36343600 | 2.06348100  |
| C                  | 2.65203700   | 1.05573700  | -0.24343300 |
| C                  | 2.71575900   | 2.47202400  | -0.40277100 |
| C                  | 2.85133100   | 0.24440200  | -1.40055200 |
| C                  | 2.93725600   | 3.03371100  | -1.65264800 |
| H                  | 2.59719900   | 3.10372000  | 0.46922100  |
| C                  | 3.05545800   | 0.83552100  | -2.64583900 |
| H                  | 2.84140700   | -0.83264900 | -1.30325000 |
| C                  | 3.09965000   | 2.22400200  | -2.78509200 |
| H                  | 2.98814000   | 4.11438900  | -1.74689100 |
| H                  | 3.19964400   | 0.19741300  | -3.51252100 |
| H                  | 3.26924900   | 2.67278500  | -3.75854800 |
| O                  | 2.30701500   | 1.40316700  | 2.11398200  |
| H                  | 2.19288700   | 0.84452400  | 2.91572300  |
| Au                 | 0.19576200   | 0.61538500  | 0.06573600  |
| P                  | -2.19231000  | 0.60302600  | -0.23561700 |
| C                  | -2.67332500  | -1.16683100 | -0.76186200 |
| C                  | -3.91386000  | -1.84568600 | -0.64488700 |
| C                  | -1.60853800  | -1.82958400 | -1.40669600 |
| C                  | -4.01058700  | -3.14374500 | -1.18464600 |
| C                  | -1.73661300  | -3.10709800 | -1.94334500 |
| H                  | -0.64910700  | -1.32939000 | -1.48905800 |

|   |             |             |             |
|---|-------------|-------------|-------------|
| C | -2.95264500 | -3.77387000 | -1.83051600 |
| H | -4.96012400 | -3.66020500 | -1.08607500 |
| H | -0.88860100 | -3.57199400 | -2.43655700 |
| H | -3.07951700 | -4.77366100 | -2.23403000 |
| C | -2.89109000 | 1.23543900  | 1.49552900  |
| C | -2.59329400 | 1.76515200  | -1.77268800 |
| C | -2.70952900 | 0.07105600  | 2.48209100  |
| H | -3.01039000 | 0.41107400  | 3.47960600  |
| H | -3.32490500 | -0.79005700 | 2.22597300  |
| H | -1.66359300 | -0.24726100 | 2.54087300  |
| C | -4.35101700 | 1.70697100  | 1.43650700  |
| H | -4.65274900 | 2.00587500  | 2.44701400  |
| H | -4.47015600 | 2.58395200  | 0.79410700  |
| H | -5.03672900 | 0.93170500  | 1.10267100  |
| C | -2.00348900 | 2.40732900  | 1.96022200  |
| H | -2.06295600 | 3.27722200  | 1.30472200  |
| H | -2.35575600 | 2.71794600  | 2.95051300  |
| H | -0.95328000 | 2.11660800  | 2.05811700  |
| C | -2.28213900 | 3.22255800  | -1.40096400 |
| H | -2.97953600 | 3.62534600  | -0.66273400 |
| H | -1.26099400 | 3.34308300  | -1.02653600 |
| H | -2.37686400 | 3.83611600  | -2.30410700 |
| C | -4.05490400 | 1.61966000  | -2.21253000 |
| H | -4.24061800 | 2.31189200  | -3.04197300 |
| H | -4.25833100 | 0.61020300  | -2.57698100 |
| H | -4.76340500 | 1.85542700  | -1.41638700 |
| C | -1.67097200 | 1.32405500  | -2.92260200 |
| H | -1.83955300 | 0.28317300  | -3.21095600 |
| H | -1.88712000 | 1.94827400  | -3.79731400 |
| H | -0.61309900 | 1.45126000  | -2.67268800 |
| C | -5.17453000 | -1.37903000 | 0.02482600  |
| C | -5.47108000 | -1.82403800 | 1.32396900  |
| C | -6.15849900 | -0.66430100 | -0.67457600 |
| C | -6.68520400 | -1.50224200 | 1.93231400  |
| H | -4.75214300 | -2.44237900 | 1.85368500  |
| C | -7.37534400 | -0.34448400 | -0.06803300 |
| H | -5.98429200 | -0.37452400 | -1.70423300 |
| C | -7.63765100 | -0.75150400 | 1.24092600  |
| H | -6.89115600 | -1.85120200 | 2.93973400  |
| H | -8.12368500 | 0.21002300  | -0.62643100 |
| H | -8.58482600 | -0.50435300 | 1.71037200  |
| 7 |             |             |             |
| C | -2.86178100 | -0.54891700 | -1.00860100 |
| C | -4.34817200 | -0.92147900 | -1.33673600 |
| C | -4.61565600 | -1.29574800 | -2.56684000 |
| C | -4.91377900 | -1.66222500 | -3.78316400 |
| H | -5.21630900 | -0.93724200 | -4.53520700 |

|    |             |             |             |
|----|-------------|-------------|-------------|
| H  | -4.87573400 | -2.70567000 | -4.08784700 |
| C  | -5.44435600 | -0.87212400 | -0.31270900 |
| C  | -6.14422300 | 0.32395400  | -0.08833400 |
| C  | -5.82332600 | -2.02070100 | 0.39768700  |
| C  | -7.18846800 | 0.37340400  | 0.83560600  |
| H  | -5.87882800 | 1.21205100  | -0.65472400 |
| C  | -6.86695200 | -1.97030300 | 1.32292100  |
| H  | -5.30511300 | -2.95624400 | 0.21402400  |
| C  | -7.54933700 | -0.77289800 | 1.54653900  |
| H  | -7.72692400 | 1.30358600  | 0.99129200  |
| H  | -7.15474400 | -2.86925300 | 1.86015200  |
| H  | -8.36551600 | -0.73633100 | 2.26181000  |
| C  | -2.15069000 | -1.82477800 | -0.48138300 |
| O  | -1.27738400 | -2.36493300 | -1.13518100 |
| O  | -2.60992100 | -2.27710800 | 0.68207900  |
| C  | -2.00739700 | -3.49985000 | 1.17501300  |
| H  | -0.96202500 | -3.32031500 | 1.43432700  |
| H  | -2.58479400 | -3.76748200 | 2.05825400  |
| H  | -2.06917200 | -4.28116000 | 0.41614700  |
| C  | -2.75264100 | 0.63271000  | -0.03414000 |
| C  | -2.29237100 | 1.88334500  | -0.54429900 |
| C  | -3.15030600 | 0.56653600  | 1.30872200  |
| C  | -2.24577200 | 3.02244400  | 0.30069000  |
| H  | -2.19089000 | 2.00149400  | -1.61906200 |
| C  | -3.09534400 | 1.70055400  | 2.12458300  |
| H  | -3.51838400 | -0.36564600 | 1.71507000  |
| C  | -2.63682300 | 2.92610400  | 1.63620000  |
| H  | -1.94406000 | 3.97742800  | -0.11843800 |
| H  | -3.42281000 | 1.62206000  | 3.15698500  |
| H  | -2.60648100 | 3.79906300  | 2.27991500  |
| O  | -2.18879100 | -0.19890800 | -2.19704300 |
| H  | -1.66660700 | -0.98104900 | -2.45099200 |
| Au | -0.05969500 | 1.37955400  | -0.20858300 |
| P  | 2.28772600  | 0.83203500  | -0.06829700 |
| C  | 2.44703900  | -0.60206800 | 1.18124500  |
| C  | 3.46796000  | -1.57874000 | 1.32061000  |
| C  | 1.38270200  | -0.61532700 | 2.10630000  |
| C  | 3.35877500  | -2.50333800 | 2.37869900  |
| C  | 1.30855800  | -1.53067600 | 3.15239900  |
| H  | 0.58475000  | 0.11295100  | 2.00397200  |
| C  | 2.30890200  | -2.48849300 | 3.29034300  |
| H  | 4.13986200  | -3.25062600 | 2.47610100  |
| H  | 0.47422300  | -1.49017100 | 3.84599700  |
| H  | 2.27593400  | -3.21761800 | 4.09402400  |
| C  | 2.79669500  | 0.43068600  | -1.93023500 |
| C  | 3.19999800  | 2.38329200  | 0.72917800  |
| C  | 2.21457100  | -0.95603800 | -2.24592900 |
| H  | 2.36428800  | -1.15967800 | -3.31255600 |



|          |            |             |             |
|----------|------------|-------------|-------------|
| H        | 2.70944000 | -1.74773900 | -1.68623200 |
| H        | 1.14028300 | -1.00694100 | -2.04359900 |
| C        | 4.31070700 | 0.48031300  | -2.17850900 |
| H        | 4.49370200 | 0.20542700  | -3.22366200 |
| H        | 4.71339000 | 1.48666800  | -2.03565500 |
| H        | 4.86797200 | -0.21286100 | -1.55220200 |
| C        | 2.10319000 | 1.46830000  | -2.83574700 |
| H        | 2.43447800 | 2.49106400  | -2.65016400 |
| H        | 2.35519500 | 1.22501500  | -3.87424300 |
| H        | 1.01331000 | 1.43215400  | -2.74412000 |
| C        | 3.15479500 | 3.55904900  | -0.25854900 |
| H        | 3.77941400 | 3.39092900  | -1.13886600 |
| H        | 2.13518200 | 3.78435600  | -0.58684600 |
| H        | 3.54170500 | 4.45040700  | 0.24829600  |
| C        | 4.64843100 | 2.05180300  | 1.10656900  |
| H        | 5.12078200 | 2.95633100  | 1.50691800  |
| H        | 4.68681000 | 1.28973400  | 1.88802500  |
| H        | 5.24329100 | 1.71444600  | 0.25608700  |
| C        | 2.41964300 | 2.75464400  | 2.00209200  |
| H        | 2.40112900 | 1.93739000  | 2.72808400  |
| H        | 2.91636900 | 3.60813300  | 2.47759400  |
| H        | 1.38898000 | 3.04722200  | 1.77897000  |
| C        | 4.67520100 | -1.80042300 | 0.45452600  |
| C        | 4.65515100 | -2.82556400 | -0.50611300 |
| C        | 5.89012600 | -1.14432400 | 0.70283500  |
| C        | 5.79589100 | -3.13395800 | -1.24844300 |
| H        | 3.74342800 | -3.39555100 | -0.66004600 |
| C        | 7.03329900 | -1.45452400 | -0.03737800 |
| H        | 5.95189900 | -0.40533300 | 1.49291300  |
| C        | 6.98653900 | -2.44070700 | -1.02372400 |
| H        | 5.75653700 | -3.92502600 | -1.99121500 |
| H        | 7.96396900 | -0.93476000 | 0.16982300  |
| H        | 7.87621000 | -2.68252000 | -1.59696100 |
| <b>8</b> |            |             |             |
| C        | 2.35124500 | -1.46487900 | -0.33338900 |
| C        | 1.83085700 | -2.60749200 | -0.82585500 |
| H        | 1.77624800 | -2.76539900 | -1.90237000 |
| H        | 1.74266500 | -3.49084500 | -0.19421900 |
| C        | 3.06383600 | -0.43965300 | 0.07156300  |
| C        | 2.41564900 | 0.80183100  | 0.60126500  |
| C        | 1.94210200 | 0.84641100  | 1.92128600  |
| C        | 2.26826900 | 1.92876300  | -0.22152300 |
| C        | 1.33743700 | 2.00467100  | 2.41233500  |
| H        | 2.07301700 | -0.01758700 | 2.56439000  |
| C        | 1.65620000 | 3.08166800  | 0.27214100  |
| H        | 2.64377500 | 1.90418700  | -1.23915500 |
| C        | 1.19305700 | 3.12343200  | 1.58885300  |

|   |             |             |             |
|---|-------------|-------------|-------------|
| H | 0.98784900  | 2.03493100  | 3.44010000  |
| H | 1.54971600  | 3.94968600  | -0.37113200 |
| H | 0.72798100  | 4.02610500  | 1.97345700  |
| C | 4.61236200  | -0.60127800 | -0.07194300 |
| C | 5.25541900  | -0.99848500 | 1.28497300  |
| O | 6.05009600  | -1.91452000 | 1.34266200  |
| O | 4.87007200  | -0.26201300 | 2.32610700  |
| C | 5.51559500  | -0.57276300 | 3.58749800  |
| H | 5.08182200  | 0.11645400  | 4.30980700  |
| H | 5.31604900  | -1.60909100 | 3.86546400  |
| H | 6.59291800  | -0.42070700 | 3.50231000  |
| C | 5.27002100  | 0.67554300  | -0.63143900 |
| C | 5.61192400  | 0.70180500  | -1.99043400 |
| C | 5.53271400  | 1.80169000  | 0.16171100  |
| C | 6.20553900  | 1.83547000  | -2.54592000 |
| H | 5.42578800  | -0.17551100 | -2.59834800 |
| C | 6.13360300  | 2.93046300  | -0.39749200 |
| H | 5.27198900  | 1.80255200  | 1.21338500  |
| C | 6.47018400  | 2.95245100  | -1.75143400 |
| H | 6.47025800  | 1.84024600  | -3.59913200 |
| H | 6.34032600  | 3.79236800  | 0.22985400  |
| H | 6.94045700  | 3.83089000  | -2.18300100 |
| O | 4.82726200  | -1.69652600 | -0.93199800 |
| P | -2.40471300 | -0.84117500 | -0.21019400 |
| C | -2.85524200 | -1.02304600 | 1.69712400  |
| C | -3.33663600 | -2.10659600 | -1.39889000 |
| C | -3.24274600 | -3.52056700 | -0.80680500 |
| H | -3.83352900 | -3.63173900 | 0.10513100  |
| H | -3.64127600 | -4.23038500 | -1.54038900 |
| H | -2.20903800 | -3.81260700 | -0.59559500 |
| C | -4.80104400 | -1.70813900 | -1.61402000 |
| H | -4.87495100 | -0.74768200 | -2.12864900 |
| H | -5.27709100 | -2.46046200 | -2.25366900 |
| H | -5.36974600 | -1.65406800 | -0.68423700 |
| C | -2.60435100 | -2.06947700 | -2.75191500 |
| H | -1.56804400 | -2.41213100 | -2.66729800 |
| H | -3.12202400 | -2.74170400 | -3.44566300 |
| H | -2.60607200 | -1.07066600 | -3.19604900 |
| C | -4.35924600 | -1.17595600 | 1.96609300  |
| H | -4.75758100 | -2.10291100 | 1.54460600  |
| H | -4.50896100 | -1.22651000 | 3.05085000  |
| H | -4.94558900 | -0.34015800 | 1.59004600  |
| C | -2.11790200 | -2.26686800 | 2.23390100  |
| H | -1.03232700 | -2.18088700 | 2.12384400  |
| H | -2.33545600 | -2.34782600 | 3.30503900  |
| H | -2.44133600 | -3.19692000 | 1.76425600  |
| C | -2.27879300 | 0.21701300  | 2.39790400  |
| H | -1.20880800 | 0.33590900  | 2.20071100  |

|          |             |             |             |
|----------|-------------|-------------|-------------|
| H        | -2.78963500 | 1.13225400  | 2.10391400  |
| H        | -2.40849800 | 0.09598400  | 3.47972100  |
| C        | -2.63432900 | 0.88551700  | -0.98462200 |
| C        | -3.68352800 | 1.82664700  | -0.81435700 |
| C        | -1.60724700 | 1.18968800  | -1.90136600 |
| C        | -3.64303400 | 3.00638000  | -1.58321900 |
| C        | -1.59943900 | 2.35791900  | -2.65755200 |
| H        | -0.78620000 | 0.49143600  | -2.02850400 |
| C        | -2.63114400 | 3.27745900  | -2.49824100 |
| H        | -4.44509800 | 3.72468500  | -1.44579200 |
| H        | -0.78907300 | 2.54254700  | -3.35574500 |
| H        | -2.64930200 | 4.19892100  | -3.07188900 |
| C        | -4.85175700 | 1.76305700  | 0.12815500  |
| C        | -4.79117400 | 2.45625900  | 1.34878300  |
| C        | -6.07620500 | 1.19381000  | -0.25267900 |
| C        | -5.89823100 | 2.51413200  | 2.19647000  |
| H        | -3.87526600 | 2.97082500  | 1.62484600  |
| C        | -7.18564600 | 1.25259400  | 0.59388600  |
| H        | -6.17290200 | 0.72364000  | -1.22413300 |
| C        | -7.09658300 | 1.90131000  | 1.82632100  |
| H        | -5.82779600 | 3.05097500  | 3.13775400  |
| H        | -8.12387800 | 0.80457800  | 0.28048000  |
| H        | -7.96029800 | 1.94925600  | 2.48228800  |
| Au       | -0.03918500 | -1.42676600 | -0.37851800 |
| H        | 5.57537600  | -2.19068800 | -0.54858300 |
| <b>9</b> |             |             |             |
| C        | 4.26080200  | 0.63599200  | -0.33441500 |
| C        | 2.93779600  | -0.13304100 | -0.10943200 |
| C        | 1.85235500  | 0.64312100  | -0.31235400 |
| C        | 2.25289500  | 2.03053900  | -0.67205000 |
| H        | 1.85046000  | 2.81464800  | -0.02744400 |
| H        | 2.09515000  | 2.28672700  | -1.72484100 |
| C        | 2.95450100  | -1.59272300 | 0.16190300  |
| C        | 3.60281700  | -2.13990500 | 1.28132000  |
| C        | 2.28826800  | -2.46181200 | -0.71968700 |
| C        | 3.57312700  | -3.51499000 | 1.51531900  |
| H        | 4.11559600  | -1.49144300 | 1.98233400  |
| C        | 2.26438600  | -3.83653100 | -0.48634500 |
| H        | 1.79981700  | -2.05110800 | -1.59796100 |
| C        | 2.90676800  | -4.36768200 | 0.63367300  |
| H        | 4.07212400  | -3.91972900 | 2.39081600  |
| H        | 1.75429700  | -4.49312500 | -1.18529100 |
| H        | 2.89239500  | -5.43811000 | 0.81552900  |
| C        | 4.80241400  | 0.18822900  | -1.70364500 |
| O        | 5.28434100  | -0.90069900 | -1.89403200 |
| O        | 4.60775400  | 1.10966100  | -2.67928000 |
| C        | 4.93733500  | 0.64837400  | -4.01705400 |

|    |             |             |             |
|----|-------------|-------------|-------------|
| H  | 4.35346600  | -0.24107400 | -4.25793700 |
| H  | 4.67749900  | 1.47208300  | -4.68064200 |
| H  | 6.00023100  | 0.40901700  | -4.08353000 |
| C  | 5.28804100  | 0.63381200  | 0.79015000  |
| C  | 6.56284300  | 0.07012800  | 0.65798600  |
| C  | 4.92177900  | 1.22298400  | 2.01185600  |
| C  | 7.45721000  | 0.10365300  | 1.73104100  |
| H  | 6.85348600  | -0.42086800 | -0.26212900 |
| C  | 5.81859600  | 1.25687100  | 3.07639300  |
| H  | 3.93130900  | 1.65167600  | 2.12769600  |
| C  | 7.09200100  | 0.69686100  | 2.93835100  |
| H  | 8.44064200  | -0.34197400 | 1.61785800  |
| H  | 5.52235300  | 1.71543400  | 4.01486100  |
| H  | 7.79025700  | 0.71930200  | 3.76933600  |
| O  | 3.73967800  | 2.03306900  | -0.42544700 |
| H  | 4.31686300  | 2.72523600  | -0.94610600 |
| Au | -0.13731100 | 0.15428400  | -0.15239200 |
| P  | -2.52280000 | -0.42203800 | 0.04225200  |
| C  | -3.38189600 | 0.97779900  | 1.01880100  |
| C  | -4.73883900 | 1.39264700  | 1.05898300  |
| C  | -2.46412300 | 1.64198400  | 1.85950000  |
| C  | -5.09131700 | 2.43470500  | 1.93966800  |
| C  | -2.84066200 | 2.66000400  | 2.73099400  |
| H  | -1.41858400 | 1.35236800  | 1.82573200  |
| C  | -4.17161700 | 3.06230800  | 2.77275400  |
| H  | -6.13023000 | 2.74881500  | 1.95890500  |
| H  | -2.09460300 | 3.13354000  | 3.36195200  |
| H  | -4.49379500 | 3.85739100  | 3.43821500  |
| C  | -3.14746900 | -0.67832500 | -1.80309500 |
| C  | -2.67756600 | -2.02722200 | 1.16692000  |
| C  | -3.22966300 | 0.72663000  | -2.42399200 |
| H  | -3.48314700 | 0.62836900  | -3.48612700 |
| H  | -3.99553500 | 1.34398900  | -1.95660400 |
| H  | -2.26987700 | 1.24975700  | -2.35575300 |
| C  | -4.47813400 | -1.43095500 | -1.93774200 |
| H  | -4.73796300 | -1.48759800 | -3.00174400 |
| H  | -4.40123700 | -2.45852200 | -1.57154900 |
| H  | -5.29979900 | -0.93888800 | -1.42241100 |
| C  | -2.05346000 | -1.46550900 | -2.55441600 |
| H  | -1.93929500 | -2.48747100 | -2.19048700 |
| H  | -2.34337400 | -1.52230300 | -3.61026700 |
| H  | -1.07998800 | -0.96909000 | -2.49854900 |
| C  | -2.08419700 | -3.22948200 | 0.41535300  |
| H  | -2.70045600 | -3.53820700 | -0.43288800 |
| H  | -1.06653800 | -3.03458300 | 0.06329900  |
| H  | -2.03570900 | -4.07966300 | 1.10580900  |
| C  | -4.12505600 | -2.31560700 | 1.58030700  |
| H  | -4.14325900 | -3.22831500 | 2.18798700  |

|           |             |             |             |
|-----------|-------------|-------------|-------------|
| H         | -4.52756300 | -1.50647800 | 2.19419500  |
| H         | -4.78875700 | -2.47185100 | 0.72728500  |
| C         | -1.83762800 | -1.76048100 | 2.42932500  |
| H         | -2.20620100 | -0.90072500 | 2.99535800  |
| H         | -1.90118200 | -2.63831600 | 3.08314500  |
| H         | -0.78265900 | -1.59543900 | 2.19034100  |
| C         | -5.89325000 | 0.89124700  | 0.23853400  |
| C         | -6.29840800 | 1.61480200  | -0.89543100 |
| C         | -6.70006100 | -0.17170400 | 0.67108600  |
| C         | -7.43393500 | 1.24311600  | -1.61642400 |
| H         | -5.72819600 | 2.48646500  | -1.20337300 |
| C         | -7.83856200 | -0.54329100 | -0.04763100 |
| H         | -6.44950700 | -0.69983400 | 1.58357700  |
| C         | -8.20221900 | 0.15456800  | -1.20025100 |
| H         | -7.72455300 | 1.81274900  | -2.49416800 |
| H         | -8.44839900 | -1.37046200 | 0.30361200  |
| H         | -9.08843100 | -0.13416800 | -1.75712900 |
| O         | 5.08271700  | 3.76065800  | -1.63947100 |
| H         | 5.76205500  | 4.23973000  | -1.14469100 |
| H         | 5.50925700  | 3.36597200  | -2.41274200 |
| <b>10</b> |             |             |             |
| C         | 3.20452500  | 1.02722400  | -0.77889800 |
| C         | 2.85864000  | -0.44909400 | -0.47099700 |
| C         | 2.21060500  | -0.96323400 | -1.58629200 |
| C         | 2.21977000  | 0.06704600  | -2.68725300 |
| H         | 1.27235200  | 0.19520200  | -3.21791900 |
| H         | 2.99946900  | -0.19400000 | -3.41866600 |
| C         | 3.43807600  | -1.23325700 | 0.64089300  |
| C         | 4.38250900  | -0.66603900 | 1.51754000  |
| C         | 3.09303800  | -2.59193300 | 0.81274300  |
| C         | 4.96589100  | -1.43313400 | 2.52658000  |
| H         | 4.67677700  | 0.37164000  | 1.41546600  |
| C         | 3.67001300  | -3.34658000 | 1.82753800  |
| H         | 2.36844400  | -3.05741700 | 0.15193800  |
| C         | 4.61034600  | -2.77100200 | 2.68951700  |
| H         | 5.69826400  | -0.97742100 | 3.18538300  |
| H         | 3.38902100  | -4.38851800 | 1.94815000  |
| H         | 5.06058200  | -3.36400300 | 3.47959000  |
| C         | 4.74456800  | 1.12999500  | -1.05658500 |
| O         | 5.49918100  | 1.88907900  | -0.49771300 |
| O         | 5.10694800  | 0.27015100  | -2.02320900 |
| C         | 6.50235300  | 0.31278900  | -2.40226400 |
| H         | 7.13396700  | 0.09914700  | -1.53784400 |
| H         | 6.61933900  | -0.45259400 | -3.16779000 |
| H         | 6.75398500  | 1.29855500  | -2.79825300 |
| C         | 2.76982400  | 2.11269900  | 0.20085100  |
| C         | 2.85488000  | 3.44644400  | -0.22832900 |

|    |             |             |             |
|----|-------------|-------------|-------------|
| C  | 2.26481600  | 1.84649200  | 1.47791000  |
| C  | 2.44250400  | 4.48608300  | 0.60124200  |
| H  | 3.24330200  | 3.66808400  | -1.21605100 |
| C  | 1.85608200  | 2.89184400  | 2.31307700  |
| H  | 2.20279500  | 0.82896000  | 1.84512300  |
| C  | 1.94259500  | 4.21263900  | 1.87832000  |
| H  | 2.52246200  | 5.51215100  | 0.25510200  |
| H  | 1.47822600  | 2.66692700  | 3.30604400  |
| H  | 1.63318600  | 5.02448700  | 2.52964300  |
| O  | 2.52709900  | 1.29115100  | -2.02190200 |
| H  | 2.26909600  | -4.81587700 | -1.93760400 |
| Au | 0.38110100  | -0.58624500 | -0.28339700 |
| P  | -1.96013600 | -0.53655000 | 0.39183500  |
| C  | -2.57995700 | 1.22324300  | -0.00686700 |
| C  | -3.89051300 | 1.69091900  | -0.28830700 |
| C  | -1.53114800 | 2.16491700  | 0.03948400  |
| C  | -4.06621000 | 3.07137300  | -0.50735200 |
| C  | -1.73641100 | 3.52614400  | -0.16641400 |
| C  | -0.51880000 | 1.83176300  | 0.24043700  |
| C  | -3.01935800 | 3.98523300  | -0.44586700 |
| H  | -5.06908800 | 3.42191200  | -0.73001100 |
| H  | -0.89226300 | 4.20593700  | -0.11476900 |
| H  | -3.20824100 | 5.04009800  | -0.61964600 |
| C  | -2.76995900 | -2.00260900 | -0.63978600 |
| C  | -2.08168400 | -0.74843400 | 2.34480500  |
| C  | -2.81877900 | -1.52318900 | -2.09963800 |
| H  | -3.18947900 | -2.34349300 | -2.72514600 |
| H  | -3.48737400 | -0.67450900 | -2.23582300 |
| H  | -1.82404600 | -1.24670900 | -2.46535200 |
| C  | -4.15936100 | -2.42407000 | -0.13996300 |
| H  | -4.53574100 | -3.21388300 | -0.80052500 |
| H  | -4.11846900 | -2.84312500 | 0.86908700  |
| H  | -4.88156500 | -1.61117100 | -0.15137500 |
| C  | -1.82267700 | -3.21710700 | -0.56032800 |
| H  | -1.72083900 | -3.61483200 | 0.45010000  |
| H  | -2.25154100 | -4.01211100 | -1.18191000 |
| H  | -0.82226900 | -2.99609700 | -0.94345700 |
| C  | -1.67564300 | -2.17729800 | 2.73631500  |
| H  | -2.40642400 | -2.92470200 | 2.41863900  |
| H  | -0.69320400 | -2.45059600 | 2.33918700  |
| H  | -1.61422000 | -2.22997300 | 3.82933900  |
| C  | -3.49142200 | -0.42783400 | 2.85585800  |
| H  | -3.51239300 | -0.58068800 | 3.94130900  |
| H  | -3.75012300 | 0.61658900  | 2.66780100  |
| H  | -4.26079100 | -1.06493100 | 2.41578900  |
| C  | -1.08492500 | 0.24767200  | 2.96092800  |
| H  | -1.30321900 | 1.28093600  | 2.67927300  |
| H  | -1.15466200 | 0.17815200  | 4.05258600  |

|                       |             |             |             |
|-----------------------|-------------|-------------|-------------|
| H                     | -0.05401000 | 0.01959100  | 2.67560800  |
| C                     | -5.15811200 | 0.89631000  | -0.42122900 |
| C                     | -5.64281400 | 0.57396900  | -1.69993800 |
| C                     | -5.97507700 | 0.62580400  | 0.68690300  |
| C                     | -6.87289400 | -0.06565100 | -1.86022300 |
| H                     | -5.05929900 | 0.84384700  | -2.57552800 |
| C                     | -7.20747800 | -0.01185900 | 0.52786700  |
| H                     | -5.65891800 | 0.93473100  | 1.67630100  |
| C                     | -7.65453400 | -0.37101500 | -0.74459900 |
| H                     | -7.22579900 | -0.31087100 | -2.85749500 |
| H                     | -7.82429900 | -0.21244500 | 1.39885700  |
| H                     | -8.61399800 | -0.86387900 | -0.86786900 |
| O                     | 1.58829900  | -4.13318000 | -1.99350600 |
| H                     | 0.99174700  | -4.43866800 | -2.68838200 |
| H                     | 2.10840000  | -2.02519200 | -1.80135000 |
| <b>H<sub>2</sub>O</b> |             |             |             |
| O                     | 0.00000000  | 0.00000000  | 0.11884900  |
| H                     | 0.00000000  | 0.76007400  | -0.47539600 |
| H                     | 0.00000000  | -0.76007400 | -0.47539600 |
| <b>4a</b>             |             |             |             |
| C                     | -4.43216900 | -0.17374300 | -0.52199900 |
| C                     | -5.31030500 | -0.77701800 | 0.54885300  |
| C                     | -4.72388700 | -1.47933600 | 1.61198100  |
| C                     | -6.70810300 | -0.72680700 | 0.44637800  |
| C                     | -5.52504000 | -2.11270500 | 2.56063300  |
| H                     | -3.64266400 | -1.51854500 | 1.70057400  |
| C                     | -7.50639400 | -1.35883100 | 1.39798200  |
| H                     | -7.18410100 | -0.19560700 | -0.37261300 |
| C                     | -6.91628500 | -2.05229300 | 2.45651400  |
| H                     | -5.06260300 | -2.64967000 | 3.38285300  |
| H                     | -8.58720100 | -1.31001500 | 1.31208700  |
| H                     | -7.53893000 | -2.54250700 | 3.19845500  |
| C                     | -5.08788200 | 0.90420700  | -1.40579200 |
| O                     | -5.12623000 | 0.72724300  | -2.62336000 |
| O                     | -5.51649700 | 1.95995500  | -0.76809800 |
| C                     | -6.04885400 | 3.04914000  | -1.57650300 |
| H                     | -5.26897000 | 3.42562100  | -2.23972900 |
| H                     | -6.89834300 | 2.69324100  | -2.16095900 |
| H                     | -6.35317600 | 3.80728000  | -0.85884800 |
| C                     | -2.98956500 | 0.22553500  | -0.16087900 |
| C                     | -2.07420400 | -0.58485800 | -0.74028800 |
| C                     | -2.72306000 | -1.59889400 | -1.60963300 |
| H                     | -2.42924900 | -1.56408600 | -2.66197800 |
| H                     | -2.67068900 | -2.62706800 | -1.24489500 |
| O                     | -4.20860100 | -1.25412400 | -1.58330300 |
| H                     | -4.49957200 | -0.72983000 | -2.41345600 |
| C                     | -2.72083600 | 1.42327700  | 0.67581900  |

|   |             |             |             |
|---|-------------|-------------|-------------|
| C | -1.64851300 | 2.26935600  | 0.33273200  |
| C | -3.50015000 | 1.76343300  | 1.79594100  |
| C | -1.34723900 | 3.39429500  | 1.09845900  |
| H | -1.06078300 | 2.04660300  | -0.55180200 |
| C | -3.19640000 | 2.89022400  | 2.56026400  |
| H | -4.33936300 | 1.14320400  | 2.08651900  |
| C | -2.11824000 | 3.70797700  | 2.21948100  |
| H | -0.51767500 | 4.03305800  | 0.80966300  |
| H | -3.80623400 | 3.12652100  | 3.42718900  |
| H | -1.88738900 | 4.58580400  | 2.81529900  |
| P | 2.40216700  | -0.81458400 | -0.16450900 |
| C | 3.05705000  | -2.37815700 | -1.15819900 |
| C | 2.62828100  | -0.94408100 | 1.78440700  |
| C | 1.53271900  | -1.89121500 | 2.31651200  |
| H | 1.65162400  | -2.91896700 | 1.97004300  |
| H | 1.60138700  | -1.90338400 | 3.41059800  |
| H | 0.52857600  | -1.54898000 | 2.04862400  |
| C | 3.99766900  | -1.46503900 | 2.24203000  |
| H | 4.82600400  | -0.85525600 | 1.88863000  |
| H | 4.02096000  | -1.45630400 | 3.33832100  |
| H | 4.16538800  | -2.49878600 | 1.92682100  |
| C | 2.34666100  | 0.46374900  | 2.33690700  |
| H | 1.35639500  | 0.82280600  | 2.03784200  |
| H | 2.36896200  | 0.42226500  | 3.43220100  |
| H | 3.09164000  | 1.19140000  | 2.01814500  |
| C | 4.58683000  | -2.42924400 | -1.23499000 |
| H | 5.06294800  | -2.45762500 | -0.25290100 |
| H | 4.88332000  | -3.33611300 | -1.77566100 |
| H | 4.98018300  | -1.57507400 | -1.79084900 |
| C | 2.51008000  | -3.65539000 | -0.50138000 |
| H | 1.42257600  | -3.62245700 | -0.38062800 |
| H | 2.74612800  | -4.50862000 | -1.14792500 |
| H | 2.96538200  | -3.85198300 | 0.47213800  |
| C | 2.48833000  | -2.26060400 | -2.58349500 |
| H | 1.39398900  | -2.26287700 | -2.58355800 |
| H | 2.83355400  | -1.35595000 | -3.09112700 |
| H | 2.83004900  | -3.12130100 | -3.17020200 |
| C | 3.21432800  | 0.70651000  | -0.98656100 |
| C | 4.46067700  | 1.34202000  | -0.74442900 |
| C | 2.40798500  | 1.20928700  | -2.02926100 |
| C | 4.82090100  | 2.43205400  | -1.56172900 |
| C | 2.79407100  | 2.27902000  | -2.83194300 |
| H | 1.44305600  | 0.74783000  | -2.21480300 |
| C | 4.01647000  | 2.89951300  | -2.59537900 |
| H | 5.77280900  | 2.91580900  | -1.36626900 |
| H | 2.13808800  | 2.62252200  | -3.62603300 |
| H | 4.34197600  | 3.73981600  | -3.20090300 |
| C | 5.47623800  | 1.03398400  | 0.31924600  |

|                          |             |             |             |
|--------------------------|-------------|-------------|-------------|
| C                        | 6.51159300  | 0.11214800  | 0.10442400  |
| C                        | 5.51439600  | 1.81749500  | 1.48464800  |
| C                        | 7.51567800  | -0.07004100 | 1.05793300  |
| H                        | 6.54644800  | -0.45142500 | -0.82045000 |
| C                        | 6.51539900  | 1.63487500  | 2.43971400  |
| H                        | 4.76322400  | 2.58761700  | 1.63412600  |
| C                        | 7.51391100  | 0.68140400  | 2.23394000  |
| H                        | 8.30751400  | -0.78982100 | 0.87256200  |
| H                        | 6.52154300  | 2.24703800  | 3.33666000  |
| H                        | 8.29612300  | 0.54049300  | 2.97360100  |
| Au                       | -0.02946400 | -0.65797400 | -0.51386900 |
| <b>TS<sub>8-4a</sub></b> |             |             |             |
| C                        | 2.08817700  | 1.09233400  | 0.24037700  |
| C                        | 2.28972800  | 2.31022500  | 0.86929600  |
| H                        | 2.24633400  | 2.39687600  | 1.95334400  |
| H                        | 2.23414400  | 3.24891600  | 0.31655800  |
| C                        | 2.99767200  | 0.20819100  | -0.16563400 |
| C                        | 2.69355900  | -1.08785200 | -0.82983200 |
| C                        | 2.12199000  | -1.09246100 | -2.11328900 |
| C                        | 2.91917800  | -2.31318500 | -0.18367100 |
| C                        | 1.78699800  | -2.29377900 | -2.73799100 |
| H                        | 1.95255700  | -0.14851900 | -2.62338100 |
| C                        | 2.57758800  | -3.51325300 | -0.80956400 |
| H                        | 3.34784300  | -2.32765000 | 0.81204700  |
| C                        | 2.01440500  | -3.50808700 | -2.08668100 |
| H                        | 1.35351400  | -2.28133100 | -3.73378300 |
| H                        | 2.75125900  | -4.45346300 | -0.29491300 |
| H                        | 1.75489700  | -4.44412400 | -2.57194000 |
| C                        | 4.47186000  | 0.70148800  | 0.08300000  |
| C                        | 5.08652800  | 1.15948100  | -1.26623500 |
| O                        | 5.44017600  | 2.31873300  | -1.40880800 |
| O                        | 5.14790500  | 0.22985300  | -2.20453200 |
| C                        | 5.72077800  | 0.63923400  | -3.47465700 |
| H                        | 5.66865000  | -0.24418200 | -4.10766000 |
| H                        | 5.14002400  | 1.46046600  | -3.89753900 |
| H                        | 6.75431200  | 0.95791400  | -3.32985900 |
| C                        | 5.32042600  | -0.32633100 | 0.84878200  |
| C                        | 5.32563200  | -0.26724400 | 2.25039900  |
| C                        | 6.06103600  | -1.32761200 | 0.20783200  |
| C                        | 6.05649600  | -1.19210900 | 2.99443700  |
| H                        | 4.77459800  | 0.51614000  | 2.75753300  |
| C                        | 6.79766100  | -2.24721400 | 0.95826000  |
| H                        | 6.06307700  | -1.40284300 | -0.87186700 |
| C                        | 6.79754800  | -2.18548900 | 2.35086900  |
| H                        | 6.05376600  | -1.12908500 | 4.07846500  |
| H                        | 7.37226400  | -3.01296700 | 0.44601900  |
| H                        | 7.37230700  | -2.90112200 | 2.93068600  |

|   |             |             |             |
|---|-------------|-------------|-------------|
| O | 4.40583000  | 1.90742500  | 0.84982900  |
| P | -2.45858600 | 0.81282400  | 0.19010400  |
| C | -2.93387900 | 0.93269700  | -1.71577200 |
| C | -3.20741600 | 2.24225400  | 1.31718900  |
| C | -2.94963000 | 3.59968300  | 0.64582900  |
| H | -3.54628800 | 3.73811700  | -0.25880000 |
| H | -3.23366600 | 4.39311500  | 1.34649300  |
| H | -1.89346100 | 3.74264800  | 0.39641400  |
| C | -4.70514800 | 2.04636500  | 1.57604800  |
| H | -4.88877500 | 1.13350000  | 2.14681300  |
| H | -5.07024200 | 2.88750600  | 2.17715400  |
| H | -5.29497700 | 2.01269900  | 0.65812800  |
| C | -2.45386600 | 2.18417400  | 2.65769700  |
| H | -1.38164900 | 2.36401700  | 2.53077200  |
| H | -2.85084000 | 2.96533600  | 3.31619000  |
| H | -2.58651100 | 1.22482400  | 3.16486900  |
| C | -4.41526600 | 1.23899300  | -1.97629800 |
| H | -4.69670400 | 2.22908300  | -1.60737100 |
| H | -4.58011600 | 1.24141700  | -3.06018400 |
| H | -5.08462400 | 0.50047000  | -1.54092200 |
| C | -2.07381400 | 2.05045500  | -2.33976900 |
| H | -1.00261500 | 1.85539000  | -2.22871400 |
| H | -2.29545300 | 2.08558800  | -3.41269400 |
| H | -2.29009000 | 3.03758700  | -1.92871000 |
| C | -2.51355200 | -0.40508300 | -2.34634000 |
| H | -1.45516800 | -0.62349800 | -2.16844400 |
| H | -3.10749200 | -1.24058300 | -1.97931900 |
| H | -2.66239900 | -0.34130000 | -3.43053200 |
| C | -2.87686100 | -0.83658300 | 1.05199700  |
| C | -4.02455000 | -1.66531100 | 0.94236600  |
| C | -1.86585300 | -1.22002000 | 1.95792300  |
| C | -4.08831700 | -2.81863000 | 1.74909600  |
| C | -1.96015300 | -2.35889600 | 2.75215200  |
| H | -0.97222500 | -0.61007500 | 2.04378000  |
| C | -3.08580500 | -3.16932300 | 2.64687300  |
| H | -4.96595700 | -3.45038100 | 1.65540500  |
| H | -1.15441400 | -2.60744900 | 3.43574800  |
| H | -3.18438500 | -4.06719300 | 3.24902000  |
| C | -5.20807200 | -1.50733500 | 0.03058000  |
| C | -5.27690300 | -2.27036500 | -1.14718100 |
| C | -6.33651700 | -0.76400000 | 0.40760400  |
| C | -6.41016900 | -2.23296600 | -1.96070800 |
| H | -4.44254400 | -2.91140300 | -1.41682500 |
| C | -7.47258100 | -0.72774900 | -0.40422500 |
| H | -6.33789600 | -0.22822400 | 1.34948600  |
| C | -7.50823600 | -1.45156300 | -1.59692700 |
| H | -6.43939800 | -2.82556700 | -2.87021200 |
| H | -8.33518200 | -0.14535400 | -0.09427700 |

|                          |             |             |             |
|--------------------------|-------------|-------------|-------------|
| H                        | -8.39245900 | -1.42456600 | -2.22628500 |
| Au                       | -0.01528400 | 1.04652700  | 0.24742100  |
| H                        | 4.87691800  | 2.57433700  | 0.29658500  |
| <b>TS<sub>9-10</sub></b> |             |             |             |
| C                        | 4.28391100  | 0.51152400  | -0.69805100 |
| C                        | 3.07326300  | -0.29839400 | -0.13576500 |
| C                        | 1.92774800  | 0.18127900  | -0.71087200 |
| C                        | 2.35127200  | 1.30415200  | -1.64800300 |
| H                        | 2.29185200  | 2.28200800  | -1.15331600 |
| H                        | 1.80194900  | 1.37459800  | -2.59184400 |
| C                        | 3.23372400  | -1.38238000 | 0.85355600  |
| C                        | 4.33180400  | -1.40685000 | 1.73537800  |
| C                        | 2.29158800  | -2.42847900 | 0.93822600  |
| C                        | 4.46265200  | -2.42296800 | 2.68251000  |
| H                        | 5.08407500  | -0.62837700 | 1.69540900  |
| C                        | 2.43256500  | -3.44590700 | 1.87656700  |
| H                        | 1.44943000  | -2.44565300 | 0.25342000  |
| C                        | 3.51716600  | -3.44469700 | 2.75900200  |
| H                        | 5.31263900  | -2.41403400 | 3.35770500  |
| H                        | 1.70100100  | -4.24777500 | 1.91453700  |
| H                        | 3.62709700  | -4.23920800 | 3.49065400  |
| C                        | 5.49439800  | -0.37664400 | -1.04990200 |
| O                        | 6.50291400  | -0.46628200 | -0.39696400 |
| O                        | 5.26478800  | -1.08417700 | -2.18003200 |
| C                        | 6.32031700  | -1.99620100 | -2.57250100 |
| H                        | 6.49678500  | -2.72408900 | -1.77898300 |
| H                        | 5.96272900  | -2.48549300 | -3.47721200 |
| H                        | 7.23882700  | -1.44034800 | -2.76755500 |
| C                        | 4.70198500  | 1.70882600  | 0.15566600  |
| C                        | 5.70190900  | 2.56418400  | -0.33253000 |
| C                        | 4.07840300  | 2.01575000  | 1.36991000  |
| C                        | 6.07449200  | 3.69708300  | 0.38484400  |
| H                        | 6.18927800  | 2.34396400  | -1.27729500 |
| C                        | 4.45572400  | 3.15208900  | 2.09111600  |
| H                        | 3.30316700  | 1.36777100  | 1.76517500  |
| C                        | 5.45263400  | 3.99349700  | 1.60133000  |
| H                        | 6.85218800  | 4.34788200  | -0.00277500 |
| H                        | 3.96814300  | 3.37422900  | 3.03546900  |
| H                        | 5.74725200  | 4.87511200  | 2.16237600  |
| O                        | 3.73553900  | 0.99760500  | -1.96362300 |
| H                        | 3.46040800  | -0.52191400 | -2.88041600 |
| Au                       | -0.06116800 | -0.13774200 | -0.28772000 |
| P                        | -2.44908200 | -0.38304900 | 0.26714900  |
| C                        | -3.23096600 | 1.35883700  | 0.18265300  |
| C                        | -4.57824000 | 1.76642100  | -0.00267200 |
| C                        | -2.26076500 | 2.36088300  | 0.39548200  |
| C                        | -4.86807900 | 3.14467000  | 0.04504900  |

|   |             |             |             |
|---|-------------|-------------|-------------|
| C | -2.57601500 | 3.71554700  | 0.45074900  |
| H | -1.22232800 | 2.07035700  | 0.52034900  |
| C | -3.89704500 | 4.11358100  | 0.27366300  |
| H | -5.89981100 | 3.44805600  | -0.10266100 |
| H | -1.79107000 | 4.44544800  | 0.62328800  |
| H | -4.17250300 | 5.16320000  | 0.30599900  |
| C | -3.17077700 | -1.69960800 | -1.00077200 |
| C | -2.57257500 | -0.93099700 | 2.15228200  |
| C | -3.27031700 | -0.97860900 | -2.35536200 |
| H | -3.57091100 | -1.70410000 | -3.12044700 |
| H | -4.01100800 | -0.18055400 | -2.34603600 |
| H | -2.30566500 | -0.55448600 | -2.65475800 |
| C | -4.51598500 | -2.31815900 | -0.59597500 |
| H | -4.82780100 | -3.01446300 | -1.38373600 |
| H | -4.43507400 | -2.89645300 | 0.32838500  |
| H | -5.30537800 | -1.57974500 | -0.47632500 |
| C | -2.12681600 | -2.82761100 | -1.13590700 |
| H | -1.99306700 | -3.39665800 | -0.21476800 |
| H | -2.47805700 | -3.52503500 | -1.90537500 |
| H | -1.15025800 | -2.44399400 | -1.44838800 |
| C | -2.04794800 | -2.36791700 | 2.30160900  |
| H | -2.71371500 | -3.10744000 | 1.84968100  |
| H | -1.04558200 | -2.48671600 | 1.87855100  |
| H | -1.98238900 | -2.60292500 | 3.37024600  |
| C | -4.00059200 | -0.82290900 | 2.69685300  |
| H | -4.00883000 | -1.16554600 | 3.73836400  |
| H | -4.34482900 | 0.21382600  | 2.69157500  |
| H | -4.71510700 | -1.43166800 | 2.13992600  |
| C | -1.65968100 | 0.02280200  | 2.94451800  |
| H | -1.98021100 | 1.06453500  | 2.85951700  |
| H | -1.70402100 | -0.25141000 | 4.00503300  |
| H | -0.61612200 | -0.04826600 | 2.62244300  |
| C | -5.78223500 | 0.91501200  | -0.29080600 |
| C | -6.24337800 | 0.79589900  | -1.61253100 |
| C | -6.57625000 | 0.38909200  | 0.73931600  |
| C | -7.42340900 | 0.10914000  | -1.90200700 |
| H | -5.68226300 | 1.26253900  | -2.41711600 |
| C | -7.75915000 | -0.29554400 | 0.45166300  |
| H | -6.28180200 | 0.53295300  | 1.77207800  |
| C | -8.18003600 | -0.44879700 | -0.87015800 |
| H | -7.75787600 | 0.02425000  | -2.93168000 |
| H | -8.35863400 | -0.69557200 | 1.26406100  |
| H | -9.10094500 | -0.97910400 | -1.09252400 |
| O | 2.69000900  | -1.19272300 | -2.98028100 |
| H | 2.08248300  | -0.91216700 | -3.68774400 |
| H | 2.23669900  | -1.04121000 | -2.05216800 |

**P<sub>4a</sub>**

|                       |             |             |             |
|-----------------------|-------------|-------------|-------------|
| C                     | 0.67969700  | -0.87280900 | -0.39576400 |
| C                     | -0.70499800 | -0.59059300 | -1.02821600 |
| C                     | -0.80646700 | -1.36056700 | -2.12281200 |
| C                     | 0.41685300  | -2.19652000 | -2.31809400 |
| H                     | 0.86952800  | -2.08197400 | -3.31342500 |
| H                     | 0.20771300  | -3.26775300 | -2.16749500 |
| C                     | -1.75511700 | 0.29089200  | -0.47389300 |
| C                     | -1.47300600 | 1.33169100  | 0.42924000  |
| C                     | -3.09817000 | 0.10094300  | -0.85685900 |
| C                     | -2.48829700 | 2.16102100  | 0.90579800  |
| H                     | -0.45648100 | 1.49587600  | 0.76114900  |
| C                     | -4.10929500 | 0.93155600  | -0.38324800 |
| H                     | -3.35568200 | -0.72100500 | -1.51722100 |
| C                     | -3.80895900 | 1.97147300  | 0.49999600  |
| H                     | -2.24081000 | 2.96020400  | 1.59882700  |
| H                     | -5.13547000 | 0.75944300  | -0.69563100 |
| H                     | -4.59724300 | 2.61857600  | 0.87370900  |
| C                     | 0.41884000  | -1.70730700 | 0.88683100  |
| O                     | 0.45814000  | -2.91448900 | 0.92687700  |
| O                     | 0.06158300  | -0.93173400 | 1.93156100  |
| C                     | -0.32603700 | -1.64119700 | 3.12159600  |
| H                     | 0.50403900  | -2.24509400 | 3.49626300  |
| H                     | -0.60037100 | -0.87350700 | 3.84457400  |
| H                     | -1.17525800 | -2.29712900 | 2.91569300  |
| C                     | 1.60219000  | 0.33288400  | -0.19964700 |
| C                     | 2.54519200  | 0.38154200  | 0.83301700  |
| C                     | 1.60124700  | 1.35453300  | -1.15913800 |
| C                     | 3.45470700  | 1.43765200  | 0.91626100  |
| H                     | 2.57471200  | -0.40452000 | 1.57986300  |
| C                     | 2.50463100  | 2.41227200  | -1.07501300 |
| H                     | 0.88597800  | 1.31658500  | -1.97518600 |
| C                     | 3.43519500  | 2.45812500  | -0.03428700 |
| H                     | 4.17972100  | 1.45900700  | 1.72493900  |
| H                     | 2.48374400  | 3.19937200  | -1.82346700 |
| H                     | 4.14064200  | 3.28142800  | 0.03268800  |
| O                     | 1.33591700  | -1.72437500 | -1.33587300 |
| H                     | -1.65912500 | -1.40828800 | -2.79041400 |
| <b>P<sub>5a</sub></b> |             |             |             |
| C                     | -1.24951200 | -1.57974100 | -1.81506800 |
| C                     | -1.79950700 | -2.37324500 | -2.69392200 |
| H                     | -1.73344300 | -2.17068500 | -3.76066600 |
| H                     | -2.33320200 | -3.27292600 | -2.39500800 |
| C                     | -0.72506500 | -0.74484600 | -0.94650800 |
| C                     | -1.57593500 | 0.36540300  | -0.40601900 |
| C                     | -2.65717900 | 0.07771000  | 0.43983400  |
| C                     | -1.35214800 | 1.69894200  | -0.78286000 |
| C                     | -3.49150100 | 1.09551000  | 0.90303800  |

|           |             |             |             |
|-----------|-------------|-------------|-------------|
| H         | -2.83773500 | -0.95217200 | 0.73115400  |
| C         | -2.18636800 | 2.71635300  | -0.31945600 |
| H         | -0.52702100 | 1.93576500  | -1.44628000 |
| C         | -3.25727700 | 2.41886300  | 0.52575500  |
| H         | -4.32569500 | 0.85384100  | 1.55600000  |
| H         | -2.00175900 | 3.74245300  | -0.62484400 |
| H         | -3.90687800 | 3.21243400  | 0.88426300  |
| C         | 0.74775300  | -0.97463100 | -0.50574500 |
| C         | 0.78162300  | -1.88329300 | 0.74884600  |
| O         | 1.51305500  | -2.85303900 | 0.81317800  |
| O         | -0.05122000 | -1.51277900 | 1.72716400  |
| C         | -0.01725300 | -2.32772600 | 2.91686400  |
| H         | -0.75765800 | -1.89295400 | 3.58704000  |
| H         | -0.27223600 | -3.36161000 | 2.67488700  |
| H         | 0.97725900  | -2.29998200 | 3.36769200  |
| C         | 1.52188100  | 0.33112900  | -0.21925800 |
| C         | 2.44484700  | 0.77732600  | -1.17390000 |
| C         | 1.33854500  | 1.08481000  | 0.94866300  |
| C         | 3.16700500  | 1.95341100  | -0.96737800 |
| H         | 2.59129500  | 0.18760000  | -2.07091800 |
| C         | 2.06873900  | 2.25611200  | 1.15644800  |
| H         | 0.62154600  | 0.76426800  | 1.69497900  |
| C         | 2.98447300  | 2.69617100  | 0.20013200  |
| H         | 3.87789800  | 2.28506400  | -1.71920000 |
| H         | 1.91662400  | 2.82597600  | 2.06884000  |
| H         | 3.55144500  | 3.60827500  | 0.36387700  |
| O         | 1.38779600  | -1.70884600 | -1.52733700 |
| H         | 1.90377000  | -2.39759500 | -1.07265600 |
| <b>II</b> |             |             |             |
| C         | 2.95145700  | -1.20606400 | -0.42197800 |
| C         | 3.19099100  | -2.65610300 | -0.04713700 |
| C         | 4.23457100  | -2.97218900 | 0.83429700  |
| C         | 2.39678200  | -3.69940500 | -0.55425300 |
| C         | 4.47704300  | -4.29753300 | 1.20007100  |
| H         | 4.87016400  | -2.18319700 | 1.21781100  |
| C         | 2.65198700  | -5.02192000 | -0.19516000 |
| H         | 1.58092800  | -3.48116300 | -1.23445700 |
| C         | 3.68958700  | -5.32787300 | 0.68805800  |
| H         | 5.29213600  | -4.52115100 | 1.88181200  |
| H         | 2.03272600  | -5.81495500 | -0.60381000 |
| H         | 3.88137300  | -6.35791400 | 0.97170700  |
| Au        | 0.82561600  | -0.75432500 | 0.02315500  |
| C         | 2.92097400  | -0.84480600 | -1.82651100 |
| O         | 3.37666400  | 0.32002400  | -2.20999900 |
| O         | 2.46975200  | -1.64780100 | -2.74428600 |
| C         | 2.40804000  | -1.18605200 | -4.12440800 |
| H         | 3.39929600  | -0.87959500 | -4.45910200 |

|   |             |             |             |
|---|-------------|-------------|-------------|
| H | 2.05636000  | -2.04828800 | -4.68608300 |
| H | 1.70393500  | -0.35583700 | -4.20184900 |
| P | -1.52977900 | -0.43962200 | 0.61419200  |
| C | -2.21611200 | 0.91377200  | -0.54593900 |
| C | -3.54542700 | 1.18514700  | -0.96301200 |
| C | -1.19180100 | 1.77590700  | -0.99115200 |
| C | -3.76484600 | 2.30321700  | -1.79280500 |
| C | -1.43835100 | 2.88185200  | -1.80004700 |
| H | -0.16707700 | 1.57213400  | -0.69701300 |
| C | -2.74198000 | 3.14940700  | -2.20670400 |
| H | -4.78317400 | 2.50042100  | -2.11267400 |
| H | -0.61434100 | 3.51908900  | -2.10608900 |
| H | -2.96406900 | 4.00070800  | -2.84283200 |
| C | -2.33154200 | -2.22965800 | 0.43029400  |
| C | -1.61516300 | 0.29964800  | 2.43427200  |
| C | -2.42670100 | -2.50089300 | -1.07993300 |
| H | -2.78311500 | -3.52643400 | -1.23045000 |
| H | -3.12491900 | -1.83058500 | -1.57912900 |
| H | -1.44890600 | -2.41424500 | -1.56576300 |
| C | -3.69544100 | -2.38337200 | 1.11761400  |
| H | -4.06614000 | -3.39594700 | 0.91963000  |
| H | -3.61539000 | -2.27934300 | 2.20307000  |
| H | -4.44098000 | -1.68060600 | 0.75264300  |
| C | -1.34780300 | -3.24678500 | 1.04305900  |
| H | -1.23027500 | -3.13120400 | 2.12118300  |
| H | -1.75092000 | -4.25036000 | 0.86426200  |
| H | -0.35713700 | -3.20014200 | 0.58238000  |
| C | -1.13002800 | -0.76166800 | 3.43386900  |
| H | -1.83491600 | -1.58974300 | 3.53926600  |
| H | -0.14969000 | -1.16771500 | 3.16520000  |
| H | -1.03399400 | -0.29148200 | 4.41921300  |
| C | -3.02916300 | 0.76965600  | 2.79501800  |
| H | -3.02423700 | 1.13673800  | 3.82813900  |
| H | -3.34222400 | 1.59796100  | 2.15548100  |
| H | -3.77333400 | -0.02561000 | 2.72730800  |
| C | -0.66408600 | 1.50767800  | 2.46913800  |
| H | -0.97095500 | 2.28771900  | 1.76735700  |
| H | -0.68737000 | 1.94175600  | 3.47529500  |
| H | 0.36999900  | 1.23134800  | 2.24526500  |
| C | -4.79508800 | 0.40522000  | -0.66860700 |
| C | -5.29582800 | -0.48622900 | -1.63203700 |
| C | -5.58286300 | 0.67595600  | 0.46028600  |
| C | -6.51229600 | -1.14227500 | -1.43838100 |
| H | -4.73586500 | -0.65161600 | -2.54797700 |
| C | -6.80208100 | 0.02258900  | 0.65370300  |
| H | -5.25420000 | 1.41448700  | 1.18214400  |
| C | -7.26457100 | -0.89751100 | -0.28831100 |
| H | -6.87745500 | -1.83241700 | -2.19306100 |

|                     |             |             |             |
|---------------------|-------------|-------------|-------------|
| H                   | -7.39645400 | 0.24531300  | 1.53484100  |
| H                   | -8.21333400 | -1.40336200 | -0.13798400 |
| C                   | 2.87068200  | 2.92582000  | 0.86750000  |
| C                   | 3.13774500  | 1.76458100  | 1.10775300  |
| C                   | 3.55446400  | 0.39406400  | 1.38479600  |
| H                   | 4.47065100  | 0.39134600  | 1.98502000  |
| H                   | 2.78796100  | -0.16576100 | 1.93177200  |
| O                   | 3.89273800  | -0.31011200 | 0.16375900  |
| H                   | 3.78672100  | 0.71392000  | -1.40147300 |
| C                   | 2.59799300  | 4.30294000  | 0.59685600  |
| C                   | 3.66357700  | 5.21634900  | 0.47234200  |
| C                   | 1.27521800  | 4.76661800  | 0.45805200  |
| C                   | 3.40717300  | 6.56011600  | 0.21382900  |
| H                   | 4.68331000  | 4.86235900  | 0.58381500  |
| C                   | 1.02885400  | 6.11260300  | 0.20005100  |
| H                   | 0.45146900  | 4.06755700  | 0.55762600  |
| C                   | 2.09188900  | 7.01118800  | 0.07728400  |
| H                   | 4.23412600  | 7.25728900  | 0.12148200  |
| H                   | 0.00619100  | 6.46332600  | 0.09903400  |
| H                   | 1.89575600  | 8.06035600  | -0.12151200 |
| TS <sub>2a-11</sub> |             |             |             |
| C                   | 2.34061800  | 1.88923800  | 0.35269000  |
| C                   | 2.23234600  | 3.36259500  | 0.00797400  |
| C                   | 3.14405100  | 3.98341200  | -0.85646200 |
| C                   | 1.19328200  | 4.13133100  | 0.56060900  |
| C                   | 3.01571200  | 5.33969100  | -1.16532300 |
| C                   | 3.96412700  | 3.41699800  | -1.28194700 |
| C                   | 1.07962100  | 5.48726800  | 0.25987200  |
| H                   | 0.47715300  | 3.66880200  | 1.23183100  |
| C                   | 1.98681100  | 6.09768000  | -0.60944500 |
| H                   | 3.73155600  | 5.80180400  | -1.83845700 |
| H                   | 0.27478600  | 6.06641100  | 0.70270800  |
| H                   | 1.89120000  | 7.15196700  | -0.84908700 |
| Au                  | 0.51963000  | 0.84135600  | -0.09613700 |
| C                   | 2.69475200  | 1.57753800  | 1.77939300  |
| O                   | 3.68033200  | 0.82966700  | 1.97108600  |
| O                   | 1.96748700  | 2.08838500  | 2.73642300  |
| C                   | 2.34782400  | 1.76516900  | 4.10362100  |
| H                   | 3.37839900  | 2.07323200  | 4.28344200  |
| H                   | 1.65643900  | 2.32778900  | 4.72684100  |
| H                   | 2.24158100  | 0.69224400  | 4.27067300  |
| P                   | -1.65213700 | -0.16657000 | -0.62716600 |
| C                   | -2.21545000 | -1.14154400 | 0.91562000  |
| C                   | -3.51333800 | -1.51444500 | 1.35290800  |
| C                   | -1.10997000 | -1.56959800 | 1.68055200  |
| C                   | -3.62129100 | -2.29174700 | 2.52339400  |
| C                   | -1.24407800 | -2.34956900 | 2.82552000  |



|   |             |             |             |
|---|-------------|-------------|-------------|
| H | -0.11189300 | -1.27975700 | 1.36791600  |
| C | -2.51635300 | -2.71486400 | 3.25404200  |
| H | -4.61758400 | -2.56702800 | 2.85472900  |
| H | -0.36005600 | -2.65834400 | 3.37515600  |
| H | -2.65260200 | -3.31683900 | 4.14717300  |
| C | -2.77851600 | 1.36215200  | -1.14601800 |
| C | -1.40467700 | -1.50220400 | -2.04916200 |
| C | -3.10101000 | 2.11896900  | 0.15294500  |
| H | -3.64673100 | 3.03486000  | -0.10197600 |
| H | -3.72664700 | 1.53732700  | 0.82804300  |
| H | -2.18950000 | 2.41224600  | 0.68415900  |
| C | -4.05620400 | 0.97745100  | -1.90448600 |
| H | -4.61797900 | 1.89410600  | -2.11915500 |
| H | -3.83053100 | 0.50761400  | -2.86574300 |
| H | -4.70629100 | 0.31552200  | -1.33653500 |
| C | -1.92432400 | 2.28503800  | -2.03989900 |
| H | -1.63472500 | 1.81841800  | -2.98249700 |
| H | -2.52757700 | 3.16718700  | -2.28349700 |
| H | -1.01943100 | 2.63283500  | -1.53241500 |
| C | -1.00415900 | -0.78795600 | -3.34915700 |
| H | -1.82595900 | -0.21203100 | -3.78116700 |
| H | -0.14749700 | -0.12183900 | -3.20510800 |
| H | -0.71499100 | -1.54454800 | -4.08758200 |
| C | -2.66124100 | -2.35225800 | -2.26744800 |
| H | -2.47174200 | -3.05653400 | -3.08624200 |
| H | -2.89506000 | -2.94052500 | -1.37730000 |
| H | -3.53690300 | -1.75837200 | -2.53479300 |
| C | -0.25370500 | -2.42005800 | -1.59984000 |
| H | -0.48950800 | -2.94336300 | -0.66897100 |
| H | -0.09062400 | -3.17850400 | -2.37448100 |
| H | 0.68325100  | -1.87159500 | -1.46380600 |
| C | -4.84138100 | -1.15958000 | 0.74696000  |
| C | -5.59525600 | -0.11136900 | 1.30059900  |
| C | -5.44011600 | -1.96248800 | -0.23537800 |
| C | -6.87999700 | 0.17171200  | 0.83477000  |
| H | -5.17746900 | 0.47421700  | 2.11446100  |
| C | -6.72701700 | -1.68245600 | -0.70029800 |
| H | -4.90887000 | -2.82303800 | -0.62484700 |
| C | -7.44593400 | -0.60724400 | -0.17595400 |
| H | -7.44248900 | 0.99118400  | 1.27207800  |
| H | -7.17190500 | -2.31548100 | -1.46233000 |
| H | -8.44697300 | -0.39148200 | -0.53656000 |
| C | 3.92570100  | -2.11034600 | -0.88709800 |
| C | 3.70750700  | -0.94521800 | -1.15392700 |
| C | 3.50930000  | 0.44638500  | -1.48768900 |
| H | 4.30221400  | 0.82943400  | -2.13570700 |
| H | 2.53685700  | 0.64493100  | -1.94456700 |
| O | 3.57469700  | 1.31252400  | -0.27932000 |

|           |                   |                    |                    |
|-----------|-------------------|--------------------|--------------------|
| H         | 3.96200300        | 0.83226800         | 0.66630200         |
| C         | 4.20768100        | -3.47412400        | -0.57664500        |
| C         | 5.53539700        | -3.94451000        | -0.61862700        |
| C         | 3.16966600        | -4.36004600        | -0.22688500        |
| C         | <b>5.81337400</b> | <b>-5.27410200</b> | <b>-0.31550600</b> |
| H         | <b>6.33439700</b> | <b>-3.26202900</b> | <b>-0.88911800</b> |
| C         | <b>3.45868800</b> | <b>-5.68761100</b> | <b>0.07463300</b>  |
| H         | <b>2.14717300</b> | <b>-3.99769800</b> | <b>-0.19730600</b> |
| C         | <b>4.77816900</b> | <b>-6.14635300</b> | <b>0.03130800</b>  |
| H         | <b>6.83781100</b> | <b>-5.63119600</b> | <b>-0.34996400</b> |
| H         | 2.65557200        | -6.36712300        | 0.34270600         |
| H         | 4.99928800        | -7.18289200        | 0.26675800         |
| <b>12</b> |                   |                    |                    |
| C         | 4.22598900        | -0.94110200        | 0.00639000         |
| C         | 3.98960400        | -2.38362400        | 0.15117100         |
| C         | 4.37238200        | -3.02449600        | 1.34728600         |
| C         | 3.40099600        | -3.16768000        | -0.86242100        |
| C         | 4.17114800        | -4.39224000        | 1.52435500         |
| H         | 4.85974600        | -2.44774200        | 2.12645800         |
| C         | 3.21506800        | -4.53713600        | -0.68144100        |
| H         | 3.10854500        | -2.70278100        | -1.79547900        |
| C         | 3.59108200        | -5.15810900        | 0.51195300         |
| H         | 4.48345900        | -4.86225000        | 2.45242200         |
| H         | 2.77318300        | -5.12404500        | -1.48211000        |
| H         | 3.44247700        | -6.22501800        | 0.64709300         |
| Au        | 0.48182400        | 0.51696200         | 0.52317500         |
| C         | 4.35496800        | -0.19963200        | -1.12506800        |
| O         | 4.71804600        | 1.10914200         | -1.09153900        |
| O         | 4.11844600        | -0.67776200        | -2.35393000        |
| C         | 5.03601300        | -0.28133900        | -3.39776800        |
| H         | 6.05507300        | -0.59071600        | -3.14639200        |
| H         | 4.69960500        | -0.80562600        | -4.29149500        |
| H         | 5.00330500        | 0.79750500         | -3.55853300        |
| P         | -1.60571600       | -0.43672500        | -0.27229000        |
| C         | -2.80554800       | -0.43355500        | 1.21175500         |
| C         | -4.22449000       | -0.44963100        | 1.23807600         |
| C         | -2.11768200       | -0.46737800        | 2.44254600         |
| C         | -4.86276400       | -0.49941700        | 2.49331600         |
| C         | -2.77340400       | -0.53058900        | 3.66836800         |
| H         | -1.03301800       | -0.44022600        | 2.44278600         |
| C         | -4.16430100       | -0.54548300        | 3.69484000         |
| H         | -5.94807400       | -0.50395500        | 2.50610400         |
| H         | -2.19678200       | -0.55892100        | 4.58762500         |
| H         | -4.70306500       | -0.58715900        | 4.63632000         |
| C         | -2.10744300       | 0.69159200         | -1.80835500        |
| C         | -1.25754500       | -2.32436700        | -0.70465400        |
| C         | -2.60090200       | 2.02306100         | -1.22059600        |

|   |             |             |             |
|---|-------------|-------------|-------------|
| H | -2.81114100 | 2.71253300  | -2.04627500 |
| H | -3.51767500 | 1.90665500  | -0.64457000 |
| H | -1.84217500 | 2.48924400  | -0.58329200 |
| C | -3.16088800 | 0.05482500  | -2.72542700 |
| H | -3.38531900 | 0.76367800  | -3.53100300 |
| H | -2.79170600 | -0.85994600 | -3.19693800 |
| H | -4.09312400 | -0.16822400 | -2.21151000 |
| C | -0.82699300 | 0.96286900  | -2.62324800 |
| H | -0.40115900 | 0.06123600  | -3.06483400 |
| H | -1.09008300 | 1.64001600  | -3.44396800 |
| H | -0.05208600 | 1.45252100  | -2.02546400 |
| C | -0.37507200 | -2.40497000 | -1.95885000 |
| H | -0.89959000 | -2.08245800 | -2.86131100 |
| H | 0.54595500  | -1.82431300 | -1.85444100 |
| H | -0.08520400 | -3.45113500 | -2.10730900 |
| C | -2.56208400 | -3.10160300 | -0.91281200 |
| H | -2.31279800 | -4.13871400 | -1.16536900 |
| H | -3.15983100 | -3.12240600 | 0.00141800  |
| H | -3.17179300 | -2.69880900 | -1.72404800 |
| C | -0.49790200 | -2.92018700 | 0.49377700  |
| H | -1.07663100 | -2.86346100 | 1.41972700  |
| H | -0.30095400 | -3.97857900 | 0.29009500  |
| H | 0.46990800  | -2.43343900 | 0.64827200  |
| C | -5.18118000 | -0.38313900 | 0.08198600  |
| C | -5.79302400 | 0.84077900  | -0.23692800 |
| C | -5.62886300 | -1.54110300 | -0.57144300 |
| C | -6.77049400 | 0.91632400  | -1.23015400 |
| H | -5.51346000 | 1.73591500  | 0.31125600  |
| C | -6.60902500 | -1.46720900 | -1.56376100 |
| H | -5.22821000 | -2.50759100 | -0.28961200 |
| C | -7.17367600 | -0.23730000 | -1.90500600 |
| H | -7.22621300 | 1.87358400  | -1.46491000 |
| H | -6.94155200 | -2.37519000 | -2.05799700 |
| H | -7.93763200 | -0.18157300 | -2.67436400 |
| C | 2.15316900  | 2.18980700  | 1.04697000  |
| C | 2.43287000  | 1.03643600  | 1.41911000  |
| C | 3.35538200  | 0.01917200  | 2.01626700  |
| H | 3.74009700  | 0.41214300  | 2.96273600  |
| H | 2.83498200  | -0.92178400 | 2.21118500  |
| O | 4.49085900  | -0.20175700 | 1.18047000  |
| H | 4.99293400  | 1.28592600  | -0.17568100 |
| C | 1.94882500  | 3.52902000  | 0.60028900  |
| C | 1.18153600  | 4.43409700  | 1.36284700  |
| C | 2.56002100  | 3.95238300  | -0.59988000 |
| C | 1.02987600  | 5.74519200  | 0.92445200  |
| H | 0.72000100  | 4.10095100  | 2.28681200  |
| C | 2.40255800  | 5.26905200  | -1.02083100 |
| H | 3.15806800  | 3.24804000  | -1.17001400 |

|                           |             |             |             |
|---------------------------|-------------|-------------|-------------|
| C                         | 1.63799800  | 6.16268700  | -0.26410300 |
| H                         | 0.44209900  | 6.44469700  | 1.51001500  |
| H                         | 2.87729600  | 5.60091100  | -1.93864700 |
| H                         | 1.51813800  | 7.18832200  | -0.59927600 |
| <b>TS<sub>11-12</sub></b> |             |             |             |
| C                         | 3.67909200  | 0.28136200  | -0.47456100 |
| C                         | 4.26022900  | -0.40194200 | 0.71325300  |
| C                         | 5.22185000  | 0.26970900  | 1.48946700  |
| C                         | 3.91252100  | -1.71597000 | 1.07350800  |
| C                         | 5.79919500  | -0.34628100 | 2.59978700  |
| H                         | 5.54455700  | 1.26420700  | 1.20249400  |
| C                         | 4.50093600  | -2.33004900 | 2.17726300  |
| H                         | 3.19045800  | -2.26216900 | 0.48018100  |
| C                         | 5.43987200  | -1.64686700 | 2.95316400  |
| H                         | 6.54222300  | 0.19147700  | 3.18117700  |
| H                         | 4.22156400  | -3.34797200 | 2.43319000  |
| H                         | 5.89119900  | -2.12595800 | 3.81628000  |
| Au                        | 1.08084300  | 0.31789400  | -0.20035400 |
| C                         | 3.54124200  | -0.31477000 | -1.73566900 |
| O                         | 3.48454300  | 0.42548100  | -2.84075200 |
| O                         | 3.52131500  | -1.62411600 | -1.90783500 |
| C                         | 3.51972600  | -2.14661500 | -3.25840400 |
| H                         | 4.39074800  | -1.78516000 | -3.80735600 |
| H                         | 3.56767900  | -3.22712300 | -3.13667400 |
| H                         | 2.60423500  | -1.85843800 | -3.77868900 |
| P                         | -0.95256300 | -1.08336200 | -0.15773000 |
| C                         | -2.00900200 | -0.46460600 | 1.31261700  |
| C                         | -3.40820500 | -0.52589900 | 1.54179100  |
| C                         | -1.19458600 | 0.07612200  | 2.32982300  |
| C                         | -3.90112300 | -0.05102600 | 2.77424100  |
| C                         | -1.70527200 | 0.52464200  | 3.54465500  |
| H                         | -0.12388300 | 0.14599900  | 2.16502500  |
| C                         | -3.07721100 | 0.46049400  | 3.77063000  |
| H                         | -4.97302300 | -0.09697400 | 2.93923600  |
| H                         | -1.03242800 | 0.91969600  | 4.29983100  |
| H                         | -3.50487500 | 0.80543200  | 4.70705700  |
| C                         | -1.73236500 | -0.83920000 | -1.95125800 |
| C                         | -0.51816800 | -2.95005600 | 0.28072200  |
| C                         | -2.30195900 | 0.58737100  | -1.98919700 |
| H                         | -2.65015700 | 0.79799800  | -3.00729000 |
| H                         | -3.14947000 | 0.71279200  | -1.31779200 |
| H                         | -1.54103000 | 1.33182000  | -1.73542400 |
| C                         | -2.79652000 | -1.87775600 | -2.33388900 |
| H                         | -3.18938800 | -1.61781700 | -3.32409500 |
| H                         | -2.37414000 | -2.88349400 | -2.41224100 |
| H                         | -3.63655900 | -1.90345600 | -1.64279400 |
| C                         | -0.57502000 | -0.91569400 | -2.96732600 |

|           |             |             |             |
|-----------|-------------|-------------|-------------|
| H         | -0.09420700 | -1.89522000 | -2.98988600 |
| H         | -0.98821800 | -0.72778700 | -3.96515000 |
| H         | 0.18831600  | -0.15577100 | -2.77327700 |
| C         | 0.34700800  | -3.53550000 | -0.84551200 |
| H         | -0.22242100 | -3.69518600 | -1.76474000 |
| H         | 1.21166100  | -2.90316800 | -1.06952000 |
| H         | 0.72286500  | -4.51391300 | -0.52444200 |
| C         | -1.77058600 | -3.80783000 | 0.49723900  |
| H         | -1.45769500 | -4.83683000 | 0.71113700  |
| H         | -2.34036800 | -3.45569600 | 1.35924600  |
| H         | -2.43006000 | -3.83499300 | -0.37166200 |
| C         | 0.29058200  | -2.91932500 | 1.58844800  |
| H         | -0.29772400 | -2.53522500 | 2.42542900  |
| H         | 0.58806700  | -3.94470800 | 1.83758700  |
| H         | 1.19750000  | -2.31684600 | 1.49886100  |
| C         | -4.48723000 | -1.00726400 | 0.61347000  |
| C         | -5.21823600 | -0.07389300 | -0.14030100 |
| C         | -4.91978500 | -2.34182800 | 0.61692000  |
| C         | -6.30082600 | -0.47464700 | -0.92453000 |
| H         | -4.94683500 | 0.97692000  | -0.09525600 |
| C         | -6.00491400 | -2.74423400 | -0.16502700 |
| H         | -4.42210400 | -3.06761400 | 1.24925900  |
| C         | -6.69084400 | -1.81470500 | -0.94802900 |
| H         | -6.84760700 | 0.26292000  | -1.50445600 |
| H         | -6.32196100 | -3.78275000 | -0.14873200 |
| H         | -7.53562900 | -2.12776100 | -1.55386100 |
| C         | 0.73252000  | 3.11451300  | -0.01173600 |
| C         | 1.80836100  | 2.49585900  | 0.00167100  |
| C         | 3.28389100  | 2.56054000  | 0.19365000  |
| H         | 3.66199100  | 3.55030700  | -0.07454400 |
| H         | 3.51944200  | 2.36539200  | 1.24603200  |
| O         | 3.99121600  | 1.64435700  | -0.64564200 |
| H         | 3.66301500  | 1.34351800  | -2.55238300 |
| C         | -0.50199900 | 3.80845800  | -0.06218100 |
| C         | -1.33451100 | 3.88068900  | 1.07711800  |
| C         | -0.89041200 | 4.46832200  | -1.25051800 |
| C         | -2.52427900 | 4.59783500  | 1.02199700  |
| H         | -1.03908700 | 3.36924200  | 1.98672100  |
| C         | -2.08313000 | 5.18175700  | -1.29186200 |
| H         | -0.24575900 | 4.41804800  | -2.12204200 |
| C         | -2.89942000 | 5.24857500  | -0.15813500 |
| H         | -3.16047300 | 4.65400100  | 1.89956100  |
| H         | -2.37604000 | 5.69094400  | -2.20448900 |
| H         | -3.82770200 | 5.81062800  | -0.19353800 |
| <b>13</b> |             |             |             |
| C         | -4.40913900 | -0.53322000 | -0.33531800 |
| C         | -5.31047000 | -0.56611400 | 0.90422200  |

|   |             |             |             |
|---|-------------|-------------|-------------|
| C | -5.52831600 | -1.79197900 | 1.54674800  |
| C | -5.89765700 | 0.59678400  | 1.42345700  |
| C | -6.31557700 | -1.85096700 | 2.69668300  |
| H | -5.09103300 | -2.69591500 | 1.14069900  |
| C | -6.68759400 | 0.52903600  | 2.57201700  |
| H | -5.73449300 | 1.55749900  | 0.95009200  |
| C | -6.89873000 | -0.69261500 | 3.21203500  |
| H | -6.47644200 | -2.80701700 | 3.18530600  |
| H | -7.13650000 | 1.43600700  | 2.96519400  |
| H | -7.51503100 | -0.74185600 | 4.10433100  |
| C | -5.07907300 | 0.18121900  | -1.50538600 |
| O | -5.26759600 | -0.50517000 | -2.57486000 |
| O | -5.40310700 | 1.41689400  | -1.45806800 |
| C | -6.00032400 | 2.05651500  | -2.63788800 |
| H | -5.30130100 | 1.98974200  | -3.47150600 |
| H | -6.93992400 | 1.55756000  | -2.87535200 |
| H | -6.16132100 | 3.08753500  | -2.33487100 |
| C | -2.96726700 | 0.03322200  | -0.16652800 |
| C | -2.06401100 | -0.90648300 | -0.50922700 |
| C | -2.77083100 | -2.15359800 | -0.93006300 |
| H | -2.53858600 | -2.46884300 | -1.95384000 |
| H | -2.58394800 | -2.99871600 | -0.25886600 |
| O | -4.21509900 | -1.85234900 | -0.86944000 |
| H | -4.91687200 | -1.41640400 | -2.28751500 |
| C | -2.70874700 | 1.41941700  | 0.30127500  |
| C | -2.28094500 | 2.40037000  | -0.60922700 |
| C | -2.85077000 | 1.77310300  | 1.65352200  |
| C | -2.00506000 | 3.69974800  | -0.18279900 |
| H | -2.15011000 | 2.13294800  | -1.65460200 |
| C | -2.57406100 | 3.07332200  | 2.07914000  |
| H | -3.16281400 | 1.02390400  | 2.37335100  |
| C | -2.15436100 | 4.04000400  | 1.16320500  |
| H | -1.66933500 | 4.44411800  | -0.89897400 |
| H | -2.67986800 | 3.32852000  | 3.12937400  |
| H | -1.93881000 | 5.05041600  | 1.49735000  |
| P | 2.44003800  | -0.80436000 | -0.21974000 |
| C | 3.15780600  | -2.04836600 | -1.56144900 |
| C | 2.82013900  | -1.32468100 | 1.63732500  |
| C | 1.84646100  | -2.46390700 | 2.00573800  |
| H | 2.01844900  | -3.37518200 | 1.43072500  |
| H | 1.99992200  | -2.70879700 | 3.06326100  |
| H | 0.80086300  | -2.16770000 | 1.87901500  |
| C | 4.25688200  | -1.79943000 | 1.89667800  |
| H | 5.00512000  | -1.04597400 | 1.66052600  |
| H | 4.35342200  | -2.04043600 | 2.96220600  |
| H | 4.49148300  | -2.71160400 | 1.34049400  |
| C | 2.46769500  | -0.10182200 | 2.50112200  |
| H | 1.43604400  | 0.22430800  | 2.33282100  |

|                            |             |             |             |
|----------------------------|-------------|-------------|-------------|
| H                          | 2.56301900  | -0.37820200 | 3.55772100  |
| H                          | 3.13287900  | 0.74068100  | 2.31764700  |
| C                          | 4.67607400  | -1.92169400 | -1.72519500 |
| H                          | 5.21928500  | -2.11138100 | -0.79769700 |
| H                          | 5.01528000  | -2.65330200 | -2.46840000 |
| H                          | 4.94850200  | -0.92997100 | -2.09350700 |
| C                          | 2.77829300  | -3.48543500 | -1.17139400 |
| H                          | 1.70340500  | -3.59313600 | -0.99495500 |
| H                          | 3.04709600  | -4.15405400 | -1.99753900 |
| H                          | 3.31591700  | -3.83278600 | -0.28602100 |
| C                          | 2.47831000  | -1.69345200 | -2.89666400 |
| H                          | 1.39169100  | -1.81370000 | -2.84341800 |
| H                          | 2.69896800  | -0.66983800 | -3.21155400 |
| H                          | 2.85708600  | -2.36842000 | -3.67331100 |
| C                          | 3.06788800  | 0.92351700  | -0.74004900 |
| C                          | 4.27760100  | 1.60574600  | -0.44437800 |
| C                          | 2.15018900  | 1.55217700  | -1.60718900 |
| C                          | 4.49731300  | 2.86122600  | -1.04504200 |
| C                          | 2.39774000  | 2.78787300  | -2.19813200 |
| H                          | 1.20785500  | 1.05776400  | -1.82081500 |
| C                          | 3.58730100  | 3.45109600  | -1.91575700 |
| H                          | 5.42243500  | 3.37812700  | -0.80969400 |
| H                          | 1.66031600  | 3.22466100  | -2.86470100 |
| H                          | 3.80614600  | 4.41818000  | -2.35817100 |
| C                          | 5.38341300  | 1.18820300  | 0.48356900  |
| C                          | 6.48128200  | 0.43987200  | 0.03334600  |
| C                          | 5.42617400  | 1.71326900  | 1.78588400  |
| C                          | 7.55627100  | 0.16575900  | 0.88185700  |
| H                          | 6.50731900  | 0.08579100  | -0.99043900 |
| C                          | 6.49832500  | 1.43835700  | 2.63583400  |
| H                          | 4.62042300  | 2.35631800  | 2.12795700  |
| C                          | 7.56272600  | 0.65336900  | 2.18946400  |
| H                          | 8.39523600  | -0.41738700 | 0.51366800  |
| H                          | 6.50693800  | 1.84919400  | 3.64107000  |
| H                          | 8.39959900  | 0.44135000  | 2.84789100  |
| Au                         | -0.01559700 | -0.82519300 | -0.40618400 |
| <b>TS</b> <sub>12-13</sub> |             |             |             |
| C                          | -4.77290500 | -0.47859900 | -0.86209500 |
| C                          | -5.26181000 | -1.17043900 | 0.34004400  |
| C                          | -5.30405500 | -2.57865400 | 0.33385600  |
| C                          | -5.70084700 | -0.48949500 | 1.49270600  |
| C                          | -5.75443800 | -3.28210500 | 1.44840000  |
| H                          | -5.01515100 | -3.11584600 | -0.56308500 |
| C                          | -6.15368700 | -1.20222900 | 2.60140900  |
| H                          | -5.69156400 | 0.59213000  | 1.51899100  |
| C                          | -6.17806200 | -2.59829300 | 2.58943200  |
| H                          | -5.78684900 | -4.36712000 | 1.41930100  |

|   |             |             |             |
|---|-------------|-------------|-------------|
| H | -6.49218200 | -0.66099000 | 3.48005700  |
| H | -6.53350300 | -3.14710200 | 3.45598000  |
| C | -5.15908900 | 0.77682800  | -1.33237400 |
| O | -4.82981800 | 1.19133800  | -2.55414600 |
| O | -5.87831600 | 1.60869400  | -0.60814600 |
| C | -6.35826400 | 2.83246500  | -1.21653100 |
| H | -5.52953800 | 3.42232700  | -1.60913000 |
| H | -7.06429600 | 2.60050700  | -2.01641800 |
| H | -6.85731400 | 3.36320700  | -0.40831500 |
| C | -2.64778500 | 0.50825600  | -0.21829200 |
| C | -2.05138000 | -0.47759400 | -0.78690700 |
| C | -2.75464000 | -1.58853000 | -1.50250000 |
| H | -2.28594300 | -1.86081200 | -2.44974100 |
| H | -2.77708500 | -2.47482400 | -0.85690600 |
| O | -4.11573800 | -1.19577700 | -1.83860900 |
| H | -4.37667900 | 0.43734800  | -2.97817500 |
| C | -2.79480400 | 1.66824300  | 0.58550000  |
| C | -2.80848500 | 2.95509600  | -0.00275700 |
| C | -2.94707700 | 1.54779500  | 1.98711100  |
| C | -2.94409900 | 4.08583000  | 0.79418700  |
| H | -2.69825400 | 3.04489100  | -1.07894400 |
| C | -3.08778300 | 2.68734900  | 2.77268900  |
| H | -2.94765700 | 0.56067600  | 2.43602800  |
| C | -3.08399200 | 3.95421200  | 2.18080300  |
| H | -2.93722000 | 5.07213900  | 0.34060000  |
| H | -3.19481900 | 2.59079200  | 3.84853600  |
| H | -3.18722200 | 4.84022200  | 2.79981500  |
| P | 2.44156100  | -0.79605900 | -0.16463800 |
| C | 3.11290400  | -2.36095400 | -1.14507700 |
| C | 2.61942900  | -0.92058500 | 1.78862700  |
| C | 1.53034400  | -1.88704600 | 2.29848400  |
| H | 1.69349300  | -2.91720400 | 1.97931600  |
| H | 1.55847000  | -1.87435000 | 3.39409300  |
| H | 0.52612500  | -1.58252600 | 1.98829300  |
| C | 3.98773100  | -1.41841200 | 2.27527700  |
| H | 4.80939400  | -0.78336700 | 1.95311400  |
| H | 3.97970600  | -1.42444600 | 3.37172600  |
| H | 4.18772600  | -2.44432400 | 1.95196000  |
| C | 2.30749300  | 0.48375800  | 2.33360800  |
| H | 1.32317900  | 0.83323500  | 2.00402000  |
| H | 2.29679900  | 0.43932100  | 3.42888200  |
| H | 3.05525100  | 1.21930900  | 2.03944600  |
| C | 4.64546500  | -2.38622500 | -1.19957700 |
| H | 5.10597300  | -2.43270100 | -0.21086600 |
| H | 4.96332200  | -3.27345900 | -1.75974300 |
| H | 5.03343400  | -1.51041800 | -1.72399600 |
| C | 2.57718400  | -3.64248400 | -0.48806600 |
| H | 1.48690800  | -3.63433500 | -0.39227100 |

|                           |             |             |             |
|---------------------------|-------------|-------------|-------------|
| H                         | 2.84705200  | -4.49552500 | -1.12113500 |
| H                         | 3.01374100  | -3.81940000 | 0.49762800  |
| C                         | 2.56085200  | -2.25424100 | -2.57841600 |
| H                         | 1.46631300  | -2.25417800 | -2.59559300 |
| H                         | 2.91539300  | -1.35642800 | -3.09206100 |
| H                         | 2.90717800  | -3.12177400 | -3.15185200 |
| C                         | 3.26174300  | 0.71817100  | -0.99098300 |
| C                         | 4.49669700  | 1.36509500  | -0.72359800 |
| C                         | 2.48393300  | 1.19580700  | -2.06645200 |
| C                         | 4.87494700  | 2.44206100  | -1.55002800 |
| C                         | 2.88823900  | 2.25248200  | -2.87677700 |
| H                         | 1.52909700  | 0.72416600  | -2.27498600 |
| C                         | 4.09917300  | 2.88525000  | -2.61545500 |
| H                         | 5.81794800  | 2.93483100  | -1.33523900 |
| H                         | 2.25503600  | 2.57627800  | -3.69702200 |
| H                         | 4.43739200  | 3.71666000  | -3.22619500 |
| C                         | 5.48095800  | 1.08350400  | 0.37590900  |
| C                         | 6.52793800  | 0.16429300  | 0.21173000  |
| C                         | 5.47503600  | 1.88696700  | 1.52827700  |
| C                         | 7.49956100  | 0.00374900  | 1.20218200  |
| H                         | 6.59768000  | -0.41447600 | -0.70181200 |
| C                         | 6.44351000  | 1.72572000  | 2.51988300  |
| H                         | 4.71491600  | 2.65489000  | 1.63911900  |
| C                         | 7.45352400  | 0.77474800  | 2.36460600  |
| H                         | 8.30059700  | -0.71485600 | 1.05629300  |
| H                         | 6.41585400  | 2.35276100  | 3.40607500  |
| H                         | 8.21002800  | 0.65016300  | 3.13329500  |
| Au                        | 0.03182400  | -0.60011800 | -0.53968800 |
| <b>TS<sub>13-4a</sub></b> |             |             |             |
| C                         | -4.41960600 | -0.19969800 | -0.52290400 |
| C                         | -5.30443900 | -0.80606000 | 0.54773200  |
| C                         | -4.71861100 | -1.50945100 | 1.60909700  |
| C                         | -6.70108400 | -0.76482800 | 0.43939600  |
| C                         | -5.52038200 | -2.15368300 | 2.55017200  |
| H                         | -3.63750400 | -1.54220000 | 1.70129800  |
| C                         | -7.50101400 | -1.40644000 | 1.38395700  |
| H                         | -7.17877300 | -0.23658700 | -0.38160900 |
| C                         | -6.91159600 | -2.10189100 | 2.44108100  |
| H                         | -5.05784200 | -2.69284800 | 3.37095600  |
| H                         | -8.58170800 | -1.36475300 | 1.29227300  |
| H                         | -7.53422300 | -2.60069700 | 3.17724300  |
| C                         | -5.07022900 | 0.89771900  | -1.37000600 |
| O                         | -5.07585400 | 0.67357900  | -2.60972000 |
| O                         | -5.51215800 | 1.97210700  | -0.81899900 |
| C                         | -6.01666000 | 3.03938100  | -1.68592100 |
| H                         | -5.20807600 | 3.38951200  | -2.32806900 |
| H                         | -6.84532500 | 2.65882700  | -2.28365600 |

|   |             |             |             |
|---|-------------|-------------|-------------|
| H | -6.34357300 | 3.81784400  | -1.00152500 |
| C | -2.98704000 | 0.24080300  | -0.14369600 |
| C | -2.07086100 | -0.55386700 | -0.74599900 |
| C | -2.74802700 | -1.54636500 | -1.63092500 |
| H | -2.43691800 | -1.49783400 | -2.67906300 |
| H | -2.66794200 | -2.58115700 | -1.28519200 |
| O | -4.19791800 | -1.19986500 | -1.59835200 |
| H | -4.59722400 | -0.41193300 | -2.49119300 |
| C | -2.74252000 | 1.42521900  | 0.71623400  |
| C | -1.65530900 | 2.27262300  | 0.42468000  |
| C | -3.56403700 | 1.75859600  | 1.80853000  |
| C | -1.38107500 | 3.38851100  | 1.21293700  |
| H | -1.03202400 | 2.05515800  | -0.43654600 |
| C | -3.28824900 | 2.87768700  | 2.59491000  |
| H | -4.41415300 | 1.13652900  | 2.06113900  |
| C | -2.19512000 | 3.69503100  | 2.30546700  |
| H | -0.53781300 | 4.02636000  | 0.96435100  |
| H | -3.93112000 | 3.10711200  | 3.43960000  |
| H | -1.98494700 | 4.56600200  | 2.91874400  |
| P | 2.40306300  | -0.80936200 | -0.17339800 |
| C | 3.05014100  | -2.36649400 | -1.18226700 |
| C | 2.63118600  | -0.95965000 | 1.77337500  |
| C | 1.53084400  | -1.90589100 | 2.29739700  |
| H | 1.64214600  | -2.93030500 | 1.93883600  |
| H | 1.60215200  | -1.93109700 | 3.39113100  |
| H | 0.52833600  | -1.55422700 | 2.03584900  |
| C | 3.99817900  | -1.49271800 | 2.22393300  |
| H | 4.82922600  | -0.88405600 | 1.87498300  |
| H | 4.02345100  | -1.49523300 | 3.32024000  |
| H | 4.15956000  | -2.52406900 | 1.89780600  |
| C | 2.35761300  | 0.44383600  | 2.34080800  |
| H | 1.36971000  | 0.81152600  | 2.04433100  |
| H | 2.37847100  | 0.39045900  | 3.43563200  |
| H | 3.10721400  | 1.17048800  | 2.03064900  |
| C | 4.57956500  | -2.42444700 | -1.26105500 |
| H | 5.05641000  | -2.46694300 | -0.27977200 |
| H | 4.87113700  | -3.32633000 | -1.81269200 |
| H | 4.97672600  | -1.56566500 | -1.80706000 |
| C | 2.49735400  | -3.64721900 | -0.53709900 |
| H | 1.41022000  | -3.60977200 | -0.41471000 |
| H | 2.72810500  | -4.49540800 | -1.19215900 |
| H | 2.95303300  | -3.85547400 | 0.43385600  |
| C | 2.48054100  | -2.23282400 | -2.60585900 |
| H | 1.38625600  | -2.22936800 | -2.60487900 |
| H | 2.83027200  | -1.32539100 | -3.10546400 |
| H | 2.81719600  | -3.08991500 | -3.20075000 |
| C | 3.22545900  | 0.71485400  | -0.98007800 |
| C | 4.47507800  | 1.34173200  | -0.73214600 |

|                           |             |             |             |
|---------------------------|-------------|-------------|-------------|
| C                         | 2.42163600  | 1.23225000  | -2.01758100 |
| C                         | 4.84070200  | 2.43814000  | -1.53848800 |
| C                         | 2.81306700  | 2.30789500  | -2.80973200 |
| H                         | 1.45423600  | 0.77752500  | -2.20693600 |
| C                         | 4.03853900  | 2.91996100  | -2.56728300 |
| H                         | 5.79510300  | 2.91508700  | -1.33842100 |
| H                         | 2.15878700  | 2.66243700  | -3.60040300 |
| H                         | 4.36827000  | 3.76461900  | -3.16443700 |
| C                         | 5.48970200  | 1.01789600  | 0.32779300  |
| C                         | 6.52015900  | 0.09291800  | 0.10317000  |
| C                         | 5.53245400  | 1.78925300  | 1.50107500  |
| C                         | 7.52370800  | -0.10411500 | 1.05428200  |
| H                         | 6.55123700  | -0.46178800 | -0.82717300 |
| C                         | 6.53285700  | 1.59177800  | 2.45378800  |
| H                         | 4.78522500  | 2.56155800  | 1.65879800  |
| C                         | 7.52635600  | 0.63531800  | 2.23788100  |
| H                         | 8.31158400  | -0.82624700 | 0.86130400  |
| H                         | 6.54242200  | 2.19461200  | 3.35701200  |
| H                         | 8.30803700  | 0.48269000  | 2.97578600  |
| Au                        | -0.02948800 | -0.63404800 | -0.51927200 |
| <b>TS<sub>1a-14</sub></b> |             |             |             |
| C                         | -2.07541300 | -0.72100400 | 0.29140900  |
| C                         | -2.58361300 | -1.69788100 | -0.66347500 |
| C                         | -3.56886500 | -2.66282100 | -0.32576500 |
| C                         | -2.07746200 | -1.69943000 | -1.98729000 |
| C                         | -4.00038700 | -3.59068100 | -1.26679500 |
| H                         | -3.97465100 | -2.68253600 | 0.67726500  |
| C                         | -2.53057800 | -2.61279900 | -2.92934800 |
| H                         | -1.31912900 | -0.97001000 | -2.25374300 |
| C                         | -3.49088400 | -3.56540900 | -2.56976300 |
| H                         | -4.74285700 | -4.33196800 | -0.98829400 |
| H                         | -2.13170200 | -2.59522400 | -3.93869100 |
| H                         | -3.84041000 | -4.28663900 | -3.30263900 |
| Au                        | -0.10797700 | -0.03836300 | 0.10713700  |
| C                         | -2.36558000 | -0.91048100 | 1.75606500  |
| O                         | -2.25098100 | -2.00263000 | 2.27944000  |
| O                         | -2.58426100 | 0.22115400  | 2.45666800  |
| C                         | -2.68696100 | 0.03192300  | 3.88567000  |
| H                         | -1.74530800 | -0.34529400 | 4.29015400  |
| H                         | -2.90960200 | 1.01769400  | 4.29268200  |
| H                         | -3.48367200 | -0.67665600 | 4.12295700  |
| P                         | 2.22981400  | 0.74492800  | 0.08912900  |
| C                         | 3.63929800  | -0.51209800 | 0.07555000  |
| C                         | 3.46493700  | -1.91064900 | -0.04325700 |
| C                         | 4.95020000  | 0.00256000  | 0.09448800  |
| C                         | 4.61282400  | -2.72063700 | -0.14951200 |
| C                         | 6.07029800  | -0.81860800 | -0.00041900 |

|   |             |             |             |
|---|-------------|-------------|-------------|
| H | 5.11045000  | 1.06766100  | 0.17800300  |
| C | 5.89967700  | -2.19492300 | -0.12797700 |
| H | 4.47243500  | -3.79347400 | -0.23589700 |
| H | 7.06341900  | -0.38078600 | 0.02059500  |
| H | 6.75819700  | -2.85477800 | -0.20651600 |
| C | 2.48214300  | 1.79422900  | -1.56149000 |
| C | 2.41659900  | 1.77382100  | 1.75809300  |
| C | 2.66751900  | 0.75923200  | -2.68588600 |
| H | 2.69538300  | 1.28447200  | -3.64763600 |
| H | 3.60008800  | 0.19988400  | -2.58206200 |
| H | 1.83922600  | 0.04353100  | -2.71946700 |
| C | 3.67283800  | 2.76384200  | -1.53995300 |
| H | 3.70646000  | 3.28911000  | -2.50213300 |
| H | 3.57795000  | 3.52610300  | -0.76200100 |
| H | 4.63153400  | 2.25573700  | -1.42462800 |
| C | 1.19301600  | 2.59100900  | -1.82099500 |
| H | 1.01450100  | 3.36479100  | -1.07132300 |
| H | 1.27970200  | 3.08933100  | -2.79375800 |
| H | 0.31366400  | 1.94189300  | -1.85206400 |
| C | 1.41302000  | 2.93721100  | 1.71115900  |
| H | 1.71566700  | 3.71308300  | 1.00245000  |
| H | 0.40570900  | 2.60041900  | 1.44884100  |
| H | 1.36632500  | 3.40198700  | 2.70319000  |
| C | 3.82252000  | 2.32010100  | 2.05051100  |
| H | 3.76812300  | 2.92604000  | 2.96273300  |
| H | 4.54344600  | 1.52246400  | 2.23715100  |
| H | 4.20618800  | 2.96541600  | 1.25732000  |
| C | 2.02691900  | 0.79623000  | 2.88283400  |
| H | 2.69870800  | -0.06691700 | 2.92033500  |
| H | 2.10119800  | 1.31518700  | 3.84580800  |
| H | 1.00038200  | 0.43425000  | 2.77114500  |
| C | 2.16792900  | -2.65243900 | -0.06555700 |
| C | 1.39300300  | -2.80629400 | 1.09511000  |
| C | 1.80187900  | -3.36441900 | -1.21917800 |
| C | 0.28239700  | -3.65322100 | 1.10252600  |
| H | 1.68654500  | -2.29470200 | 2.00683100  |
| C | 0.68661400  | -4.20356600 | -1.21400200 |
| H | 2.40870900  | -3.27313700 | -2.11575500 |
| C | -0.07202500 | -4.35346200 | -0.05170100 |
| H | -0.30654600 | -3.76003900 | 2.00641000  |
| H | 0.42218300  | -4.75256100 | -2.11305700 |
| H | -0.93166600 | -5.01624000 | -0.04249300 |
| C | -3.12341400 | 1.86298700  | -0.35801400 |
| C | -3.70127400 | 0.80476200  | -0.08302500 |
| C | -5.02250600 | 0.12244900  | 0.07771200  |
| H | -5.80371200 | 0.87390600  | -0.10174600 |
| H | -5.12134400 | -0.65007200 | -0.68962300 |
| O | -5.19698200 | -0.52945400 | 1.31769600  |

|           |             |             |             |
|-----------|-------------|-------------|-------------|
| H         | -5.16123800 | 0.13788900  | 2.01594400  |
| C         | -2.49575200 | 3.08696000  | -0.66318200 |
| C         | -2.13187500 | 3.97866800  | 0.37361600  |
| C         | -2.32176800 | 3.47752900  | -2.01204100 |
| C         | -1.60508300 | 5.22622100  | 0.06184500  |
| H         | -2.28163200 | 3.67897700  | 1.40539100  |
| C         | -1.80252500 | 4.73184100  | -2.30957500 |
| H         | -2.61568300 | 2.79649500  | -2.80392600 |
| C         | -1.44373000 | 5.60493400  | -1.27629900 |
| H         | -1.33262700 | 5.91258900  | 0.85723900  |
| H         | -1.68244600 | 5.03585200  | -3.34444600 |
| H         | -1.04484400 | 6.58638300  | -1.51423800 |
| <b>14</b> |             |             |             |
| C         | -2.92588700 | -0.84951900 | 0.63487800  |
| C         | -3.22123900 | -1.94988800 | -0.31977400 |
| C         | -2.99211300 | -3.30860800 | -0.00613000 |
| C         | -3.79167600 | -1.64352200 | -1.57741600 |
| C         | -3.34210000 | -4.31098800 | -0.90803600 |
| H         | -2.55471000 | -3.57317000 | 0.94747800  |
| C         | -4.13076800 | -2.64903900 | -2.47387500 |
| H         | -3.95832100 | -0.60719200 | -1.85146100 |
| C         | -3.90922300 | -3.99051300 | -2.14270700 |
| H         | -3.17232100 | -5.34937900 | -0.64072900 |
| H         | -4.57255300 | -2.38984100 | -3.43108700 |
| H         | -4.17909400 | -4.77633400 | -2.84132400 |
| Au        | -0.86964600 | -0.11118600 | 0.02412200  |
| C         | -2.63935300 | -1.21661500 | 2.08309000  |
| O         | -1.85270400 | -2.07259500 | 2.44455900  |
| O         | -3.36462200 | -0.47043200 | 2.92609400  |
| C         | -3.16386900 | -0.72795600 | 4.33636200  |
| H         | -2.12857300 | -0.51666900 | 4.61158900  |
| H         | -3.84712400 | -0.05485200 | 4.85092900  |
| H         | -3.39594800 | -1.76935700 | 4.56591800  |
| P         | 1.58638100  | -0.44953900 | -0.46960900 |
| C         | 2.51419500  | 1.14676400  | 0.01285200  |
| C         | 3.87994300  | 1.35253600  | 0.34489500  |
| C         | 1.66539100  | 2.27129700  | -0.02550200 |
| C         | 4.30478100  | 2.66909900  | 0.61171100  |
| C         | 2.11412100  | 3.56372900  | 0.23117700  |
| H         | 0.61707400  | 2.13746800  | -0.26397700 |
| C         | 3.45146300  | 3.76594400  | 0.55466200  |
| H         | 5.34839400  | 2.81804400  | 0.87017200  |
| H         | 1.41472000  | 4.39206500  | 0.18422800  |
| H         | 3.83025200  | 4.76109300  | 0.76633600  |
| C         | 2.07342100  | -2.06584300 | 0.55079100  |
| C         | 1.76188800  | -0.63505900 | -2.41902600 |
| C         | 2.16462000  | -1.63256700 | 2.02285000  |

|   |             |             |             |
|---|-------------|-------------|-------------|
| H | 2.33830200  | -2.52384100 | 2.63667900  |
| H | 2.98452000  | -0.93972600 | 2.20438800  |
| H | 1.23129400  | -1.17564000 | 2.36676500  |
| C | 3.37007200  | -2.73395300 | 0.07319800  |
| H | 3.57299400  | -3.59006900 | 0.72748800  |
| H | 3.27613800  | -3.12484900 | -0.94387200 |
| H | 4.23286300  | -2.07324200 | 0.11654900  |
| C | 0.90990600  | -3.06751700 | 0.41796900  |
| H | 0.73519100  | -3.38994900 | -0.60948900 |
| H | 1.17062700  | -3.95886400 | 1.00066900  |
| H | -0.02146600 | -2.67550500 | 0.83494600  |
| C | 1.09169600  | -1.94426900 | -2.86294400 |
| H | 1.64753700  | -2.82785300 | -2.54077800 |
| H | 0.06188300  | -2.02537600 | -2.50078700 |
| H | 1.05789800  | -1.96343700 | -3.95828800 |
| C | 3.22539100  | -0.59880500 | -2.87311200 |
| H | 3.25995200  | -0.73010000 | -3.96114900 |
| H | 3.68355800  | 0.36593600  | -2.64503300 |
| H | 3.82903600  | -1.38888800 | -2.42320800 |
| C | 1.01330500  | 0.55511200  | -3.04408500 |
| H | 1.42867400  | 1.51650400  | -2.73048100 |
| H | 1.10535700  | 0.49310100  | -4.13466500 |
| H | -0.05280500 | 0.53859000  | -2.79684400 |
| C | 4.97341400  | 0.33285600  | 0.49360500  |
| C | 5.34224700  | -0.10134300 | 1.77792500  |
| C | 5.76913900  | -0.05776100 | -0.59388600 |
| C | 6.42724100  | -0.95962400 | 1.96084800  |
| H | 4.78457800  | 0.25076000  | 2.64096100  |
| C | 6.85769700  | -0.91372700 | -0.41184700 |
| H | 5.55315400  | 0.32548200  | -1.58418300 |
| C | 7.18223800  | -1.37772500 | 0.86369100  |
| H | 6.69000800  | -1.28863900 | 2.96176500  |
| H | 7.46063200  | -1.20441900 | -1.26703600 |
| H | 8.02972600  | -2.04153100 | 1.00435000  |
| C | -2.55041000 | 1.23776500  | 0.05209900  |
| C | -3.57883100 | 0.49318300  | 0.42276700  |
| C | -5.03707600 | 0.83140100  | 0.61543900  |
| H | -5.65417100 | 0.15757300  | 0.00006600  |
| H | -5.29781800 | 0.62466100  | 1.65863400  |
| O | -5.32584600 | 2.19279800  | 0.38186300  |
| H | -5.33852800 | 2.35048700  | -0.57068900 |
| C | -2.22142400 | 2.61520400  | -0.27927500 |
| C | -2.15849800 | 3.58250300  | 0.74608700  |
| C | -1.97266200 | 3.00634400  | -1.61166500 |
| C | -1.88778700 | 4.91187400  | 0.43538300  |
| H | -2.34851400 | 3.28265400  | 1.77106200  |
| C | -1.69964000 | 4.33802100  | -1.91223800 |
| H | -2.01040400 | 2.26308200  | -2.40233200 |

|                            |             |             |             |
|----------------------------|-------------|-------------|-------------|
| C                          | -1.65665100 | 5.29278200  | -0.89097900 |
| H                          | -1.86426400 | 5.65464300  | 1.22674800  |
| H                          | -1.52567600 | 4.63431600  | -2.94202900 |
| H                          | -1.44811700 | 6.33143000  | -1.12856900 |
| <b>TS</b> <sub>14-15</sub> |             |             |             |
| C                          | -3.04954700 | -0.58840700 | 0.71200300  |
| C                          | -3.10853000 | -1.80594800 | -0.20496000 |
| C                          | -3.04789200 | -3.11782600 | 0.29598100  |
| C                          | -3.33310400 | -1.62815200 | -1.58262900 |
| C                          | -3.19644800 | -4.20872300 | -0.56260300 |
| H                          | -2.87970200 | -3.28799400 | 1.35100100  |
| C                          | -3.47415700 | -2.72174900 | -2.43619900 |
| H                          | -3.41175800 | -0.62444500 | -1.98888400 |
| C                          | -3.40444700 | -4.02054200 | -1.92931100 |
| H                          | -3.15262100 | -5.21328300 | -0.15249900 |
| H                          | -3.64761000 | -2.55582200 | -3.49533600 |
| H                          | -3.52000900 | -4.87402400 | -2.58996800 |
| Au                         | -0.74159500 | -0.15432400 | -0.07994200 |
| C                          | -2.54923400 | -0.76416400 | 2.14348400  |
| O                          | -1.83121000 | -1.66200500 | 2.54046700  |
| O                          | -3.01880100 | 0.21003000  | 2.94422800  |
| C                          | -2.59708200 | 0.14621300  | 4.32510200  |
| H                          | -1.50788700 | 0.18546900  | 4.39102900  |
| H                          | -3.04549500 | 1.01534800  | 4.80352500  |
| H                          | -2.95355600 | -0.77661800 | 4.78679200  |
| P                          | 1.61380100  | -0.42789900 | -0.45952600 |
| C                          | 2.47233200  | 1.21861500  | -0.02109400 |
| C                          | 3.82669000  | 1.47036100  | 0.32449000  |
| C                          | 1.59631200  | 2.31789400  | -0.12636100 |
| C                          | 4.21784800  | 2.80791700  | 0.53126300  |
| C                          | 2.01361800  | 3.63025800  | 0.07448300  |
| H                          | 0.55384200  | 2.14493900  | -0.36878600 |
| C                          | 3.34103600  | 3.87993700  | 0.40622100  |
| H                          | 5.25296400  | 2.99297900  | 0.80010500  |
| H                          | 1.29673100  | 4.43883100  | -0.02260700 |
| H                          | 3.69344300  | 4.89300800  | 0.57383000  |
| C                          | 2.09541700  | -1.99048000 | 0.64917600  |
| C                          | 1.83541600  | -0.69052700 | -2.39666500 |
| C                          | 2.12255900  | -1.49035700 | 2.10207400  |
| H                          | 2.31119800  | -2.34751000 | 2.75840700  |
| H                          | 2.90798700  | -0.75740700 | 2.27906700  |
| H                          | 1.15937100  | -1.06023600 | 2.39337200  |
| C                          | 3.42772500  | -2.63264400 | 0.23693400  |
| H                          | 3.64765300  | -3.43913700 | 0.94585200  |
| H                          | 3.36967300  | -3.08734400 | -0.75616800 |
| H                          | 4.26441300  | -1.93832200 | 0.25846800  |
| C                          | 0.96914700  | -3.03384800 | 0.52106800  |

|           |             |             |             |
|-----------|-------------|-------------|-------------|
| H         | 0.83854400  | -3.40376200 | -0.49642600 |
| H         | 1.24432100  | -3.88995800 | 1.14817200  |
| H         | 0.01235500  | -2.65632900 | 0.88820700  |
| C         | 1.19743200  | -2.02877800 | -2.79960700 |
| H         | 1.76180300  | -2.88713300 | -2.42770200 |
| H         | 0.16066500  | -2.11437100 | -2.45953700 |
| H         | 1.19337700  | -2.09268400 | -3.89371200 |
| C         | 3.31397000  | -0.65317400 | -2.80085300 |
| H         | 3.38512000  | -0.83892300 | -3.87888400 |
| H         | 3.74993500  | 0.32913400  | -2.60793800 |
| H         | 3.91349400  | -1.40972100 | -2.29230500 |
| C         | 1.09557400  | 0.46318600  | -3.09451500 |
| H         | 1.49076200  | 1.44173600  | -2.80912100 |
| H         | 1.22755000  | 0.35445000  | -4.17721600 |
| H         | 0.02273000  | 0.44672500  | -2.88203800 |
| C         | 4.93813700  | 0.48428800  | 0.54788400  |
| C         | 5.27176300  | 0.10620700  | 1.85926800  |
| C         | 5.78114700  | 0.07603500  | -0.49670600 |
| C         | 6.37034800  | -0.71668800 | 2.11071800  |
| H         | 4.67636400  | 0.47540600  | 2.68922400  |
| C         | 6.88272400  | -0.74524700 | -0.24609300 |
| H         | 5.59122400  | 0.41794500  | -1.50741100 |
| C         | 7.17312000  | -1.15471900 | 1.05606100  |
| H         | 6.60590100  | -1.00251500 | 3.13144600  |
| H         | 7.52205400  | -1.05132800 | -1.06882200 |
| H         | 8.03082600  | -1.79142100 | 1.24992200  |
| C         | -3.22229700 | 1.00374000  | 0.08738400  |
| C         | -4.21595200 | 0.36373200  | 0.58649400  |
| C         | -5.66677900 | 0.33583300  | 0.94541000  |
| H         | -6.13006500 | -0.54327600 | 0.47253600  |
| H         | -5.73785300 | 0.18879900  | 2.02897500  |
| O         | -6.32808600 | 1.54021900  | 0.64015800  |
| H         | -6.55404000 | 1.54372700  | -0.29875000 |
| C         | -2.63888500 | 2.24337500  | -0.42485900 |
| C         | -2.35189600 | 3.28075000  | 0.48120100  |
| C         | -2.44982900 | 2.45232100  | -1.80292400 |
| C         | -1.88080300 | 4.50518100  | 0.00975600  |
| H         | -2.51867900 | 3.12296400  | 1.54157200  |
| C         | -1.97719700 | 3.67970100  | -2.26395800 |
| H         | -2.69378400 | 1.66342100  | -2.50745700 |
| C         | -1.69002100 | 4.70659000  | -1.36026400 |
| H         | -1.67813000 | 5.30760300  | 0.71252400  |
| H         | -1.84637000 | 3.83954800  | -3.32968400 |
| H         | -1.33225800 | 5.66474000  | -1.72441300 |
| <b>15</b> |             |             |             |
| C         | -3.50875800 | -0.24505400 | 0.93180600  |
| C         | -3.02960300 | -1.43737800 | 0.13748400  |



|    |             |             |             |
|----|-------------|-------------|-------------|
| C  | -3.10784200 | -2.73150100 | 0.67333200  |
| C  | -2.58778700 | -1.29338600 | -1.20829600 |
| C  | -2.81435800 | -3.85304500 | -0.10430700 |
| H  | -3.42589700 | -2.86129100 | 1.70288700  |
| C  | -2.29488200 | -2.44448400 | -1.99123700 |
| H  | -2.70357100 | -0.32948200 | -1.69988000 |
| C  | -2.40536500 | -3.71942900 | -1.43527200 |
| H  | -2.91446000 | -4.84330100 | 0.33021500  |
| H  | -2.02816700 | -2.32094200 | -3.03640400 |
| H  | -2.19379200 | -4.59727400 | -2.03673800 |
| Au | -0.32441200 | -1.09223100 | -0.70008900 |
| C  | -2.81314900 | -0.07851000 | 2.26436400  |
| O  | -1.74833000 | -0.60101900 | 2.54944800  |
| O  | -3.48822800 | 0.73515600  | 3.08877400  |
| C  | -2.86888000 | 1.00519800  | 4.36214700  |
| H  | -1.91123000 | 1.51108500  | 4.21942700  |
| H  | -3.56631700 | 1.65119700  | 4.89328200  |
| H  | -2.70618900 | 0.07584400  | 4.91225100  |
| P  | 2.03228600  | -0.75736100 | -0.27253800 |
| C  | 2.47051200  | 0.99456000  | -0.89171500 |
| C  | 3.55132200  | 1.84261500  | -0.53383200 |
| C  | 1.58218200  | 1.43782300  | -1.89333100 |
| C  | 3.67584700  | 3.07561800  | -1.20495900 |
| C  | 1.73752900  | 2.65477200  | -2.55125000 |
| H  | 0.74128000  | 0.80933600  | -2.16838700 |
| C  | 2.79813700  | 3.48558400  | -2.20241500 |
| H  | 4.50149400  | 3.72091200  | -0.92228500 |
| H  | 1.03055200  | 2.94375400  | -3.32276200 |
| H  | 2.94232700  | 4.44223100  | -2.69492200 |
| C  | 2.25905000  | -1.09637500 | 1.65616200  |
| C  | 2.98770000  | -2.01286000 | -1.45141700 |
| C  | 1.70456000  | 0.13875300  | 2.38299200  |
| H  | 1.77643100  | -0.03901400 | 3.46221900  |
| H  | 2.26950000  | 1.04202100  | 2.15830500  |
| H  | 0.64828600  | 0.29969900  | 2.15161700  |
| C  | 3.71198800  | -1.38864900 | 2.05799900  |
| H  | 3.73835500  | -1.53715800 | 3.14366300  |
| H  | 4.08526500  | -2.30882000 | 1.60053100  |
| H  | 4.39578500  | -0.57652400 | 1.82000000  |
| C  | 1.37655800  | -2.30681500 | 2.02148800  |
| H  | 1.67644700  | -3.22548700 | 1.51472200  |
| H  | 1.48372200  | -2.47743500 | 3.09889900  |
| H  | 0.31820500  | -2.11412900 | 1.82896700  |
| C  | 2.73333800  | -3.44995800 | -0.97220000 |
| H  | 3.22122600  | -3.66564700 | -0.01898500 |
| H  | 1.66564800  | -3.67161400 | -0.87867600 |
| H  | 3.15029100  | -4.14021900 | -1.71442900 |
| C  | 4.49148700  | -1.71602100 | -1.48928600 |

|                     |             |             |             |
|---------------------|-------------|-------------|-------------|
| H                   | 4.97850300  | -2.46306300 | -2.12684600 |
| H                   | 4.68846300  | -0.73485400 | -1.92708600 |
| H                   | 4.96040200  | -1.76225100 | -0.50508200 |
| C                   | 2.40735300  | -1.83545300 | -2.86521300 |
| H                   | 2.53692100  | -0.81703300 | -3.24061300 |
| H                   | 2.93961300  | -2.50945500 | -3.54617500 |
| H                   | 1.34354600  | -2.08937300 | -2.90471900 |
| C                   | 4.60440600  | 1.62481800  | 0.51534000  |
| C                   | 4.46890700  | 2.24213800  | 1.76995100  |
| C                   | 5.81517600  | 0.98150900  | 0.21759600  |
| C                   | 5.48350000  | 2.15580300  | 2.72421400  |
| H                   | 3.56962800  | 2.80924200  | 1.99181700  |
| C                   | 6.83237100  | 0.89665600  | 1.17090500  |
| H                   | 5.97501800  | 0.56458400  | -0.76981600 |
| C                   | 6.66489700  | 1.47242900  | 2.43113600  |
| H                   | 5.35535000  | 2.63514600  | 3.69009500  |
| H                   | 7.76159700  | 0.39348000  | 0.92070300  |
| H                   | 7.45709900  | 1.40853400  | 3.17070500  |
| C                   | -4.04934200 | 0.99881600  | 0.23869500  |
| C                   | -4.94729200 | 0.21858900  | 0.75942500  |
| C                   | -6.36060100 | -0.07985500 | 1.11281800  |
| H                   | -6.57534000 | -1.14574900 | 0.94086900  |
| H                   | -6.49638700 | 0.09960000  | 2.18630100  |
| O                   | -7.27114900 | 0.77050000  | 0.43999500  |
| H                   | -7.32677400 | 0.48539800  | -0.48141500 |
| C                   | -3.66761100 | 2.22296400  | -0.42909200 |
| C                   | -4.67125500 | 3.11660100  | -0.85008100 |
| C                   | -2.31720900 | 2.54523900  | -0.64612000 |
| C                   | -4.32212300 | 4.30412300  | -1.48536300 |
| C                   | -5.71114000 | 2.86793700  | -0.65931200 |
| C                   | -1.97578500 | 3.73913900  | -1.27988000 |
| H                   | -1.54172600 | 1.86418100  | -0.30557200 |
| C                   | -2.97601600 | 4.61727100  | -1.70350100 |
| H                   | -5.09856500 | 4.99133300  | -1.80715400 |
| H                   | -0.92975700 | 3.98371300  | -1.43835700 |
| H                   | -2.70946400 | 5.54696900  | -2.19698500 |
| TS <sub>2a-16</sub> |             |             |             |
| C                   | 2.14797800  | 0.09067200  | 0.56560600  |
| C                   | 2.62308600  | -1.21546100 | -0.00074700 |
| C                   | 2.41613600  | -1.54698700 | -1.35442500 |
| C                   | 3.21994500  | -2.16860100 | 0.84211000  |
| C                   | 2.82327000  | -2.78458100 | -1.84817200 |
| H                   | 1.95487700  | -0.83338400 | -2.02501600 |
| C                   | 3.63247100  | -3.40157600 | 0.33755500  |
| H                   | 3.36515200  | -1.94201100 | 1.89054000  |
| C                   | 3.43674300  | -3.71626300 | -1.00801600 |
| H                   | 2.66436900  | -3.01788900 | -2.89666300 |

|    |             |             |             |
|----|-------------|-------------|-------------|
| H  | 4.10180400  | -4.11945800 | 1.00343100  |
| H  | 3.75391500  | -4.67872600 | -1.39737300 |
| Au | -0.08509800 | -0.06060500 | 0.61144600  |
| C  | 2.36130500  | 1.42878000  | -0.14330500 |
| O  | 2.20246200  | 2.49029500  | 0.42910200  |
| O  | 2.67414200  | 1.30677800  | -1.43311300 |
| C  | 2.86032500  | 2.54899000  | -2.15248100 |
| H  | 3.68433200  | 3.11229100  | -1.71165300 |
| H  | 3.09517900  | 2.25522600  | -3.17392000 |
| H  | 1.94816200  | 3.14791800  | -2.11672800 |
| P  | -2.52481500 | -0.35468200 | 0.49761100  |
| C  | -3.26034000 | 1.34193200  | 0.03711800  |
| C  | -4.50293100 | 1.66222700  | -0.56977500 |
| C  | -2.41333600 | 2.40217400  | 0.42278900  |
| C  | -4.82019800 | 3.02323900  | -0.74767700 |
| C  | -2.75813500 | 3.73895000  | 0.24584200  |
| H  | -1.45175200 | 2.17962200  | 0.87349300  |
| C  | -3.97676900 | 4.05400600  | -0.34677800 |
| H  | -5.76925400 | 3.26173400  | -1.21730400 |
| H  | -2.07196300 | 4.51773600  | 0.56327500  |
| H  | -4.26936300 | 5.08773700  | -0.50239100 |
| C  | -2.77678500 | -1.80653500 | -0.80868100 |
| C  | -3.13193600 | -0.76758800 | 2.32297200  |
| C  | -2.50724200 | -1.18952600 | -2.19046500 |
| H  | -2.53426600 | -1.98758000 | -2.94114700 |
| H  | -3.25392500 | -0.44719700 | -2.46769500 |
| H  | -1.51660800 | -0.72398700 | -2.23836300 |
| C  | -4.15991100 | -2.46931600 | -0.74223500 |
| H  | -4.21634300 | -3.22414200 | -1.53530000 |
| H  | -4.31297600 | -2.99009100 | 0.20707700  |
| H  | -4.97812300 | -1.76841500 | -0.89262500 |
| C  | -1.69682600 | -2.87385600 | -0.53637600 |
| H  | -1.79772800 | -3.34764000 | 0.44082400  |
| H  | -1.80533000 | -3.65843500 | -1.29382000 |
| H  | -0.68145600 | -2.47472000 | -0.62380800 |
| C  | -2.59761600 | -2.14842400 | 2.73255200  |
| H  | -3.07526200 | -2.96121500 | 2.18052400  |
| H  | -1.51286200 | -2.22765200 | 2.60915300  |
| H  | -2.81958100 | -2.30315600 | 3.79448400  |
| C  | -4.66030900 | -0.72705500 | 2.43033900  |
| H  | -4.94608200 | -0.98764600 | 3.45606400  |
| H  | -5.04166800 | 0.27652600  | 2.22973600  |
| H  | -5.15266200 | -1.43212700 | 1.75777100  |
| C  | -2.53237900 | 0.30773700  | 3.24627500  |
| H  | -2.86183200 | 1.31497700  | 2.97849200  |
| H  | -2.86788900 | 0.11086000  | 4.27089400  |
| H  | -1.43812100 | 0.28640100  | 3.24396900  |
| C  | -5.54908000 | 0.72513300  | -1.10177300 |

|                       |             |             |             |
|-----------------------|-------------|-------------|-------------|
| C                     | -5.61401600 | 0.47623100  | -2.48310500 |
| C                     | -6.58176900 | 0.23475900  | -0.28850900 |
| C                     | -6.63902300 | -0.30080700 | -3.02439900 |
| H                     | -4.86561600 | 0.91133100  | -3.13937900 |
| C                     | -7.61013200 | -0.54038500 | -0.82946800 |
| H                     | -6.59798700 | 0.47839400  | 0.76726300  |
| C                     | -7.63508500 | -0.82128900 | -2.19631200 |
| H                     | -6.66662200 | -0.48562700 | -4.09407600 |
| H                     | -8.40018100 | -0.91035800 | -0.18276600 |
| H                     | -8.43634400 | -1.42162300 | -2.61607100 |
| C                     | 5.76371000  | 0.77806600  | 0.78103700  |
| C                     | 4.81001200  | 0.90182900  | 1.52321200  |
| C                     | 3.68196700  | 1.07274200  | 2.41056800  |
| H                     | 3.88497300  | 0.71950000  | 3.42513000  |
| H                     | 3.34627200  | 2.11130700  | 2.43492200  |
| O                     | 2.52328900  | 0.22659400  | 2.01212500  |
| H                     | 1.23819400  | 0.41938900  | 1.70458900  |
| C                     | 6.88534300  | 0.61069100  | -0.08450800 |
| C                     | 7.58551800  | 1.73256300  | -0.57022800 |
| C                     | 7.30286500  | -0.68220000 | -0.45783900 |
| C                     | 8.68366000  | 1.55913300  | -1.40787800 |
| H                     | 7.26621100  | 2.72780300  | -0.27808200 |
| C                     | 8.39730700  | -0.84343700 | -1.30249000 |
| H                     | 6.76019800  | -1.54425000 | -0.08382400 |
| C                     | 9.09021900  | 0.27387000  | -1.77642800 |
| H                     | 9.22412000  | 2.42665800  | -1.77376000 |
| H                     | 8.71452100  | -1.84161100 | -1.58826600 |
| H                     | 9.94707800  | 0.14322800  | -2.43033400 |
| <b>P<sub>1a</sub></b> |             |             |             |
| C                     | 1.33382300  | 0.22749200  | 0.32665700  |
| C                     | 2.43805900  | -0.75579600 | -0.02371600 |
| C                     | 3.49486700  | -0.96254400 | 0.87139000  |
| C                     | 2.42816600  | -1.43348100 | -1.24658200 |
| C                     | 4.52388400  | -1.84613800 | 0.54670100  |
| H                     | 3.49445200  | -0.43690500 | 1.82028000  |
| C                     | 3.46160100  | -2.31330200 | -1.57221400 |
| H                     | 1.60957500  | -1.27445400 | -1.94329200 |
| C                     | 4.51111900  | -2.52198700 | -0.67574900 |
| H                     | 5.33756700  | -2.00636300 | 1.24845900  |
| H                     | 3.44268900  | -2.83958100 | -2.52234900 |
| H                     | 5.31342000  | -3.21002500 | -0.92684700 |
| C                     | 1.82827100  | 1.65880200  | 0.04522100  |
| O                     | 2.20966400  | 2.44713400  | 0.88135800  |
| O                     | 1.79470100  | 1.91318600  | -1.27786300 |
| C                     | 2.30407400  | 3.19897200  | -1.67268800 |
| H                     | 3.35134800  | 3.30297600  | -1.37856400 |
| H                     | 2.20576900  | 3.23435200  | -2.75738100 |

|                       |             |             |             |
|-----------------------|-------------|-------------|-------------|
| H                     | 1.72476100  | 4.00033300  | -1.20750600 |
| C                     | -2.41457200 | 0.20469200  | 0.94099100  |
| C                     | -1.37446100 | 0.48589200  | 1.49925200  |
| C                     | -0.10694200 | 0.82627000  | 2.15474900  |
| H                     | 0.09715000  | 1.89975700  | 2.04969800  |
| H                     | -0.16695700 | 0.60699600  | 3.22573500  |
| O                     | 1.00730600  | 0.05961700  | 1.69044600  |
| H                     | 0.46094600  | 0.04619000  | -0.31522200 |
| C                     | -3.64781000 | -0.12791400 | 0.29880600  |
| C                     | -4.20829100 | 0.73288200  | -0.66488000 |
| C                     | -4.32123900 | -1.32266800 | 0.61982300  |
| C                     | -5.40993900 | 0.40484500  | -1.28759000 |
| H                     | -3.69181000 | 1.65419200  | -0.91454100 |
| C                     | -5.52211400 | -1.64368400 | -0.00806900 |
| H                     | -3.89110500 | -1.98792400 | 1.36150700  |
| C                     | -6.07006300 | -0.78268300 | -0.96220500 |
| H                     | -5.83270400 | 1.07694200  | -2.02877300 |
| H                     | -6.03211600 | -2.56792300 | 0.24768100  |
| H                     | -7.00695300 | -1.03596500 | -1.44979900 |
| <b>P<sub>2a</sub></b> |             |             |             |
| C                     | 0.54435300  | -0.50157400 | 0.08491800  |
| C                     | 1.47674200  | 0.64643000  | -0.23237400 |
| C                     | 2.21311100  | 0.65436400  | -1.42382900 |
| C                     | 1.58794900  | 1.74649600  | 0.63148300  |
| C                     | 3.03590400  | 1.73611900  | -1.74499000 |
| H                     | 2.13610800  | -0.19284700 | -2.09919900 |
| C                     | 2.40959500  | 2.82662400  | 0.31221800  |
| H                     | 1.03885200  | 1.75026500  | 1.56867800  |
| C                     | 3.13713000  | 2.82614600  | -0.88002500 |
| H                     | 3.60050200  | 1.72389800  | -2.67354000 |
| H                     | 2.48038000  | 3.67014500  | 0.99375800  |
| H                     | 3.77657500  | 3.66803200  | -1.13077900 |
| C                     | 0.75030100  | -1.28611400 | 1.36542400  |
| O                     | 0.09945400  | -2.26922900 | 1.66536400  |
| O                     | 1.75293700  | -0.80953600 | 2.13386900  |
| C                     | 2.00954600  | -1.55273100 | 3.33511800  |
| H                     | 2.27001000  | -2.58774200 | 3.09966200  |
| H                     | 2.84520500  | -1.04800500 | 3.82014300  |
| H                     | 1.13084300  | -1.55367700 | 3.98539900  |
| C                     | -0.89312600 | -0.48258900 | -0.43082000 |
| C                     | -0.09504900 | -1.31427600 | -1.02798100 |
| C                     | 0.13663600  | -2.49588700 | -1.88857800 |
| H                     | 0.25568700  | -3.36432400 | -1.22093500 |
| H                     | -0.75566700 | -2.67240100 | -2.50883600 |
| O                     | 1.29828100  | -2.29844700 | -2.68928400 |
| H                     | 1.54988600  | -3.15221500 | -3.06252900 |
| C                     | -2.18552900 | 0.11790600  | -0.19385500 |

|           |             |             |             |
|-----------|-------------|-------------|-------------|
| C         | -2.35101300 | 1.07672000  | 0.81935100  |
| C         | -3.29542800 | -0.24460000 | -0.98053000 |
| C         | -3.59833000 | 1.65524200  | 1.04502000  |
| H         | -1.49482000 | 1.36508700  | 1.42053500  |
| C         | -4.53830500 | 0.33788700  | -0.75295100 |
| H         | -3.17255900 | -0.98383300 | -1.76641200 |
| C         | -4.69399900 | 1.28852500  | 0.26086500  |
| H         | -3.71522700 | 2.39479500  | 1.83176500  |
| H         | -5.38867000 | 0.05100300  | -1.36482000 |
| H         | -5.66540700 | 1.74138700  | 0.43673100  |
| <b>Ab</b> |             |             |             |
| C         | 0.07695300  | 0.37962800  | 0.00008000  |
| C         | -1.37153700 | 0.08039100  | -0.00005800 |
| C         | -1.83759900 | -1.24707800 | -0.00034400 |
| C         | -2.31626000 | 1.12441600  | 0.00009300  |
| C         | -3.20738200 | -1.50800400 | -0.00047400 |
| H         | -1.12433700 | -2.05992200 | -0.00046200 |
| C         | -3.68113600 | 0.85067400  | -0.00003900 |
| H         | -1.99022700 | 2.16048400  | 0.00031600  |
| C         | -4.13759400 | -0.46855300 | -0.00032400 |
| H         | -3.54575300 | -2.54041600 | -0.00069600 |
| H         | -4.38869300 | 1.67490400  | 0.00008200  |
| H         | -5.20238200 | -0.68138600 | -0.00042800 |
| C         | 1.18342400  | -0.59185600 | -0.00003100 |
| O         | 1.05515900  | -1.80215000 | -0.00023700 |
| O         | 2.38662400  | 0.03234800  | 0.00013100  |
| C         | 3.54423300  | -0.83512000 | 0.00003700  |
| H         | 3.50160100  | -1.48062400 | 0.88278400  |
| H         | 3.50168700  | -1.48032000 | -0.88293600 |
| N         | 0.44572700  | 1.64474600  | 0.00032200  |
| N         | 0.73720100  | 2.74524400  | 0.00055600  |
| C         | 4.77433800  | 0.05217500  | 0.00025000  |
| H         | 4.79616600  | 0.69152400  | 0.88737300  |
| H         | 5.67628000  | -0.56762300 | 0.00018500  |
| H         | 4.79625000  | 0.69183100  | -0.88665000 |
| <b>Db</b> |             |             |             |
| C         | -0.82812000 | -0.61521100 | 0.16080300  |
| C         | -1.88207600 | 0.21021300  | 0.22869500  |
| C         | -3.29917600 | -0.25471400 | 0.36501700  |
| H         | -3.34414600 | -1.35273000 | 0.28342800  |
| H         | -3.67202000 | 0.01107900  | 1.37027700  |
| O         | -4.08517000 | 0.38323800  | -0.63995800 |
| H         | -5.01439100 | 0.21600100  | -0.43826400 |
| C         | 0.59398100  | -0.25055000 | 0.07295600  |
| C         | 1.05477600  | 1.07883100  | 0.12082800  |
| C         | 1.54871100  | -1.27327700 | -0.06599700 |
| C         | 2.41272100  | 1.36789900  | 0.02552200  |

|                        |             |             |             |
|------------------------|-------------|-------------|-------------|
| H                      | 0.34575100  | 1.89275700  | 0.23686800  |
| C                      | 2.90968000  | -0.98528300 | -0.16010300 |
| H                      | 1.21305600  | -2.30689200 | -0.10289500 |
| C                      | 3.34838500  | 0.33822800  | -0.11559600 |
| H                      | 2.74524700  | 2.40154100  | 0.06438600  |
| H                      | 3.62618300  | -1.79477400 | -0.26795400 |
| H                      | 4.40752900  | 0.56776200  | -0.18764600 |
| H                      | -1.02216100 | -1.68850100 | 0.16808500  |
| H                      | -1.75699200 | 1.29104000  | 0.20062900  |
| <b>AuL<sub>2</sub></b> |             |             |             |
| P                      | -0.07410000 | 0.15473500  | -0.14188200 |
| C                      | 1.29812000  | 0.38760100  | -1.46302400 |
| C                      | 1.50644700  | 1.84456000  | -1.92373200 |
| C                      | 2.61992100  | -0.28284500 | -1.04780600 |
| H                      | 0.87565500  | -0.17624500 | -2.30578100 |
| C                      | 2.53493000  | 1.88648500  | -3.07249800 |
| H                      | 1.86804600  | 2.45666100  | -1.09054000 |
| H                      | 0.56298900  | 2.28131400  | -2.26522200 |
| C                      | 3.63989700  | -0.21712700 | -2.19969100 |
| H                      | 3.03490800  | 0.22626600  | -0.16882200 |
| H                      | 2.44505000  | -1.32698800 | -0.76106200 |
| C                      | 3.86084100  | 1.22384200  | -2.67923900 |
| H                      | 2.69523800  | 2.92955300  | -3.36505000 |
| H                      | 2.11376900  | 1.37713900  | -3.94979300 |
| H                      | 4.58341900  | -0.66423100 | -1.86983500 |
| H                      | 3.27777500  | -0.83148100 | -3.03514300 |
| H                      | 4.55216200  | 1.23521200  | -3.52807300 |
| H                      | 4.33921700  | 1.80689400  | -1.88030300 |
| C                      | -1.69457200 | 0.97084700  | -0.75803500 |
| C                      | -2.94442900 | 0.22142300  | -0.25411800 |
| C                      | -1.77947600 | 2.47480900  | -0.41252900 |
| H                      | -1.62962400 | 0.85531400  | -1.84807000 |
| C                      | -4.22814100 | 0.84679600  | -0.82833700 |
| H                      | -2.97811600 | 0.25975200  | 0.84360600  |
| H                      | -2.88911100 | -0.83739000 | -0.53448000 |
| C                      | -3.06560300 | 3.08611100  | -1.00262100 |
| H                      | -1.79489600 | 2.59845200  | 0.67770700  |
| H                      | -0.90786000 | 3.01873100  | -0.78734300 |
| C                      | -4.31907700 | 2.34696200  | -0.51995300 |
| H                      | -5.09658900 | 0.31582800  | -0.42485300 |
| H                      | -4.24488800 | 0.69323600  | -1.91577600 |
| H                      | -3.11098400 | 4.14541700  | -0.72823900 |
| H                      | -3.01206500 | 3.04918200  | -2.09893600 |
| H                      | -5.21169400 | 2.77364900  | -0.98865100 |
| H                      | -4.43527200 | 2.49235800  | 0.56276500  |
| C                      | 0.34495000  | 0.76569300  | 1.62801300  |
| C                      | 1.03779000  | -0.31041800 | 2.48623300  |

|           |             |             |             |
|-----------|-------------|-------------|-------------|
| C         | 1.14573400  | 2.08559400  | 1.64186900  |
| H         | -0.65259300 | 0.95187800  | 2.04817800  |
| C         | 1.22992300  | 0.19323400  | 3.92827800  |
| H         | 2.01352400  | -0.56077200 | 2.05048000  |
| H         | 0.44261600  | -1.23157400 | 2.49026700  |
| C         | 1.32596500  | 2.57963100  | 3.09101900  |
| H         | 2.13341800  | 1.91569800  | 1.19686300  |
| H         | 0.64964600  | 2.85582200  | 1.04535300  |
| C         | 1.99887100  | 1.52056300  | 3.97255100  |
| H         | 1.75144000  | -0.57448100 | 4.50931500  |
| H         | 0.24445600  | 0.32350500  | 4.39579100  |
| H         | 1.91384900  | 3.50364200  | 3.07886300  |
| H         | 0.34385700  | 2.84001100  | 3.50813900  |
| H         | 2.06954700  | 1.87941300  | 5.00440200  |
| H         | 3.02912200  | 1.35856200  | 3.62730300  |
| Au        | -0.44224100 | -2.20258100 | -0.03649500 |
| <b>17</b> |             |             |             |
| C         | 3.27403300  | -0.74681600 | -0.76099000 |
| C         | 2.85007800  | -1.97035600 | -0.26535300 |
| C         | 2.62283200  | -3.15771400 | -1.17768500 |
| H         | 2.30062200  | -2.81396700 | -2.17353200 |
| H         | 1.83029000  | -3.80046100 | -0.76937700 |
| O         | 3.86829800  | -3.83450300 | -1.23085800 |
| H         | 3.72503400  | -4.72995600 | -1.56450800 |
| C         | 3.93160000  | 0.35007500  | -0.04305100 |
| C         | 4.25387500  | 0.28780900  | 1.32778000  |
| C         | 4.28838100  | 1.49948900  | -0.77353100 |
| C         | 4.90750300  | 1.34879900  | 1.94325100  |
| H         | 4.00787200  | -0.59535100 | 1.90888400  |
| C         | 4.94503600  | 2.56041400  | -0.15406900 |
| H         | 4.05801800  | 1.55081100  | -1.83457400 |
| C         | 5.25343900  | 2.48765100  | 1.20546000  |
| H         | 5.15975000  | 1.28779000  | 2.99717600  |
| H         | 5.22172800  | 3.43693400  | -0.73114000 |
| H         | 5.77005300  | 3.31022700  | 1.69020500  |
| H         | 3.22664000  | -0.61993300 | -1.84332400 |
| H         | 3.05707600  | -2.22809100 | 0.77204100  |
| P         | -1.31074600 | 0.10180000  | 0.19212700  |
| C         | -1.15646000 | 1.93531300  | 0.74058500  |
| C         | -2.42277500 | 2.57547300  | 1.33914400  |
| C         | -0.54703300 | 2.80842000  | -0.37274100 |
| H         | -0.41316200 | 1.85219900  | 1.54602200  |
| C         | -2.10995900 | 3.99503200  | 1.85198900  |
| H         | -3.21353600 | 2.63026900  | 0.58258200  |
| H         | -2.80754700 | 1.96857800  | 2.16497600  |
| C         | -0.25158000 | 4.22640700  | 0.14770700  |
| H         | -1.24784500 | 2.87424800  | -1.21478300 |

|           |             |             |             |
|-----------|-------------|-------------|-------------|
| H         | 0.37250000  | 2.35034900  | -0.75705800 |
| C         | -1.50130200 | 4.87826200  | 0.75457600  |
| H         | -3.02709500 | 4.44613500  | 2.24588500  |
| H         | -1.40938400 | 3.92506700  | 2.69558600  |
| H         | 0.14331400  | 4.83888900  | -0.67028400 |
| H         | 0.53950500  | 4.17209900  | 0.90837000  |
| H         | -1.25311200 | 5.86507400  | 1.15958700  |
| H         | -2.24679400 | 5.04472700  | -0.03535700 |
| C         | -2.12943100 | -0.86778100 | 1.63160600  |
| C         | -1.62204300 | -2.32374600 | 1.68147900  |
| C         | -3.67067700 | -0.83146800 | 1.63515100  |
| H         | -1.76151400 | -0.34307700 | 2.52421700  |
| C         | -2.19527400 | -3.07302700 | 2.89715900  |
| H         | -1.91783300 | -2.84426700 | 0.75921100  |
| H         | -0.52593900 | -2.34227100 | 1.71641800  |
| C         | -4.23215000 | -1.57396000 | 2.86247000  |
| H         | -4.04745500 | -1.31743600 | 0.72601200  |
| H         | -4.04002000 | 0.19770700  | 1.62423000  |
| C         | -3.72817900 | -3.02132000 | 2.92853400  |
| H         | -1.84476700 | -4.11085700 | 2.88275900  |
| H         | -1.79580000 | -2.62064500 | 3.81522400  |
| H         | -5.32668800 | -1.54841800 | 2.82844500  |
| H         | -3.93592700 | -1.03861800 | 3.77494300  |
| H         | -4.10383800 | -3.51202300 | 3.83257300  |
| H         | -4.13066100 | -3.58675200 | 2.07659900  |
| C         | -2.35547700 | -0.15203100 | -1.39728400 |
| C         | -1.48901200 | -0.07839900 | -2.67131700 |
| C         | -3.59460800 | 0.75739700  | -1.52812600 |
| H         | -2.69840000 | -1.19005400 | -1.28462600 |
| C         | -2.31232700 | -0.44614200 | -3.91791600 |
| H         | -1.08764500 | 0.93715200  | -2.78508500 |
| H         | -0.62755900 | -0.75092000 | -2.58131500 |
| C         | -4.41516300 | 0.37548300  | -2.77445000 |
| H         | -3.27113200 | 1.80129400  | -1.62180900 |
| H         | -4.22567600 | 0.69702500  | -0.63779500 |
| C         | -3.56684800 | 0.42831800  | -4.05129800 |
| H         | -1.68248600 | -0.35404000 | -4.80957500 |
| H         | -2.60864200 | -1.50228400 | -3.85238300 |
| H         | -5.27714300 | 1.04636300  | -2.85715500 |
| H         | -4.82026200 | -0.63730900 | -2.64301800 |
| H         | -4.16058700 | 0.10789800  | -4.91391100 |
| H         | -3.26791500 | 1.46746500  | -4.24702200 |
| Au        | 0.93569500  | -0.73167100 | -0.16194700 |
| <b>18</b> |             |             |             |
| C         | 2.89417800  | 0.08865800  | -0.43588500 |
| C         | 3.41124000  | -1.33339700 | -0.25719100 |
| C         | 4.42449100  | -1.62913800 | 0.66462200  |

|   |             |             |             |
|---|-------------|-------------|-------------|
| C | 2.89267700  | -2.35607900 | -1.06821400 |
| C | 4.89645300  | -2.93753400 | 0.77711300  |
| H | 4.82689700  | -0.85593200 | 1.30619800  |
| C | 3.38396300  | -3.65572500 | -0.96270000 |
| H | 2.10313800  | -2.13674700 | -1.78242800 |
| C | 4.38555500  | -3.95042500 | -0.03545200 |
| H | 5.67475800  | -3.15981400 | 1.50032900  |
| H | 2.97929000  | -4.43648300 | -1.59897400 |
| H | 4.76408800  | -4.96374100 | 0.05381800  |
| C | 3.28179300  | 1.17208100  | 0.56936600  |
| O | 3.34950000  | 0.95584800  | 1.75678800  |
| O | 3.48235300  | 2.34826600  | -0.03576300 |
| C | 3.81011000  | 3.49411300  | 0.82044600  |
| H | 3.44463300  | 4.35039800  | 0.25171800  |
| H | 3.24277400  | 3.39667100  | 1.74792500  |
| N | 3.15956200  | 0.52474700  | -1.73481700 |
| N | 3.33538400  | 0.83469500  | -2.79593500 |
| C | 5.30395000  | 3.57402400  | 1.07550900  |
| H | 5.86162200  | 3.62457800  | 0.13637200  |
| H | 5.52273700  | 4.47932400  | 1.65027400  |
| H | 5.65025300  | 2.71442700  | 1.65454000  |
| P | -1.69511100 | 0.15347900  | 0.12288200  |
| C | -1.97808200 | -0.67987200 | 1.82922500  |
| C | -3.37805700 | -0.50482200 | 2.44547300  |
| C | -1.53388300 | -2.15547400 | 1.82846000  |
| H | -1.26691700 | -0.11826900 | 2.45153000  |
| C | -3.41503200 | -1.09806000 | 3.86720400  |
| H | -4.12951800 | -1.00705600 | 1.82648900  |
| H | -3.65015400 | 0.55439000  | 2.48861900  |
| C | -1.58756000 | -2.73828800 | 3.25257100  |
| H | -2.19462200 | -2.74138000 | 1.17657500  |
| H | -0.51933900 | -2.24810400 | 1.42267300  |
| C | -2.97629900 | -2.56833600 | 3.88317400  |
| H | -4.42617200 | -0.99266900 | 4.27515700  |
| H | -2.75260800 | -0.51187500 | 4.51883400  |
| H | -1.30460300 | -3.79615100 | 3.22224800  |
| H | -0.83758000 | -2.23175600 | 3.87546700  |
| H | -2.97352600 | -2.95021400 | 4.90958400  |
| H | -3.70625300 | -3.17325000 | 3.32744400  |
| C | -2.29206500 | 1.97203600  | 0.26695200  |
| C | -1.47044700 | 2.90067900  | -0.64971200 |
| C | -3.80212900 | 2.17781500  | 0.02715700  |
| H | -2.06124200 | 2.22343100  | 1.31148400  |
| C | -1.86838200 | 4.37334200  | -0.45290000 |
| H | -1.63553200 | 2.61591200  | -1.69884600 |
| H | -0.39986800 | 2.77188200  | -0.45327800 |
| C | -4.19207400 | 3.65282200  | 0.23823000  |
| H | -4.04886500 | 1.88911300  | -1.00282800 |

|                           |             |             |             |
|---------------------------|-------------|-------------|-------------|
| H                         | -4.39891700 | 1.54259300  | 0.68729200  |
| C                         | -3.37352700 | 4.59090500  | -0.65748800 |
| H                         | -1.29190500 | 5.00091700  | -1.14158100 |
| H                         | -1.58942300 | 4.68556500  | 0.56315500  |
| H                         | -5.26348700 | 3.77289000  | 0.04431700  |
| H                         | -4.03425800 | 3.91958600  | 1.29230200  |
| H                         | -3.63600400 | 5.63429200  | -0.45291200 |
| H                         | -3.62984700 | 4.40535300  | -1.70987200 |
| C                         | -2.62719800 | -0.68220800 | -1.33207300 |
| C                         | -1.77005900 | -1.76794100 | -2.01365200 |
| C                         | -4.02668400 | -1.22621900 | -0.98314300 |
| H                         | -2.74462100 | 0.14920200  | -2.04124400 |
| C                         | -2.47719300 | -2.32724300 | -3.26077900 |
| H                         | -1.57798700 | -2.58304700 | -1.30372800 |
| H                         | -0.79338900 | -1.35403200 | -2.29112800 |
| C                         | -4.72534700 | -1.77397900 | -2.24165900 |
| H                         | -3.92914300 | -2.03655600 | -0.25066400 |
| H                         | -4.64694900 | -0.45245800 | -0.52322500 |
| C                         | -3.88172600 | -2.85205000 | -2.93360400 |
| H                         | -1.86311800 | -3.12061300 | -3.70120000 |
| H                         | -2.55068600 | -1.53351300 | -4.01717000 |
| H                         | -5.70698200 | -2.17276400 | -1.96355700 |
| H                         | -4.91151800 | -0.94741500 | -2.94110600 |
| H                         | -4.37909500 | -3.19470700 | -3.84708200 |
| H                         | -3.79914100 | -3.72767700 | -2.27503200 |
| Au                        | 0.68402900  | 0.12539800  | -0.25520200 |
| <b>TS<sub>18-19</sub></b> |             |             |             |
| C                         | 2.79129300  | 0.00262200  | -0.22948500 |
| C                         | 3.50833700  | -1.29640100 | -0.14433400 |
| C                         | 4.83756700  | -1.36475200 | 0.31896000  |
| C                         | 2.86431100  | -2.48155800 | -0.54850400 |
| C                         | 5.49336900  | -2.58923100 | 0.39063600  |
| H                         | 5.34813100  | -0.46541600 | 0.64585800  |
| C                         | 3.52840700  | -3.70310700 | -0.48745900 |
| H                         | 1.83976700  | -2.43464000 | -0.90581400 |
| C                         | 4.84268400  | -3.75809600 | -0.01589700 |
| H                         | 6.51255100  | -2.63357200 | 0.76059400  |
| H                         | 3.02223200  | -4.61083000 | -0.79977600 |
| H                         | 5.35934100  | -4.71141400 | 0.03796200  |
| C                         | 3.30006000  | 1.14556800  | 0.62305400  |
| O                         | 3.43204800  | 0.98904500  | 1.81717900  |
| O                         | 3.48274600  | 2.28736800  | -0.05022400 |
| C                         | 3.86411300  | 3.46648500  | 0.73400800  |
| H                         | 3.48342200  | 4.30097400  | 1.14314700  |
| H                         | 3.33928300  | 3.42072500  | 1.69020600  |
| N                         | 3.11577600  | 0.54111700  | -1.82741600 |
| N                         | 3.16969800  | 0.67408300  | -2.92693900 |

|   |             |             |             |
|---|-------------|-------------|-------------|
| C | 5.36883100  | 3.53948800  | 0.91872500  |
| H | 5.88516700  | 3.53142700  | -0.04523400 |
| H | 5.62392900  | 4.47152300  | 1.43259100  |
| H | 5.73025600  | 2.70853900  | 1.52953900  |
| P | -1.74141600 | 0.14289600  | 0.12131900  |
| C | -2.12610700 | -0.76022700 | 1.77152200  |
| C | -3.53678400 | -0.55659400 | 2.35283900  |
| C | -1.74955700 | -2.25287700 | 1.70076000  |
| H | -1.41292700 | -0.26855500 | 2.44839400  |
| C | -3.65140900 | -1.23003000 | 3.73439300  |
| H | -4.28811400 | -0.98482900 | 1.68025400  |
| H | -3.76181900 | 0.50987400  | 2.45134500  |
| C | -1.87753700 | -2.91447000 | 3.08481300  |
| H | -2.41408300 | -2.76805900 | 0.99505800  |
| H | -0.72717200 | -2.36968500 | 1.32120900  |
| C | -3.27931300 | -2.71746500 | 3.67779000  |
| H | -4.67089200 | -1.10200300 | 4.11422600  |
| H | -2.98775400 | -0.71428500 | 4.44193100  |
| H | -1.64033000 | -3.98087200 | 3.00192200  |
| H | -1.12926000 | -2.47894800 | 3.76116200  |
| H | -3.33063400 | -3.15800700 | 4.67918900  |
| H | -4.01461400 | -3.25496500 | 3.06279800  |
| C | -2.29300400 | 1.96926700  | 0.32787600  |
| C | -1.41962700 | 2.91135300  | -0.52535700 |
| C | -3.78791100 | 2.23670600  | 0.06244000  |
| H | -2.07984700 | 2.16989000  | 1.38718600  |
| C | -1.77503800 | 4.38605600  | -0.26839100 |
| H | -1.56648300 | 2.68017000  | -1.59034900 |
| H | -0.35881100 | 2.74008800  | -0.30974000 |
| C | -4.13592700 | 3.71134000  | 0.33929600  |
| H | -4.01602000 | 2.01079600  | -0.98713600 |
| H | -4.42164600 | 1.58813300  | 0.67290600  |
| C | -3.26755200 | 4.66342000  | -0.49243300 |
| H | -1.16401700 | 5.02619400  | -0.91457600 |
| H | -1.50823700 | 4.64054300  | 0.76682500  |
| H | -5.19823000 | 3.87712200  | 0.12949600  |
| H | -3.99257900 | 3.92059100  | 1.40832000  |
| H | -3.50019100 | 5.70434100  | -0.24375300 |
| H | -3.50645000 | 4.53622900  | -1.55748400 |
| C | -2.64901300 | -0.59730700 | -1.40014800 |
| C | -1.80824800 | -1.69305500 | -2.08644200 |
| C | -4.08598400 | -1.09368700 | -1.14332100 |
| H | -2.69835900 | 0.26311900  | -2.08238600 |
| C | -2.47318600 | -2.16258100 | -3.39237300 |
| H | -1.69533500 | -2.54774000 | -1.40634800 |
| H | -0.79929000 | -1.31762900 | -2.29445900 |
| C | -4.74404100 | -1.55075800 | -2.45888100 |
| H | -4.05973600 | -1.94018600 | -0.44654900 |

|           |             |             |             |
|-----------|-------------|-------------|-------------|
| H         | -4.69481400 | -0.31507100 | -0.67666700 |
| C         | -3.91546400 | -2.63375400 | -3.16147000 |
| H         | -1.87370700 | -2.96368400 | -3.83907800 |
| H         | -2.47125600 | -1.33277400 | -4.11283400 |
| H         | -5.75551300 | -1.91546600 | -2.24930200 |
| H         | -4.85647200 | -0.68439600 | -3.12524500 |
| H         | -4.38000300 | -2.90774200 | -4.11467100 |
| H         | -3.90825100 | -3.54365900 | -2.54524100 |
| Au        | 0.66587000  | 0.05550500  | -0.16564700 |
| <b>19</b> |             |             |             |
| C         | 2.72432700  | -0.16508800 | 0.34369100  |
| C         | 3.54711000  | -1.27853100 | 0.04597200  |
| C         | 4.95947800  | -1.24957800 | 0.26341100  |
| C         | 2.97020700  | -2.46443300 | -0.50017300 |
| C         | 5.74121300  | -2.34705700 | -0.04764100 |
| H         | 5.41872200  | -0.36222400 | 0.68532100  |
| C         | 3.76054700  | -3.55530700 | -0.81642000 |
| H         | 1.89803500  | -2.48601800 | -0.66557200 |
| C         | 5.14309700  | -3.49652300 | -0.58778400 |
| H         | 6.81206000  | -2.32306200 | 0.12376500  |
| H         | 3.31704900  | -4.45246000 | -1.23485200 |
| H         | 5.76207900  | -4.35523900 | -0.83141400 |
| C         | 3.35255200  | 1.03205100  | 0.96766100  |
| O         | 3.39527300  | 1.10644300  | 2.18113400  |
| O         | 3.76652200  | 1.94230000  | 0.09148500  |
| C         | 4.28714900  | 3.20597800  | 0.63002200  |
| H         | 4.07333500  | 3.92758600  | -0.15940300 |
| H         | 3.71387400  | 3.45632600  | 1.52487200  |
| N         | 2.10438400  | 0.63068400  | -3.46613800 |
| N         | 1.44234200  | 1.51247100  | -3.53886400 |
| C         | 5.77337200  | 3.10377500  | 0.92121500  |
| H         | 6.32760300  | 2.79562600  | 0.03018200  |
| H         | 6.14911200  | 4.08357500  | 1.23212900  |
| H         | 5.96723100  | 2.39721700  | 1.73255400  |
| P         | -1.74286600 | 0.14556000  | 0.17402900  |
| C         | -2.33501900 | -0.77844800 | 1.74895000  |
| C         | -3.79285700 | -0.55146100 | 2.19056800  |
| C         | -1.98831200 | -2.27837600 | 1.67828600  |
| H         | -1.68518700 | -0.32391800 | 2.51035500  |
| C         | -4.05940600 | -1.25388200 | 3.53609700  |
| H         | -4.48338100 | -0.94321400 | 1.43546400  |
| H         | -4.00147000 | 0.51819900  | 2.29365700  |
| C         | -2.26900500 | -2.96947700 | 3.02387000  |
| H         | -2.58765300 | -2.76031400 | 0.89517900  |
| H         | -0.93541300 | -2.41086300 | 1.40020200  |
| C         | -3.71792000 | -2.74909900 | 3.47999400  |
| H         | -5.10828400 | -1.10914500 | 3.81720700  |

|           |             |             |             |
|-----------|-------------|-------------|-------------|
| H         | -3.45774400 | -0.77146900 | 4.31873400  |
| H         | -2.05121700 | -4.03983000 | 2.93738900  |
| H         | -1.58167900 | -2.57012100 | 3.78235100  |
| H         | -3.87976300 | -3.21005300 | 4.46027900  |
| H         | -4.40032100 | -3.25374900 | 2.78185200  |
| C         | -2.26511500 | 1.98359600  | 0.35180600  |
| C         | -1.27374900 | 2.90539900  | -0.38792200 |
| C         | -3.71366900 | 2.29272200  | -0.07567700 |
| H         | -2.16797700 | 2.16713100  | 1.43090400  |
| C         | -1.61778200 | 4.38872900  | -0.16905800 |
| H         | -1.30077900 | 2.68184100  | -1.46407600 |
| H         | -0.24937300 | 2.70605500  | -0.05222000 |
| C         | -4.04985200 | 3.77760400  | 0.15759200  |
| H         | -3.83357400 | 2.06696400  | -1.14337700 |
| H         | -4.42732500 | 1.66432700  | 0.46494200  |
| C         | -3.06565200 | 4.70350100  | -0.56824800 |
| H         | -0.91782200 | 5.01188700  | -0.73680600 |
| H         | -1.46971300 | 4.63739100  | 0.89102000  |
| H         | -5.07603400 | 3.97152500  | -0.17329200 |
| H         | -4.02483000 | 3.98771000  | 1.23571100  |
| H         | -3.29919000 | 5.75101100  | -0.34964400 |
| H         | -3.18044200 | 4.57807300  | -1.65391900 |
| C         | -2.50539000 | -0.53415400 | -1.45178200 |
| C         | -1.61366700 | -1.62061400 | -2.08668500 |
| C         | -3.96601800 | -1.01554200 | -1.35224200 |
| H         | -2.47610000 | 0.34753700  | -2.10740400 |
| C         | -2.15483300 | -2.04586600 | -3.46303700 |
| H         | -1.57488700 | -2.49477500 | -1.42272600 |
| H         | -0.58590800 | -1.25219900 | -2.18686300 |
| C         | -4.49862600 | -1.42985000 | -2.73659800 |
| H         | -4.02082500 | -1.87954000 | -0.67838100 |
| H         | -4.60711100 | -0.23924400 | -0.92690400 |
| C         | -3.61708400 | -2.50497700 | -3.38504600 |
| H         | -1.52310600 | -2.84179900 | -3.87337800 |
| H         | -2.07569700 | -1.19668900 | -4.15601900 |
| H         | -5.52910900 | -1.78762100 | -2.63514300 |
| H         | -4.53900500 | -0.54573600 | -3.38781600 |
| H         | -3.99035500 | -2.74935800 | -4.38526800 |
| H         | -3.67749300 | -3.42974900 | -2.79437400 |
| Au        | 0.69329900  | -0.04009600 | 0.19004400  |
| <b>20</b> |             |             |             |
| C         | 2.80518200  | -0.07003300 | 0.08791700  |
| C         | 3.63296500  | -1.20005900 | -0.12221400 |
| C         | 5.05423700  | -1.12513900 | 0.00909100  |
| C         | 3.05186700  | -2.45133500 | -0.48845400 |
| C         | 5.84067900  | -2.24075000 | -0.21325900 |
| H         | 5.51785800  | -0.18579100 | 0.28998700  |

|   |             |             |             |
|---|-------------|-------------|-------------|
| C | 3.84628500  | -3.56140000 | -0.71525200 |
| H | 1.97268300  | -2.50843800 | -0.58630500 |
| C | 5.23793000  | -3.45564900 | -0.57551200 |
| H | 6.91873100  | -2.18055700 | -0.10904700 |
| H | 3.39930900  | -4.50918900 | -0.99556600 |
| H | 5.86039900  | -4.32865400 | -0.74948200 |
| C | 3.44005900  | 1.19574500  | 0.54801900  |
| O | 3.50012300  | 1.41720700  | 1.74278500  |
| O | 3.84183500  | 1.99083200  | -0.43842200 |
| C | 4.36181800  | 3.31352400  | -0.06637800 |
| H | 4.12731500  | 3.93352600  | -0.93253100 |
| H | 3.80349500  | 3.66605100  | 0.80311100  |
| C | 5.85393200  | 3.25596700  | 0.20630100  |
| H | 6.39539900  | 2.85250100  | -0.65399600 |
| H | 6.22576300  | 4.26764900  | 0.39632900  |
| H | 6.06881600  | 2.64817700  | 1.08921600  |
| P | -1.67063100 | 0.16959300  | 0.08151600  |
| C | -2.20026900 | -0.72418200 | 1.69538500  |
| C | -3.64772800 | -0.51139800 | 2.17606500  |
| C | -1.83093200 | -2.21962200 | 1.65311200  |
| H | -1.53563800 | -0.23947700 | 2.42478300  |
| C | -3.85713800 | -1.17749000 | 3.54994700  |
| H | -4.35394300 | -0.94062200 | 1.45650300  |
| H | -3.87490900 | 0.55667500  | 2.25284600  |
| C | -2.05387300 | -2.87665000 | 3.02625400  |
| H | -2.44885500 | -2.73212700 | 0.90457700  |
| H | -0.78603600 | -2.34326000 | 1.34256700  |
| C | -3.49021400 | -2.66768700 | 3.52586000  |
| H | -4.89880700 | -1.04298000 | 3.86125100  |
| H | -3.23927400 | -0.66156700 | 4.29775800  |
| H | -1.82030500 | -3.94529800 | 2.96266300  |
| H | -1.34855300 | -2.44402700 | 3.74915300  |
| H | -3.61003600 | -3.10207200 | 4.52413100  |
| H | -4.18662100 | -3.20450200 | 2.86663200  |
| C | -2.21188100 | 2.00418700  | 0.23767200  |
| C | -1.24871900 | 2.92422800  | -0.54030600 |
| C | -3.67362500 | 2.28698500  | -0.16315500 |
| H | -2.09315700 | 2.20884500  | 1.31077900  |
| C | -1.60761000 | 4.40692200  | -0.34318200 |
| H | -1.29522900 | 2.67911400  | -1.61126100 |
| H | -0.21541400 | 2.74447400  | -0.22163900 |
| C | -4.02400500 | 3.77218000  | 0.04603000  |
| H | -3.81466700 | 2.03613700  | -1.22268200 |
| H | -4.36682000 | 1.66164400  | 0.40699600  |
| C | -3.06718600 | 4.69515900  | -0.71899200 |
| H | -0.92744700 | 5.02802000  | -0.93669900 |
| H | -1.44158800 | 4.67798200  | 0.70865200  |
| H | -5.05924300 | 3.94601300  | -0.26736400 |

|                     |             |             |             |
|---------------------|-------------|-------------|-------------|
| H                   | -3.97970400 | 4.00535000  | 1.11874400  |
| H                   | -3.30999200 | 5.74391700  | -0.51715800 |
| H                   | -3.20245600 | 4.54569100  | -1.79928200 |
| C                   | -2.47498400 | -0.55619400 | -1.50324100 |
| C                   | -1.58835700 | -1.64335100 | -2.14380600 |
| C                   | -3.92442900 | -1.05570900 | -1.34652100 |
| H                   | -2.48033800 | 0.31116900  | -2.17797400 |
| C                   | -2.16608100 | -2.10211700 | -3.49428000 |
| H                   | -1.51868800 | -2.50384000 | -1.46464300 |
| H                   | -0.56893300 | -1.26415700 | -2.28275100 |
| C                   | -4.49455200 | -1.50260900 | -2.70566700 |
| H                   | -3.94462100 | -1.90720700 | -0.65514700 |
| H                   | -4.56252100 | -0.28018300 | -0.91512200 |
| C                   | -3.61927600 | -2.57767900 | -3.36280000 |
| H                   | -1.53699300 | -2.89800300 | -3.90862600 |
| H                   | -2.11856000 | -1.26575400 | -4.20541400 |
| H                   | -5.51661300 | -1.87138600 | -2.56586900 |
| H                   | -4.56616900 | -0.63061900 | -3.37038000 |
| H                   | -4.02001200 | -2.84343800 | -4.34683700 |
| H                   | -3.65036200 | -3.49326700 | -2.75567700 |
| Au                  | 0.76787300  | 0.01506600  | 0.01614300  |
| TS <sub>20-21</sub> |             |             |             |
| C                   | 0.38644500  | 3.07574000  | -1.96558000 |
| C                   | -0.95530200 | 3.06791200  | -1.91484500 |
| C                   | -1.78439300 | 2.10245200  | -2.69062200 |
| H                   | -1.17586200 | 1.27568600  | -3.07691300 |
| H                   | -2.27020000 | 2.60395400  | -3.54091300 |
| O                   | -2.86645800 | 1.58902600  | -1.86320800 |
| H                   | -3.40751000 | 0.99637800  | -2.40670300 |
| C                   | 1.29329100  | 4.01890800  | -1.29633400 |
| C                   | 2.65028900  | 4.03592200  | -1.66499500 |
| C                   | 0.86436700  | 4.90596700  | -0.29010200 |
| C                   | 3.54934600  | 4.91585900  | -1.06298400 |
| H                   | 2.99738000  | 3.36162000  | -2.44452000 |
| C                   | 1.76261000  | 5.78222800  | 0.31278100  |
| H                   | -0.17332300 | 4.90093700  | 0.02923200  |
| C                   | 3.10797300  | 5.79337100  | -0.07151700 |
| H                   | 4.59050700  | 4.92050500  | -1.37175300 |
| H                   | 1.41381200  | 6.46169600  | 1.08499000  |
| H                   | 3.80366800  | 6.48182400  | 0.39849100  |
| H                   | 0.88132500  | 2.32689300  | -2.58636500 |
| H                   | -1.51034500 | 3.80117700  | -1.33927900 |
| C                   | -2.78625100 | 0.42885500  | -0.01995200 |
| C                   | -3.97068000 | -0.33400300 | -0.36070000 |
| C                   | -5.27111400 | 0.21274700  | -0.20756900 |
| C                   | -3.84894200 | -1.65375000 | -0.86137500 |
| C                   | -6.39478100 | -0.53635400 | -0.52820000 |



|   |             |             |             |
|---|-------------|-------------|-------------|
| H | -5.38684700 | 1.22695800  | 0.16024800  |
| C | -4.97653700 | -2.40322900 | -1.17186600 |
| H | -2.85513300 | -2.07370300 | -0.98131500 |
| C | -6.24901100 | -1.84498200 | -1.00543600 |
| H | -7.38505100 | -0.10977200 | -0.40611100 |
| H | -4.87175800 | -3.41841800 | -1.54070600 |
| H | -7.13061200 | -2.43056900 | -1.24863200 |
| C | -2.96372500 | 1.62209100  | 0.89392400  |
| O | -2.72357700 | 2.78228900  | 0.65222200  |
| O | -3.37270100 | 1.14342000  | 2.08632100  |
| C | -3.44855400 | 2.09289600  | 3.19475800  |
| H | -4.22285000 | 1.67650300  | 3.84137300  |
| H | -3.77800800 | 3.05574300  | 2.80005900  |
| C | -2.11483500 | 2.20617200  | 3.91202000  |
| H | -1.78210300 | 1.23011700  | 4.27680700  |
| H | -2.22007700 | 2.87432900  | 4.77270400  |
| H | -1.34990900 | 2.62309900  | 3.25142500  |
| P | 1.35476500  | -1.29577100 | 0.29832800  |
| C | 1.09335800  | -2.99807000 | 1.14737600  |
| C | 2.33872000  | -3.67470300 | 1.74933700  |
| C | 0.30494200  | -3.96596700 | 0.24471200  |
| H | 0.43573200  | -2.71219300 | 1.98089800  |
| C | 1.94350800  | -4.95605700 | 2.50836100  |
| H | 3.05067000  | -3.93234500 | 0.95693700  |
| H | 2.85274000  | -2.99283300 | 2.43374600  |
| C | -0.07528500 | -5.24598000 | 1.00975500  |
| H | 0.91433300  | -4.23745000 | -0.62708300 |
| H | -0.59716400 | -3.47410600 | -0.13869400 |
| C | 1.15808700  | -5.92767900 | 1.61800300  |
| H | 2.84639400  | -5.43740300 | 2.89991000  |
| H | 1.33228200  | -4.68432600 | 3.38013300  |
| H | -0.60072400 | -5.93248500 | 0.33629200  |
| H | -0.78292600 | -4.98907100 | 1.81037800  |
| H | 0.85728800  | -6.80973100 | 2.19352700  |
| H | 1.80910600  | -6.28977300 | 0.80998600  |
| C | 2.41508000  | -0.23617300 | 1.49909000  |
| C | 2.07520500  | 1.26007700  | 1.35510100  |
| C | 3.93709600  | -0.45738300 | 1.39488100  |
| H | 2.07710700  | -0.57433800 | 2.48889900  |
| C | 2.83850300  | 2.11270300  | 2.38318100  |
| H | 2.33453700  | 1.60112300  | 0.34410100  |
| H | 0.99664000  | 1.41564900  | 1.46753200  |
| C | 4.69004900  | 0.39143100  | 2.43626200  |
| H | 4.27739100  | -0.16853300 | 0.39197600  |
| H | 4.19454100  | -1.51208200 | 1.52705000  |
| C | 4.35328700  | 1.88135200  | 2.30329300  |
| H | 2.60186800  | 3.16912100  | 2.21822700  |
| H | 2.48417600  | 1.86129100  | 3.39301800  |

|           |             |             |             |
|-----------|-------------|-------------|-------------|
| H         | 5.76762100  | 0.22735500  | 2.32430300  |
| H         | 4.42511800  | 0.04321200  | 3.44428500  |
| H         | 4.86662500  | 2.45680600  | 3.08139500  |
| H         | 4.72576500  | 2.25608300  | 1.33990300  |
| C         | 2.28430200  | -1.42481200 | -1.37703200 |
| C         | 1.30601300  | -1.60514800 | -2.55618600 |
| C         | 3.41026400  | -2.47569100 | -1.44392200 |
| H         | 2.73759900  | -0.42743100 | -1.46774100 |
| C         | 2.04559000  | -1.53982100 | -3.90439900 |
| H         | 0.79852600  | -2.57478500 | -2.46624100 |
| H         | 0.52384200  | -0.83771800 | -2.51705500 |
| C         | 4.15096200  | -2.39569900 | -2.79182500 |
| H         | 2.97850500  | -3.47830300 | -1.33593900 |
| H         | 4.12153400  | -2.34580200 | -0.62476200 |
| C         | 3.19110500  | -2.55907500 | -3.97684900 |
| H         | 1.33337000  | -1.70382200 | -4.72115600 |
| H         | 2.45090800  | -0.52731000 | -4.04167700 |
| H         | 4.93260700  | -3.16267800 | -2.82239700 |
| H         | 4.66292600  | -1.42616100 | -2.86505500 |
| H         | 3.73292900  | -2.45155200 | -4.92266700 |
| H         | 2.77416800  | -3.57578800 | -3.96994400 |
| Au        | -0.86795700 | -0.31989300 | 0.02208800  |
| <b>21</b> |             |             |             |
| C         | 2.90425900  | -1.31752200 | -1.70486800 |
| C         | 3.33558400  | -0.05239400 | -1.85455400 |
| C         | 2.51235400  | 0.97754200  | -2.52369900 |
| H         | 1.49693700  | 0.64027400  | -2.74383700 |
| H         | 2.98852700  | 1.38583300  | -3.42140600 |
| O         | 2.39789100  | 2.21634200  | -1.66244000 |
| H         | 2.09414600  | 2.97057600  | -2.19972800 |
| C         | 3.64955900  | -2.43623300 | -1.11893400 |
| C         | 4.79053400  | -2.24671000 | -0.31571100 |
| C         | 3.20417400  | -3.74925600 | -1.35546300 |
| C         | 5.46617000  | -3.33950700 | 0.21925700  |
| H         | 5.13495000  | -1.24140300 | -0.09282500 |
| C         | 3.88561800  | -4.84311500 | -0.82406300 |
| H         | 2.32538800  | -3.91000600 | -1.97547700 |
| C         | 5.01957400  | -4.64054000 | -0.03530500 |
| H         | 6.34246600  | -3.17881800 | 0.83994800  |
| H         | 3.53451900  | -5.85037200 | -1.02668400 |
| H         | 5.55175400  | -5.48973700 | 0.38232500  |
| H         | 1.90787100  | -1.56601700 | -2.07156800 |
| H         | 4.32730500  | 0.25507700  | -1.54259600 |
| C         | 1.53435100  | 2.30728800  | -0.30035800 |
| C         | 1.09585500  | 3.75266900  | -0.34081800 |
| C         | 2.02851900  | 4.77720400  | -0.07853300 |
| C         | -0.21682900 | 4.11320300  | -0.69139900 |

|   |             |             |             |
|---|-------------|-------------|-------------|
| C | 1.65198900  | 6.11636800  | -0.14912800 |
| H | 3.05179700  | 4.52130400  | 0.18340200  |
| C | -0.59252800 | 5.45478900  | -0.76042200 |
| H | -0.94230400 | 3.33158300  | -0.89599000 |
| C | 0.33975500  | 6.45738500  | -0.48756100 |
| H | 2.38027200  | 6.89319800  | 0.06196400  |
| H | -1.61259800 | 5.71643400  | -1.02421000 |
| H | 0.04595400  | 7.50134100  | -0.53819500 |
| C | 2.59267000  | 2.04080100  | 0.75850100  |
| O | 3.74384600  | 1.71739000  | 0.55179600  |
| O | 2.04981700  | 2.21420700  | 1.97563500  |
| C | 2.92566700  | 2.01671200  | 3.12370300  |
| H | 2.49192800  | 2.65317700  | 3.89695800  |
| H | 3.92204300  | 2.38165500  | 2.86615300  |
| C | 2.96089100  | 0.55844900  | 3.54830400  |
| H | 1.95497000  | 0.19261900  | 3.77482100  |
| H | 3.57175000  | 0.45560100  | 4.45091100  |
| H | 3.40179800  | -0.06493000 | 2.76632800  |
| P | -1.76909600 | -0.78705400 | 0.22179300  |
| C | -3.13197200 | 0.12582100  | 1.22107900  |
| C | -4.17618200 | -0.75434200 | 1.93225100  |
| C | -3.80290500 | 1.23861400  | 0.39309000  |
| H | -2.52384900 | 0.61253300  | 1.99685900  |
| C | -5.10445100 | 0.11078700  | 2.80617100  |
| H | -4.77878000 | -1.29764100 | 1.19521700  |
| H | -3.68472700 | -1.50322500 | 2.56109100  |
| C | -4.73658900 | 2.09022200  | 1.27185400  |
| H | -4.38786700 | 0.79172800  | -0.42094800 |
| H | -3.04249900 | 1.87568800  | -0.07366900 |
| C | -5.77827100 | 1.22498000  | 1.99442400  |
| H | -5.85728200 | -0.52942400 | 3.27907100  |
| H | -4.51765300 | 0.55651000  | 3.62137700  |
| H | -5.22925900 | 2.84869900  | 0.65316200  |
| H | -4.13484200 | 2.63330100  | 2.01379300  |
| H | -6.39880400 | 1.84735500  | 2.64816900  |
| H | -6.45641200 | 0.77712000  | 1.25472600  |
| C | -1.13350100 | -2.20594500 | 1.35107500  |
| C | 0.35629400  | -2.49956800 | 1.08681100  |
| C | -1.95500100 | -3.50863800 | 1.29881300  |
| H | -1.22435500 | -1.77315900 | 2.35729100  |
| C | 0.90690100  | -3.54695400 | 2.06941800  |
| H | 0.47794800  | -2.87203500 | 0.06003300  |
| H | 0.94321700  | -1.57751700 | 1.15484000  |
| C | -1.40647400 | -4.54584000 | 2.29635200  |
| H | -1.90215900 | -3.93000900 | 0.28632900  |
| H | -3.01069100 | -3.31823600 | 1.50900200  |
| C | 0.07896800  | -4.83847000 | 2.05022300  |
| H | 1.95349000  | -3.75708900 | 1.82432100  |

|                     |             |             |             |
|---------------------|-------------|-------------|-------------|
| H                   | 0.89882700  | -3.12422600 | 3.08384300  |
| H                   | -1.99771400 | -5.46548500 | 2.22421600  |
| H                   | -1.54172300 | -4.16794000 | 3.31919400  |
| H                   | 0.45600300  | -5.54228700 | 2.80025100  |
| H                   | 0.19552800  | -5.33059600 | 1.07435600  |
| C                   | -2.42467100 | -1.55920800 | -1.40914200 |
| C                   | -2.31408000 | -0.56676300 | -2.58539200 |
| C                   | -3.83770600 | -2.17410900 | -1.35465900 |
| H                   | -1.70525600 | -2.37105400 | -1.58776300 |
| C                   | -2.66845700 | -1.24704200 | -3.91899600 |
| H                   | -2.99481100 | 0.27790200  | -2.41634700 |
| H                   | -1.30235800 | -0.14710100 | -2.63016200 |
| C                   | -4.18175100 | -2.86166300 | -2.68958500 |
| H                   | -4.57274500 | -1.38254600 | -1.16410900 |
| C                   | -3.92565700 | -2.89350700 | -0.53682800 |
| C                   | -4.05920300 | -1.89499500 | -3.87476700 |
| H                   | -2.61313800 | -0.51305400 | -4.73102000 |
| H                   | -1.91527300 | -2.01633000 | -4.14100800 |
| H                   | -5.19498600 | -3.27467700 | -2.63448200 |
| H                   | -3.50547000 | -3.71456700 | -2.84011200 |
| H                   | -4.26255700 | -2.41903400 | -4.81488100 |
| H                   | -4.82281500 | -1.11011900 | -3.78375700 |
| Au                  | 0.01643700  | 0.83077000  | -0.16920200 |
| TS <sub>21-22</sub> |             |             |             |
| C                   | 4.70465100  | -1.23306600 | 0.02435300  |
| C                   | 4.20210200  | -0.22840200 | -0.71683200 |
| C                   | 2.75433200  | 0.10734900  | -0.71702100 |
| H                   | 2.15052500  | -0.61972400 | -0.16598000 |
| H                   | 2.34479700  | 0.23668900  | -1.72207500 |
| O                   | 2.58259000  | 1.42824100  | -0.06707500 |
| H                   | 2.80816100  | 1.53437200  | 1.07893300  |
| C                   | 6.09409900  | -1.69234600 | 0.09703300  |
| C                   | 7.12903400  | -1.13637800 | -0.67971200 |
| C                   | 6.41055800  | -2.73639800 | 0.98454200  |
| C                   | 8.43198000  | -1.60803200 | -0.56437600 |
| H                   | 6.91517200  | -0.33569100 | -1.38088200 |
| C                   | 7.71634500  | -3.20878100 | 1.10025900  |
| C                   | 5.62215200  | -3.17764100 | 1.58929400  |
| C                   | 8.73102200  | -2.64505500 | 0.32592200  |
| H                   | 9.21880700  | -1.16995300 | -1.17086700 |
| H                   | 7.94103400  | -4.01496900 | 1.79176600  |
| H                   | 9.74958300  | -3.01103200 | 0.41156200  |
| H                   | 4.00871900  | -1.79331600 | 0.65107700  |
| H                   | 4.83804800  | 0.37272400  | -1.36136300 |
| C                   | 1.23915700  | 2.07201300  | 0.01511100  |
| C                   | 1.11302200  | 3.16239400  | -1.03305300 |
| C                   | 2.22561100  | 3.59785200  | -1.76660600 |

|   |             |             |             |
|---|-------------|-------------|-------------|
| C | -0.12799600 | 3.77950900  | -1.25701800 |
| C | 2.09461100  | 4.61896600  | -2.70995600 |
| H | 3.19513600  | 3.14343300  | -1.59839600 |
| C | -0.24990700 | 4.81168300  | -2.18616100 |
| H | -1.00052400 | 3.45005800  | -0.70096200 |
| C | 0.86009900  | 5.23193200  | -2.92176500 |
| H | 2.96589900  | 4.93930700  | -3.27340500 |
| H | -1.21721800 | 5.27960100  | -2.34296100 |
| H | 0.76192200  | 6.02711600  | -3.65414900 |
| C | 1.34706900  | 2.55910700  | 1.43028700  |
| O | 2.31582600  | 2.11063300  | 2.10089800  |
| O | 0.46858000  | 3.40330400  | 1.88592200  |
| C | 0.60542100  | 3.88256600  | 3.27243100  |
| H | 0.10976800  | 4.85315400  | 3.24652100  |
| H | 1.66833100  | 4.01705000  | 3.47912500  |
| C | -0.05437200 | 2.92623100  | 4.24711500  |
| H | -1.10677600 | 2.77133300  | 3.99409300  |
| H | -0.00534400 | 3.35465100  | 5.25304900  |
| H | 0.45924700  | 1.96179500  | 4.26527900  |
| P | -2.27064500 | -0.87777100 | -0.17326600 |
| C | -2.12306100 | -1.73770000 | -1.88352700 |
| C | -3.35618200 | -2.50572500 | -2.39404400 |
| C | -0.84640000 | -2.59668300 | -1.96598200 |
| H | -1.97945700 | -0.86737100 | -2.53969700 |
| C | -3.11484300 | -3.02029700 | -3.82666800 |
| H | -3.57228800 | -3.35672400 | -1.73783100 |
| H | -4.24040300 | -1.86067900 | -2.38694900 |
| C | -0.62203900 | -3.11192800 | -3.39843600 |
| H | -0.93449000 | -3.45446700 | -1.28674000 |
| H | 0.02225600  | -2.01561000 | -1.63316000 |
| C | -1.84563800 | -3.87730200 | -3.92065200 |
| H | -3.98969800 | -3.59021700 | -4.15830700 |
| H | -3.02615700 | -2.16176400 | -4.50673100 |
| H | 0.26945900  | -3.74863200 | -3.42286300 |
| H | -0.41578800 | -2.25821200 | -4.05890100 |
| H | -1.67946100 | -4.19448000 | -4.95577400 |
| H | -1.98018300 | -4.79522300 | -3.33129200 |
| C | -3.92920500 | 0.08682500  | -0.16117100 |
| C | -3.84142800 | 1.31668000  | 0.76667500  |
| C | -5.18014200 | -0.74889100 | 0.17420700  |
| H | -4.01315300 | 0.44441600  | -1.19718600 |
| C | -5.11986200 | 2.16978300  | 0.69090500  |
| H | -3.69045400 | 0.97906600  | 1.80249700  |
| H | -2.96880900 | 1.92636100  | 0.50610200  |
| C | -6.45443200 | 0.11104100  | 0.07776000  |
| H | -5.09574500 | -1.13877600 | 1.19701100  |
| H | -5.26838100 | -1.61343300 | -0.48913600 |
| C | -6.37742100 | 1.34305100  | 0.98838600  |

|           |             |             |             |
|-----------|-------------|-------------|-------------|
| H         | -5.03874100 | 3.01118200  | 1.38834000  |
| H         | -5.19862100 | 2.60592000  | -0.31470100 |
| H         | -7.32509000 | -0.50250500 | 0.33432000  |
| H         | -6.59518600 | 0.43182300  | -0.96365500 |
| H         | -7.27410500 | 1.96048200  | 0.86819300  |
| H         | -6.36047200 | 1.01837700  | 2.03824600  |
| C         | -2.29575300 | -2.10854400 | 1.29834300  |
| C         | -0.87621600 | -2.37476000 | 1.84084600  |
| C         | -3.04214700 | -3.43516300 | 1.05382400  |
| H         | -2.84281200 | -1.54163100 | 2.06501200  |
| C         | -0.92427700 | -3.22635400 | 3.12125400  |
| H         | -0.28483600 | -2.89838100 | 1.07746600  |
| H         | -0.36653000 | -1.42505100 | 2.03901100  |
| C         | -3.08739100 | -4.28073700 | 2.34051700  |
| H         | -2.52420600 | -4.00559400 | 0.27303400  |
| H         | -4.05830300 | -3.25432600 | 0.69412400  |
| C         | -1.68281000 | -4.54172700 | 2.89988200  |
| H         | 0.09624600  | -3.42478300 | 3.46827600  |
| H         | -1.41773200 | -2.65009200 | 3.91629200  |
| H         | -3.60019600 | -5.22661500 | 2.13396700  |
| H         | -3.69141100 | -3.75789500 | 3.09497800  |
| H         | -1.74696600 | -5.10474000 | 3.83726700  |
| H         | -1.12160300 | -5.17121600 | 2.19527000  |
| Au        | -0.39792300 | 0.67233800  | -0.01234400 |
| <b>22</b> |             |             |             |
| C         | 4.58037100  | -1.07214900 | -0.07151000 |
| C         | 4.23553600  | 0.15753800  | -0.48806300 |
| C         | 2.81792100  | 0.56475800  | -0.71175300 |
| H         | 2.12900600  | -0.27633700 | -0.55958300 |
| H         | 2.66542200  | 0.96314400  | -1.72287900 |
| O         | 2.49178800  | 1.61907900  | 0.23185500  |
| H         | 2.38167500  | 1.76373000  | 2.01577900  |
| C         | 5.92891200  | -1.60740700 | 0.15136600  |
| C         | 7.10233200  | -0.88220800 | -0.12986000 |
| C         | 6.05877200  | -2.90679700 | 0.67256600  |
| C         | 8.35483900  | -1.43771900 | 0.11072400  |
| H         | 7.03731100  | 0.11860000  | -0.54563800 |
| C         | 7.31327600  | -3.46392500 | 0.91397700  |
| H         | 5.16284000  | -3.48285300 | 0.89148400  |
| C         | 8.46635400  | -2.72992800 | 0.63450000  |
| H         | 9.24939400  | -0.86456000 | -0.11397300 |
| H         | 7.39022200  | -4.46901900 | 1.31759800  |
| H         | 9.44602800  | -3.16022100 | 0.81860400  |
| H         | 3.77448300  | -1.78075700 | 0.12751400  |
| H         | 4.98918800  | 0.91317100  | -0.69854400 |
| C         | 1.20483900  | 2.23373000  | 0.11859400  |
| C         | 1.09307800  | 3.23402100  | -1.01951900 |

|   |             |             |             |
|---|-------------|-------------|-------------|
| C | 2.26368200  | 3.80105300  | -1.54583300 |
| C | -0.14559400 | 3.63734500  | -1.53753400 |
| C | 2.19342600  | 4.74400700  | -2.57156100 |
| H | 3.22726800  | 3.50566300  | -1.14477800 |
| C | -0.21347000 | 4.59178300  | -2.55301600 |
| H | -1.06024600 | 3.20250100  | -1.14506400 |
| C | 0.95589400  | 5.14428800  | -3.07776500 |
| H | 3.10902400  | 5.17081900  | -2.96998000 |
| H | -1.18144900 | 4.89469500  | -2.94093400 |
| H | 0.90312400  | 5.87819700  | -3.87593100 |
| C | 0.95884600  | 2.75584900  | 1.45392900  |
| O | 1.68752400  | 2.32446800  | 2.45114300  |
| O | 0.05886500  | 3.65944300  | 1.68296400  |
| C | -0.15459000 | 4.17308500  | 3.04950100  |
| H | -0.59445300 | 5.15336100  | 2.86700700  |
| H | 0.82096400  | 4.29310400  | 3.52284100  |
| C | -1.07874000 | 3.26989000  | 3.84295200  |
| H | -2.03466600 | 3.13754800  | 3.32949100  |
| H | -1.27558600 | 3.73632300  | 4.81332000  |
| H | -0.62628500 | 2.29193200  | 4.02500100  |
| P | -2.12779900 | -0.97781100 | -0.19440300 |
| C | -1.87351500 | -1.72954800 | -1.94198200 |
| C | -3.02304300 | -2.57892200 | -2.51576100 |
| C | -0.52340500 | -2.46534600 | -2.04268200 |
| H | -1.80002000 | -0.81626900 | -2.54954300 |
| C | -2.71389000 | -2.98715200 | -3.96949700 |
| H | -3.16502300 | -3.48146700 | -1.91041100 |
| H | -3.96497700 | -2.02179300 | -2.49035400 |
| C | -0.22898400 | -2.87458600 | -3.49650400 |
| H | -0.54617500 | -3.36598700 | -1.41539800 |
| H | 0.28388200  | -1.83061300 | -1.65841400 |
| C | -1.36886200 | -3.71616800 | -4.08684300 |
| H | -3.52677100 | -3.61609300 | -4.34871700 |
| H | -2.69694100 | -2.08675400 | -4.59907500 |
| H | 0.71715400  | -3.42569400 | -3.53682200 |
| H | -0.09034000 | -1.96922100 | -4.10362000 |
| H | -1.15883900 | -3.95432300 | -5.13507800 |
| H | -1.42609300 | -4.67616400 | -3.55488200 |
| C | -3.86910900 | -0.17222100 | -0.16903900 |
| C | -3.90706900 | 1.02326800  | 0.80440100  |
| C | -5.03377000 | -1.13950600 | 0.12287800  |
| H | -3.97863000 | 0.21393400  | -1.19202600 |
| C | -5.26402300 | 1.74699400  | 0.75259800  |
| H | -3.72570600 | 0.66232300  | 1.82733200  |
| H | -3.09858900 | 1.72517500  | 0.57040700  |
| C | -6.38730200 | -0.40733300 | 0.05331400  |
| H | -4.91248000 | -1.56011900 | 1.12966200  |
| H | -5.03329600 | -1.98101600 | -0.57519200 |

|    |             |             |             |
|----|-------------|-------------|-------------|
| C  | -6.43344500 | 0.78822500  | 1.01253500  |
| H  | -5.26939500 | 2.56643800  | 1.48033800  |
| H  | -5.38409900 | 2.20868700  | -0.23730500 |
| H  | -7.19262400 | -1.11427000 | 0.28093700  |
| H  | -6.55792100 | -0.06060200 | -0.97515600 |
| H  | -7.38674400 | 1.31824300  | 0.91322400  |
| H  | -6.38395500 | 0.42526100  | 2.04864300  |
| C  | -2.05631500 | -2.27313300 | 1.21993900  |
| C  | -0.62753300 | -2.43069300 | 1.77882100  |
| C  | -2.66860600 | -3.65202300 | 0.90152000  |
| H  | -2.66884700 | -1.79620100 | 1.99836300  |
| C  | -0.61913200 | -3.33645000 | 3.02226600  |
| H  | 0.02163600  | -2.86573400 | 1.00704800  |
| H  | -0.20913900 | -1.44810400 | 2.02510200  |
| C  | -2.66247800 | -4.54988200 | 2.15299400  |
| H  | -2.08146000 | -4.13772900 | 0.11239800  |
| H  | -3.68927500 | -3.55326400 | 0.52347400  |
| C  | -1.25152900 | -4.70524000 | 2.73506500  |
| H  | 0.40966500  | -3.45578700 | 3.38036800  |
| H  | -1.17488500 | -2.84040500 | 3.83036400  |
| H  | -3.08315100 | -5.52881000 | 1.89808900  |
| H  | -3.32645100 | -4.11388500 | 2.91226000  |
| H  | -1.28255400 | -5.30756700 | 3.64934400  |
| H  | -0.62212500 | -5.25401900 | 2.02066300  |
| Au | -0.40556400 | 0.72798800  | 0.06578100  |

TS<sub>22-23</sub>

|   |             |             |             |
|---|-------------|-------------|-------------|
| C | 1.14793300  | -3.00574400 | 0.85819900  |
| C | -0.08516000 | -3.23434500 | 0.30155400  |
| C | -1.28670400 | -3.51429000 | 1.16965400  |
| H | -1.19969000 | -3.00927800 | 2.13928600  |
| H | -1.37765200 | -4.59097000 | 1.35348400  |
| O | -2.52422100 | -3.16285100 | 0.53539100  |
| H | -2.84259000 | -3.54077900 | -1.29516500 |
| C | 2.46487600  | -3.17196800 | 0.24693000  |
| C | 2.65131400  | -3.59629900 | -1.08450600 |
| C | 3.60379300  | -2.93942000 | 1.04222500  |
| C | 3.93154600  | -3.77269400 | -1.59753300 |
| H | 1.79368800  | -3.79907300 | -1.71857300 |
| C | 4.88606700  | -3.11979600 | 0.52804000  |
| H | 3.47614200  | -2.62582100 | 2.07519400  |
| C | 5.05360400  | -3.53589200 | -0.79409900 |
| H | 4.05950800  | -4.10646500 | -2.62267700 |
| H | 5.75176700  | -2.94411000 | 1.15899100  |
| H | 6.05089400  | -3.68536600 | -1.19621700 |
| H | 1.16700700  | -2.74985400 | 1.91817900  |
| H | -0.14537000 | -3.61133800 | -0.71921400 |
| C | -2.69650400 | -1.79902800 | 0.20292600  |

|   |             |             |             |
|---|-------------|-------------|-------------|
| C | -3.22074600 | -0.91813200 | 1.28560200  |
| C | -3.56356500 | -1.48687900 | 2.52527400  |
| C | -3.40639800 | 0.46756000  | 1.11391600  |
| C | -4.06242300 | -0.69556000 | 3.56055100  |
| H | -3.47095800 | -2.55736800 | 2.66681800  |
| C | -3.91747900 | 1.24905700  | 2.14837000  |
| H | -3.16270100 | 0.92868300  | 0.16493300  |
| C | -4.24024600 | 0.67606900  | 3.38104700  |
| H | -4.32625100 | -1.16040700 | 4.50593900  |
| H | -4.06782400 | 2.31317600  | 1.98878100  |
| H | -4.63471200 | 1.28918500  | 4.18524900  |
| C | -3.08913100 | -1.72084700 | -1.14404000 |
| O | -3.03326100 | -2.80503700 | -1.91503700 |
| O | -3.56508000 | -0.62462700 | -1.69785000 |
| C | -4.18969100 | -0.69503500 | -3.02448800 |
| H | -4.84713100 | 0.17528500  | -3.02716500 |
| H | -4.79614000 | -1.60134400 | -3.07169600 |
| C | -3.17061600 | -0.63411800 | -4.14788600 |
| H | -2.55944200 | 0.26944000  | -4.07763100 |
| H | -3.70160500 | -0.61055500 | -5.10496600 |
| H | -2.51849900 | -1.51019300 | -4.14373300 |
| P | 0.62093900  | 1.43271600  | -0.04210200 |
| C | 0.87709400  | 1.82288800  | 1.82558200  |
| C | 1.12666100  | 3.29186800  | 2.21542300  |
| C | 1.93016600  | 0.88859300  | 2.45278400  |
| H | -0.10494400 | 1.53733900  | 2.22753500  |
| C | 1.17369100  | 3.44177600  | 3.74875000  |
| H | 2.07281300  | 3.64355500  | 1.78839100  |
| H | 0.33428400  | 3.93366700  | 1.81909800  |
| C | 1.97366900  | 1.05384000  | 3.98200600  |
| H | 2.92063500  | 1.11882900  | 2.04033700  |
| H | 1.71446200  | -0.15361500 | 2.19172900  |
| C | 2.21712500  | 2.51445900  | 4.38457800  |
| H | 1.38151900  | 4.48690400  | 4.00335300  |
| H | 0.18177600  | 3.21126300  | 4.16159600  |
| H | 2.75344300  | 0.40585300  | 4.39851800  |
| H | 1.02032100  | 0.71156600  | 4.40842100  |
| H | 2.19797200  | 2.61496500  | 5.47515600  |
| H | 3.22230300  | 2.81903600  | 4.06099300  |
| C | -0.58580900 | 2.75276900  | -0.74071100 |
| C | -1.32738800 | 2.21255000  | -1.97893800 |
| C | 0.05177900  | 4.11962300  | -1.06344000 |
| H | -1.31366500 | 2.88275400  | 0.07194400  |
| C | -2.38462900 | 3.21352400  | -2.47762100 |
| H | -0.59930600 | 2.02579100  | -2.78212500 |
| H | -1.79712800 | 1.25100400  | -1.75149000 |
| C | -1.01396200 | 5.12196300  | -1.54400800 |
| H | 0.79828600  | 3.99285400  | -1.85774900 |

|           |             |             |             |
|-----------|-------------|-------------|-------------|
| H         | 0.57649000  | 4.53018700  | -0.19771100 |
| C         | -1.77835400 | 4.59359900  | -2.76418900 |
| H         | -2.87105300 | 2.81675200  | -3.37661300 |
| H         | -3.17104400 | 3.31186900  | -1.71595300 |
| H         | -0.53262500 | 6.07810700  | -1.77723100 |
| H         | -1.71970800 | 5.32011000  | -0.72533400 |
| H         | -2.56306400 | 5.29955400  | -3.05691600 |
| H         | -1.09105700 | 4.51853000  | -3.61843000 |
| C         | 2.22549600  | 1.57350300  | -1.08968200 |
| C         | 2.91967500  | 0.21011600  | -1.25610200 |
| C         | 3.23474200  | 2.64873700  | -0.63607700 |
| H         | 1.83050600  | 1.86965800  | -2.07190000 |
| C         | 4.09956100  | 0.30501000  | -2.23758000 |
| H         | 3.28372100  | -0.13986900 | -0.28193500 |
| H         | 2.19993400  | -0.53871200 | -1.60388000 |
| C         | 4.40909900  | 2.74150500  | -1.62882400 |
| H         | 3.62815200  | 2.38685900  | 0.35367700  |
| H         | 2.75731500  | 3.62728800  | -0.53956600 |
| C         | 5.10372400  | 1.38690700  | -1.81701600 |
| H         | 4.59116600  | -0.67123500 | -2.30705800 |
| H         | 3.71540300  | 0.53562900  | -3.24141600 |
| H         | 5.12251800  | 3.49435800  | -1.27544200 |
| H         | 4.03438300  | 3.09912200  | -2.59797200 |
| H         | 5.90439700  | 1.47229800  | -2.55982000 |
| H         | 5.58305700  | 1.09070600  | -0.87338500 |
| Au        | -0.34709100 | -0.82128700 | -0.05566000 |
| <b>23</b> |             |             |             |
| C         | 0.25562300  | -2.93532800 | 1.64973600  |
| C         | -1.04596600 | -2.68639700 | 1.24580700  |
| C         | -2.11403800 | -2.23283500 | 2.22921500  |
| H         | -1.77254800 | -1.38088700 | 2.82958100  |
| H         | -2.33407100 | -3.05986900 | 2.91506900  |
| O         | -3.36496200 | -1.94581800 | 1.60670200  |
| C         | -3.90343800 | -3.04607100 | -0.03296400 |
| H         | 1.25984600  | -3.78997700 | 0.99730600  |
| C         | 1.03857300  | -4.43593100 | -0.23503500 |
| C         | 2.48664800  | -3.99031500 | 1.65633800  |
| C         | 2.01957000  | -5.25250100 | -0.78630100 |
| H         | 0.09800100  | -4.30622700 | -0.76181200 |
| C         | 3.46617200  | -4.81339300 | 1.10371500  |
| H         | 2.66513200  | -3.50490700 | 2.61247500  |
| C         | 3.23573100  | -5.44407400 | -0.11975200 |
| H         | 1.83585800  | -5.74941200 | -1.73375400 |
| H         | 4.40371100  | -4.96548600 | 1.62901500  |
| H         | 3.99533100  | -6.08798100 | -0.55192100 |
| H         | 0.53562200  | -2.59436600 | 2.64793100  |
| H         | -1.42457500 | -3.15801900 | 0.34075100  |

|   |             |             |             |
|---|-------------|-------------|-------------|
| C | -3.38551800 | -0.87018500 | 0.69814600  |
| C | -3.41188400 | 0.49266400  | 1.24553700  |
| C | -3.65405300 | 0.67479900  | 2.62231300  |
| C | -3.24309900 | 1.64320500  | 0.44564100  |
| C | -3.72348300 | 1.95230000  | 3.17690000  |
| H | -3.83130100 | -0.19241300 | 3.24903200  |
| C | -3.33324400 | 2.91713500  | 1.00499200  |
| H | -3.07210500 | 1.53023600  | -0.61764300 |
| C | -3.56662300 | 3.08298200  | 2.37323700  |
| H | -3.92439300 | 2.06249100  | 4.23862400  |
| H | -3.22784000 | 3.78836100  | 0.36391600  |
| H | -3.64157300 | 4.07737100  | 2.80239500  |
| C | -3.60378900 | -1.28081300 | -0.58333500 |
| O | -3.76200200 | -2.59541600 | -0.88412400 |
| O | -3.67240300 | -0.45709800 | -1.63503500 |
| C | -4.75797800 | -0.68318800 | -2.59263100 |
| H | -5.06618300 | 0.32341500  | -2.88524700 |
| H | -5.59031300 | -1.16472600 | -2.07257000 |
| C | -4.30013400 | -1.49309600 | -3.79161700 |
| H | -3.45027200 | -1.01197800 | -4.28394800 |
| H | -5.11756800 | -1.56047000 | -4.51722400 |
| H | -4.01461400 | -2.50502300 | -3.49719800 |
| P | 1.08704400  | 1.18470200  | -0.40259200 |
| C | 0.64715600  | 2.55727900  | 0.86102500  |
| C | 0.85911500  | 4.00908800  | 0.39170200  |
| C | 1.30529900  | 2.30296100  | 2.23087700  |
| H | -0.43371400 | 2.39932100  | 0.97190500  |
| C | 0.33522800  | 4.99430300  | 1.45505200  |
| H | 1.92304200  | 4.20328600  | 0.21512400  |
| H | 0.33735500  | 4.18713400  | -0.55414300 |
| C | 0.78027000  | 3.29966100  | 3.28000600  |
| H | 2.39417100  | 2.41249800  | 2.14683600  |
| H | 1.11293500  | 1.27484300  | 2.56186600  |
| C | 0.98088900  | 4.75212500  | 2.82562800  |
| H | 0.51897600  | 6.02047300  | 1.11805700  |
| H | -0.75353500 | 4.88037800  | 1.54148900  |
| H | 1.28564700  | 3.12184200  | 4.23591400  |
| H | -0.28895500 | 3.11286200  | 3.44742100  |
| H | 0.56243000  | 5.44131100  | 3.56708900  |
| H | 2.05611800  | 4.97203100  | 2.76788800  |
| C | 0.27003400  | 1.65121700  | -2.07477900 |
| C | -0.12410300 | 0.38919200  | -2.86908200 |
| C | 1.10544100  | 2.60874100  | -2.94851300 |
| H | -0.64887700 | 2.16657700  | -1.76382800 |
| C | -0.84957800 | 0.75440000  | -4.17576300 |
| H | 0.77944000  | -0.19149800 | -3.10407200 |
| H | -0.76967700 | -0.25289700 | -2.25964900 |
| C | 0.35240900  | 2.97492800  | -4.24047300 |

|                     |             |             |             |
|---------------------|-------------|-------------|-------------|
| H                   | 2.05126900  | 2.12246100  | -3.22022300 |
| H                   | 1.36123800  | 3.52028500  | -2.40108000 |
| C                   | -0.03429100 | 1.72478100  | -5.03971500 |
| H                   | -1.07153100 | -0.16240300 | -4.73360600 |
| H                   | -1.81663800 | 1.21215600  | -3.92643800 |
| H                   | 0.97688700  | 3.64182300  | -4.84497000 |
| H                   | -0.55281700 | 3.54242900  | -3.98409300 |
| H                   | -0.60250500 | 2.00543900  | -5.93310700 |
| H                   | 0.87674400  | 1.22269700  | -5.39396600 |
| C                   | 2.97512400  | 0.96646700  | -0.68989700 |
| C                   | 3.59553300  | -0.05275600 | 0.28674600  |
| C                   | 3.79190500  | 2.27448100  | -0.70260700 |
| H                   | 3.00791700  | 0.52670700  | -1.69654000 |
| C                   | 5.06900300  | -0.32419300 | -0.06524200 |
| H                   | 3.53062700  | 0.33553800  | 1.31190800  |
| H                   | 3.03039600  | -0.99104200 | 0.26562600  |
| C                   | 5.26254200  | 1.99132900  | -1.06356700 |
| H                   | 3.75355400  | 2.73649100  | 0.29106100  |
| H                   | 3.37196600  | 2.99686100  | -1.40693800 |
| C                   | 5.89406400  | 0.96879400  | -0.11047900 |
| H                   | 5.49242100  | -1.02639100 | 0.66160100  |
| H                   | 5.11657300  | -0.82195200 | -1.04382100 |
| H                   | 5.82496600  | 2.93130000  | -1.04781400 |
| H                   | 5.31470600  | 1.61411100  | -2.09426200 |
| H                   | 6.92307400  | 0.75084400  | -0.41588100 |
| H                   | 5.95237700  | 1.39963900  | 0.89869600  |
| Au                  | 0.14277800  | -0.87050900 | 0.45999000  |
| TS <sub>23-24</sub> |             |             |             |
| C                   | -2.43515500 | -0.05459000 | 0.06055000  |
| C                   | -1.55601400 | 0.37362100  | 1.14896100  |
| C                   | -1.91122800 | 1.78924500  | 1.51382600  |
| H                   | -1.70189600 | 2.50893700  | 0.71671600  |
| H                   | -1.47329300 | 2.14036000  | 2.44843300  |
| O                   | -3.37899600 | 1.79593100  | 1.73465400  |
| H                   | -4.13446100 | 0.50124800  | 2.86691100  |
| C                   | -2.75128600 | -1.47036500 | -0.21644100 |
| C                   | -2.65823400 | -2.47772300 | 0.76404600  |
| C                   | -3.12858700 | -1.84286300 | -1.52140400 |
| C                   | -2.92008200 | -3.80791600 | 0.44354700  |
| H                   | -2.36574500 | -2.22644300 | 1.77828400  |
| C                   | -3.39880100 | -3.17276500 | -1.83906900 |
| H                   | -3.19186900 | -1.08030000 | -2.29274100 |
| C                   | -3.29281400 | -4.16071600 | -0.85716700 |
| H                   | -2.83032900 | -4.57314700 | 1.20881800  |
| H                   | -3.68019400 | -3.43945500 | -2.85327800 |
| H                   | -3.49218700 | -5.19910000 | -1.10398200 |
| H                   | -2.38751900 | 0.54955800  | -0.84303200 |

|   |             |             |             |
|---|-------------|-------------|-------------|
| H | -1.62858800 | -0.27559700 | 2.02811600  |
| C | -4.05546600 | 1.15912800  | 0.69429800  |
| C | -4.44963600 | 1.99878300  | -0.47393900 |
| C | -4.26169700 | 3.38875400  | -0.40791500 |
| C | -4.98780300 | 1.44084100  | -1.64663100 |
| C | -4.60314300 | 4.20044200  | -1.48960700 |
| H | -3.86853000 | 3.82986300  | 0.50121900  |
| C | -5.33328600 | 2.25914500  | -2.72110400 |
| H | -5.14314200 | 0.37057700  | -1.71734200 |
| C | -5.13985200 | 3.64036300  | -2.64946500 |
| H | -4.45710100 | 5.27415600  | -1.41971500 |
| H | -5.75354900 | 1.81457400  | -3.61834200 |
| H | -5.40842200 | 4.27378500  | -3.48916300 |
| C | -4.94312800 | 0.19380900  | 1.25818200  |
| O | -4.79641100 | -0.14345000 | 2.52024000  |
| O | -5.86371800 | -0.39367400 | 0.56016000  |
| C | -6.86345300 | -1.26590400 | 1.20970200  |
| H | -7.73247600 | -1.14996100 | 0.56156700  |
| H | -7.08465000 | -0.84962900 | 2.19376300  |
| C | -6.38897100 | -2.70235800 | 1.27817100  |
| H | -6.11285300 | -3.07280100 | 0.28819700  |
| H | -7.20591700 | -3.32103300 | 1.66309400  |
| H | -5.53267700 | -2.80903800 | 1.94669600  |
| P | 2.80335100  | -0.00109800 | -0.20788700 |
| C | 3.44488100  | 1.76806900  | -0.58263600 |
| C | 4.75970700  | 1.88201000  | -1.37647100 |
| C | 3.47430900  | 2.63833300  | 0.68885800  |
| H | 2.63656800  | 2.14855500  | -1.22338100 |
| C | 5.06232100  | 3.35552900  | -1.71038800 |
| H | 5.59000100  | 1.46722800  | -0.79358600 |
| H | 4.70096000  | 1.30759100  | -2.30646300 |
| C | 3.78979400  | 4.10500100  | 0.34511600  |
| H | 4.24108200  | 2.26106600  | 1.37751400  |
| H | 2.51440100  | 2.57211200  | 1.21472200  |
| C | 5.09609200  | 4.23110400  | -0.45149800 |
| H | 6.01517200  | 3.41723700  | -2.24772500 |
| H | 4.29217400  | 3.73381100  | -2.39699800 |
| H | 3.84333900  | 4.69341500  | 1.26796900  |
| H | 2.96126100  | 4.52191500  | -0.24449100 |
| H | 5.27435600  | 5.27737900  | -0.72280500 |
| H | 5.94013800  | 3.92567200  | 0.18267200  |
| C | 2.92947600  | -0.99542400 | -1.84609700 |
| C | 1.83166500  | -2.07640500 | -1.91865600 |
| C | 4.31120900  | -1.61259700 | -2.13843100 |
| H | 2.71431300  | -0.23801800 | -2.61309600 |
| C | 1.84609600  | -2.79901400 | -3.27688800 |
| H | 1.98972900  | -2.81109000 | -1.11586300 |
| H | 0.84747200  | -1.62875300 | -1.74159100 |

|           |             |             |             |
|-----------|-------------|-------------|-------------|
| C         | 4.31961600  | -2.32581400 | -3.50355000 |
| H         | 4.55509700  | -2.34407000 | -1.35696700 |
| H         | 5.09629700  | -0.85192200 | -2.11818000 |
| C         | 3.22421500  | -3.39560100 | -3.59162000 |
| H         | 1.07785100  | -3.58051400 | -3.28220900 |
| H         | 1.57029600  | -2.08393200 | -4.06476400 |
| H         | 5.30634800  | -2.77092300 | -3.67338100 |
| H         | 4.17225900  | -1.58264300 | -4.29945900 |
| H         | 3.22143000  | -3.85516900 | -4.58607200 |
| H         | 3.44394800  | -4.20025200 | -2.87603200 |
| C         | 3.84751000  | -0.91932300 | 1.11691000  |
| C         | 3.28289800  | -0.69682600 | 2.53532300  |
| C         | 5.36544600  | -0.65327100 | 1.08908900  |
| H         | 3.67731100  | -1.97296100 | 0.85319900  |
| C         | 4.01505900  | -1.57533700 | 3.56406500  |
| C         | 3.39568800  | 0.35942200  | 2.81313800  |
| H         | 2.20846300  | -0.91199600 | 2.55190800  |
| C         | 6.09295900  | -1.53702300 | 2.11985700  |
| H         | 5.55339400  | 0.40023200  | 1.32938700  |
| H         | 5.77933300  | -0.83123100 | 0.09336900  |
| C         | 5.53153500  | -1.34189300 | 3.53452700  |
| H         | 3.61532900  | -1.37693400 | 4.56494200  |
| H         | 3.80478600  | -2.63208600 | 3.34708000  |
| H         | 7.16513800  | -1.31209700 | 2.09750300  |
| H         | 5.99009200  | -2.59113500 | 1.82698100  |
| H         | 6.03312600  | -2.01582500 | 4.23755900  |
| H         | 5.74854900  | -0.31930000 | 3.87354000  |
| Au        | 0.47589300  | 0.19319000  | 0.49226500  |
| <b>24</b> |             |             |             |
| C         | -2.57144200 | 0.18016900  | -0.04412200 |
| C         | -1.51985900 | 0.60805900  | 0.99243000  |
| C         | -1.91537500 | 2.03322500  | 1.27007500  |
| H         | -1.65505200 | 2.73189400  | 0.46983400  |
| H         | -1.58581300 | 2.43540800  | 2.22929500  |
| O         | -3.40716700 | 2.00925400  | 1.32354900  |
| H         | -4.16572100 | 1.32425000  | 2.56516700  |
| C         | -2.71468200 | -1.30995000 | -0.28567100 |
| C         | -2.70498500 | -2.24207600 | 0.76371700  |
| C         | -2.81416000 | -1.79360800 | -1.59896400 |
| C         | -2.80038800 | -3.61098700 | 0.50792900  |
| H         | -2.59948600 | -1.90667000 | 1.79211800  |
| C         | -2.91497100 | -3.16193900 | -1.85860800 |
| H         | -2.80314300 | -1.09036500 | -2.42737000 |
| C         | -2.91043500 | -4.07621400 | -0.80468400 |
| H         | -2.77534000 | -4.31566900 | 1.33434400  |
| H         | -2.98848200 | -3.51139300 | -2.88414300 |
| H         | -2.98088100 | -5.14132000 | -1.00300900 |

|   |             |             |             |
|---|-------------|-------------|-------------|
| H | -2.34862700 | 0.65382100  | -1.00449500 |
| H | -1.66448700 | 0.03194800  | 1.91660900  |
| C | -3.89592000 | 0.99460200  | 0.42998500  |
| C | -4.69786800 | 1.60430900  | -0.72455300 |
| C | -4.86276600 | 2.99256100  | -0.79739400 |
| C | -5.25556500 | 0.78895800  | -1.72086400 |
| C | -5.56483900 | 3.55941300  | -1.86295200 |
| H | -4.44167600 | 3.62326600  | -0.02373100 |
| C | -5.95927900 | 1.36233000  | -2.77954800 |
| H | -5.14209300 | -0.28831400 | -1.67604200 |
| C | -6.11515900 | 2.74815600  | -2.85489600 |
| H | -5.68317700 | 4.63754600  | -1.91152700 |
| H | -6.38526700 | 0.72349900  | -3.54726100 |
| H | -6.66326200 | 3.19086000  | -3.68079000 |
| C | -4.82548600 | 0.20769900  | 1.33962100  |
| O | -4.82220400 | 0.53919500  | 2.58164800  |
| O | -5.59601100 | -0.70482400 | 0.89617000  |
| C | -6.59816700 | -1.36228600 | 1.78487200  |
| H | -7.36243400 | -1.67157200 | 1.07298200  |
| H | -6.99507600 | -0.59235700 | 2.44810300  |
| C | -5.98707200 | -2.53075600 | 2.52792100  |
| H | -5.52463600 | -3.23747500 | 1.83580600  |
| H | -6.78729100 | -3.04676400 | 3.06773200  |
| H | -5.24497300 | -2.20146800 | 3.25902500  |
| P | 2.83903000  | 0.03866900  | -0.20867400 |
| C | 3.55964500  | 1.77471400  | -0.59647800 |
| C | 4.89388700  | 1.83314800  | -1.36302000 |
| C | 3.59426900  | 2.66096600  | 0.66422900  |
| H | 2.77970500  | 2.17714900  | -1.25872400 |
| C | 5.25710400  | 3.29035300  | -1.70770400 |
| H | 5.69691700  | 1.39602000  | -0.75845600 |
| H | 4.83361100  | 1.24964900  | -2.28720600 |
| C | 3.96887800  | 4.11098000  | 0.31040500  |
| H | 4.33329300  | 2.26598700  | 1.37311700  |
| H | 2.62249600  | 2.63454500  | 1.17118900  |
| C | 5.29559100  | 4.18033900  | -0.45882500 |
| H | 6.22285200  | 3.31180400  | -2.22503100 |
| H | 4.51577900  | 3.68776800  | -2.41502600 |
| H | 4.02391900  | 4.70941200  | 1.22689200  |
| H | 3.16881100  | 4.54965000  | -0.30240100 |
| H | 5.51801400  | 5.21605000  | -0.73845800 |
| H | 6.11397300  | 3.85218600  | 0.19738300  |
| C | 2.97835000  | -0.98655500 | -1.82692300 |
| C | 1.84974600  | -2.03522600 | -1.90549700 |
| C | 4.34467700  | -1.65160600 | -2.08237600 |
| H | 2.80156100  | -0.23729900 | -2.61173500 |
| C | 1.86791000  | -2.78003400 | -3.25143600 |
| H | 1.96984000  | -2.76150900 | -1.08846000 |

|                     |             |             |             |
|---------------------|-------------|-------------|-------------|
| H                   | 0.87663000  | -1.55607800 | -1.75354500 |
| C                   | 4.35847200  | -2.38629500 | -3.43585600 |
| H                   | 4.54927600  | -2.37804200 | -1.28504900 |
| H                   | 5.15364700  | -0.91656800 | -2.05703100 |
| C                   | 3.23256700  | -3.42373200 | -3.52992300 |
| H                   | 1.07580900  | -3.53755600 | -3.25978600 |
| H                   | 1.62995500  | -2.06985100 | -4.05609600 |
| H                   | 5.33411800  | -2.86404200 | -3.57991800 |
| H                   | 4.24898500  | -1.65161300 | -4.24577500 |
| H                   | 3.23535300  | -3.89928900 | -4.51699500 |
| H                   | 3.41341700  | -4.22272400 | -2.79723600 |
| C                   | 3.82917600  | -0.89210100 | 1.14917500  |
| C                   | 3.24942900  | -0.61926100 | 2.55254200  |
| C                   | 5.35703000  | -0.69004500 | 1.14486800  |
| H                   | 3.62049300  | -1.94349300 | 0.90394000  |
| C                   | 3.92773300  | -1.50426200 | 3.61223700  |
| H                   | 3.39884700  | 0.43741400  | 2.81102400  |
| H                   | 2.16728300  | -0.79058100 | 2.55237100  |
| C                   | 6.03033200  | -1.58110200 | 2.20556900  |
| H                   | 5.58538200  | 0.35944200  | 1.36730800  |
| H                   | 5.78104000  | -0.90568400 | 0.16094800  |
| C                   | 5.45310200  | -1.33457700 | 3.60558100  |
| H                   | 3.52000500  | -1.26868000 | 4.60196000  |
| H                   | 3.67754000  | -2.55605300 | 3.41365200  |
| H                   | 7.11127600  | -1.40103400 | 2.19856700  |
| H                   | 5.88902700  | -2.63605000 | 1.93199500  |
| H                   | 5.91408300  | -2.01399400 | 4.33103300  |
| H                   | 5.70647300  | -0.31499600 | 3.92838500  |
| Au                  | 0.49124300  | 0.33741400  | 0.42694300  |
| TS <sub>24-25</sub> |             |             |             |
| C                   | -2.55870100 | 0.18102800  | 0.02977200  |
| C                   | -1.55501200 | 0.01686000  | 1.18602800  |
| C                   | -1.98523800 | 1.08969000  | 2.13938000  |
| C                   | -1.73033400 | 2.10548800  | 1.83317800  |
| H                   | -1.73017100 | 0.93690500  | 3.18866600  |
| O                   | -3.50835300 | 1.06617600  | 2.08270600  |
| H                   | -4.05155900 | 0.12282800  | 2.70008000  |
| C                   | -2.61718800 | -0.95018000 | -0.97968500 |
| C                   | -2.54797700 | -2.29847300 | -0.59687800 |
| C                   | -2.70005700 | -0.65233200 | -2.34790000 |
| C                   | -2.57300000 | -3.31587000 | -1.55173700 |
| H                   | -2.45405400 | -2.56546100 | 0.45192800  |
| C                   | -2.72907000 | -1.66800800 | -3.30579100 |
| H                   | -2.73575200 | 0.38599200  | -2.66656100 |
| C                   | -2.66817600 | -3.00446700 | -2.91014900 |
| H                   | -2.50586500 | -4.35275200 | -1.23478900 |
| H                   | -2.79151100 | -1.41266300 | -4.35937100 |



|   |             |             |             |
|---|-------------|-------------|-------------|
| H | -2.68475500 | -3.79656300 | -3.65249800 |
| H | -2.32866800 | 1.10063100  | -0.51749900 |
| H | -1.70804500 | -0.95613800 | 1.67090400  |
| C | -3.93265200 | 0.55767100  | 0.77318200  |
| C | -4.79347700 | 1.58609200  | 0.04828400  |
| C | -4.97229600 | 2.86705100  | 0.58553400  |
| C | -5.38752100 | 1.26423200  | -1.18177600 |
| C | -5.72757400 | 3.81671100  | -0.10470500 |
| H | -4.52838500 | 3.11967900  | 1.54105400  |
| C | -6.14335100 | 2.21802200  | -1.86292700 |
| H | -5.26135500 | 0.27660200  | -1.60979800 |
| C | -6.31500300 | 3.49638200  | -1.32837300 |
| H | -5.85888300 | 4.80651000  | 0.32153600  |
| H | -6.59885300 | 1.95885800  | -2.81377600 |
| H | -6.90485500 | 4.23572900  | -1.86112600 |
| C | -4.77207900 | -0.63599400 | 1.24974000  |
| O | -4.74136300 | -0.82677800 | 2.49613800  |
| O | -5.46802200 | -1.32524900 | 0.42095300  |
| C | -6.37466400 | -2.38645700 | 0.93202900  |
| H | -7.14139100 | -2.43084900 | 0.15916700  |
| H | -6.80652200 | -2.02345600 | 1.86594500  |
| C | -5.63913500 | -3.70009800 | 1.09588100  |
| H | -5.15917300 | -3.99967500 | 0.16162800  |
| H | -6.36553100 | -4.47022800 | 1.37355400  |
| H | -4.88901400 | -3.64322800 | 1.88843600  |
| P | 2.86681100  | 0.25177500  | 0.11198600  |
| C | 3.81808600  | -0.60018700 | 1.54592000  |
| C | 5.33453500  | -0.34973600 | 1.63824100  |
| C | 3.48681800  | -2.10365900 | 1.62103900  |
| H | 3.35035000  | -0.11709300 | 2.41591600  |
| C | 5.91279500  | -0.99195600 | 2.91369400  |
| H | 5.84200600  | -0.76948800 | 0.76222600  |
| H | 5.54685400  | 0.72400300  | 1.64853900  |
| C | 4.07943000  | -2.73649300 | 2.89236800  |
| H | 3.89813800  | -2.61722400 | 0.74244200  |
| H | 2.40075700  | -2.25251000 | 1.59596400  |
| C | 5.59106300  | -2.48963600 | 2.99615300  |
| H | 6.99600600  | -0.82921800 | 2.94325500  |
| H | 5.49709200  | -0.48107500 | 3.79345000  |
| H | 3.86372900  | -3.81095500 | 2.90125500  |
| H | 3.57893800  | -2.30978300 | 3.77288800  |
| H | 5.98038700  | -2.90970000 | 3.93010800  |
| H | 6.10300300  | -3.01780300 | 2.17948400  |
| C | 3.45140700  | 2.07985800  | 0.06800000  |
| C | 2.33839900  | 2.99469700  | -0.48414000 |
| C | 4.77466000  | 2.33744400  | -0.67885200 |
| H | 3.59525600  | 2.32142000  | 1.13069100  |
| C | 2.74321300  | 4.47755100  | -0.41729100 |

|           |             |             |             |
|-----------|-------------|-------------|-------------|
| H         | 2.12941900  | 2.72204500  | -1.52891100 |
| H         | 1.40835700  | 2.83248400  | 0.07183300  |
| C         | 5.17860000  | 3.82091300  | -0.59370300 |
| H         | 4.65317000  | 2.06584000  | -1.73544500 |
| H         | 5.57997400  | 1.71368000  | -0.28184000 |
| C         | 4.07487200  | 4.73942500  | -1.13296300 |
| H         | 1.94682400  | 5.09400300  | -0.84987900 |
| H         | 2.83144700  | 4.77651200  | 0.63667800  |
| H         | 6.11184100  | 3.97584000  | -1.14671100 |
| H         | 5.39055300  | 4.07774500  | 0.45353100  |
| H         | 4.36583600  | 5.78973900  | -1.02153200 |
| H         | 3.94990900  | 4.56238700  | -2.21046300 |
| C         | 3.25777500  | -0.51262000 | -1.60583400 |
| C         | 2.26051000  | -1.63492300 | -1.96126400 |
| C         | 4.70765600  | -0.98425300 | -1.83254700 |
| C         | 3.06227900  | 0.33111800  | -2.28355800 |
| C         | 2.46504500  | -2.11821400 | -3.40736600 |
| H         | 2.39930800  | -2.47924000 | -1.27296700 |
| H         | 1.23165300  | -1.28528200 | -1.82287000 |
| C         | 4.90515400  | -1.46033100 | -3.28413500 |
| H         | 4.92973900  | -1.81667900 | -1.15380000 |
| H         | 5.42383300  | -0.18998100 | -1.60640700 |
| C         | 3.91084200  | -2.56655700 | -3.66063800 |
| H         | 1.76577500  | -2.93429200 | -3.62223500 |
| H         | 2.21175300  | -1.30045600 | -4.09692900 |
| H         | 5.93578600  | -1.80858900 | -3.41588300 |
| H         | 4.77595500  | -0.60588400 | -3.96314600 |
| H         | 4.04191600  | -2.85306800 | -4.71001500 |
| H         | 4.12340900  | -3.46424800 | -3.06316600 |
| Au        | 0.48431700  | 0.12757800  | 0.65530600  |
| <b>25</b> |             |             |             |
| C         | -2.56898200 | 0.20382700  | 0.05692800  |
| C         | -1.55813400 | 0.05012700  | 1.20880300  |
| C         | -1.93585700 | 1.13984600  | 2.13809500  |
| H         | -1.73502600 | 2.15434800  | 1.79714100  |
| H         | -1.69306300 | 1.01911900  | 3.19363800  |
| O         | -3.52385600 | 1.12623400  | 2.09510100  |
| H         | -3.89513600 | 0.40765200  | 2.72828800  |
| C         | -2.59254000 | -0.92660200 | -0.95592900 |
| C         | -2.51504500 | -2.27416600 | -0.57371900 |
| C         | -2.64060300 | -0.62445900 | -2.32453500 |
| C         | -2.49575000 | -3.28823900 | -1.53189900 |
| H         | -2.45626300 | -2.54366800 | 0.47676200  |
| C         | -2.62556300 | -1.63734200 | -3.28571300 |
| H         | -2.68543300 | 0.41418600  | -2.64115000 |
| C         | -2.55483200 | -2.97373800 | -2.89171400 |
| H         | -2.42655500 | -4.32508000 | -1.21569500 |

|   |             |             |             |
|---|-------------|-------------|-------------|
| H | -2.66299900 | -1.37967400 | -4.33988700 |
| H | -2.53881100 | -3.76379400 | -3.63624500 |
| H | -2.34840000 | 1.12731500  | -0.48807300 |
| H | -1.70318700 | -0.91293000 | 1.71260800  |
| C | -3.95678300 | 0.54414300  | 0.78654700  |
| C | -4.82582200 | 1.55741400  | 0.05542600  |
| C | -5.04747600 | 2.83757700  | 0.58008100  |
| C | -5.38947900 | 1.21566700  | -1.18413500 |
| C | -5.81630100 | 3.76310800  | -0.12810700 |
| H | -4.63015500 | 3.11453100  | 1.54074700  |
| C | -6.15763300 | 2.14573800  | -1.88339100 |
| H | -5.23407600 | 0.22812000  | -1.60080700 |
| C | -6.37322700 | 3.42183300  | -1.35981300 |
| H | -5.98140600 | 4.75069200  | 0.29140300  |
| H | -6.58982300 | 1.86854700  | -2.83999400 |
| H | -6.97327000 | 4.14241600  | -1.90665300 |
| C | -4.75922400 | -0.67077000 | 1.30271700  |
| O | -4.73297500 | -0.90561200 | 2.51367300  |
| O | -5.44068400 | -1.32947800 | 0.40872100  |
| C | -6.34179100 | -2.40303700 | 0.87167000  |
| H | -7.09824800 | -2.43914500 | 0.08749400  |
| H | -6.79457500 | -2.07256600 | 1.80809600  |
| C | -5.60861100 | -3.72131200 | 1.02208500  |
| H | -5.11368500 | -4.00354600 | 0.08998800  |
| H | -6.33541700 | -4.49938100 | 1.27570900  |
| H | -4.86989200 | -3.67475800 | 1.82586500  |
| P | 2.86199400  | 0.25608100  | 0.11129900  |
| C | 3.81078500  | -0.60073400 | 1.54399100  |
| C | 5.33015600  | -0.36450300 | 1.62557000  |
| C | 3.46509600  | -2.10052700 | 1.62672200  |
| H | 3.35311300  | -0.10912800 | 2.41453800  |
| C | 5.90958900  | -1.00713900 | 2.90030400  |
| H | 5.82794800  | -0.79297700 | 0.74823500  |
| H | 5.55292100  | 0.70715200  | 1.63006700  |
| C | 4.05941100  | -2.73402000 | 2.89702500  |
| H | 3.86609100  | -2.62129000 | 0.74768700  |
| H | 2.37750600  | -2.23935600 | 1.60891500  |
| C | 5.57397100  | -2.50123300 | 2.99065900  |
| H | 6.99439900  | -0.85458500 | 2.92266800  |
| H | 5.50402600  | -0.48868300 | 3.78034200  |
| H | 3.83335000  | -3.80622100 | 2.91112400  |
| H | 3.56825300  | -2.29934900 | 3.77888300  |
| H | 5.96463100  | -2.92119600 | 3.92403400  |
| H | 6.07601700  | -3.03770000 | 2.17330300  |
| C | 3.46204000  | 2.07869600  | 0.05493800  |
| C | 2.35494000  | 3.00159500  | -0.49550200 |
| C | 4.78315500  | 2.31738000  | -0.70213900 |
| H | 3.61523200  | 2.32398400  | 1.11543100  |

|                     |             |             |             |
|---------------------|-------------|-------------|-------------|
| C                   | 2.77600100  | 4.48045900  | -0.44047800 |
| H                   | 2.13605700  | 2.72497400  | -1.53713000 |
| H                   | 1.42698000  | 2.85285000  | 0.06791900  |
| C                   | 5.20309700  | 3.79707400  | -0.62915900 |
| H                   | 4.65187500  | 2.04007600  | -1.75606300 |
| H                   | 5.58440400  | 1.68789200  | -0.30598000 |
| C                   | 4.10540700  | 4.72360700  | -1.16689400 |
| H                   | 1.98322900  | 5.10255800  | -0.87151900 |
| H                   | 2.87467900  | 4.78484900  | 0.61099800  |
| H                   | 6.13400700  | 3.93831100  | -1.18956800 |
| H                   | 5.42504700  | 4.05830400  | 0.41488400  |
| H                   | 4.40794300  | 5.77145200  | -1.06399000 |
| H                   | 3.97128400  | 4.54124800  | -2.24236900 |
| C                   | 3.22701500  | -0.52115300 | -1.60631800 |
| C                   | 2.21155600  | -1.63119200 | -1.94822500 |
| C                   | 4.66892800  | -1.01336800 | -1.84020700 |
| H                   | 3.03816100  | 0.32234300  | -2.28611000 |
| C                   | 2.39983700  | -2.12626500 | -3.39252400 |
| H                   | 2.34256300  | -2.47287100 | -1.25525900 |
| H                   | 1.18843400  | -1.26595000 | -1.80668500 |
| C                   | 4.84936400  | -1.50158200 | -3.28997100 |
| H                   | 4.88530800  | -1.84392400 | -1.15743600 |
| H                   | 5.39680400  | -0.22683100 | -1.62470200 |
| C                   | 3.83747600  | -2.59658000 | -3.65220800 |
| H                   | 1.68728100  | -2.93331900 | -3.59714100 |
| H                   | 2.15349200  | -1.30932400 | -4.08553000 |
| H                   | 5.87422400  | -1.86465800 | -3.42624000 |
| H                   | 4.72718400  | -0.64997100 | -3.97376000 |
| H                   | 3.95746100  | -2.89177000 | -4.70044200 |
| H                   | 4.04157000  | -3.49313300 | -3.05015400 |
| Au                  | 0.48619100  | 0.15598300  | 0.66884200  |
| TS <sub>25-26</sub> |             |             |             |
| C                   | -2.56522500 | 0.33689000  | 0.06935500  |
| C                   | -1.58143900 | 0.31042400  | 1.24142900  |
| C                   | -1.79374600 | 1.52589300  | 1.97286500  |
| H                   | -1.67402300 | 2.47695300  | 1.46296900  |
| H                   | -1.61145900 | 1.56989100  | 3.04518300  |
| O                   | -3.62396500 | 1.59053200  | 1.87124500  |
| H                   | -3.97746200 | 1.07952800  | 2.65773500  |
| C                   | -2.53906200 | -0.86354500 | -0.85769100 |
| C                   | -2.34693800 | -2.17002300 | -0.38301700 |
| C                   | -2.65665000 | -0.66915700 | -2.24142100 |
| C                   | -2.28376300 | -3.24911300 | -1.26485300 |
| H                   | -2.23720900 | -2.35578600 | 0.68113900  |
| C                   | -2.59895300 | -1.74800700 | -3.12655200 |
| H                   | -2.79553500 | 0.33573800  | -2.63041600 |
| C                   | -2.41361700 | -3.04253400 | -2.64043600 |

|   |             |             |             |
|---|-------------|-------------|-------------|
| H | -2.12868400 | -4.25199600 | -0.87744200 |
| H | -2.69484900 | -1.57364200 | -4.19404900 |
| H | -2.36543200 | -3.88311200 | -3.32598900 |
| H | -2.35942200 | 1.22460200  | -0.53851700 |
| H | -1.71177400 | -0.56958700 | 1.87834000  |
| C | -3.98063400 | 0.71237900  | 0.75695500  |
| C | -4.92149400 | 1.46081800  | -0.18684500 |
| C | -5.14942700 | 2.83364000  | -0.01608200 |
| C | -5.53563800 | 0.79620200  | -1.26005400 |
| C | -5.97362500 | 3.52789200  | -0.90293500 |
| H | -4.69425000 | 3.35951400  | 0.81425200  |
| C | -6.35909900 | 1.49727300  | -2.14142000 |
| H | -5.37892600 | -0.26438900 | -1.40752900 |
| C | -6.58140900 | 2.86387000  | -1.96801000 |
| H | -6.14340500 | 4.58972300  | -0.75276800 |
| H | -6.83001400 | 0.96818900  | -2.96440500 |
| H | -7.22578700 | 3.40476000  | -2.65410800 |
| C | -4.66791600 | -0.46146600 | 1.49426500  |
| O | -4.69164400 | -0.45033700 | 2.72236100  |
| O | -5.20908300 | -1.37951500 | 0.73027100  |
| C | -5.99251600 | -2.44024500 | 1.38400600  |
| H | -6.70355000 | -2.73503900 | 0.61155800  |
| H | -6.52480500 | -1.99216600 | 2.22470800  |
| C | -5.11105200 | -3.59572700 | 1.81828700  |
| H | -4.55304600 | -4.00237800 | 0.97135000  |
| H | -5.74355400 | -4.39052000 | 2.22594100  |
| H | -4.41242200 | -3.28661100 | 2.59974400  |
| P | 2.85640500  | 0.22255300  | 0.12742900  |
| C | 3.66282600  | -1.05890700 | 1.30756400  |
| C | 5.20134900  | -1.08566200 | 1.36145000  |
| C | 3.07707800  | -2.46738500 | 1.09018900  |
| H | 3.30278700  | -0.69691400 | 2.28134500  |
| C | 5.68776600  | -2.07123400 | 2.44122400  |
| H | 5.60753300  | -1.38733100 | 0.38954900  |
| H | 5.59606100  | -0.08837900 | 1.58018600  |
| C | 3.58015400  | -3.44523200 | 2.16669600  |
| H | 3.37245300  | -2.84052900 | 0.10122300  |
| H | 1.98123900  | -2.42674200 | 1.10000400  |
| C | 5.11348000  | -3.47806500 | 2.23040300  |
| H | 6.78302700  | -2.09828700 | 2.43966800  |
| H | 5.38673300  | -1.69879400 | 3.43026100  |
| H | 3.18195200  | -4.44615000 | 1.96574400  |
| H | 3.18098900  | -3.13993000 | 3.14403700  |
| H | 5.44434800  | -4.14592900 | 3.03315700  |
| H | 5.50838100  | -3.89668100 | 1.29409900  |
| C | 3.73848200  | 1.89907200  | 0.44279500  |
| C | 2.78532400  | 3.08311400  | 0.18260000  |
| C | 5.05957500  | 2.09422500  | -0.32608400 |

|           |             |             |             |
|-----------|-------------|-------------|-------------|
| H         | 3.95856500  | 1.86497300  | 1.51909700  |
| C         | 3.44854000  | 4.42502700  | 0.54009800  |
| H         | 2.49766000  | 3.09152400  | -0.87866600 |
| H         | 1.86063000  | 2.95528000  | 0.75665300  |
| C         | 5.72195200  | 3.43381900  | 0.04646300  |
| H         | 4.85451400  | 2.08971600  | -1.40440100 |
| H         | 5.75504200  | 1.27373000  | -0.13057600 |
| C         | 4.77963400  | 4.61893300  | -0.19818100 |
| H         | 2.75899400  | 5.24549300  | 0.31158700  |
| H         | 3.62530700  | 4.45783600  | 1.62424000  |
| H         | 6.64682100  | 3.55258800  | -0.52874400 |
| H         | 6.01430900  | 3.40944500  | 1.10533900  |
| H         | 5.25499500  | 5.55383000  | 0.11768300  |
| H         | 4.58794100  | 4.71440300  | -1.27607900 |
| C         | 3.06735200  | -0.21405900 | -1.73214300 |
| C         | 1.87796100  | -1.04617200 | -2.25383800 |
| C         | 4.40415500  | -0.87316100 | -2.12557200 |
| H         | 3.01799000  | 0.77580000  | -2.20816100 |
| C         | 1.96904000  | -1.24567400 | -3.77637300 |
| H         | 1.87124200  | -2.02597300 | -1.75832400 |
| H         | 0.93020400  | -0.56004000 | -1.99692900 |
| C         | 4.48906800  | -1.06364900 | -3.65178800 |
| H         | 4.48255200  | -1.85426100 | -1.64093200 |
| H         | 5.25507700  | -0.27962400 | -1.78181400 |
| C         | 3.30507900  | -1.87688800 | -4.19066100 |
| H         | 1.12857400  | -1.86367100 | -4.11155700 |
| H         | 1.85774400  | -0.27097400 | -4.27228400 |
| H         | 5.43739100  | -1.55129000 | -3.90364200 |
| H         | 4.50754900  | -0.07786500 | -4.13706600 |
| H         | 3.36548700  | -1.95659000 | -5.28158800 |
| H         | 3.36046100  | -2.90243000 | -3.79920400 |
| Au        | 0.49674500  | 0.33639200  | 0.71860500  |
| <b>26</b> |             |             |             |
| C         | -2.61031300 | 0.12723000  | 0.48750600  |
| C         | -1.75681800 | -1.03903500 | 0.92991000  |
| C         | -1.18824900 | -1.14490500 | 2.17819200  |
| H         | -1.31615100 | -0.35253000 | 2.90941500  |
| H         | -0.81930700 | -2.10168100 | 2.54041500  |
| O         | -3.86892800 | 0.17350700  | 2.49111500  |
| H         | -4.50776000 | -0.40118600 | 2.95078400  |
| C         | -2.49237000 | 0.43685700  | -0.99933600 |
| C         | -2.47812900 | -0.55159500 | -1.99524800 |
| C         | -2.37395500 | 1.77868400  | -1.39249200 |
| C         | -2.36110800 | -0.20478500 | -3.34271700 |
| C         | -2.59134300 | -1.59682300 | -1.73074800 |
| C         | -2.26084400 | 2.12796000  | -2.73847000 |
| H         | -2.39318800 | 2.55955000  | -0.63690300 |

|   |             |             |             |
|---|-------------|-------------|-------------|
| C | -2.25502400 | 1.13518000  | -3.72002800 |
| H | -2.36257700 | -0.98443600 | -4.09891300 |
| H | -2.18509600 | 3.17431700  | -3.01859500 |
| H | -2.17555300 | 1.40307000  | -4.76934900 |
| H | -2.27570600 | 1.01693100  | 1.02950500  |
| H | -1.77699000 | -1.92668400 | 0.30094600  |
| C | -4.07288800 | -0.04940500 | 1.10824300  |
| C | -5.06573400 | 0.97272200  | 0.52553200  |
| C | -5.36117300 | 2.12135000  | 1.27142800  |
| C | -5.67784200 | 0.79602200  | -0.72404100 |
| C | -6.24859800 | 3.07719600  | 0.77522900  |
| H | -4.90260600 | 2.25187500  | 2.24448200  |
| C | -6.56832900 | 1.75170700  | -1.21362300 |
| H | -5.46143500 | -0.08323800 | -1.31924200 |
| C | -6.85643200 | 2.89539100  | -0.46746900 |
| H | -6.47040900 | 3.96035200  | 1.36711600  |
| H | -7.03899700 | 1.59868200  | -2.18023900 |
| H | -7.55250600 | 3.63606800  | -0.84949200 |
| C | -4.67044100 | -1.47328200 | 1.00276900  |
| O | -5.20327000 | -1.98806600 | 1.96690400  |
| O | -4.56700600 | -2.04238400 | -0.20099800 |
| C | -5.23302900 | -3.33558400 | -0.37804700 |
| H | -5.43478400 | -3.37817700 | -1.44962200 |
| H | -6.17517000 | -3.31058400 | 0.17205600  |
| C | -4.34950000 | -4.48276900 | 0.07992700  |
| H | -3.39316500 | -4.48347500 | -0.45275500 |
| H | -4.85100200 | -5.43271000 | -0.12991100 |
| H | -4.16568900 | -4.42709000 | 1.15538900  |
| P | 2.82493700  | 0.06850500  | 0.20682500  |
| C | 3.76664300  | -1.60039600 | 0.15535000  |
| C | 5.30510900  | -1.52523000 | 0.14408900  |
| C | 3.23362300  | -2.51756800 | -0.96216300 |
| H | 3.46499000  | -2.03798200 | 1.11768100  |
| C | 5.90675700  | -2.94010400 | 0.25166700  |
| H | 5.65550300  | -1.05391200 | -0.78083400 |
| H | 5.66695300  | -0.91270300 | 0.97605100  |
| C | 3.85036600  | -3.92332600 | -0.85272000 |
| H | 3.48389800  | -2.09074800 | -1.94156100 |
| H | 2.13968600  | -2.58248800 | -0.91416300 |
| C | 5.38443600  | -3.86909400 | -0.85227900 |
| H | 6.99923600  | -2.87128000 | 0.21182400  |
| H | 5.65662900  | -3.36294500 | 1.23441900  |
| H | 3.48731600  | -4.54576500 | -1.67792700 |
| H | 3.50061900  | -4.39749500 | 0.07483200  |
| H | 5.79744100  | -4.87539600 | -0.72508100 |
| H | 5.73634400  | -3.50919500 | -1.82897600 |
| C | 3.60814000  | 1.13965700  | 1.59435500  |
| C | 2.55549300  | 2.06762200  | 2.23378200  |

|           |             |             |             |
|-----------|-------------|-------------|-------------|
| C         | 4.84979000  | 1.94468500  | 1.16031200  |
| H         | 3.91389200  | 0.39547000  | 2.34277600  |
| C         | 3.14954600  | 2.86219000  | 3.41015100  |
| H         | 2.17672900  | 2.76768600  | 1.47527800  |
| H         | 1.69512100  | 1.48097100  | 2.57720500  |
| C         | 5.44030600  | 2.72623300  | 2.34953500  |
| H         | 4.56554100  | 2.65879300  | 0.37652500  |
| H         | 5.61521700  | 1.29019800  | 0.73369800  |
| C         | 4.39902400  | 3.64921400  | 2.99387200  |
| H         | 2.38628300  | 3.53547700  | 3.81542900  |
| H         | 3.41029200  | 2.16360300  | 4.21711900  |
| H         | 6.30615200  | 3.30256800  | 2.00587100  |
| H         | 5.81609900  | 2.01553600  | 3.09824700  |
| H         | 4.83024200  | 4.15964700  | 3.86150700  |
| H         | 4.11498200  | 4.43392300  | 2.27909100  |
| C         | 2.88693200  | 1.06142700  | -1.43272400 |
| C         | 1.70925800  | 0.71858900  | -2.36696800 |
| C         | 4.22722000  | 0.98445900  | -2.19159500 |
| H         | 2.74648400  | 2.09245500  | -1.07857500 |
| C         | 1.70105700  | 1.65031900  | -3.59131700 |
| H         | 1.79743500  | -0.32335800 | -2.70151100 |
| H         | 0.75577200  | 0.80201700  | -1.83369400 |
| C         | 4.21037500  | 1.92638400  | -3.40956600 |
| H         | 4.38963100  | -0.04296400 | -2.53978700 |
| H         | 5.06761800  | 1.23813500  | -1.54054500 |
| C         | 3.03600000  | 1.61831300  | -4.34775400 |
| H         | 0.87377700  | 1.36870600  | -4.25080200 |
| H         | 1.49542900  | 2.67646100  | -3.25591200 |
| H         | 5.16322200  | 1.84255000  | -3.94353000 |
| H         | 4.13895600  | 2.96561700  | -3.06012400 |
| H         | 3.01772500  | 2.33235900  | -5.17812100 |
| H         | 3.17865300  | 0.62436500  | -4.79427400 |
| Au        | 0.55075100  | -0.48491700 | 0.84069900  |
| <b>27</b> |             |             |             |
| C         | 3.22609000  | -0.46751100 | 0.99598100  |
| C         | 2.10371000  | -1.52132400 | 0.88022900  |
| C         | 1.77261300  | -2.11830800 | -0.34770500 |
| C         | 1.45799900  | -1.96874600 | 2.04087600  |
| C         | 0.81821100  | -3.13551500 | -0.40898800 |
| H         | 2.29157300  | -1.82826900 | -1.25489600 |
| C         | 0.50273700  | -2.98648200 | 1.97749800  |
| H         | 1.72531900  | -1.52612500 | 2.99296200  |
| C         | 0.18030700  | -3.57568500 | 0.75374400  |
| H         | 0.59525900  | -3.60327600 | -1.36380400 |
| H         | 0.02979100  | -3.33337000 | 2.89179200  |
| H         | -0.54201100 | -4.38562200 | 0.70832500  |
| C         | 4.58134100  | -1.18834600 | 0.75443800  |

|   |             |             |             |
|---|-------------|-------------|-------------|
| O | 5.36691400  | -1.34252900 | 1.66943100  |
| O | 4.76068300  | -1.60515900 | -0.49285400 |
| C | 6.02721800  | -2.28374600 | -0.77060400 |
| H | 6.83686000  | -1.58826700 | -0.53503000 |
| H | 6.10608500  | -3.14102200 | -0.09730300 |
| C | 3.07563500  | 0.70587500  | -0.02736000 |
| C | 1.96684800  | 1.70847300  | 0.23812300  |
| C | 1.33612600  | 2.01446500  | 1.42317000  |
| H | 1.56020000  | 1.46600400  | 2.33065100  |
| H | 0.81555900  | 2.96444300  | 1.52204700  |
| O | 3.29394100  | 0.04532900  | 2.31000700  |
| H | 4.12048600  | -0.31608500 | 2.68825100  |
| C | 4.35101000  | 1.54654300  | -0.19321300 |
| C | 4.97241100  | 1.61801100  | -1.44832700 |
| C | 4.89727800  | 2.27076900  | 0.87741800  |
| C | 6.12282400  | 2.38604600  | -1.62977400 |
| H | 4.55824300  | 1.06264700  | -2.28614000 |
| C | 6.05142700  | 3.03345600  | 0.69549900  |
| H | 4.42551400  | 2.22692200  | 1.85253100  |
| C | 6.66575700  | 3.09506500  | -0.55655600 |
| H | 6.59358600  | 2.43010900  | -2.60731100 |
| H | 6.46851300  | 3.58328700  | 1.53375900  |
| H | 7.56064100  | 3.69379100  | -0.69591500 |
| H | 2.87680200  | 0.25470400  | -1.00315800 |
| P | -2.49277600 | 0.02972200  | -0.27686800 |
| C | -3.04751700 | -1.13420200 | 1.14335700  |
| C | -4.26220300 | -2.03761800 | 0.86087000  |
| C | -3.20606300 | -0.36230300 | 2.46774300  |
| H | -2.16376800 | -1.77962300 | 1.23600000  |
| C | -4.50162500 | -2.99631600 | 2.04386500  |
| H | -5.16033700 | -1.43031600 | 0.70285800  |
| H | -4.10354500 | -2.62210800 | -0.05120000 |
| C | -3.45480500 | -1.33069100 | 3.63735900  |
| H | -4.05144500 | 0.33343800  | 2.39429700  |
| H | -2.31285300 | 0.24274400  | 2.66533800  |
| C | -4.66119400 | -2.24114300 | 3.37006000  |
| H | -5.38760100 | -3.60729100 | 1.83937200  |
| H | -3.65414800 | -3.69163700 | 2.11958800  |
| H | -3.60104500 | -0.75828900 | 4.55993000  |
| H | -2.55784700 | -1.94683700 | 3.78984600  |
| H | -4.79057700 | -2.94990400 | 4.19501500  |
| H | -5.57597100 | -1.63327900 | 3.33568900  |
| C | -2.40224900 | -1.00039000 | -1.89285300 |
| C | -1.34100300 | -0.42576200 | -2.85309200 |
| C | -3.75128100 | -1.17388000 | -2.61849600 |
| H | -2.05456500 | -1.98135200 | -1.54220900 |
| C | -1.19533800 | -1.29616200 | -4.11412100 |
| H | -1.62726500 | 0.59428700  | -3.14689700 |

|           |             |             |             |
|-----------|-------------|-------------|-------------|
| H         | -0.37482100 | -0.34870800 | -2.34119000 |
| C         | -3.59263300 | -2.06042800 | -3.86814100 |
| H         | -4.12505000 | -0.19051000 | -2.93144100 |
| H         | -4.50467300 | -1.60353800 | -1.95268400 |
| C         | -2.53753700 | -1.49879000 | -4.82894700 |
| H         | -0.46434500 | -0.83822400 | -4.78992600 |
| H         | -0.78547400 | -2.27449500 | -3.82614100 |
| H         | -4.56151900 | -2.15116400 | -4.37117100 |
| H         | -3.30623600 | -3.07494700 | -3.55838500 |
| H         | -2.41160900 | -2.16724500 | -5.68732000 |
| H         | -2.88577900 | -0.53720000 | -5.23065200 |
| C         | -3.68384200 | 1.50631700  | -0.57911800 |
| C         | -3.28978900 | 2.74415300  | 0.25240200  |
| C         | -5.18351400 | 1.18924800  | -0.40771200 |
| H         | -3.49900800 | 1.73998900  | -1.63706400 |
| C         | -4.16003200 | 3.95766000  | -0.11856700 |
| H         | -3.40734500 | 2.52100400  | 1.32092800  |
| H         | -2.23167500 | 2.98293300  | 0.09525300  |
| C         | -6.04296900 | 2.40854300  | -0.79167600 |
| H         | -5.38453400 | 0.93089800  | 0.63921100  |
| H         | -5.47672200 | 0.32601900  | -1.01082200 |
| C         | -5.65723200 | 3.65126100  | 0.02051000  |
| H         | -3.88154500 | 4.81045400  | 0.51038000  |
| H         | -3.94237400 | 4.25015900  | -1.15525100 |
| H         | -7.10078700 | 2.16482600  | -0.64422100 |
| H         | -5.91734200 | 2.61587800  | -1.86338200 |
| H         | -6.25094600 | 4.51364900  | -0.30075400 |
| H         | -5.89820600 | 3.48303500  | 1.07933600  |
| Au        | -0.29617100 | 0.87106500  | 0.31684400  |
| C         | 6.01676200  | -2.68953600 | -2.22909900 |
| H         | 5.19197900  | -3.37517600 | -2.44257600 |
| H         | 6.95437400  | -3.19864000 | -2.47054600 |
| H         | 5.92606300  | -1.81589700 | -2.88062600 |
| H         | 1.84013300  | 2.40807500  | -0.58846200 |
| <b>28</b> |             |             |             |
| C         | 2.47279400  | 0.49182900  | 0.13567900  |
| C         | 1.45766100  | 0.37548300  | 1.34225900  |
| C         | 2.04133200  | -0.69700000 | 2.25977100  |
| H         | 1.33531800  | -1.37437400 | 2.73961000  |
| H         | 2.77126500  | -0.34273300 | 2.98609400  |
| O         | 2.84163400  | -1.56609100 | 1.33969100  |
| H         | 2.14916100  | -2.15376700 | 0.82787000  |
| C         | 3.01830900  | 1.90049600  | -0.06451500 |
| C         | 3.62594000  | 2.62168600  | 0.97616200  |
| C         | 2.86040500  | 2.53162300  | -1.30523000 |
| C         | 4.08442800  | 3.92215500  | 0.76961200  |
| H         | 3.74679700  | 2.16982200  | 1.95663600  |

|   |             |             |             |
|---|-------------|-------------|-------------|
| C | 3.31392700  | 3.83616900  | -1.51384600 |
| H | 2.36550100  | 2.00369100  | -2.11711800 |
| C | 3.93241600  | 4.53387900  | -0.47737500 |
| H | 4.55392500  | 4.46184500  | 1.58680200  |
| H | 3.17869500  | 4.30501000  | -2.48392800 |
| H | 4.28560800  | 5.54832900  | -0.63482300 |
| H | 1.95667700  | 0.22128400  | -0.78590000 |
| H | 1.45998200  | 1.32202500  | 1.88918600  |
| C | 3.53653500  | -0.65444600 | 0.34782600  |
| C | 3.88963500  | -1.52096000 | -0.84988500 |
| C | 4.39128400  | -2.81500000 | -0.63328100 |
| C | 3.79466800  | -1.03741500 | -2.15943900 |
| C | 4.75122200  | -3.62175400 | -1.71097200 |
| H | 4.50444600  | -3.19318600 | 0.37876800  |
| C | 4.16732100  | -1.84474200 | -3.23535800 |
| H | 3.46158000  | -0.02404000 | -2.34781000 |
| C | 4.63714200  | -3.13958300 | -3.01634500 |
| H | 5.12930500  | -4.62308700 | -1.52929100 |
| H | 4.09308100  | -1.45550200 | -4.24608800 |
| H | 4.92290900  | -3.76563000 | -3.85590200 |
| C | 4.81782300  | -0.19945900 | 1.08937300  |
| O | 4.95247300  | -0.24206400 | 2.29420900  |
| O | 5.70841200  | 0.25275600  | 0.21696500  |
| C | 6.95552200  | 0.79728500  | 0.75232800  |
| H | 6.72931400  | 1.32492700  | 1.68083500  |
| H | 7.27103600  | 1.51252300  | -0.00845800 |
| C | 7.98113300  | -0.30260700 | 0.96256300  |
| H | 7.65409000  | -0.99939500 | 1.73823700  |
| H | 8.92847500  | 0.14256200  | 1.28249400  |
| H | 8.15828700  | -0.85479200 | 0.03569400  |
| P | -2.94158700 | -0.03560500 | 0.13608600  |
| C | -3.67394100 | 1.69290200  | 0.53919400  |
| C | -5.20794800 | 1.81551500  | 0.58604500  |
| C | -3.04396900 | 2.78611300  | -0.34608800 |
| H | -3.30000200 | 1.84104900  | 1.56268200  |
| C | -5.62149700 | 3.22380800  | 1.05521800  |
| H | -5.63283600 | 1.62819400  | -0.40643800 |
| H | -5.63314700 | 1.06878100  | 1.26438900  |
| C | -3.47425800 | 4.18779300  | 0.12118700  |
| H | -3.35975700 | 2.64238700  | -1.38744100 |
| H | -1.95039600 | 2.70437600  | -0.33094200 |
| C | -5.00219400 | 4.32150100  | 0.17981400  |
| H | -6.71446000 | 3.30051800  | 1.05260700  |
| H | -5.30167000 | 3.36407000  | 2.09709300  |
| H | -3.04717300 | 4.94303200  | -0.54801600 |
| H | -3.05206200 | 4.37877700  | 1.11756600  |
| H | -5.28089800 | 5.31024200  | 0.56010900  |
| H | -5.41322900 | 4.25159900  | -0.83703300 |

|                     |             |             |             |
|---------------------|-------------|-------------|-------------|
| C                   | -3.87917700 | -1.29113000 | 1.24687600  |
| C                   | -2.96486600 | -2.47247000 | 1.63094500  |
| C                   | -5.21874700 | -1.80697100 | 0.68535400  |
| H                   | -4.08102400 | -0.71100600 | 2.15805900  |
| C                   | -3.65997700 | -3.43210700 | 2.61283600  |
| H                   | -2.68705500 | -3.02392300 | 0.71924800  |
| H                   | -2.03647500 | -2.09110200 | 2.07259300  |
| C                   | -5.91055800 | -2.75517900 | 1.68254600  |
| H                   | -5.03570300 | -2.35218900 | -0.24996300 |
| H                   | -5.88749900 | -0.97677100 | 0.44254300  |
| C                   | -5.00434900 | -3.93090400 | 2.06753500  |
| H                   | -2.99737100 | -4.27679800 | 2.83500900  |
| H                   | -3.82493600 | -2.90744300 | 3.56397500  |
| H                   | -6.84717300 | -3.11957600 | 1.24635500  |
| H                   | -6.18541800 | -2.19270000 | 2.58540200  |
| H                   | -5.50048200 | -4.56650000 | 2.80885700  |
| H                   | -4.82950800 | -4.56046300 | 1.18368000  |
| C                   | -3.20128700 | -0.55812300 | -1.69407200 |
| C                   | -2.01069200 | -0.12944300 | -2.57738700 |
| C                   | -4.53389700 | -0.13954600 | -2.34646100 |
| H                   | -3.18468800 | -1.65568400 | -1.62612800 |
| C                   | -2.13673400 | -0.71618000 | -3.99383900 |
| H                   | -1.97645300 | 0.96612200  | -2.63951100 |
| H                   | -1.06595200 | -0.44507800 | -2.12021000 |
| C                   | -4.65759600 | -0.73562300 | -3.76119600 |
| H                   | -4.57682300 | 0.95436600  | -2.41756100 |
| H                   | -5.38644800 | -0.45274800 | -1.73894400 |
| C                   | -3.47200300 | -0.33855900 | -4.65039700 |
| H                   | -1.29658300 | -0.37321900 | -4.60845000 |
| H                   | -2.05531300 | -1.81090700 | -3.93710000 |
| H                   | -5.60156500 | -0.40932200 | -4.21156200 |
| H                   | -4.70992500 | -1.83083100 | -3.68710900 |
| H                   | -3.55862400 | -0.81410300 | -5.63342900 |
| H                   | -3.49685400 | 0.74605600  | -4.82530300 |
| Au                  | -0.55423500 | 0.09916900  | 0.75110900  |
| O                   | 0.94828400  | -2.78950000 | 0.20091000  |
| H                   | 0.24803800  | -2.09978400 | 0.21349700  |
| H                   | 0.57111300  | -3.59026700 | 0.59085000  |
| TS <sub>28-29</sub> |             |             |             |
| C                   | 2.61314000  | 0.16682500  | -0.04581500 |
| C                   | 1.50095600  | -0.33965800 | 0.94030600  |
| C                   | 2.20308700  | -1.40538200 | 1.81094700  |
| H                   | 1.58942900  | -2.26889700 | 2.08200500  |
| H                   | 2.64023800  | -0.98032100 | 2.70800400  |
| O                   | 3.26469500  | -1.90326100 | 0.96186800  |
| H                   | 2.29295100  | -2.54635600 | -0.18087400 |
| C                   | 2.80053900  | 1.67647400  | -0.01432600 |

|   |             |             |             |
|---|-------------|-------------|-------------|
| C | 3.04599400  | 2.37943900  | 1.17549500  |
| C | 2.67057900  | 2.41254500  | -1.20281500 |
| C | 3.17636100  | 3.76728200  | 1.17448000  |
| H | 3.14602100  | 1.84317900  | 2.11886800  |
| C | 2.80161000  | 3.80278300  | -1.20900400 |
| H | 2.46297900  | 1.89269800  | -2.13568700 |
| C | 3.06015000  | 4.48300700  | -0.01976800 |
| H | 3.37375900  | 4.28894700  | 2.10762500  |
| H | 2.69968300  | 4.34943400  | -2.14293200 |
| H | 3.16270800  | 5.56648200  | -0.02306900 |
| H | 2.34606500  | -0.09581500 | -1.07185000 |
| H | 1.21181600  | 0.48967300  | 1.58955600  |
| C | 3.86574100  | -0.76504300 | 0.28957600  |
| C | 4.60856600  | -1.30710700 | -0.92722000 |
| C | 5.14734300  | -2.60657300 | -0.88304900 |
| C | 4.80981600  | -0.52930600 | -2.07407400 |
| C | 5.83804800  | -3.12083200 | -1.97915000 |
| H | 5.02117700  | -3.20804700 | 0.00912900  |
| C | 5.50765600  | -1.04484800 | -3.16253300 |
| H | 4.44003800  | 0.48812200  | -2.10771000 |
| C | 6.02058200  | -2.34347900 | -3.12455700 |
| H | 6.24622200  | -4.12494300 | -1.93193400 |
| H | 5.65517600  | -0.42751800 | -4.04711400 |
| H | 6.56343800  | -2.74310300 | -3.97504900 |
| C | 4.85454900  | -0.10470200 | 1.28404100  |
| O | 4.78911000  | -0.23680300 | 2.49193400  |
| O | 5.75995600  | 0.63240000  | 0.64519200  |
| C | 6.73045400  | 1.36269500  | 1.45730300  |
| H | 6.24020900  | 1.68036400  | 2.37988500  |
| H | 6.97771500  | 2.23659200  | 0.85019200  |
| C | 7.95085900  | 0.50112900  | 1.73690900  |
| H | 7.68339400  | -0.36297400 | 2.34837000  |
| H | 8.69403700  | 1.08868100  | 2.28618100  |
| H | 8.40672300  | 0.15225900  | 0.80717500  |
| P | -3.04136600 | -0.04473400 | 0.11846500  |
| C | -3.31987800 | 1.85339100  | 0.21387400  |
| C | -4.76229900 | 2.33133900  | 0.46905300  |
| C | -2.68830900 | 2.56611000  | -1.00062700 |
| H | -2.72352000 | 2.11178600  | 1.09723500  |
| C | -4.79962000 | 3.86258200  | 0.62713600  |
| H | -5.40956400 | 2.04566700  | -0.36734500 |
| H | -5.16618200 | 1.86077500  | 1.36999500  |
| C | -2.74328400 | 4.09280400  | -0.82858100 |
| H | -3.22848400 | 2.28440900  | -1.91374600 |
| H | -1.65025700 | 2.24026200  | -1.13463700 |
| C | -4.17840600 | 4.58145800  | -0.57601400 |
| H | -5.83674500 | 4.18299000  | 0.77574600  |
| H | -4.25434000 | 4.14668600  | 1.54262100  |

|           |             |             |             |
|-----------|-------------|-------------|-------------|
| H         | -2.31854900 | 4.57716000  | -1.71155900 |
| H         | -2.10803000 | 4.38188100  | 0.02074700  |
| H         | -4.18690400 | 5.66510600  | -0.42161700 |
| H         | -4.78907600 | 4.38790700  | -1.47099400 |
| C         | -3.91886000 | -0.82447600 | 1.64190600  |
| C         | -3.18911400 | -2.10254500 | 2.09792600  |
| C         | -5.42458800 | -1.09713000 | 1.46613700  |
| H         | -3.78332300 | -0.05696400 | 2.41985200  |
| C         | -3.80745100 | -2.67376600 | 3.38532700  |
| H         | -3.24437900 | -2.85816400 | 1.30214700  |
| H         | -2.12360200 | -1.89029100 | 2.25635600  |
| C         | -6.03958900 | -1.66765400 | 2.75962100  |
| H         | -5.56854800 | -1.82464100 | 0.65547000  |
| H         | -5.96160700 | -0.18855500 | 1.17823800  |
| C         | -5.30893200 | -2.93303000 | 3.22129600  |
| H         | -3.28480100 | -3.59654200 | 3.66648700  |
| H         | -3.64775000 | -1.95828400 | 4.20478300  |
| H         | -7.10022900 | -1.87285800 | 2.58781900  |
| H         | -5.99398400 | -0.90384300 | 3.54633400  |
| H         | -5.73745900 | -3.29307600 | 4.16806400  |
| H         | -5.46745000 | -3.73316400 | 2.48612500  |
| C         | -3.76537300 | -0.83967000 | -1.46725300 |
| C         | -2.73829100 | -0.89988100 | -2.62059000 |
| C         | -5.09332900 | -0.23847900 | -1.96197800 |
| H         | -3.95359800 | -1.87295400 | -1.14143700 |
| C         | -3.29786300 | -1.69246400 | -3.81569000 |
| C         | -2.49418500 | 0.12163900  | -2.94784300 |
| H         | -1.80144300 | -1.35065100 | -2.27749700 |
| C         | -5.65315000 | -1.04725600 | -3.14281300 |
| H         | -4.91999000 | 0.79432300  | -2.29138400 |
| H         | -5.82939700 | -0.19420100 | -1.15499300 |
| C         | -4.64343000 | -1.13664900 | -4.29586000 |
| H         | -2.56689200 | -1.69181000 | -4.62840300 |
| H         | -3.42912300 | -2.74348000 | -3.51480000 |
| H         | -6.58719700 | -0.59047800 | -3.48394500 |
| H         | -5.91116700 | -2.06060700 | -2.79631200 |
| H         | -5.04668600 | -1.76126400 | -5.09998200 |
| H         | -4.49383400 | -0.13606100 | -4.72362700 |
| Au        | -0.64714900 | -0.36599500 | 0.36624700  |
| O         | 1.39783200  | -2.47968300 | -0.65351600 |
| H         | 0.93754000  | -1.49604000 | -0.05216800 |
| H         | 0.87388900  | -3.28133500 | -0.48849500 |
| <b>29</b> |             |             |             |
| C         | 3.66494000  | 1.12851000  | 0.50127900  |
| C         | 3.36835900  | 1.43314800  | 1.99020400  |
| C         | 2.61272400  | 0.19862000  | 2.49548100  |
| H         | 1.53772800  | 0.37187100  | 2.61231000  |

|   |             |             |             |
|---|-------------|-------------|-------------|
| H | 3.02310600  | -0.19234000 | 3.42789800  |
| O | 2.76218700  | -0.81637900 | 1.46361300  |
| H | 1.41720900  | -1.54925000 | 0.96821700  |
| C | 4.77667200  | 1.97770400  | -0.09333000 |
| C | 6.05552200  | 2.05089100  | 0.48111100  |
| C | 4.51042800  | 2.77653200  | -1.21447300 |
| C | 7.03967100  | 2.87166900  | -0.06924900 |
| H | 6.28836900  | 1.47930700  | 1.37411000  |
| C | 5.49196900  | 3.60117200  | -1.76646300 |
| H | 3.51563600  | 2.76733200  | -1.65497700 |
| C | 6.76424900  | 3.64652700  | -1.19770000 |
| H | 8.02217900  | 2.91290400  | 0.39161300  |
| H | 5.25880600  | 4.21091000  | -2.63428900 |
| H | 7.53129500  | 4.28728300  | -1.62163900 |
| H | 2.75089400  | 1.32771500  | -0.06996900 |
| H | 4.29659800  | 1.56452900  | 2.54775800  |
| C | 3.78987500  | -0.43571000 | 0.50753000  |
| C | 3.47602300  | -1.18326000 | -0.78274400 |
| C | 3.34847500  | -2.58420800 | -0.72284700 |
| C | 3.29211900  | -0.54741400 | -2.01295800 |
| C | 3.00654900  | -3.32065200 | -1.85725700 |
| H | 3.52686400  | -3.09935300 | 0.21747100  |
| C | 2.96135500  | -1.28708900 | -3.15398600 |
| H | 3.42986400  | 0.52265200  | -2.10143900 |
| C | 2.80600600  | -2.66997500 | -3.08005800 |
| H | 2.91994800  | -4.40150300 | -1.79263900 |
| H | 2.83308000  | -0.77514500 | -4.10301300 |
| H | 2.55212300  | -3.24158600 | -3.96745400 |
| C | 5.14995100  | -0.87564600 | 1.10625400  |
| O | 5.36528300  | -0.89515200 | 2.30070700  |
| O | 6.03676800  | -1.17267200 | 0.15449600  |
| C | 7.38140800  | -1.53766700 | 0.58481900  |
| H | 7.64043000  | -0.94026800 | 1.46147100  |
| H | 8.01333500  | -1.24824900 | -0.25652900 |
| C | 7.47363700  | -3.02533300 | 0.87895800  |
| H | 6.84364600  | -3.29250500 | 1.73114500  |
| H | 8.50783100  | -3.28551800 | 1.12556200  |
| H | 7.17082000  | -3.61533700 | 0.00938400  |
| P | -3.29111400 | 0.10388400  | 0.14328900  |
| C | -3.26921700 | 1.53284800  | 1.42065200  |
| C | -4.62489900 | 2.19665500  | 1.72732200  |
| C | -2.18710700 | 2.57774000  | 1.08750400  |
| H | -2.94975000 | 0.99671200  | 2.32534400  |
| C | -4.47063700 | 3.22366300  | 2.86585200  |
| H | -5.00902300 | 2.70235000  | 0.83455600  |
| H | -5.36647200 | 1.44597700  | 2.01792400  |
| C | -2.05013700 | 3.60205500  | 2.22790400  |
| H | -2.45464400 | 3.10429200  | 0.16248700  |

|    |             |             |             |
|----|-------------|-------------|-------------|
| H  | -1.22554200 | 2.08279300  | 0.90562900  |
| C  | -3.39348400 | 4.27014500  | 2.55140500  |
| H  | -5.43625800 | 3.70767800  | 3.04775300  |
| H  | -4.20717500 | 2.69526100  | 3.79245700  |
| H  | -1.30194600 | 4.35431800  | 1.95451500  |
| H  | -1.67046400 | 3.09253300  | 3.12456200  |
| H  | -3.27924400 | 4.95901400  | 3.39510300  |
| H  | -3.71335600 | 4.87826500  | 1.69381800  |
| C  | -4.69698100 | -1.10079500 | 0.64664400  |
| C  | -4.35308700 | -2.55356500 | 0.25965200  |
| C  | -6.09246600 | -0.71495400 | 0.11590200  |
| H  | -4.70172100 | -1.02753500 | 1.74304000  |
| C  | -5.42990400 | -3.53230600 | 0.75963200  |
| H  | -4.27079500 | -2.63011600 | -0.83407100 |
| H  | -3.37644900 | -2.83306800 | 0.67062300  |
| C  | -7.16270800 | -1.69592100 | 0.63148000  |
| H  | -6.08482000 | -0.74414500 | -0.98144700 |
| H  | -6.35883800 | 0.30524900  | 0.40621200  |
| C  | -6.82868900 | -3.14644800 | 0.26174700  |
| H  | -5.17267900 | -4.54780100 | 0.43936900  |
| H  | -5.42188600 | -3.54015900 | 1.85833200  |
| H  | -8.13879200 | -1.40915500 | 0.22528100  |
| H  | -7.23956800 | -1.60341000 | 1.72350000  |
| H  | -7.57953200 | -3.82575800 | 0.67904900  |
| H  | -6.87364200 | -3.26397900 | -0.82991000 |
| C  | -3.57674200 | 0.67378900  | -1.66669800 |
| C  | -2.25146400 | 0.98864100  | -2.38994900 |
| C  | -4.58188300 | 1.83054800  | -1.83895900 |
| H  | -4.00470900 | -0.22750600 | -2.12728200 |
| C  | -2.49914800 | 1.28793800  | -3.87896800 |
| H  | -1.77216800 | 1.85656300  | -1.91799200 |
| H  | -1.55527200 | 0.14868600  | -2.28716100 |
| C  | -4.82592600 | 2.11696500  | -3.33275200 |
| H  | -4.18118500 | 2.73484500  | -1.36492800 |
| H  | -5.53210900 | 1.60657100  | -1.34728900 |
| C  | -3.51721800 | 2.41958800  | -4.07334700 |
| H  | -1.54804800 | 1.53916800  | -4.36152100 |
| H  | -2.86720200 | 0.37685100  | -4.37086400 |
| H  | -5.52606000 | 2.95393900  | -3.42926400 |
| H  | -5.31515100 | 1.24680300  | -3.79167500 |
| H  | -3.71246600 | 2.57370900  | -5.13991800 |
| H  | -3.09388600 | 3.36011200  | -3.69415900 |
| Au | -1.21205100 | -1.01011200 | 0.34856400  |
| O  | 0.62281700  | -2.06922400 | 0.62927100  |
| H  | 2.78592100  | 2.35247800  | 2.08966500  |
| H  | 0.94804300  | -2.52342900 | -0.16491400 |

P<sub>4b</sub>



|                       |             |             |             |
|-----------------------|-------------|-------------|-------------|
| C                     | 0.61739300  | -0.40261300 | -1.46166100 |
| C                     | 0.95567800  | 0.50766900  | -2.65932600 |
| C                     | -0.41235400 | 1.05241300  | -3.09016200 |
| H                     | -0.81657200 | 0.52250400  | -3.96155400 |
| H                     | -0.37468200 | 2.12254600  | -3.31674300 |
| O                     | -1.31795000 | 0.83417800  | -1.99684100 |
| C                     | 1.77933900  | -0.74294400 | -0.54864700 |
| C                     | 2.64496000  | 0.23597200  | -0.03321600 |
| C                     | 2.02792300  | -2.08346000 | -0.21747900 |
| C                     | 3.71330000  | -0.11697700 | 0.79184500  |
| H                     | 2.48769700  | 1.28165300  | -0.27743900 |
| C                     | 3.09746100  | -2.43931100 | 0.60539600  |
| H                     | 1.37213100  | -2.85653000 | -0.60934700 |
| C                     | 3.94497700  | -1.45532500 | 1.11518400  |
| H                     | 4.37045900  | 0.65738300  | 1.17800700  |
| H                     | 3.26841900  | -3.48530200 | 0.84416600  |
| H                     | 4.78029000  | -1.72809700 | 1.75374400  |
| H                     | 0.21445800  | -1.34358500 | -1.85178300 |
| H                     | 1.61292900  | 1.32317300  | -2.35412000 |
| C                     | -0.65171800 | 0.31806900  | -0.85139900 |
| C                     | -1.59247400 | -0.64593300 | -0.12908000 |
| C                     | -2.88044600 | -0.87034400 | -0.63100300 |
| C                     | -1.18109100 | -1.35532200 | 1.00994000  |
| C                     | -3.73863100 | -1.77963500 | -0.00889500 |
| H                     | -3.20190800 | -0.32765600 | -1.51111500 |
| C                     | -2.03804700 | -2.26672800 | 1.62570600  |
| H                     | -0.19368000 | -1.19108400 | 1.42332300  |
| C                     | -3.32173800 | -2.48306700 | 1.12035700  |
| H                     | -4.73546600 | -1.93627100 | -0.41213500 |
| H                     | -1.70033800 | -2.80724000 | 2.50576500  |
| H                     | -3.98861700 | -3.19174400 | 1.60352700  |
| C                     | -0.22059600 | 1.55071400  | -0.01106900 |
| O                     | 0.23060100  | 2.55520700  | -0.52663900 |
| O                     | -0.37380000 | 1.39516600  | 1.31190300  |
| C                     | 0.02563800  | 2.50757800  | 2.15298000  |
| H                     | 0.92929600  | 2.95750300  | 1.73550500  |
| H                     | 0.25828300  | 2.04520100  | 3.11477100  |
| C                     | -1.09321700 | 3.52991700  | 2.27769700  |
| H                     | -1.30208500 | 3.99019200  | 1.30917000  |
| H                     | -0.79720400 | 4.31857400  | 2.97755800  |
| H                     | -2.00752900 | 3.06145000  | 2.65287500  |
| H                     | 1.45516300  | -0.05312100 | -3.45456600 |
| <b>P<sub>5b</sub></b> |             |             |             |
| C                     | -0.45319500 | -0.42853300 | -0.45204100 |
| C                     | -1.95851200 | -0.34446300 | -0.11812500 |
| C                     | -2.43107600 | 0.32067200  | 1.02233000  |
| C                     | -2.88865800 | -0.90808600 | -0.99921000 |

|           |             |             |             |
|-----------|-------------|-------------|-------------|
| C         | -3.79896200 | 0.40115100  | 1.28238000  |
| H         | -1.73596400 | 0.79024400  | 1.70946600  |
| C         | -4.25762700 | -0.82565400 | -0.73945200 |
| H         | -2.52537900 | -1.42223800 | -1.88100600 |
| C         | -4.71918200 | -0.17305000 | 0.40341200  |
| H         | -4.14522700 | 0.91547800  | 2.17463500  |
| H         | -4.96278100 | -1.27452800 | -1.43361100 |
| H         | -5.78422900 | -0.11014400 | 0.60773800  |
| C         | -0.00783700 | 0.96306400  | -0.96419100 |
| O         | 0.31472000  | 1.14020000  | -2.12451100 |
| O         | -0.03176800 | 1.92003100  | -0.03496800 |
| C         | 0.36378300  | 3.24752100  | -0.47410200 |
| H         | 1.40100400  | 3.19922300  | -0.81835300 |
| H         | -0.26116300 | 3.53058600  | -1.32565100 |
| C         | 0.42493500  | -0.83773900 | 0.77992200  |
| C         | 0.12388900  | -2.20682200 | 1.35949400  |
| C         | -0.56335600 | -3.21303500 | 0.81897000  |
| H         | -1.01807800 | -3.14892000 | -0.16189400 |
| H         | -0.68521900 | -4.14659000 | 1.36122700  |
| O         | -0.23368100 | -1.32508900 | -1.52218800 |
| H         | 0.07230900  | -0.77443100 | -2.26628700 |
| C         | 1.92146300  | -0.70438800 | 0.48685200  |
| C         | 2.66880100  | 0.32706400  | 1.07162800  |
| C         | 2.57821000  | -1.61158600 | -0.35819000 |
| C         | 4.03529100  | 0.45887800  | 0.81495600  |
| H         | 2.17571500  | 1.03158900  | 1.73682900  |
| C         | 3.94138300  | -1.47745700 | -0.62053900 |
| H         | 2.01116500  | -2.42120100 | -0.80314600 |
| C         | 4.67533100  | -0.44275200 | -0.03565100 |
| H         | 4.59796500  | 1.26221200  | 1.28279600  |
| H         | 4.43405200  | -2.18715400 | -1.27955800 |
| H         | 5.73833900  | -0.34433600 | -0.23708000 |
| H         | 0.20077300  | -0.10821800 | 1.56573500  |
| C         | 0.19066100  | 4.18663500  | 0.70289500  |
| H         | -0.85008000 | 4.20596400  | 1.03824400  |
| H         | 0.47643400  | 5.20120000  | 0.40867500  |
| H         | 0.82082500  | 3.88404000  | 1.54418700  |
| H         | 0.57333500  | -2.35244900 | 2.34236300  |
| <b>30</b> |             |             |             |
| C         | 2.96534000  | 0.00980200  | -0.72463700 |
| C         | 1.56217600  | 0.38251500  | -0.20094600 |
| C         | 0.69890300  | -0.65654500 | -0.25344600 |
| C         | 1.37496900  | -1.88559200 | -0.74837300 |
| H         | 0.93925600  | -2.32871300 | -1.64714100 |
| H         | 1.50546900  | -2.65323800 | 0.02168800  |
| C         | 1.31629500  | 1.71843600  | 0.40090000  |
| C         | 1.77410500  | 2.91654100  | -0.17489300 |

|    |             |             |             |   |              |             |             |
|----|-------------|-------------|-------------|---|--------------|-------------|-------------|
| C  | 0.61087000  | 1.79548300  | 1.61737900  | H | -5.96639100  | -3.03644700 | 0.52258100  |
| C  | 1.50638800  | 4.14536700  | 0.42841400  | H | -6.62233200  | -1.71511500 | -0.45872400 |
| H  | 2.33139000  | 2.89708800  | -1.10289700 | C | -3.52503300  | -3.28172500 | -0.69061100 |
| C  | 0.34498400  | 3.02475600  | 2.21923900  | H | -3.54359700  | -3.79404500 | 0.27252600  |
| H  | 0.28931700  | 0.87707000  | 2.09763600  | H | -3.85958800  | -3.99753500 | -1.45065600 |
| C  | 0.78883100  | 4.20748300  | 1.62383100  | H | -2.48962100  | -3.00976200 | -0.91660600 |
| H  | 1.86403400  | 5.05774000  | -0.03945200 | C | -3.75597200  | -2.57393900 | 2.68472300  |
| H  | -0.19297000 | 3.05680600  | 3.16243600  | H | -4.44359100  | -3.27651200 | 2.20811100  |
| H  | 0.59085800  | 5.16588200  | 2.09455200  | H | -2.73495500  | -2.81386200 | 2.37206800  |
| C  | 3.92347700  | 0.04585400  | 0.47950800  | H | -3.81945800  | -2.74069300 | 3.76643100  |
| O  | 4.52760600  | 1.03646600  | 0.81410900  | C | -5.57925300  | -0.83703900 | 2.77465700  |
| O  | 3.91460100  | -1.11399700 | 1.16948500  | H | -5.72457300  | -1.09559000 | 3.83045800  |
| C  | 4.64249200  | -1.08836600 | 2.42352100  | H | -5.82314900  | 0.22169000  | 2.66002800  |
| H  | 4.30025300  | -0.25344400 | 3.03650300  | H | -6.28651000  | -1.42463500 | 2.18634400  |
| H  | 4.42012700  | -2.03897700 | 2.90671800  | C | -3.20484700  | -0.18863700 | 3.21896700  |
| H  | 5.71288000  | -0.98881600 | 2.23489000  | H | -3.40904700  | 0.86893300  | 3.03122800  |
| C  | 3.46389400  | 0.72220800  | -1.97314100 | H | -3.38419900  | -0.37788400 | 4.28401400  |
| C  | 4.81993400  | 1.00337100  | -2.18726500 | H | -2.14704400  | -0.37999300 | 3.01399600  |
| C  | 2.53813200  | 1.00492400  | -2.98986500 | C | -6.87955600  | 0.82280500  | -0.49315400 |
| C  | 5.23740600  | 1.56858500  | -3.39438600 | C | -7.21534300  | 0.64389700  | -1.84560000 |
| H  | 5.55329000  | 0.79935900  | -1.41712400 | C | -7.81761200  | 0.44400700  | 0.47876200  |
| C  | 2.95853400  | 1.56855100  | -4.19219500 | C | -8.41853800  | 0.03987700  | -2.21306500 |
| H  | 1.48553200  | 0.79076700  | -2.83052600 | H | -6.53444300  | 0.99733900  | -2.61452100 |
| C  | 4.31106500  | 1.85363400  | -4.39725100 | C | -9.02351600  | -0.15824900 | 0.11282600  |
| H  | 6.28969300  | 1.78954800  | -3.54458100 | H | -7.61530500  | 0.63760100  | 1.52552200  |
| H  | 2.23054700  | 1.78864100  | -4.96698600 | C | -9.32263000  | -0.37361500 | -1.23321300 |
| H  | 4.63885800  | 2.29755900  | -5.33229200 | C | -8.65409400  | -0.09423300 | -3.26469800 |
| O  | 2.74175400  | -1.41338300 | -1.14631000 | H | -9.73478700  | -0.44555700 | 0.88165000  |
| Au | -1.31730200 | -0.70415500 | 0.14574800  | H | -10.26112700 | -0.84012000 | -1.51690100 |
| P  | -3.75275300 | -0.71664900 | 0.50325300  | H | 4.84841200   | -3.24830700 | -0.09203700 |
| C  | -4.35834500 | 1.07425100  | 0.22095100  | C | 7.53539100   | -1.32466600 | -0.26647200 |
| C  | -5.63449000 | 1.58443000  | -0.13602800 | C | 6.74771700   | -1.94248800 | -0.95519900 |
| C  | -3.32195500 | 2.00014900  | 0.46350300  | C | 5.80859300   | -2.70885000 | -1.75547900 |
| C  | -5.79291300 | 2.98217100  | -0.21839200 | H | 5.45372600   | -2.14814300 | -2.62547000 |
| C  | -3.50795800 | 3.37756700  | 0.38744800  | H | 6.25455700   | -3.64457000 | -2.10821000 |
| H  | -2.33109500 | 1.63543200  | 0.71367300  | O | 4.59214700   | -3.05144100 | -1.00597700 |
| C  | -4.75978400 | 3.87614800  | 0.04267000  | H | 3.54972400   | -2.09000900 | -1.02929100 |
| H  | -6.77032400 | 3.36304000  | -0.49789000 | C | 8.47519400   | -0.60636100 | 0.53561100  |
| H  | -2.67253600 | 4.04123800  | 0.58776500  | C | 9.77784000   | -1.11305100 | 0.71464700  |
| H  | -4.93420300 | 4.94529400  | -0.03111700 | C | 8.11100900   | 0.60919000  | 1.15001900  |
| C  | -4.46649300 | -2.05973800 | -0.74131000 | C | 10.69677500  | -0.41243900 | 1.49038200  |
| C  | -4.12052400 | -1.11005000 | 2.39337300  | H | 10.05658400  | -2.04824800 | 0.24009400  |
| C  | -4.36015200 | -1.43690700 | -2.14376500 | C | 9.03854800   | 1.29694000  | 1.92893300  |
| H  | -4.64425600 | -2.19123600 | -2.88695100 | H | 7.10698100   | 1.00024700  | 1.01800200  |
| H  | -5.02319200 | -0.58205400 | -2.26942000 | C | 10.32974200  | 0.79101300  | 2.09890300  |
| H  | -3.33561500 | -1.11854200 | -2.36366800 | H | 11.70015600  | -0.80533600 | 1.62174800  |
| C  | -5.89786200 | -2.52620900 | -0.44242200 | H | 8.75381500   | 2.23218800  | 2.40097900  |
| H  | -6.19268500 | -3.25149400 | -1.21044100 | H | 11.04955100  | 1.33349700  | 2.70422300  |

## 31

|    |             |             |             |   |             |             |             |
|----|-------------|-------------|-------------|---|-------------|-------------|-------------|
| C  | -4.60461300 | -0.00176100 | -0.64023600 | H | 2.37678900  | 0.51003300  | -4.37151800 |
| C  | -3.27902400 | 0.12847600  | 0.17245500  | H | 4.85756900  | 0.87596800  | -4.42022400 |
| C  | -2.24682600 | -0.22630400 | -0.64728000 | C | 2.45482900  | -1.07595900 | 1.95181500  |
| C  | -2.83850400 | -0.51198000 | -2.01409700 | C | 2.06685000  | -3.40015300 | -0.35215200 |
| H  | -2.91573500 | -1.59633300 | -2.18798400 | C | 2.67866200  | 0.44350800  | 2.02485400  |
| H  | -2.28580800 | -0.07388700 | -2.85104200 | H | 2.80666700  | 0.72916100  | 3.07576400  |
| C  | -3.25018600 | 0.56402800  | 1.58592100  | H | 3.56991800  | 0.75975500  | 1.48500600  |
| C  | -4.38101800 | 0.43975700  | 2.41692900  | H | 1.81961700  | 0.99527400  | 1.62962000  |
| C  | -2.09124000 | 1.15262500  | 2.13577500  | C | 3.65277300  | -1.84572800 | 2.52452000  |
| C  | -4.34386000 | 0.86368500  | 3.74604400  | H | 3.81832400  | -1.51027900 | 3.55544600  |
| H  | -5.29194200 | -0.00687700 | 2.03618000  | H | 3.46041700  | -2.92131700 | 2.56612700  |
| C  | -2.06048500 | 1.57944600  | 3.46099600  | H | 4.57354300  | -1.67737300 | 1.97027000  |
| H  | -1.20868400 | 1.27314300  | 1.51425600  | C | 1.20154200  | -1.41531000 | 2.78522700  |
| C  | -3.18695700 | 1.43412600  | 4.27567800  | H | 0.96670900  | -2.48056000 | 2.78691800  |
| H  | -5.22701800 | 0.74537400  | 4.36641700  | H | 1.39846900  | -1.12241300 | 3.82327100  |
| H  | -1.15588800 | 2.03069900  | 3.85874600  | H | 0.31706400  | -0.86893300 | 2.44583500  |
| H  | -3.16269500 | 1.76716300  | 5.30870400  | C | 1.22185900  | -4.16219100 | 0.68145200  |
| C  | -5.56262200 | 1.18830400  | -0.43540300 | H | 1.69438900  | -4.19621000 | 1.66606600  |
| O  | -6.62724000 | 1.17540700  | 0.11694400  | H | 0.21810300  | -3.73839600 | 0.78538100  |
| O  | -5.06057400 | 2.36766700  | -0.97296400 | H | 1.10938400  | -5.19821800 | 0.34127800  |
| C  | -5.94710500 | 3.51671400  | -0.87279200 | C | 3.49043400  | -3.96527000 | -0.40138000 |
| H  | -6.11779800 | 3.76678200  | 0.17513200  | H | 3.43665400  | -5.03926300 | -0.61629400 |
| H  | -5.44102900 | 4.32725700  | -1.39650900 | H | 4.06987400  | -3.50123200 | -1.20258600 |
| H  | -6.89693300 | 3.28445600  | -1.35404300 | H | 4.03082900  | -3.84131800 | 0.53896700  |
| C  | -5.34489900 | -1.32936300 | -0.43173200 | C | 1.41872100  | -3.55492700 | -1.74016600 |
| C  | -6.46065800 | -1.60414900 | -1.23748300 | H | 1.96873100  | -3.01453700 | -2.51515500 |
| C  | -4.89922000 | -2.30720700 | 0.46363800  | H | 1.42318700  | -4.61732700 | -2.01041300 |
| C  | -7.12357400 | -2.82373800 | -1.13753000 | H | 0.37991400  | -3.21097400 | -1.74540100 |
| H  | -6.80669400 | -0.86292900 | -1.95103400 | C | 5.55738900  | -0.67791400 | -0.16456200 |
| C  | -5.56610400 | -3.53181800 | 0.56443000  | C | 5.95022700  | 0.38570300  | 0.66469800  |
| H  | -4.03296400 | -2.12164700 | 1.08940600  | C | 6.25284900  | -1.89205600 | -0.06359600 |
| C  | -6.67879000 | -3.79206000 | -0.23258900 | C | 6.95875000  | 0.21810900  | 1.61489500  |
| H  | -7.98707000 | -3.02018000 | -1.76574000 | H | 5.47336300  | 1.35492500  | 0.55005100  |
| H  | -5.21057700 | -4.27921000 | 1.26740100  | C | 7.26409400  | -2.05990600 | 0.88498800  |
| H  | -7.19755000 | -4.74260800 | -0.15305900 | H | 6.01678500  | -2.70508700 | -0.74016200 |
| O  | -4.14581800 | 0.09175400  | -1.99495000 | C | 7.61205300  | -1.00953300 | 1.73541700  |
| Au | -0.27796000 | -0.69845400 | -0.29002800 | H | 7.24252900  | 1.05100000  | 2.25159600  |
| P  | 2.03172600  | -1.47847500 | 0.07565900  | H | 7.78812700  | -3.00897000 | 0.94840000  |
| C  | 3.15499400  | -0.65389900 | -1.23471800 | H | 8.39950300  | -1.14029200 | 2.47139000  |
| C  | 4.55646400  | -0.43140500 | -1.25753800 | H | -2.25556700 | 1.68996400  | -0.95028200 |
| C  | 2.40980700  | -0.28426100 | -2.37437400 | C | 0.54406600  | 3.90541400  | -0.37234600 |
| C  | 5.12391600  | 0.12628800  | -2.42090400 | C | -0.66131400 | 3.80206200  | -0.46938700 |
| C  | 2.99561500  | 0.25565400  | -3.51619500 | C | -2.09804200 | 3.74907600  | -0.53704600 |
| H  | 1.33393300  | -0.42834900 | -2.36521700 | H | -2.55627000 | 3.64150500  | 0.45088300  |
| C  | 4.37179800  | 0.46076300  | -3.54222500 | H | -2.52882800 | 4.60659600  | -1.06096900 |
| H  | 6.19701600  | 0.29073500  | -2.42910400 | O | -2.54575000 | 2.57453200  | -1.36335400 |
|    |             |             |             | H | -3.57472600 | 2.50149300  | -1.35096400 |
|    |             |             |             | C | 1.95936800  | 4.04489800  | -0.25564500 |

|   |            |            |             |
|---|------------|------------|-------------|
| C | 2.52829800 | 4.46115200 | 0.96441000  |
| C | 2.79378900 | 3.78157500 | -1.35918800 |
| C | 3.90727000 | 4.61927600 | 1.07012000  |
| H | 1.88343600 | 4.66770200 | 1.81235700  |
| C | 4.17250700 | 3.93254300 | -1.23813800 |
| H | 2.35568900 | 3.45690200 | -2.29676100 |
| C | 4.73087700 | 4.35618600 | -0.02859200 |
| H | 4.33997800 | 4.95243200 | 2.00830700  |
| H | 4.81121400 | 3.72434800 | -2.09036000 |
| H | 5.80549700 | 4.48729400 | 0.05574800  |

**TS<sub>31-32</sub>**

|   |             |             |             |
|---|-------------|-------------|-------------|
| C | -4.64591600 | -0.10455400 | -0.61961400 |
| C | -3.31316400 | 0.17104000  | 0.12982100  |
| C | -2.26575600 | -0.08187000 | -0.73352300 |
| C | -2.88630000 | -0.64284600 | -2.00871600 |
| H | -2.85073900 | -1.74284500 | -2.01066400 |
| H | -2.42202400 | -0.28283500 | -2.93116300 |
| C | -3.27894100 | 0.74074000  | 1.48345800  |
| C | -4.42720700 | 0.73462200  | 2.30435000  |
| C | -2.09899500 | 1.32464800  | 1.99742000  |
| C | -4.39059400 | 1.27999100  | 3.58696100  |
| H | -5.34897700 | 0.28615500  | 1.95433800  |
| C | -2.07365600 | 1.88260400  | 3.27016100  |
| H | -1.20195600 | 1.34561600  | 1.38713900  |
| C | -3.21870800 | 1.85805800  | 4.07419200  |
| H | -5.28361200 | 1.25254200  | 4.20328900  |
| H | -1.15874400 | 2.33533500  | 3.64048700  |
| H | -3.19441800 | 2.28688000  | 5.07135500  |
| C | -5.59698300 | 1.11606900  | -0.54917900 |
| O | -6.69349900 | 1.13797000  | -0.05380500 |
| O | -5.03707700 | 2.22155100  | -1.13061900 |
| C | -5.89606200 | 3.39122100  | -1.15363400 |
| H | -6.13934000 | 3.69924100  | -0.13545000 |
| H | -5.32883200 | 4.16444400  | -1.67087700 |
| H | -6.81589900 | 3.16519100  | -1.69436100 |
| C | -5.34251700 | -1.40521300 | -0.21079900 |
| C | -6.50219700 | -1.78664200 | -0.90319600 |
| C | -4.81356700 | -2.27043400 | 0.75374800  |
| C | -7.12608100 | -2.99850700 | -0.62215700 |
| H | -6.91554200 | -1.13414500 | -1.66471300 |
| C | -5.44017400 | -3.48821400 | 1.03382900  |
| H | -3.91479300 | -2.00212400 | 1.29960400  |
| C | -6.59748500 | -3.85335800 | 0.34948400  |
| H | -8.02614200 | -3.27721300 | -1.16156200 |
| H | -5.01948000 | -4.14696900 | 1.78758800  |
| H | -7.08641300 | -4.79775500 | 0.56850400  |
| O | -4.24087200 | -0.17628900 | -1.99258300 |

|    |             |             |             |
|----|-------------|-------------|-------------|
| Au | -0.27474100 | -0.57479900 | -0.35297600 |
| P  | 1.98749400  | -1.44334300 | 0.03922900  |
| C  | 3.16495800  | -0.64818600 | -1.23911700 |
| C  | 4.57478400  | -0.48576700 | -1.22718100 |
| C  | 2.46046500  | -0.23141100 | -2.38810000 |
| C  | 5.19048100  | 0.06458700  | -2.36917400 |
| C  | 3.09385100  | 0.30022500  | -3.50826000 |
| H  | 1.37952600  | -0.32765300 | -2.40514500 |
| C  | 4.47781400  | 0.44773500  | -3.50080400 |
| H  | 6.26940400  | 0.18378300  | -2.35168800 |
| H  | 2.50525300  | 0.59482000  | -4.37182700 |
| H  | 4.99960000  | 0.85707100  | -4.36058100 |
| C  | 2.38116100  | -1.07325600 | 1.92910000  |
| C  | 1.94408800  | -3.35876200 | -0.40934800 |
| C  | 2.66080200  | 0.43575400  | 2.02214800  |
| H  | 2.79524500  | 0.70261100  | 3.07707100  |
| H  | 3.56411700  | 0.72843400  | 1.48931200  |
| H  | 1.82474200  | 1.02424400  | 1.63147000  |
| C  | 3.53690000  | -1.89653700 | 2.51431700  |
| H  | 3.69835700  | -1.57656900 | 3.55068300  |
| H  | 3.30040600  | -2.96376900 | 2.54265600  |
| H  | 4.47251100  | -1.76049900 | 1.97656700  |
| C  | 1.10006100  | -1.37314900 | 2.73456100  |
| H  | 0.82513100  | -2.42867500 | 2.72173900  |
| H  | 1.28766600  | -1.09624900 | 3.77864400  |
| H  | 0.24367800  | -0.79025000 | 2.38318800  |
| C  | 1.04296800  | -4.09081800 | 0.59784000  |
| H  | 1.49401000  | -4.15793600 | 1.59077600  |
| H  | 0.05894400  | -3.61985300 | 0.68728600  |
| H  | 0.88768900  | -5.11627700 | 0.24312500  |
| C  | 3.34230500  | -3.98682500 | -0.43262300 |
| H  | 3.24388200  | -5.05618000 | -0.65447900 |
| H  | 3.95838500  | -3.54634600 | -1.21959700 |
| H  | 3.86897000  | -3.89200300 | 0.51884500  |
| C  | 1.32244500  | -3.47022800 | -1.81333300 |
| H  | 1.91310600  | -2.94577400 | -2.56901100 |
| H  | 1.28758600  | -4.52888300 | -2.09560200 |
| H  | 0.29974100  | -3.08162000 | -1.83869200 |
| C  | 5.53949000  | -0.79192200 | -0.11662800 |
| C  | 5.95534700  | 0.23959400  | 0.74153300  |
| C  | 6.18397400  | -2.03460300 | -0.02480500 |
| C  | 6.93462300  | 0.01367300  | 1.71006100  |
| H  | 5.52074200  | 1.22941000  | 0.63597400  |
| C  | 7.16548200  | -2.26088400 | 0.94266700  |
| H  | 5.93274100  | -2.82408700 | -0.72355300 |
| C  | 7.53539400  | -1.24143300 | 1.82105400  |
| H  | 7.23686800  | 0.82268300  | 2.36860900  |
| H  | 7.65018300  | -3.23107900 | 0.99855200  |

|           |             |             |             |
|-----------|-------------|-------------|-------------|
| H         | 8.30015100  | -1.41750100 | 2.57135700  |
| H         | -2.09594900 | 1.27656900  | -1.09305400 |
| C         | 0.67090800  | 3.76241300  | -0.48554800 |
| C         | -0.50913500 | 3.62994000  | -0.73459400 |
| C         | -1.93189200 | 3.58457100  | -0.99419700 |
| H         | -2.50602700 | 3.63421500  | -0.06250200 |
| H         | -2.24219800 | 4.40565100  | -1.65001600 |
| O         | -2.30291700 | 2.34624300  | -1.70348800 |
| H         | -3.29036500 | 2.31075200  | -1.76657000 |
| C         | 2.05763900  | 3.93870900  | -0.19156200 |
| C         | 2.45352400  | 4.47823000  | 1.04854100  |
| C         | 3.03839100  | 3.59412500  | -1.14124900 |
| C         | 3.80380100  | 4.67321600  | 1.32584100  |
| H         | 1.69733100  | 4.75044400  | 1.77785300  |
| C         | 4.38686400  | 3.78775800  | -0.85103700 |
| H         | 2.73584800  | 3.17621100  | -2.09523700 |
| C         | 4.77257300  | 4.32988100  | 0.37836500  |
| H         | 4.10115500  | 5.09899000  | 2.27922500  |
| H         | 5.13661000  | 3.52131300  | -1.58929700 |
| H         | 5.82431300  | 4.49202800  | 0.59457600  |
| <b>32</b> |             |             |             |
| C         | -3.99177600 | -0.56258900 | -0.39709600 |
| C         | -3.01092900 | 0.61290800  | -0.16930400 |
| C         | -2.38864400 | 0.87344100  | -1.38280700 |
| C         | -3.01118500 | 0.01539400  | -2.45547500 |
| H         | -2.30666600 | -0.46229000 | -3.14183400 |
| H         | -3.71380300 | 0.62449200  | -3.04418800 |
| C         | -3.02600500 | 1.51084300  | 1.00527800  |
| C         | -3.96444200 | 1.34266600  | 2.04161400  |
| C         | -2.13469900 | 2.60384600  | 1.07751000  |
| C         | -4.01491500 | 2.24208000  | 3.10722300  |
| H         | -4.66880200 | 0.51969500  | 2.02129000  |
| C         | -2.18638300 | 3.49119700  | 2.14581700  |
| H         | -1.39604100 | 2.76518700  | 0.29858000  |
| C         | -3.12757500 | 3.31550300  | 3.16637700  |
| H         | -4.75255500 | 2.09823900  | 3.89038000  |
| H         | -1.49528600 | 4.32803400  | 2.17809300  |
| H         | -3.16741800 | 4.01228200  | 3.99804000  |
| C         | -5.45379400 | 0.00352500  | -0.40364400 |
| O         | -6.35028500 | -0.38882500 | 0.30360600  |
| O         | -5.58077000 | 0.97535800  | -1.32333800 |
| C         | -6.90597600 | 1.54072800  | -1.44891000 |
| H         | -7.22040100 | 1.97828300  | -0.49934900 |
| H         | -6.82470300 | 2.30512500  | -2.22013400 |
| H         | -7.61856100 | 0.76788500  | -1.74342400 |
| C         | -3.90585900 | -1.78818600 | 0.50633400  |
| C         | -4.60088900 | -2.94008900 | 0.10589800  |

|    |             |             |             |
|----|-------------|-------------|-------------|
| C  | -3.15697900 | -1.82817600 | 1.68652400  |
| C  | -4.54357900 | -4.10356500 | 0.86803400  |
| H  | -5.18498200 | -2.92310800 | -0.80754200 |
| C  | -3.10733200 | -2.99532200 | 2.45675800  |
| H  | -2.62219400 | -0.95092700 | 2.02937400  |
| C  | -3.79765600 | -4.13498200 | 2.04998100  |
| H  | -5.08950600 | -4.98443700 | 0.54435200  |
| H  | -2.53348400 | -3.00397000 | 3.37891900  |
| H  | -3.76345900 | -5.03902600 | 2.65045900  |
| O  | -3.69673000 | -1.00736300 | -1.73513800 |
| Au | -0.71999200 | -0.33698900 | -0.42056800 |
| P  | 1.41073800  | -1.48333700 | -0.12095900 |
| C  | 2.61720500  | -0.73427800 | -1.39624100 |
| C  | 4.03702100  | -0.73434900 | -1.41870200 |
| C  | 1.93719500  | -0.15492300 | -2.48710200 |
| C  | 4.68138400  | -0.16557700 | -2.53512600 |
| C  | 2.59889000  | 0.39208200  | -3.58221900 |
| H  | 0.85263000  | -0.12536900 | -2.47841700 |
| C  | 3.98953100  | 0.38529200  | -3.60840800 |
| H  | 5.76680200  | -0.16682700 | -2.54362800 |
| H  | 2.02611900  | 0.82438600  | -4.39659700 |
| H  | 4.53338500  | 0.80692400  | -4.44810600 |
| C  | 1.89281300  | -1.23957300 | 1.76963700  |
| C  | 1.11120900  | -3.35233000 | -0.66438700 |
| C  | 2.37350200  | 0.21271300  | 1.91251500  |
| H  | 2.55943700  | 0.41512300  | 2.97349400  |
| H  | 3.29925600  | 0.40222200  | 1.37313700  |
| H  | 1.61897100  | 0.92629700  | 1.56705700  |
| C  | 2.94437200  | -2.24027600 | 2.27009300  |
| H  | 3.18460300  | -1.99324100 | 3.31077800  |
| H  | 2.56463600  | -3.26560100 | 2.26254700  |
| H  | 3.86967300  | -2.20628600 | 1.69942800  |
| C  | 0.60540900  | -1.40217500 | 2.60074700  |
| H  | 0.15696500  | -2.39284100 | 2.51520700  |
| H  | 0.86465000  | -1.24456200 | 3.65411700  |
| H  | -0.14792800 | -0.65639800 | 2.33048400  |
| C  | 0.21812600  | -4.04695700 | 0.37466800  |
| H  | 0.72891500  | -4.19403000 | 1.32943200  |
| H  | -0.71744200 | -3.50939400 | 0.55325000  |
| H  | -0.04367500 | -5.04007400 | -0.00802100 |
| C  | 2.43367300  | -4.10901100 | -0.82953300 |
| H  | 2.20969500  | -5.14620800 | -1.10476900 |
| H  | 3.03624000  | -3.67954900 | -1.63303200 |
| H  | 3.02910400  | -4.12874700 | 0.08516600  |
| C  | 0.38169800  | -3.30836400 | -2.01884900 |
| H  | 0.96718000  | -2.79541600 | -2.78697300 |
| H  | 0.22010400  | -4.33767200 | -2.35907500 |
| H  | -0.59781700 | -2.82624400 | -1.94102600 |

|                           |             |             |             |
|---------------------------|-------------|-------------|-------------|
| C                         | 4.99182500  | -1.23628400 | -0.37235600 |
| C                         | 5.56893900  | -0.32628700 | 0.52915300  |
| C                         | 5.47280300  | -2.55424500 | -0.38753300 |
| C                         | 6.54416000  | -0.74066300 | 1.43749500  |
| H                         | 5.26305200  | 0.71569600  | 0.50665800  |
| C                         | 6.45015100  | -2.96892700 | 0.51999300  |
| H                         | 5.09873700  | -3.25555000 | -1.12416800 |
| C                         | 6.97979600  | -2.06682800 | 1.44373800  |
| H                         | 6.97245300  | -0.02311200 | 2.13112300  |
| H                         | 6.80741100  | -3.99407600 | 0.49274500  |
| H                         | 7.74108600  | -2.38916000 | 2.14750500  |
| H                         | -1.89625000 | 1.81161800  | -1.63198200 |
| C                         | 1.38452800  | 4.32523800  | -0.48073000 |
| C                         | 0.46688400  | 4.51099800  | -1.25269100 |
| C                         | -0.59966500 | 4.82469700  | -2.19582600 |
| H                         | -1.33429400 | 5.48544700  | -1.71109500 |
| H                         | -0.17313400 | 5.37826600  | -3.04534100 |
| O                         | -1.23117100 | 3.61905800  | -2.65476600 |
| H                         | -1.87657100 | 3.87548900  | -3.32774500 |
| C                         | 2.49846000  | 4.13753200  | 0.39663200  |
| C                         | 2.33886500  | 4.21551900  | 1.79394200  |
| C                         | 3.78252600  | 3.90107900  | -0.13291600 |
| C                         | 3.43732600  | 4.06431200  | 2.63732500  |
| H                         | 1.35306900  | 4.40574100  | 2.20631500  |
| C                         | 4.87666800  | 3.75465600  | 0.71730200  |
| H                         | 3.90912800  | 3.84540300  | -1.20912000 |
| C                         | 4.70798900  | 3.83596000  | 2.10280000  |
| H                         | 3.30424700  | 4.13558200  | 3.71264900  |
| H                         | 5.86508900  | 3.59137400  | 0.29771200  |
| H                         | 5.56430400  | 3.73219400  | 2.76244100  |
| <b>TS<sub>4a-33</sub></b> |             |             |             |
| C                         | -4.37832900 | -0.49863100 | -0.77901400 |
| C                         | -3.15286600 | 0.34292200  | -0.31584500 |
| C                         | -1.97965900 | -0.27877800 | -0.74357600 |
| C                         | -2.40099000 | -1.39177600 | -1.67348600 |
| H                         | -2.49025400 | -2.36010400 | -1.17172600 |
| H                         | -1.81094200 | -1.48413700 | -2.58476900 |
| C                         | -3.28725200 | 1.52387900  | 0.56211000  |
| C                         | -4.35810500 | 1.61848000  | 1.46856800  |
| C                         | -2.35859100 | 2.57845500  | 0.49597700  |
| C                         | -4.47497200 | 2.72570700  | 2.30944200  |
| H                         | -5.09681000 | 0.82649500  | 1.53085700  |
| C                         | -2.48795800 | 3.68687600  | 1.32857000  |
| H                         | -1.55124700 | 2.53647900  | -0.22789500 |
| C                         | -3.54214600 | 3.76080100  | 2.24362200  |
| H                         | -5.30136800 | 2.77855000  | 3.01115400  |
| H                         | -1.77290700 | 4.50078300  | 1.25579500  |

|    |             |             |             |
|----|-------------|-------------|-------------|
| H  | -3.64147700 | 4.62618900  | 2.89148300  |
| C  | -5.57892600 | 0.38633600  | -1.19191000 |
| O  | -6.67852700 | 0.29781200  | -0.70428600 |
| O  | -5.20872600 | 1.27170700  | -2.12398700 |
| C  | -6.23731900 | 2.19184500  | -2.56443300 |
| H  | -6.57561000 | 2.79905700  | -1.72282800 |
| H  | -5.76563700 | 2.80907800  | -3.32666300 |
| H  | -7.08104200 | 1.63688400  | -2.97794600 |
| C  | -4.76665300 | -1.69714200 | 0.05125200  |
| C  | -5.72331500 | -2.59303300 | -0.45335800 |
| C  | -4.17958800 | -1.94868300 | 1.29826900  |
| C  | -6.07689100 | -3.72372400 | 0.27708600  |
| H  | -6.18998300 | -2.40460700 | -1.41446000 |
| C  | -4.54487200 | -3.07926000 | 2.03252200  |
| H  | -3.44942300 | -1.25846200 | 1.70928900  |
| C  | -5.48999400 | -3.96814500 | 1.52221200  |
| H  | -6.81584600 | -4.41141900 | -0.12168200 |
| H  | -4.09106200 | -3.26014500 | 3.00184700  |
| H  | -5.77416000 | -4.84688900 | 2.09288800  |
| O  | -3.73314200 | -0.91485400 | -2.07419900 |
| H  | -3.17527600 | 0.29840700  | -1.82413700 |
| Au | -0.01458600 | 0.06996300  | -0.29259400 |
| P  | 2.36417300  | 0.38259600  | 0.24367600  |
| C  | 3.17438100  | -1.34677500 | 0.23156100  |
| C  | 4.52771000  | -1.73327200 | 0.04609800  |
| C  | 2.22877400  | -2.35771700 | 0.50398300  |
| C  | 4.84771300  | -3.10144400 | 0.15251200  |
| C  | 2.57394200  | -3.70140600 | 0.61638200  |
| H  | 1.18608100  | -2.08372200 | 0.63030600  |
| C  | 3.90094800  | -4.07900200 | 0.43871400  |
| H  | 5.88368600  | -3.38954400 | 0.00419100  |
| H  | 1.80776000  | -4.43944600 | 0.83294600  |
| H  | 4.19945300  | -5.11999800 | 0.51458400  |
| C  | 3.03060500  | 1.64730600  | -1.10624500 |
| C  | 2.49050300  | 1.02540800  | 2.09756700  |
| C  | 3.12467500  | 0.85888000  | -2.42335200 |
| H  | 3.40741100  | 1.54973200  | -3.22606300 |
| H  | 3.87598700  | 0.07169900  | -2.38347700 |
| H  | 2.16278200  | 0.41072400  | -2.69431900 |
| C  | 4.36719200  | 2.31490800  | -0.75391500 |
| H  | 4.65456500  | 2.97013600  | -1.58475600 |
| H  | 4.28419700  | 2.94471300  | 0.13615200  |
| H  | 5.17341700  | 1.60109000  | -0.60158700 |
| C  | 1.95874600  | 2.74345300  | -1.28061400 |
| H  | 1.82231300  | 3.35270300  | -0.38578000 |
| H  | 2.28612000  | 3.41090200  | -2.08609000 |
| H  | 0.98871600  | 2.32627500  | -1.56908200 |
| C  | 1.93590400  | 2.45618400  | 2.17874400  |

|           |             |             |             |
|-----------|-------------|-------------|-------------|
| H         | 2.57953500  | 3.18405900  | 1.67877900  |
| H         | 0.92597000  | 2.53126900  | 1.76350200  |
| H         | 1.87939100  | 2.74599800  | 3.23441000  |
| C         | 3.92578500  | 0.97493200  | 2.63131100  |
| H         | 3.93482400  | 1.36290000  | 3.65671300  |
| H         | 4.29501300  | -0.05249500 | 2.66733500  |
| H         | 4.62004700  | 1.57621300  | 2.04161800  |
| C         | 1.60641000  | 0.09297900  | 2.94589800  |
| H         | 1.94519400  | -0.94568800 | 2.90541700  |
| H         | 1.65928000  | 0.41761100  | 3.99162500  |
| H         | 0.55733300  | 0.13047800  | 2.63564500  |
| C         | 5.70806200  | -0.86916400 | -0.29635000 |
| C         | 6.15107600  | -0.80119500 | -1.62782500 |
| C         | 6.50014600  | -0.27683600 | 0.69860400  |
| C         | 7.31052000  | -0.10041100 | -1.96300200 |
| H         | 5.59248900  | -1.31729900 | -2.40331800 |
| C         | 7.66261900  | 0.42190200  | 0.36510600  |
| H         | 6.22119100  | -0.37974000 | 1.74053800  |
| C         | 8.06464100  | 0.52326600  | -0.96754100 |
| H         | 7.63103000  | -0.05530100 | -2.99956500 |
| H         | 8.26113500  | 0.87362500  | 1.15065300  |
| H         | 8.96943300  | 1.06486800  | -1.22584400 |
| <b>33</b> |             |             |             |
| C         | -4.30553000 | -0.72681800 | -0.84239100 |
| C         | -5.07184800 | -0.98424100 | 0.44377400  |
| C         | -5.78436500 | 0.05048300  | 1.06811200  |
| C         | -5.08654200 | -2.26257100 | 1.01408800  |
| C         | -6.48059100 | -0.18806600 | 2.25140500  |
| H         | -5.80125100 | 1.04462300  | 0.63188600  |
| C         | -5.78152300 | -2.49766200 | 2.20216700  |
| H         | -4.58624500 | -3.08031600 | 0.50748300  |
| C         | -6.47606500 | -1.46145900 | 2.82582900  |
| H         | -7.03075000 | 0.62070600  | 2.72256600  |
| H         | -5.78986000 | -3.49542500 | 2.63046600  |
| H         | -7.02130900 | -1.64586900 | 3.74638900  |
| Au        | 0.03787700  | -0.24422300 | -0.23579300 |
| C         | -5.16948600 | -0.15907400 | -2.00067700 |
| O         | -4.72180900 | 0.62570900  | -2.81719700 |
| O         | -6.38805200 | -0.67247800 | -2.02133500 |
| C         | -7.23094400 | -0.27611000 | -3.13053400 |
| H         | -6.77233500 | -0.57863300 | -4.07377900 |
| H         | -8.17478100 | -0.79413200 | -2.97231300 |
| H         | -7.37334400 | 0.80615000  | -3.12388200 |
| P         | 2.39056900  | 0.32995200  | 0.21282900  |
| C         | 3.34471300  | -1.30676500 | 0.43011500  |
| C         | 4.72287300  | -1.60035100 | 0.25970600  |
| C         | 2.49476000  | -2.34357700 | 0.86940000  |

|   |             |             |             |
|---|-------------|-------------|-------------|
| C | 5.16024600  | -2.91069500 | 0.53797600  |
| C | 2.95585400  | -3.62577000 | 1.15227500  |
| H | 1.43527700  | -2.14194200 | 0.99278900  |
| C | 4.30620600  | -3.91426300 | 0.98221900  |
| H | 6.21408600  | -3.12990200 | 0.39850600  |
| H | 2.26097000  | -4.38717700 | 1.49270000  |
| H | 4.69370500  | -4.90738100 | 1.18710200  |
| C | 2.92092800  | 1.44421500  | -1.32118100 |
| C | 2.45210700  | 1.24579500  | 1.95173200  |
| C | 3.09214000  | 0.48416300  | -2.50965700 |
| H | 3.28443500  | 1.07555700  | -3.41221200 |
| H | 3.93113500  | -0.19611100 | -2.37362600 |
| H | 2.18698400  | -0.10657200 | -2.68713700 |
| C | 4.18661700  | 2.28034900  | -1.08774900 |
| H | 4.40093200  | 2.84153800  | -2.00494800 |
| H | 4.04932400  | 3.01401400  | -0.28854200 |
| H | 5.06082000  | 1.67438400  | -0.85971100 |
| C | 1.74405900  | 2.39198500  | -1.63264200 |
| H | 1.53616800  | 3.09888200  | -0.82832600 |
| H | 2.00829600  | 2.97439000  | -2.52266800 |
| H | 0.82207200  | 1.84643500  | -1.85797400 |
| C | 1.75815300  | 2.61153100  | 1.83017500  |
| H | 2.32630900  | 3.31564600  | 1.21755600  |
| H | 0.74433400  | 2.52897000  | 1.42611500  |
| H | 1.67746600  | 3.04761700  | 2.83250600  |
| C | 3.88791900  | 1.41614400  | 2.45963800  |
| H | 3.86254500  | 1.95971600  | 3.41148900  |
| H | 4.35656900  | 0.44774400  | 2.64902700  |
| H | 4.51718200  | 1.98098000  | 1.76979900  |
| C | 1.67033600  | 0.36418600  | 2.94230200  |
| H | 2.10879200  | -0.63203100 | 3.04415000  |
| H | 1.69739800  | 0.83989500  | 3.92946300  |
| H | 0.62021400  | 0.25597900  | 2.65246500  |
| C | 5.81803100  | -0.69238300 | -0.22264000 |
| C | 6.25322000  | -0.78242600 | -1.55558000 |
| C | 6.55131700  | 0.11104500  | 0.66343400  |
| C | 7.34259800  | -0.03545700 | -2.00604700 |
| H | 5.74472700  | -1.45660700 | -2.23889800 |
| C | 7.64395300  | 0.85636300  | 0.21466200  |
| H | 6.28372700  | 0.13769500  | 1.71313200  |
| C | 8.03519900  | 0.79536700  | -1.12362900 |
| H | 7.65777500  | -0.11516500 | -3.04212000 |
| H | 8.19817400  | 1.47218900  | 0.91673700  |
| H | 8.88613000  | 1.37316800  | -1.47107400 |
| C | -3.02827800 | 0.20381300  | -0.71018400 |
| C | -1.88385100 | -0.69163000 | -0.65781900 |
| C | -2.38291300 | -2.02585100 | -1.03568100 |
| H | -1.80736500 | -2.50826500 | -1.83524900 |

|                           |             |             |             |
|---------------------------|-------------|-------------|-------------|
| H                         | -2.24597300 | -2.65165800 | -0.12792300 |
| O                         | -3.75189900 | -1.93467800 | -1.39414500 |
| H                         | -2.89965700 | 0.50578800  | -1.79035300 |
| C                         | -3.05422600 | 1.46754000  | 0.11298600  |
| C                         | -3.42643500 | 2.68312300  | -0.47829200 |
| C                         | -2.72710600 | 1.43955500  | 1.47743700  |
| C                         | -3.46212900 | 3.85308400  | 0.28222600  |
| H                         | -3.69423200 | 2.70769700  | -1.53041100 |
| C                         | -2.76392000 | 2.61035100  | 2.23457400  |
| H                         | -2.46622000 | 0.49791800  | 1.95247200  |
| C                         | -3.12995200 | 3.81948000  | 1.63804200  |
| H                         | -3.75046400 | 4.78944300  | -0.18547100 |
| H                         | -2.51888300 | 2.57602700  | 3.29186600  |
| H                         | -3.16274100 | 4.72957100  | 2.22919400  |
| <b>TS<sub>33-34</sub></b> |             |             |             |
| C                         | 4.32927900  | -0.59934700 | -0.85830500 |
| C                         | 3.07756000  | -0.23750100 | -0.02099600 |
| C                         | 1.92117900  | -0.67535500 | -0.68661900 |
| C                         | 2.37333800  | -1.27187300 | -1.99708500 |
| H                         | 1.90048500  | -0.72648700 | -2.82359900 |
| H                         | 2.09810400  | -2.32971900 | -2.08952700 |
| C                         | 3.10944100  | 0.53181100  | 1.24533400  |
| C                         | 3.82106800  | 0.08561700  | 2.37155800  |
| C                         | 2.42551000  | 1.75758700  | 1.29613400  |
| C                         | 3.83629600  | 0.85634000  | 3.53261100  |
| H                         | 4.32526800  | -0.87419200 | 2.34952900  |
| C                         | 2.46783900  | 2.53463900  | 2.45309100  |
| H                         | 1.88809200  | 2.10761900  | 0.42087000  |
| C                         | 3.16882400  | 2.08336500  | 3.57297300  |
| H                         | 4.37142200  | 0.49861200  | 4.40655300  |
| H                         | 1.95396700  | 3.49043000  | 2.47905200  |
| H                         | 3.19547500  | 2.68565400  | 4.47580200  |
| C                         | 4.99738800  | -1.83402100 | -0.19287200 |
| O                         | 4.34724900  | -2.59816500 | 0.50314800  |
| O                         | 6.25755500  | -2.00488600 | -0.54794200 |
| C                         | 6.89239400  | -3.22794000 | -0.09742200 |
| H                         | 6.36299800  | -4.09192800 | -0.50297000 |
| H                         | 7.90974600  | -3.17909500 | -0.48024500 |
| H                         | 6.88608000  | -3.27379500 | 0.99312600  |
| C                         | 5.22435400  | 0.60350700  | -1.11740600 |
| C                         | 6.13535800  | 1.04741400  | -0.14965300 |
| C                         | 5.10962600  | 1.30112800  | -2.32487300 |
| C                         | 6.91784800  | 2.17555000  | -0.38770900 |
| H                         | 6.24572500  | 0.51251200  | 0.78814600  |
| C                         | 5.89607800  | 2.42988800  | -2.56041600 |
| H                         | 4.42603700  | 0.94270500  | -3.08559800 |
| C                         | 6.79929800  | 2.87094700  | -1.59326600 |

|    |             |             |             |
|----|-------------|-------------|-------------|
| H  | 7.62527000  | 2.50711600  | 0.36609800  |
| H  | 5.80607400  | 2.95847800  | -3.50448900 |
| H  | 7.41353400  | 3.74670600  | -1.77888700 |
| O  | 3.79459800  | -1.11316000 | -2.08132200 |
| H  | 2.47939000  | -1.41326800 | 0.22187300  |
| Au | -0.07452500 | -0.50490000 | -0.16351700 |
| P  | -2.46088100 | -0.37922300 | 0.38019400  |
| C  | -3.12748600 | 1.24921300  | -0.36087000 |
| C  | -4.44568200 | 1.62572500  | -0.72845200 |
| C  | -2.10143300 | 2.20686800  | -0.50281100 |
| C  | -4.65220400 | 2.93416400  | -1.20933700 |
| C  | -2.33479700 | 3.49722400  | -0.96910900 |
| H  | -1.08470700 | 1.93067700  | -0.24179700 |
| C  | -3.62725400 | 3.86643500  | -1.32764000 |
| H  | -5.66198700 | 3.21219800  | -1.49426900 |
| H  | -1.50991800 | 4.19753200  | -1.05766200 |
| H  | -3.83881000 | 4.86361700  | -1.70093900 |
| C  | -3.23001300 | -2.03610900 | -0.35313000 |
| C  | -2.62186100 | -0.20404100 | 2.33150600  |
| C  | -3.26948100 | -1.84898400 | -1.87899300 |
| H  | -3.59737800 | -2.78823900 | -2.33913100 |
| H  | -3.96523900 | -1.06913400 | -2.18485000 |
| H  | -2.27895000 | -1.61010800 | -2.28071500 |
| C  | -4.61301100 | -2.39628300 | 0.20657700  |
| H  | -4.95421300 | -3.31478400 | -0.28543200 |
| H  | -4.57539000 | -2.60323700 | 1.27972700  |
| H  | -5.36032500 | -1.62716000 | 0.02451300  |
| C  | -2.24898000 | -3.18389100 | -0.03608200 |
| H  | -2.15450800 | -3.38449800 | 1.03204900  |
| H  | -2.63452700 | -4.09482100 | -0.50811600 |
| H  | -1.24985900 | -2.99743600 | -0.44220000 |
| C  | -2.16607900 | -1.51337600 | 2.99454100  |
| H  | -2.86676200 | -2.33422600 | 2.82366100  |
| H  | -1.17181600 | -1.82326500 | 2.65728900  |
| H  | -2.11170800 | -1.35402400 | 4.07760200  |
| C  | -4.04926500 | 0.14794200  | 2.76405000  |
| H  | -4.08311800 | 0.20023700  | 3.85866400  |
| H  | -4.34502600 | 1.12678200  | 2.38022600  |
| H  | -4.78530700 | -0.59113900 | 2.44302400  |
| C  | -1.67560600 | 0.93473700  | 2.75274900  |
| H  | -1.94015200 | 1.88498500  | 2.28086700  |
| H  | -1.75636800 | 1.07083900  | 3.83747800  |
| H  | -0.63026200 | 0.70895300  | 2.52073500  |
| C  | -5.69415200 | 0.79046400  | -0.71525400 |
| C  | -6.15427700 | 0.21933500  | -1.91357900 |
| C  | -6.52016700 | 0.71740500  | 0.41626900  |
| C  | -7.36866100 | -0.46661400 | -1.96132500 |
| H  | -5.56384700 | 0.33026400  | -2.81854800 |



|           |             |             |             |
|-----------|-------------|-------------|-------------|
| C         | -7.73742200 | 0.03413100  | 0.36912100  |
| H         | -6.22376500 | 1.21456400  | 1.33227000  |
| C         | -8.15941500 | -0.57075300 | -0.81568500 |
| H         | -7.70197300 | -0.90596300 | -2.89674500 |
| H         | -8.36200100 | -0.01127700 | 1.25636600  |
| H         | -9.10685700 | -1.09967200 | -0.85170200 |
| <b>34</b> |             |             |             |
| C         | 3.33437000  | 0.90941700  | -0.47107500 |
| C         | 2.88854300  | -0.57622900 | -0.44626800 |
| C         | 2.58389700  | -0.92693100 | -1.75334400 |
| C         | 2.92262900  | 0.21586700  | -2.67799800 |
| H         | 2.17832800  | 0.43116100  | -3.44929100 |
| H         | 3.88966000  | 0.01372200  | -3.15952800 |
| C         | 3.13948300  | -1.51140800 | 0.67148500  |
| C         | 3.83456700  | -1.09641500 | 1.82252100  |
| C         | 2.74298200  | -2.86243300 | 0.58149700  |
| C         | 4.13054100  | -2.00303300 | 2.84057400  |
| H         | 4.15476700  | -0.06668200 | 1.92901200  |
| C         | 3.03129800  | -3.76045000 | 1.60226800  |
| H         | 2.20044800  | -3.21391200 | -0.29064100 |
| C         | 3.72982600  | -3.33425300 | 2.73727500  |
| H         | 4.67612100  | -1.66327700 | 3.71520200  |
| H         | 2.71794900  | -4.79585200 | 1.51177600  |
| H         | 3.95935000  | -4.03747900 | 3.53170200  |
| C         | 4.89951300  | 0.87952200  | -0.42489300 |
| O         | 5.53846500  | 0.18859700  | -1.18882200 |
| O         | 5.42696500  | 1.68907600  | 0.49527200  |
| C         | 6.87445900  | 1.73105900  | 0.53324000  |
| H         | 7.26331700  | 2.08301300  | -0.42396800 |
| H         | 7.12107500  | 2.42698300  | 1.33305100  |
| H         | 7.27339300  | 0.73634000  | 0.74132800  |
| C         | 2.67280800  | 1.89523900  | 0.48402800  |
| C         | 1.83564300  | 1.50596800  | 1.53649800  |
| C         | 2.87637000  | 3.26553900  | 0.25433700  |
| C         | 1.22480100  | 2.46552900  | 2.35126800  |
| H         | 1.65995700  | 0.45746900  | 1.74642000  |
| C         | 2.26316400  | 4.21917700  | 1.06214800  |
| H         | 3.51331500  | 3.58258500  | -0.56403800 |
| C         | 1.43663500  | 3.82249000  | 2.11781800  |
| H         | 0.58742300  | 2.14307600  | 3.16925500  |
| H         | 2.43405400  | 5.27418500  | 0.87069100  |
| H         | 0.96655300  | 4.56732700  | 2.75279000  |
| O         | 3.00042000  | 1.34355700  | -1.80613600 |
| H         | 2.54636600  | -1.95070600 | -2.11041400 |
| Au        | 0.48826100  | -0.54595800 | -0.91475000 |
| P         | -1.93830100 | -0.38191900 | -0.78584800 |
| C         | -2.43128000 | -0.80062500 | 1.00877900  |

|   |             |             |             |
|---|-------------|-------------|-------------|
| C | -3.59974400 | -0.45303000 | 1.73538400  |
| C | -1.46906000 | -1.61390900 | 1.64284300  |
| C | -3.72932700 | -0.94145000 | 3.05083200  |
| C | -1.63004000 | -2.09480500 | 2.93875600  |
| H | -0.56363300 | -1.88004600 | 1.10707000  |
| C | -2.77394200 | -1.75273000 | 3.65331300  |
| H | -4.62195100 | -0.66668900 | 3.60379500  |
| H | -0.86138200 | -2.72160700 | 3.37989600  |
| H | -2.92319700 | -2.10703400 | 4.66852000  |
| C | -2.34137000 | 1.44244600  | -1.41002600 |
| C | -2.65268600 | -1.82354100 | -1.91940200 |
| C | -1.95574800 | 2.38636600  | -0.26050000 |
| H | -2.09123500 | 3.41933400  | -0.60098900 |
| H | -2.58066100 | 2.24392800  | 0.61976000  |
| H | -0.90713000 | 2.26866700  | 0.02877800  |
| C | -3.80198700 | 1.63770700  | -1.84151400 |
| H | -3.92849300 | 2.68091800  | -2.15351100 |
| H | -4.05946900 | 1.01312100  | -2.70125900 |
| H | -4.51399700 | 1.44422300  | -1.04179700 |
| C | -1.41805000 | 1.74280300  | -2.60884000 |
| H | -1.61023500 | 1.10317400  | -3.47158300 |
| H | -1.60552100 | 2.77667800  | -2.92011000 |
| H | -0.35881500 | 1.66887900  | -2.34398700 |
| C | -2.33152200 | -1.51609700 | -3.38967800 |
| H | -2.89895100 | -0.66491400 | -3.77296700 |
| H | -1.26479800 | -1.32827100 | -3.54879400 |
| H | -2.60591900 | -2.38802100 | -3.99419000 |
| C | -4.16270200 | -2.00162500 | -1.72313200 |
| H | -4.51276300 | -2.78957100 | -2.40008000 |
| H | -4.39115100 | -2.32060800 | -0.70382900 |
| H | -4.73032500 | -1.09613500 | -1.94392500 |
| C | -1.93708600 | -3.12017800 | -1.50052100 |
| H | -2.10910600 | -3.36628900 | -0.44937400 |
| H | -2.33269100 | -3.94574700 | -2.10309900 |
| H | -0.85752200 | -3.06641700 | -1.67424100 |
| C | -4.74569800 | 0.41527500  | 1.30089800  |
| C | -4.80480600 | 1.75051200  | 1.73381400  |
| C | -5.85859900 | -0.11748800 | 0.63317500  |
| C | -5.91165000 | 2.54951500  | 1.44404400  |
| H | -3.98492800 | 2.15966800  | 2.31704700  |
| C | -6.96835000 | 0.68024400  | 0.34531000  |
| H | -5.87096500 | -1.16562400 | 0.35867900  |
| C | -6.99310000 | 2.01909300  | 0.73847000  |
| H | -5.93380200 | 3.58104000  | 1.78248200  |
| H | -7.81979700 | 0.24851800  | -0.17227000 |
| H | -7.85725900 | 2.63768900  | 0.51677100  |

|    |             |             |             |
|----|-------------|-------------|-------------|
| C  | -3.22377400 | 1.96375600  | 0.65900400  |
| C  | -2.96180200 | 3.37433400  | 0.15080200  |
| C  | -1.69558900 | 3.95301200  | 0.28986200  |
| C  | -3.99278500 | 4.09988000  | -0.46152200 |
| C  | -1.45635200 | 5.24397400  | -0.18491000 |
| H  | -0.89950100 | 3.40282300  | 0.78436500  |
| C  | -3.75256500 | 5.39145700  | -0.92687300 |
| H  | -4.97825400 | 3.65680100  | -0.55505900 |
| C  | -2.48433800 | 5.96367500  | -0.79480000 |
| H  | -0.47343100 | 5.69000600  | -0.06704100 |
| H  | -4.55652600 | 5.95360700  | -1.39201200 |
| H  | -2.30147600 | 6.96990900  | -1.15918700 |
| Au | -0.29659400 | 0.08000100  | -0.26321100 |
| C  | -3.26510400 | 1.02268100  | -0.55439600 |
| O  | -2.28369200 | 0.40004400  | -1.00272000 |
| O  | -4.42088200 | 0.99176200  | -1.16307800 |
| C  | -4.54729600 | 0.17119600  | -2.35366200 |
| H  | -4.38916200 | -0.87657300 | -2.09351900 |
| H  | -5.56523400 | 0.33682600  | -2.70015100 |
| H  | -3.82217400 | 0.48870600  | -3.10451600 |
| P  | 1.94055900  | -0.41972900 | 0.39722100  |
| C  | 2.93084600  | -0.65647400 | -1.21776400 |
| C  | 4.32542900  | -0.54031700 | -1.45500600 |
| C  | 2.10372100  | -1.05315900 | -2.28934500 |
| C  | 4.80195400  | -0.83123800 | -2.74875700 |
| C  | 2.60365300  | -1.34530800 | -3.55460000 |
| H  | 1.03301600  | -1.13357800 | -2.13264600 |
| C  | 3.97032100  | -1.23238900 | -3.78837100 |
| H  | 5.86840600  | -0.73388000 | -2.92525100 |
| H  | 1.92422400  | -1.64794100 | -4.34509800 |
| H  | 4.38762800  | -1.44683600 | -4.76725500 |
| C  | 2.48461000  | 1.08249500  | 1.54592900  |
| C  | 1.89707800  | -2.17151100 | 1.28917900  |
| C  | 2.70841900  | 2.27771400  | 0.60567000  |
| H  | 2.91233200  | 3.16687400  | 1.21313600  |
| H  | 3.55875000  | 2.12701700  | -0.05744700 |
| H  | 1.82234900  | 2.48394900  | -0.00388100 |
| C  | 3.72628300  | 0.79401500  | 2.40173000  |
| H  | 3.95865300  | 1.69653600  | 2.97877400  |
| H  | 3.54629400  | -0.00895000 | 3.12154300  |
| H  | 4.60436700  | 0.54475200  | 1.81100100  |
| C  | 1.30394100  | 1.41079500  | 2.48144600  |
| H  | 1.08238400  | 0.61075700  | 3.18897200  |
| H  | 1.57502000  | 2.29888000  | 3.06336400  |
| H  | 0.39063300  | 1.64079700  | 1.92520300  |
| C  | 1.17262600  | -2.04071900 | 2.63749000  |
| H  | 1.74922000  | -1.46943300 | 3.36885400  |
| H  | 0.18302400  | -1.58481200 | 2.53331200  |

|           |             |             |             |
|-----------|-------------|-------------|-------------|
| H         | 1.03096900  | -3.04534700 | 3.05174500  |
| C         | 3.31123000  | -2.72904300 | 1.48937100  |
| H         | 3.23773700  | -3.68701700 | 2.01698800  |
| H         | 3.79849700  | -2.92063000 | 0.53079000  |
| H         | 3.94830600  | -2.07048300 | 2.08251100  |
| C         | 1.10511800  | -3.12070600 | 0.37270400  |
| H         | 1.57070700  | -3.23088400 | -0.61015700 |
| H         | 1.08167300  | -4.11204200 | 0.83975200  |
| H         | 0.07131200  | -2.78935200 | 0.23347100  |
| C         | 5.40404700  | -0.10371800 | -0.50543900 |
| C         | 5.88032800  | 1.21694800  | -0.56192800 |
| C         | 6.08624000  | -1.02308300 | 0.30571400  |
| C         | 6.95848700  | 1.62416300  | 0.22520100  |
| H         | 5.41409900  | 1.92402100  | -1.24212700 |
| C         | 7.16702600  | -0.61734100 | 1.09189000  |
| H         | 5.78855600  | -2.06512500 | 0.30677000  |
| C         | 7.59827800  | 0.70975900  | 1.06382500  |
| H         | 7.30673300  | 2.65121300  | 0.17060200  |
| H         | 7.68130800  | -1.34424200 | 1.71348200  |
| H         | 8.44038200  | 1.02344200  | 1.67298500  |
| C         | -4.50417000 | -1.57767100 | 1.23686700  |
| C         | -4.53077600 | -0.46567500 | 1.72462600  |
| C         | -4.56655300 | 0.87221500  | 2.31867700  |
| H         | -5.53005600 | 1.04967200  | 2.80560500  |
| H         | -3.78382100 | 0.95823300  | 3.08825900  |
| O         | -4.43299200 | 1.94799400  | 1.37884600  |
| C         | -2.37861200 | 1.63224100  | 1.28010800  |
| C         | -4.50687400 | -2.88020600 | 0.64705500  |
| C         | -3.45032100 | -3.78121200 | 0.88479200  |
| C         | -5.57578700 | -3.27973100 | -0.18016400 |
| C         | -3.46331000 | -5.04643600 | 0.30254000  |
| H         | -2.63571200 | -3.48311800 | 1.53737900  |
| C         | -5.57860200 | -4.54588400 | -0.76024500 |
| H         | -6.39950600 | -2.59380900 | -0.35065900 |
| C         | -4.52382200 | -5.43072600 | -0.52227900 |
| H         | -2.64891100 | -5.73778200 | 0.49715900  |
| H         | -6.40834200 | -4.84613700 | -1.39281000 |
| H         | -4.53165800 | -6.41874000 | -0.97223700 |
| <b>35</b> |             |             |             |
| C         | 4.76223600  | -1.01754000 | 0.15508900  |
| C         | 6.22841300  | -0.92451700 | -0.22267100 |
| C         | 6.76673900  | -1.84321400 | -1.13304600 |
| C         | 7.05100600  | 0.05349200  | 0.34281600  |
| C         | 8.11589500  | -1.77474300 | -1.47701800 |
| H         | 6.12468500  | -2.60065800 | -1.57161900 |
| C         | 8.40286400  | 0.11674900  | 0.00115900  |
| H         | 6.63664400  | 0.76613800  | 1.05127000  |

|    |             |             |             |
|----|-------------|-------------|-------------|
| C  | 8.93639500  | -0.79643700 | -0.90957300 |
| H  | 8.52810300  | -2.48646200 | -2.18600600 |
| H  | 9.03636500  | 0.88002100  | 0.44298600  |
| H  | 9.98750800  | -0.74604800 | -1.17742000 |
| Au | -0.16463800 | 0.44006900  | -0.40940500 |
| C  | 4.51875600  | -2.28801500 | 0.98991300  |
| O  | 3.98262400  | -3.29576400 | 0.58163200  |
| O  | 4.99753100  | -2.12347600 | 2.23113800  |
| C  | 4.92254500  | -3.28015200 | 3.09120700  |
| H  | 5.48577600  | -4.10983600 | 2.65899400  |
| H  | 5.36252000  | -2.96893800 | 4.03746900  |
| H  | 3.88299300  | -3.58587300 | 3.22944000  |
| P  | -2.59022600 | 0.31305900  | -0.52192000 |
| C  | -3.04368500 | -1.52211200 | -0.27222800 |
| C  | -4.25090700 | -2.11018900 | 0.18721400  |
| C  | -1.99104100 | -2.37840300 | -0.65741600 |
| C  | -4.32483200 | -3.51658700 | 0.23417500  |
| C  | -2.09565900 | -3.76518800 | -0.61381800 |
| H  | -1.05684200 | -1.94612300 | -1.00205600 |
| C  | -3.27757800 | -4.34220200 | -0.15990200 |
| H  | -5.24804100 | -3.95995600 | 0.59352100  |
| H  | -1.25642300 | -4.37998300 | -0.92348700 |
| H  | -3.38569000 | -5.42103100 | -0.10747200 |
| C  | -3.21401700 | 1.55945600  | 0.86681900  |
| C  | -3.10986600 | 0.78319100  | -2.35976900 |
| C  | -2.94487900 | 0.86853100  | 2.21327400  |
| H  | -3.18863400 | 1.56931400  | 3.01991500  |
| H  | -3.55635400 | -0.02173300 | 2.35098600  |
| H  | -1.89120300 | 0.59001800  | 2.32084300  |
| C  | -4.68859000 | 1.96285500  | 0.72261400  |
| H  | -4.94559500 | 2.62237200  | 1.55974300  |
| H  | -4.86740200 | 2.52757700  | -0.19649400 |
| H  | -5.36737100 | 1.11367900  | 0.74950800  |
| C  | -2.34061100 | 2.82823300  | 0.78855100  |
| H  | -2.45639800 | 3.37145900  | -0.15041300 |
| H  | -2.65413000 | 3.49891500  | 1.59668900  |
| H  | -1.27813300 | 2.61047600  | 0.93496400  |
| C  | -2.82287500 | 2.27283000  | -2.60083200 |
| H  | -3.49331200 | 2.92572500  | -2.03703600 |
| H  | -1.78806800 | 2.53802200  | -2.36164100 |
| H  | -2.97974900 | 2.48777700  | -3.66394100 |
| C  | -4.58534400 | 0.46589200  | -2.62715800 |
| H  | -4.82926400 | 0.77017300  | -3.65158800 |
| H  | -4.77598000 | -0.60680000 | -2.55056600 |
| H  | -5.26334000 | 0.99248600  | -1.95301200 |
| C  | -2.23328800 | -0.06386600 | -3.29906600 |
| H  | -2.38179200 | -1.13643600 | -3.14838400 |
| H  | -2.51009600 | 0.16582700  | -4.33424800 |

|                           |             |             |             |
|---------------------------|-------------|-------------|-------------|
| H                         | -1.16897500 | 0.16278000  | -3.18017300 |
| C                         | -5.49517600 | -1.42682000 | 0.67761500  |
| C                         | -5.72738800 | -1.32210400 | 2.05938100  |
| C                         | -6.52524900 | -1.05659000 | -0.20001200 |
| C                         | -6.92385000 | -0.79450000 | 2.54706900  |
| H                         | -4.97198100 | -1.67411200 | 2.75607500  |
| C                         | -7.72432300 | -0.53130900 | 0.28690200  |
| H                         | -6.40164300 | -1.20137200 | -1.26674300 |
| C                         | -7.92242400 | -0.38670600 | 1.66085400  |
| H                         | -7.08024200 | -0.71694900 | 3.61882200  |
| H                         | -8.50914800 | -0.25089000 | -0.40927700 |
| H                         | -8.85589000 | 0.01904800  | 2.03852300  |
| C                         | 2.11759700  | 1.36345000  | -0.03738300 |
| C                         | 2.01034400  | 0.19748600  | -0.46271400 |
| C                         | 2.60459300  | -1.10176300 | -0.92721700 |
| H                         | 2.28665400  | -1.91133200 | -0.26050600 |
| H                         | 2.22346600  | -1.32533200 | -1.92734200 |
| O                         | 4.00574700  | -1.04001600 | -1.05114300 |
| H                         | 4.48978700  | -0.15147600 | 0.77430400  |
| C                         | 2.29033500  | 2.69570000  | 0.43068000  |
| C                         | 2.34888400  | 2.96006300  | 1.81677600  |
| C                         | 2.44428600  | 3.75253200  | -0.49328700 |
| C                         | 2.55749500  | 4.25992600  | 2.26368600  |
| H                         | 2.23751200  | 2.14253500  | 2.52186000  |
| C                         | 2.65295100  | 5.04763900  | -0.03224800 |
| H                         | 2.40705700  | 3.54065800  | -1.55680900 |
| C                         | 2.70841800  | 5.30175600  | 1.34216000  |
| H                         | 2.60665100  | 4.46376500  | 3.32842800  |
| H                         | 2.77660100  | 5.85966000  | -0.74139900 |
| H                         | 2.87293200  | 6.31471300  | 1.69651300  |
| <b>TS<sub>35-36</sub></b> |             |             |             |
| C                         | 4.72558300  | -1.04610000 | -0.14751000 |
| C                         | 5.80264500  | -0.79647800 | -1.15214400 |
| C                         | 5.74542700  | -1.45448400 | -2.39482700 |
| C                         | 6.85696200  | 0.09820800  | -0.89210400 |
| C                         | 6.73540300  | -1.23444800 | -3.34714200 |
| H                         | 4.93681800  | -2.14617700 | -2.59634700 |
| C                         | 7.84022500  | 0.31475400  | -1.85452200 |
| H                         | 6.90336000  | 0.62450500  | 0.05297200  |
| C                         | 7.78496400  | -0.35029800 | -3.08107100 |
| H                         | 6.69093300  | -1.75707200 | -4.29745000 |
| H                         | 8.65231500  | 1.00357600  | -1.64437600 |
| H                         | 8.55625400  | -0.18189700 | -3.82634300 |
| Au                        | -0.12228100 | -0.59268100 | 0.26559300  |
| C                         | 5.09023000  | -1.05782400 | 1.35140900  |
| O                         | 5.00109700  | -2.05561500 | 2.02594300  |
| O                         | 5.47165400  | 0.14691300  | 1.79016500  |

|   |             |             |             |
|---|-------------|-------------|-------------|
| C | 5.85820800  | 0.20930100  | 3.18646600  |
| H | 6.70859900  | -0.44993700 | 3.36929900  |
| H | 6.12594400  | 1.24906200  | 3.36454600  |
| H | 5.02227600  | -0.09297300 | 3.81983000  |
| P | -2.56495200 | -0.56506900 | 0.41693200  |
| C | -3.15173400 | 1.17060800  | -0.12044600 |
| C | -4.40594900 | 1.60825700  | -0.62168800 |
| C | -2.14253700 | 2.13666900  | 0.07436500  |
| C | -4.57092200 | 2.98206300  | -0.88802900 |
| C | -2.33619800 | 3.49004800  | -0.18592800 |
| H | -1.17030800 | 1.81877200  | 0.43706000  |
| C | -3.56623900 | 3.91935800  | -0.67343500 |
| H | -5.53061800 | 3.30788000  | -1.27666800 |
| H | -1.52535100 | 4.19176000  | -0.01676900 |
| H | -3.74459600 | 4.96764900  | -0.89233800 |
| C | -3.16181100 | -2.06214300 | -0.71321700 |
| C | -3.03870000 | -0.74419700 | 2.31671700  |
| C | -2.97152900 | -1.60117500 | -2.16750000 |
| H | -3.20500200 | -2.43920700 | -2.83433700 |
| H | -3.62966800 | -0.77451400 | -2.43000800 |
| H | -1.93673700 | -1.29959500 | -2.36115100 |
| C | -4.60325100 | -2.51795300 | -0.44743700 |
| H | -4.83999900 | -3.33296300 | -1.14156100 |
| H | -4.72208700 | -2.91412600 | 0.56474700  |
| H | -5.33596300 | -1.72891400 | -0.60201200 |
| C | -2.20807100 | -3.24661000 | -0.45690900 |
| H | -2.27160000 | -3.63613700 | 0.56018900  |
| H | -2.48913000 | -4.05801200 | -1.13808800 |
| H | -1.16588600 | -2.98437900 | -0.66334900 |
| C | -2.66267600 | -2.15308600 | 2.80128700  |
| H | -3.30774000 | -2.92697500 | 2.37834400  |
| H | -1.62042400 | -2.40151000 | 2.57734300  |
| H | -2.78366000 | -2.19018200 | 3.89002400  |
| C | -4.52532100 | -0.46870300 | 2.56780400  |
| H | -4.73470300 | -0.60955600 | 3.63484400  |
| H | -4.78115400 | 0.56333700  | 2.31773400  |
| H | -5.18169200 | -1.13803700 | 2.00871200  |
| C | -2.19916400 | 0.29525500  | 3.08101400  |
| H | -2.40170500 | 1.31599100  | 2.74553400  |
| H | -2.45681200 | 0.23833700  | 4.14494900  |
| H | -1.12616300 | 0.10210700  | 2.98396500  |
| C | -5.61710500 | 0.78540200  | -0.95831200 |
| C | -5.86507000 | 0.43748300  | -2.29675900 |
| C | -6.61024700 | 0.51192900  | -0.00590400 |
| C | -7.03607300 | -0.22941300 | -2.65950400 |
| H | -5.14187500 | 0.70744000  | -3.06092200 |
| C | -7.78415100 | -0.15263800 | -0.36791800 |
| H | -6.47737900 | 0.83777500  | 1.01892200  |

|           |             |             |             |
|-----------|-------------|-------------|-------------|
| C         | -7.99513900 | -0.53681300 | -1.69290600 |
| H         | -7.20374400 | -0.49522500 | -3.69894200 |
| H         | -8.53975700 | -0.35588600 | 0.38516600  |
| H         | -8.90875000 | -1.05177200 | -1.97370400 |
| C         | 2.67335500  | 0.38316900  | 0.00773300  |
| C         | 1.95938300  | -0.70084800 | 0.12505000  |
| C         | 2.59262700  | -2.07702000 | 0.13276600  |
| H         | 2.69013300  | -2.44526700 | 1.15970400  |
| H         | 2.02190600  | -2.79667200 | -0.45323500 |
| O         | 3.88876600  | -2.04206300 | -0.50169400 |
| H         | 3.94153100  | -0.00991400 | -0.21435100 |
| C         | 2.72385400  | 1.82605100  | 0.10896500  |
| C         | 2.32651500  | 2.46716600  | 1.30092900  |
| C         | 3.19177200  | 2.60042200  | -0.97150100 |
| C         | 2.36416700  | 3.85575400  | 1.39024000  |
| H         | 1.98465300  | 1.86697700  | 2.13790600  |
| C         | 3.23447900  | 3.98754100  | -0.86961400 |
| H         | 3.51009000  | 2.10678500  | -1.88449500 |
| C         | 2.81917300  | 4.61642500  | 0.30826600  |
| H         | 2.04787000  | 4.34637800  | 2.30563500  |
| H         | 3.58911000  | 4.57980900  | -1.70712300 |
| H         | 2.85454000  | 5.69890100  | 0.38488200  |
| <b>36</b> |             |             |             |
| C         | 5.02260400  | -1.16353200 | -0.19681900 |
| C         | 6.33707600  | -1.05058200 | -0.77319600 |
| C         | 6.51024200  | -1.30872000 | -2.15804300 |
| C         | 7.46467300  | -0.72839500 | 0.02187800  |
| C         | 7.77202200  | -1.23816600 | -2.72309100 |
| H         | 5.64768600  | -1.55937100 | -2.76413500 |
| C         | 8.72504700  | -0.66976000 | -0.55662900 |
| H         | 7.34703500  | -0.52005800 | 1.07736300  |
| C         | 8.88035400  | -0.92143900 | -1.92388800 |
| H         | 7.90314900  | -1.43119700 | -3.78250800 |
| H         | 9.58814100  | -0.42633900 | 0.05354900  |
| H         | 9.86854000  | -0.87135600 | -2.37108100 |
| Au        | -0.00887800 | -0.36508800 | 0.08658800  |
| C         | 4.74878500  | -0.97273500 | 1.29660700  |
| O         | 4.21199400  | -1.84783700 | 1.93663200  |
| O         | 5.18792900  | 0.19554700  | 1.74578000  |
| C         | 4.91107100  | 0.47995700  | 3.14556300  |
| H         | 5.35742600  | -0.28883700 | 3.77810700  |
| H         | 5.35902200  | 1.45388500  | 3.32963300  |
| H         | 3.83172500  | 0.51118400  | 3.30290000  |
| P         | -2.44190000 | -0.57438600 | 0.43937500  |
| C         | -3.25549000 | 0.99803300  | -0.28210100 |
| C         | -4.57724100 | 1.24122300  | -0.74099500 |
| C         | -2.34275700 | 2.07302700  | -0.30087900 |

|   |             |             |             |
|---|-------------|-------------|-------------|
| C | -4.90174300 | 2.54209400  | -1.17437600 |
| C | -2.69152400 | 3.35215300  | -0.72455500 |
| H | -1.31977000 | 1.90518300  | 0.01785100  |
| C | -3.98863700 | 3.59138700  | -1.16558400 |
| H | -5.91266800 | 2.71751600  | -1.52896600 |
| H | -1.94479600 | 4.14011000  | -0.71600600 |
| H | -4.28927900 | 4.57678400  | -1.50836800 |
| C | -2.94597800 | -2.25913000 | -0.43680100 |
| C | -2.81228800 | -0.53749100 | 2.36813400  |
| C | -2.87470100 | -1.98629700 | -1.94880200 |
| H | -3.04449500 | -2.92692100 | -2.48571400 |
| H | -3.63145400 | -1.27511500 | -2.27674000 |
| H | -1.89025800 | -1.60604500 | -2.24114500 |
| C | -4.31822500 | -2.81540400 | -0.03168800 |
| H | -4.50397300 | -3.73065400 | -0.60679000 |
| H | -4.34836400 | -3.09186500 | 1.02601200  |
| H | -5.13515900 | -2.12683300 | -0.23533100 |
| C | -1.86668600 | -3.30538400 | -0.08797800 |
| H | -1.85144200 | -3.56515500 | 0.97171900  |
| H | -2.09015900 | -4.22099500 | -0.64804700 |
| H | -0.86509100 | -2.97112200 | -0.37436100 |
| C | -2.26485600 | -1.82057600 | 3.01270300  |
| H | -2.84237500 | -2.70584800 | 2.73559900  |
| H | -1.21393700 | -1.99202700 | 2.75898900  |
| H | -2.33015600 | -1.71918000 | 4.10236200  |
| C | -4.30477100 | -0.37827500 | 2.67597600  |
| H | -4.44524600 | -0.38791300 | 3.76361000  |
| H | -4.68070900 | 0.57806900  | 2.30573300  |
| H | -4.91313900 | -1.18045500 | 2.25374200  |
| C | -2.05090700 | 0.67412500  | 2.93533600  |
| H | -2.37750300 | 1.61418100  | 2.48234000  |
| H | -2.24516100 | 0.73869100  | 4.01252300  |
| H | -0.97049300 | 0.57481400  | 2.79201600  |
| C | -5.71333500 | 0.26760900  | -0.88013800 |
| C | -5.99064600 | -0.29381200 | -2.13784400 |
| C | -6.62447100 | 0.04143200  | 0.16238400  |
| C | -7.10290900 | -1.11473500 | -2.32835500 |
| H | -5.33805200 | -0.07002200 | -2.97671300 |
| C | -7.73931500 | -0.77827100 | -0.02685700 |
| H | -6.47458900 | 0.52353600  | 1.12117200  |
| C | -7.97550500 | -1.36921400 | -1.26892500 |
| H | -7.29375200 | -1.54331300 | -3.30778400 |
| H | -8.43072800 | -0.94172300 | 0.79458800  |
| H | -8.84330500 | -2.00501400 | -1.41567100 |
| C | 2.74111600  | 0.90834700  | -0.49775100 |
| C | 2.02060200  | -0.21916700 | -0.32366500 |
| C | 2.59935500  | -1.57819900 | -0.53638900 |
| H | 2.55413500  | -2.20898000 | 0.35128600  |

|                           |             |             |             |
|---------------------------|-------------|-------------|-------------|
| H                         | 2.16434000  | -2.09950700 | -1.39006700 |
| O                         | 4.07250700  | -1.57023200 | -0.95177700 |
| H                         | 3.75449600  | 0.84020800  | -0.90565200 |
| C                         | 2.33507200  | 2.30383200  | -0.24757200 |
| C                         | 1.43311800  | 2.67149400  | 0.76740400  |
| C                         | 2.90350100  | 3.32560200  | -1.02978500 |
| C                         | 1.08491900  | 4.00748700  | 0.96490000  |
| H                         | 1.02375200  | 1.90291500  | 1.41587800  |
| C                         | 2.55051900  | 4.66010900  | -0.83880800 |
| H                         | 3.61712200  | 3.06433600  | -1.80751100 |
| C                         | 1.63604700  | 5.00692800  | 0.15832200  |
| H                         | 0.39476300  | 4.27181100  | 1.76130900  |
| H                         | 2.99213500  | 5.42995100  | -1.46465600 |
| H                         | 1.36820900  | 6.04724600  | 0.31661300  |
| <b>TS<sub>36-33</sub></b> |             |             |             |
| C                         | 4.48535200  | 1.30405100  | -0.17980300 |
| C                         | 5.02658800  | 0.76090500  | 1.05891000  |
| C                         | 6.03877200  | -0.22974900 | 1.07790000  |
| C                         | 4.49885700  | 1.22128800  | 2.29097300  |
| C                         | 6.50573400  | -0.72500200 | 2.29061300  |
| H                         | 6.44705000  | -0.59422800 | 0.14615800  |
| C                         | 4.98566600  | 0.73070700  | 3.49264600  |
| H                         | 3.72925000  | 1.98348000  | 2.28359400  |
| C                         | 5.98962700  | -0.24738200 | 3.49748300  |
| H                         | 7.28078600  | -1.48460100 | 2.29356000  |
| H                         | 4.58927300  | 1.10803800  | 4.43001600  |
| H                         | 6.36542700  | -0.63350900 | 4.44023000  |
| Au                        | 0.02229300  | 0.24288500  | -0.21299800 |
| C                         | 5.33659800  | 1.32525100  | -1.44438000 |
| O                         | 6.24696600  | 0.56329200  | -1.69009700 |
| O                         | 4.92094600  | 2.29658100  | -2.27263800 |
| C                         | 5.67513700  | 2.42868300  | -3.50066500 |
| H                         | 5.60753900  | 1.51076000  | -4.08873100 |
| H                         | 5.21974200  | 3.26436200  | -4.02901300 |
| H                         | 6.72290400  | 2.63577200  | -3.27633000 |
| P                         | -2.32379700 | -0.38746800 | 0.21836900  |
| C                         | -3.28168700 | 1.22186100  | 0.58903700  |
| C                         | -4.66086700 | 1.52925900  | 0.45621500  |
| C                         | -2.42938700 | 2.21578000  | 1.11417000  |
| C                         | -5.09783300 | 2.80729900  | 0.85823100  |
| C                         | -2.88958800 | 3.46552700  | 1.51849200  |
| H                         | -1.36880900 | 2.00443300  | 1.20580100  |
| C                         | -4.24144800 | 3.76666300  | 1.38739900  |
| H                         | -6.15292800 | 3.03676600  | 0.74732200  |
| H                         | -2.19241900 | 4.19351000  | 1.92183100  |
| H                         | -4.62822200 | 4.73579400  | 1.68688900  |
| C                         | -2.87471600 | -1.37541500 | -1.39383200 |

|   |             |             |             |
|---|-------------|-------------|-------------|
| C | -2.38071300 | -1.44656000 | 1.87561900  |
| C | -3.03614700 | -0.32292900 | -2.50317300 |
| H | -3.25407100 | -0.83814600 | -3.44575100 |
| H | -3.85537500 | 0.36658100  | -2.30519500 |
| H | -2.11724300 | 0.25576500  | -2.64541500 |
| C | -4.14897700 | -2.21327300 | -1.22290500 |
| H | -4.37607100 | -2.69346600 | -2.18219900 |
| H | -4.01440000 | -3.01336000 | -0.48934100 |
| H | -5.01429600 | -1.61950200 | -0.93724800 |
| C | -1.71063800 | -2.30974600 | -1.78333300 |
| H | -1.52611000 | -3.09362000 | -1.04764900 |
| H | -1.97663800 | -2.80097300 | -2.72647300 |
| H | -0.77677100 | -1.76328400 | -1.94583900 |
| C | -1.71088700 | -2.80712200 | 1.63023000  |
| H | -2.30272100 | -3.45037600 | 0.97512000  |
| H | -0.70648800 | -2.70534100 | 1.20761600  |
| H | -1.61499100 | -3.32517600 | 2.59156500  |
| C | -3.81292700 | -1.63802100 | 2.38593600  |
| H | -3.78496200 | -2.24494300 | 3.29875400  |
| H | -4.27028000 | -0.67989200 | 2.64378900  |
| H | -4.45375400 | -2.14932900 | 1.66526700  |
| C | -1.57298300 | -0.66531800 | 2.92780300  |
| H | -1.99867000 | 0.32194600  | 3.12598400  |
| H | -1.58935800 | -1.22711600 | 3.86905900  |
| H | -0.52697500 | -0.53946300 | 2.62979200  |
| C | -5.75958300 | 0.66986900  | -0.10135500 |
| C | -6.19430600 | 0.87364200  | -1.42163000 |
| C | -6.49567200 | -0.20279800 | 0.71403800  |
| C | -7.28743800 | 0.17261900  | -1.93272900 |
| H | -5.68222000 | 1.60018500  | -2.04600000 |
| C | -7.59187300 | -0.90252500 | 0.20480400  |
| H | -6.22621700 | -0.32062100 | 1.75706300  |
| C | -7.98372400 | -0.72650400 | -1.12313900 |
| H | -7.60249100 | 0.34087100  | -2.95822400 |
| H | -8.14803100 | -1.57370000 | 0.85255400  |
| H | -8.83735800 | -1.26913000 | -1.51754300 |
| C | 2.97928500  | -0.05778300 | -1.03546000 |
| C | 1.93087400  | 0.77935400  | -0.65620300 |
| C | 2.34473800  | 2.23953500  | -0.62752800 |
| H | 2.32138300  | 2.63850200  | -1.65626100 |
| H | 1.68819500  | 2.85675900  | -0.01378400 |
| O | 3.64116700  | 2.36382500  | -0.03111800 |
| H | 3.45574300  | 0.28689200  | -1.95477300 |
| C | 3.12868700  | -1.49417300 | -0.77920600 |
| C | 3.82110600  | -2.29521100 | -1.70555500 |
| C | 2.64810800  | -2.08724000 | 0.40377900  |
| C | 3.99170900  | -3.65865600 | -1.47667300 |
| H | 4.22254000  | -1.84525300 | -2.60971400 |

|                    |             |             |             |
|--------------------|-------------|-------------|-------------|
| C                  | 2.82250100  | -3.45052500 | 0.63080900  |
| H                  | 2.15069200  | -1.47172800 | 1.14774300  |
| C                  | 3.48923600  | -4.24041100 | -0.31018600 |
| H                  | 4.51948000  | -4.26605300 | -2.20529700 |
| H                  | 2.45088200  | -3.89678200 | 1.54847400  |
| H                  | 3.62703200  | -5.30200800 | -0.12923700 |
| TS <sub>8-37</sub> |             |             |             |
| C                  | 3.46071500  | 0.77573400  | 0.20939600  |
| C                  | 4.73511400  | 1.52612400  | -0.09229200 |
| C                  | 4.97326400  | 1.81674300  | -1.44364500 |
| C                  | 5.61444500  | 1.99165300  | 0.89028600  |
| C                  | 6.09459900  | 2.55938400  | -1.80851000 |
| H                  | 4.28347600  | 1.45562400  | -2.19506500 |
| C                  | 6.73708200  | 2.73399300  | 0.51577100  |
| H                  | 5.42973100  | 1.75834800  | 1.93188800  |
| C                  | 6.97922900  | 3.01873700  | -0.82918400 |
| H                  | 6.27686100  | 2.77707100  | -2.85630000 |
| H                  | 7.42149500  | 3.08862100  | 1.28009100  |
| H                  | 7.85362400  | 3.59543400  | -1.11434700 |
| Au                 | 0.12675800  | -0.69058400 | 0.52256300  |
| C                  | 2.28342400  | 1.76768300  | 0.18322400  |
| O                  | 1.81357500  | 2.29537400  | 1.17414700  |
| O                  | 1.97720300  | 2.06051000  | -1.07336900 |
| C                  | 1.02761400  | 3.13440600  | -1.28160300 |
| H                  | 1.32404500  | 4.01117900  | -0.70361900 |
| H                  | 1.06387000  | 3.34161700  | -2.34975500 |
| H                  | 0.03042900  | 2.81042200  | -0.98184200 |
| P                  | -2.34690000 | -0.65618000 | 0.41966800  |
| C                  | -2.89515600 | 1.17499300  | 0.36518500  |
| C                  | -4.08433500 | 1.78193700  | -0.11763500 |
| C                  | -1.93241900 | 2.00026600  | 0.98558100  |
| C                  | -4.23944100 | 3.17247600  | 0.05952100  |
| C                  | -2.10581300 | 3.37352400  | 1.13728300  |
| H                  | -1.01077400 | 1.56190600  | 1.35264100  |
| C                  | -3.27431000 | 3.96666800  | 0.66864500  |
| H                  | -5.15293800 | 3.62963300  | -0.30772700 |
| H                  | -1.33022300 | 3.96198400  | 1.61762000  |
| H                  | -3.43963900 | 5.03409900  | 0.77916400  |
| C                  | -2.79879300 | -1.73563900 | -1.15552400 |
| C                  | -3.05367000 | -1.37555900 | 2.10341400  |
| C                  | -2.38711300 | -0.88342400 | -2.36708400 |
| H                  | -2.60259300 | -1.44361100 | -3.28417700 |
| H                  | -2.93248400 | 0.05825900  | -2.41874200 |
| H                  | -1.31371600 | -0.66634300 | -2.35093500 |
| C                  | -4.27291400 | -2.17351300 | -1.23691200 |
| H                  | -4.42262100 | -2.71379300 | -2.17849200 |
| H                  | -4.53805900 | -2.85975400 | -0.42811500 |

|   |             |             |             |
|---|-------------|-------------|-------------|
| H | -4.94995400 | -1.32388000 | -1.22061100 |
| C | -1.92192300 | -3.01400900 | -1.12784400 |
| H | -2.22125500 | -3.72250500 | -0.35292100 |
| H | -2.03682000 | -3.50922700 | -2.09855700 |
| H | -0.85911600 | -2.78987800 | -0.99260900 |
| C | -2.74717900 | -2.88018200 | 2.17419000  |
| H | -3.36625400 | -3.46764500 | 1.49120700  |
| H | -1.69430300 | -3.09569800 | 1.96316800  |
| H | -2.95639100 | -3.23584400 | 3.18954000  |
| C | -4.56059100 | -1.13087000 | 2.24984500  |
| H | -4.90602200 | -1.59179000 | 3.18268200  |
| H | -4.77774900 | -0.06136800 | 2.30965500  |
| H | -5.14518800 | -1.55758800 | 1.43302500  |
| C | -2.32228600 | -0.64941000 | 3.24891900  |
| H | -2.48394400 | 0.43281000  | 3.21865700  |
| H | -2.71680900 | -1.01613900 | 4.20359200  |
| H | -1.24509300 | -0.84225400 | 3.23448900  |
| C | -5.23034800 | 1.13646900  | -0.84402500 |
| C | -5.27753300 | 1.18645900  | -2.24643500 |
| C | -6.34817600 | 0.63734600  | -0.15869500 |
| C | -6.37591100 | 0.68340900  | -2.94561200 |
| H | -4.45536700 | 1.63889500  | -2.79332100 |
| C | -7.44748400 | 0.13312300  | -0.85579500 |
| H | -6.36947000 | 0.66389200  | 0.92487200  |
| C | -7.45906400 | 0.14198900  | -2.25188200 |
| H | -6.38909000 | 0.72655200  | -4.03060600 |
| H | -8.30110400 | -0.25226400 | -0.30614100 |
| H | -8.31537200 | -0.24811700 | -2.79348200 |
| C | 3.22801700  | -0.59832800 | -0.22549100 |
| C | 2.13397200  | -1.02824700 | 0.61628900  |
| C | 2.81196200  | -1.22840600 | 1.89124700  |
| H | 2.22509400  | -1.28395000 | 2.80334400  |
| H | 3.75815900  | -1.76100500 | 1.93777100  |
| O | 3.48505500  | 0.39238600  | 1.95014800  |
| H | 2.80146800  | 1.02573000  | 2.27665700  |
| C | 4.20525000  | -1.56755000 | -0.65974400 |
| C | 5.61391400  | -1.39517800 | -0.73567300 |
| C | 3.66633500  | -2.82933700 | -1.03550200 |
| C | 6.42404900  | -2.44112500 | -1.14703600 |
| H | 6.06562400  | -0.46024900 | -0.43322100 |
| C | 4.49256200  | -3.87791300 | -1.43014400 |
| H | 2.58806500  | -2.94651700 | -1.05983600 |
| C | 5.87189900  | -3.68540200 | -1.49315000 |
| H | 7.49972400  | -2.30013400 | -1.18625500 |
| H | 4.05929100  | -4.83156800 | -1.71457300 |
| H | 6.52044600  | -4.49243200 | -1.81998100 |

37

|    |             |             |             |
|----|-------------|-------------|-------------|
| C  | 3.19117200  | 1.01222100  | -0.01799000 |
| C  | 4.24722100  | 2.00081100  | -0.23647300 |
| C  | 5.27129900  | 1.80570300  | -1.19323400 |
| C  | 4.21694200  | 3.22425600  | 0.47821000  |
| C  | 6.21478700  | 2.79813300  | -1.42638800 |
| H  | 5.30202300  | 0.89454900  | -1.77489400 |
| C  | 5.18875800  | 4.19320000  | 0.26706400  |
| H  | 3.45413300  | 3.38895600  | 1.23171000  |
| C  | 6.18659100  | 3.98690100  | -0.69066900 |
| H  | 6.97808400  | 2.64370200  | -2.18215700 |
| H  | 5.16782000  | 5.11168300  | 0.84455200  |
| H  | 6.93768200  | 4.75113600  | -0.86545900 |
| Au | 0.22445300  | -0.91032900 | 0.11986900  |
| C  | 1.87866300  | 1.66562300  | 0.36684400  |
| O  | 1.52009200  | 1.77411100  | 1.52093400  |
| O  | 1.29612100  | 2.23316600  | -0.69121200 |
| C  | 0.17304800  | 3.10658300  | -0.41172800 |
| H  | 0.49528000  | 3.92338000  | 0.23765000  |
| H  | -0.13766100 | 3.48772400  | -1.38273500 |
| H  | -0.63334300 | 2.55287700  | 0.06937400  |
| P  | -2.23893200 | -0.80536800 | -0.03182700 |
| C  | -2.84001400 | 0.67090700  | 1.01945200  |
| C  | -4.04162500 | 1.42574800  | 0.96211300  |
| C  | -1.91440300 | 0.97416400  | 2.04043300  |
| C  | -4.24197400 | 2.42858000  | 1.93125000  |
| C  | -2.14352200 | 1.96256000  | 2.99404500  |
| H  | -0.97874700 | 0.42759500  | 2.09068800  |
| C  | -3.32264300 | 2.69857800  | 2.93999700  |
| H  | -5.16064600 | 3.00446000  | 1.87805200  |
| H  | -1.39718400 | 2.15321500  | 3.75863100  |
| H  | -3.52708800 | 3.47813900  | 3.66748200  |
| C  | -2.64840800 | -0.72412200 | -1.95313000 |
| C  | -2.93240800 | -2.41233400 | 0.87421300  |
| C  | -2.28915700 | 0.70044500  | -2.40741400 |
| H  | -2.42720600 | 0.76940600  | -3.49268100 |
| H  | -2.92324800 | 1.45584900  | -1.94483400 |
| H  | -1.24171400 | 0.93404200  | -2.19023600 |
| C  | -4.09627000 | -1.08229700 | -2.31413100 |
| H  | -4.21821700 | -0.97600200 | -3.39859200 |
| H  | -4.33123700 | -2.12080800 | -2.06572600 |
| H  | -4.82731100 | -0.43627500 | -1.83357900 |
| C  | -1.69729800 | -1.70365300 | -2.67257800 |
| H  | -1.88549900 | -2.74736000 | -2.41629500 |
| H  | -1.85824500 | -1.59789400 | -3.75177200 |
| H  | -0.64550300 | -1.47879600 | -2.46954800 |
| C  | -2.60155600 | -3.65651800 | 0.03571500  |
| H  | -3.16851300 | -3.69824600 | -0.89711000 |
| H  | -1.53430600 | -3.72461000 | -0.19649900 |

|           |             |             |             |
|-----------|-------------|-------------|-------------|
| H         | -2.86636900 | -4.54681300 | 0.61744400  |
| C         | -4.44232500 | -2.32449800 | 1.12094800  |
| H         | -4.77145800 | -3.24531500 | 1.61690000  |
| H         | -4.68484200 | -1.49137600 | 1.78461200  |
| H         | -5.01829100 | -2.21916700 | 0.19939300  |
| C         | -2.20120500 | -2.50548800 | 2.22584300  |
| H         | -2.38464100 | -1.62978600 | 2.85395700  |
| H         | -2.57940800 | -3.38175900 | 2.76526800  |
| H         | -1.12116100 | -2.62987700 | 2.10182600  |
| C         | -5.15861200 | 1.32709100  | -0.03769900 |
| C         | -5.21112100 | 2.22897200  | -1.11330500 |
| C         | -6.25652300 | 0.47916100  | 0.17283000  |
| C         | -6.29429900 | 2.23393300  | -1.99339600 |
| H         | -4.40541300 | 2.94467400  | -1.24969100 |
| C         | -7.34226200 | 0.48448300  | -0.70555600 |
| H         | -6.27318500 | -0.17456300 | 1.03701000  |
| C         | -7.35916800 | 1.35284300  | -1.79808800 |
| H         | -6.31163700 | 2.93580700  | -2.82185900 |
| H         | -8.18125300 | -0.18114200 | -0.52568100 |
| H         | -8.20458300 | 1.35789000  | -2.47920600 |
| C         | 3.35185200  | -0.37748700 | -0.01957700 |
| C         | 2.24612300  | -1.24884100 | 0.20702600  |
| C         | 2.59023300  | -2.67421200 | 0.53737800  |
| H         | 3.20920900  | -3.10560800 | -0.26407000 |
| H         | 3.24672900  | -2.66220900 | 1.42096800  |
| O         | 1.49781800  | -3.51186800 | 0.85735500  |
| H         | 1.06133400  | -3.77468200 | 0.03667500  |
| C         | 4.73506200  | -0.96869100 | -0.11459300 |
| C         | 5.62404000  | -0.85813500 | 0.96438200  |
| C         | 5.13799200  | -1.67373600 | -1.26055800 |
| C         | 6.89226300  | -1.43803500 | 0.89645800  |
| H         | 5.32350600  | -0.31518900 | 1.85617900  |
| C         | 6.40866600  | -2.24558100 | -1.32896400 |
| H         | 4.45996400  | -1.76080200 | -2.10652500 |
| C         | 7.28760300  | -2.13026900 | -0.24912000 |
| H         | 7.57020500  | -1.34727900 | 1.73959600  |
| H         | 6.71175500  | -2.78010600 | -2.22411200 |
| H         | 8.27503300  | -2.57817400 | -0.30122800 |
| <b>38</b> |             |             |             |
| C         | 3.85847100  | 0.47204400  | 0.23381700  |
| C         | 5.01959500  | -0.37131300 | 0.41982400  |
| C         | 5.77221100  | -0.77251200 | -0.71202600 |
| C         | 5.47290700  | -0.75878900 | 1.70462000  |
| C         | 6.93003800  | -1.52698700 | -0.56318900 |
| H         | 5.45304400  | -0.45081900 | -1.69879200 |
| C         | 6.62014300  | -1.52762900 | 1.84378700  |
| H         | 4.91068400  | -0.46637900 | 2.58490400  |

|    |             |             |             |
|----|-------------|-------------|-------------|
| C  | 7.35357900  | -1.90898400 | 0.71320600  |
| H  | 7.50731700  | -1.81042100 | -1.43730800 |
| H  | 6.95037000  | -1.83028000 | 2.83215900  |
| H  | 8.25762700  | -2.49865200 | 0.82954200  |
| Au | 0.25299600  | -0.88097400 | -0.57462100 |
| C  | 3.49584300  | 1.47081700  | 1.31189800  |
| O  | 2.35889800  | 1.65040700  | 1.70010100  |
| O  | 4.57431500  | 2.10278300  | 1.79504000  |
| C  | 4.31864000  | 3.06892100  | 2.84067900  |
| H  | 3.85762500  | 2.58106300  | 3.70197600  |
| H  | 5.29395000  | 3.47632700  | 3.10092900  |
| H  | 3.65503700  | 3.85399500  | 2.47225500  |
| P  | -2.10912800 | -0.89624000 | 0.09430900  |
| C  | -2.43727200 | 0.80320100  | 0.89951300  |
| C  | -3.65126900 | 1.51400500  | 1.09095000  |
| C  | -1.24786300 | 1.37347500  | 1.39954700  |
| C  | -3.59737000 | 2.74609000  | 1.77212700  |
| C  | -1.22471000 | 2.58749800  | 2.08000000  |
| H  | -0.30033400 | 0.86540700  | 1.25376800  |
| C  | -2.41418700 | 3.28324800  | 2.26905500  |
| H  | -4.52848900 | 3.28704100  | 1.90923600  |
| H  | -0.27695500 | 2.97367000  | 2.44079900  |
| H  | -2.42735200 | 4.23552700  | 2.79053200  |
| C  | -3.13479600 | -1.29472100 | -1.53403900 |
| C  | -2.29663900 | -2.23423100 | 1.52497900  |
| C  | -3.10285800 | -0.01661300 | -2.38815000 |
| H  | -3.57726300 | -0.22749500 | -3.35345000 |
| H  | -3.64475300 | 0.80572200  | -1.92364000 |
| H  | -2.07605400 | 0.30861400  | -2.58564400 |
| C  | -4.57528600 | -1.76091300 | -1.27928500 |
| H  | -5.06044000 | -1.92687200 | -2.24849400 |
| H  | -4.60673700 | -2.71156000 | -0.73960500 |
| H  | -5.16832600 | -1.03037800 | -0.73330000 |
| C  | -2.37810600 | -2.40142100 | -2.29734900 |
| H  | -2.34421300 | -3.34752000 | -1.75488100 |
| H  | -2.90533700 | -2.58292700 | -3.24101300 |
| H  | -1.35319000 | -2.10378000 | -2.54095000 |
| C  | -2.12180500 | -3.63963700 | 0.93024300  |
| H  | -2.95227400 | -3.92628800 | 0.28073200  |
| H  | -1.18521300 | -3.73681400 | 0.37271200  |
| H  | -2.08847400 | -4.36291900 | 1.75299100  |
| C  | -3.64400200 | -2.11873000 | 2.24551400  |
| H  | -3.70013300 | -2.89942100 | 3.01338300  |
| H  | -3.73559000 | -1.15492200 | 2.75119100  |
| H  | -4.49745600 | -2.24686200 | 1.57682100  |
| C  | -1.16222900 | -1.96386200 | 2.53002900  |
| H  | -1.22508900 | -0.96140500 | 2.96176800  |
| H  | -1.24637200 | -2.68511700 | 3.35124500  |



|                           |             |             |             |
|---------------------------|-------------|-------------|-------------|
| H                         | -0.17510300 | -2.08752300 | 2.07417300  |
| C                         | -5.03071600 | 1.14790500  | 0.62217900  |
| C                         | -5.54962000 | 1.75245200  | -0.53512400 |
| C                         | -5.89199600 | 0.36255400  | 1.40305400  |
| C                         | -6.86541300 | 1.52089500  | -0.93841100 |
| H                         | -4.92098000 | 2.42419800  | -1.11266600 |
| C                         | -7.21022400 | 0.13226400  | 1.00275600  |
| H                         | -5.54029200 | -0.05361500 | 2.33975900  |
| C                         | -7.69758000 | 0.70003500  | -0.17532400 |
| H                         | -7.24299400 | 1.99387500  | -1.84009100 |
| H                         | -7.85970400 | -0.47945300 | 1.62197100  |
| H                         | -8.72299100 | 0.52211300  | -0.48452000 |
| C                         | 2.93658500  | 0.40161100  | -0.85833000 |
| C                         | 2.31091100  | -0.86051300 | -0.88834400 |
| C                         | 2.96260100  | -2.20940300 | -0.85183100 |
| H                         | 3.34456300  | -2.36797400 | -1.87819400 |
| H                         | 3.84441700  | -2.24744800 | -0.20429700 |
| O                         | 2.13542800  | -3.27444300 | -0.43577800 |
| H                         | 1.37700500  | -3.32979600 | -1.03368900 |
| C                         | 2.47135200  | 1.62987100  | -1.52683800 |
| C                         | 3.29451400  | 2.77324700  | -1.45562800 |
| C                         | 1.32480600  | 1.69058300  | -2.34399000 |
| C                         | 2.95173200  | 3.94852300  | -2.11849000 |
| H                         | 4.22601200  | 2.73278200  | -0.89889100 |
| C                         | 0.98986400  | 2.86158700  | -3.01482700 |
| H                         | 0.69089000  | 0.81666400  | -2.45078800 |
| C                         | 1.79411100  | 3.99961100  | -2.89657900 |
| H                         | 3.60003500  | 4.81610900  | -2.04610900 |
| H                         | 0.10017300  | 2.88822500  | -3.63642400 |
| H                         | 1.53073300  | 4.91078900  | -3.42472600 |
| <b>TS<sub>38-39</sub></b> |             |             |             |
| C                         | 3.69375800  | 0.21712500  | 0.34839400  |
| C                         | 5.02745200  | -0.35708400 | 0.10079000  |
| C                         | 5.83743800  | 0.19532300  | -0.91257000 |
| C                         | 5.51819500  | -1.45346000 | 0.83922000  |
| C                         | 7.10438500  | -0.32462500 | -1.17217800 |
| H                         | 5.47973800  | 1.05180800  | -1.47683200 |
| C                         | 6.78452200  | -1.96458900 | 0.57893600  |
| H                         | 4.90142000  | -1.90058900 | 1.60991400  |
| C                         | 7.58097900  | -1.40313000 | -0.42551100 |
| H                         | 7.72107300  | 0.11856400  | -1.94779800 |
| H                         | 7.15193400  | -2.80820900 | 1.15467000  |
| H                         | 8.56961000  | -1.80601400 | -0.62267800 |
| Au                        | 0.33999600  | -0.59121400 | -0.50471000 |
| C                         | 3.15886100  | 0.45223300  | 1.72748800  |
| O                         | 1.99003900  | 0.71863500  | 1.95877900  |
| O                         | 4.10136000  | 0.34903800  | 2.67278900  |

|   |             |             |             |
|---|-------------|-------------|-------------|
| C | 3.65841800  | 0.55203400  | 4.03183100  |
| H | 2.91234500  | -0.19777800 | 4.30391600  |
| H | 4.55242600  | 0.44697600  | 4.64423600  |
| H | 3.22615400  | 1.54840900  | 4.14480000  |
| P | -2.03717600 | -0.87040600 | 0.00281100  |
| C | -2.58074200 | 0.73209100  | 0.88562100  |
| C | -3.86527300 | 1.32383400  | 1.00879900  |
| C | -1.49329700 | 1.35406500  | 1.53491200  |
| C | -3.98148400 | 2.50085500  | 1.77420100  |
| C | -1.64186500 | 2.50927800  | 2.29768000  |
| H | -0.49710300 | 0.93247300  | 1.44857500  |
| C | -2.89936400 | 3.09165700  | 2.41807800  |
| H | -4.96538900 | 2.95140000  | 1.85922800  |
| H | -0.77336500 | 2.94383100  | 2.78245200  |
| H | -3.04195700 | 3.99603000  | 3.00170700  |
| C | -2.89282200 | -1.24814200 | -1.72758700 |
| C | -2.20571200 | -2.31303400 | 1.32864700  |
| C | -2.90215000 | 0.08076100  | -2.50060500 |
| H | -3.28596600 | -0.10384200 | -3.51060000 |
| H | -3.54175900 | 0.82808500  | -2.03355500 |
| H | -1.89258300 | 0.49409500  | -2.59744400 |
| C | -4.30334500 | -1.84399000 | -1.61729200 |
| H | -4.69430500 | -1.99325200 | -2.63061200 |
| H | -4.29367300 | -2.82308600 | -1.13040200 |
| H | -4.99806100 | -1.19716300 | -1.08598400 |
| C | -1.98815700 | -2.23897700 | -2.48901400 |
| H | -1.92049900 | -3.21541400 | -2.00652700 |
| H | -2.42105000 | -2.39466600 | -3.48385400 |
| H | -0.97531500 | -1.84649400 | -2.62314100 |
| C | -1.85853900 | -3.65554000 | 0.66827000  |
| H | -2.60536400 | -3.96839000 | -0.06513400 |
| H | -0.87702200 | -3.63495500 | 0.18421100  |
| H | -1.82358200 | -4.42684100 | 1.44603500  |
| C | -3.61109200 | -2.36432400 | 1.93875900  |
| H | -3.65549200 | -3.19861600 | 2.64877200  |
| H | -3.83141900 | -1.45003100 | 2.49427000  |
| H | -4.39294100 | -2.51927100 | 1.19303200  |
| C | -1.18400900 | -2.01465200 | 2.44079100  |
| H | -1.37742500 | -1.05761800 | 2.93202800  |
| H | -1.26005300 | -2.80076800 | 3.20103200  |
| H | -0.15636400 | -2.00699400 | 2.06450100  |
| C | -5.16177000 | 0.87846900  | 0.39463100  |
| C | -5.63492200 | 1.51836900  | -0.76306500 |
| C | -6.01064600 | -0.02935300 | 1.04565700  |
| C | -6.88728700 | 1.20704500  | -1.29449900 |
| H | -5.02308800 | 2.27938400  | -1.23892700 |
| C | -7.26558100 | -0.33975600 | 0.51692100  |
| H | -5.70037200 | -0.48055900 | 1.98083900  |

|           |             |             |             |
|-----------|-------------|-------------|-------------|
| C         | -7.70278800 | 0.26759000  | -0.66119000 |
| H         | -7.23025000 | 1.70944300  | -2.19406800 |
| H         | -7.90671700 | -1.04609800 | 1.03595700  |
| H         | -8.67923900 | 0.02702600  | -1.07027900 |
| C         | 2.91661900  | 0.79830100  | -0.72375100 |
| C         | 2.41525000  | -0.46693500 | -0.93635100 |
| C         | 2.97547100  | -1.74502000 | -1.53796100 |
| H         | 2.63542800  | -1.74081600 | -2.58687000 |
| H         | 4.06702300  | -1.74027000 | -1.54452500 |
| O         | 2.58498800  | -2.91600200 | -0.86015500 |
| H         | 1.61854900  | -2.97000300 | -0.88253400 |
| C         | 2.51476200  | 2.14965900  | -1.00108300 |
| C         | 3.17251300  | 3.21011700  | -0.34164000 |
| C         | 1.54404000  | 2.43811700  | -1.98637900 |
| C         | 2.85281900  | 4.52771100  | -0.64724400 |
| H         | 3.93884100  | 2.98665700  | 0.39444500  |
| C         | 1.23280200  | 3.75578600  | -2.28934400 |
| H         | 1.04298000  | 1.62015400  | -2.49519200 |
| C         | 1.88340300  | 4.80063200  | -1.61799900 |
| H         | 3.35913600  | 5.34213800  | -0.13957000 |
| H         | 0.48811200  | 3.97892200  | -3.04652600 |
| H         | 1.63742000  | 5.83035600  | -1.85915300 |
| <b>39</b> |             |             |             |
| C         | 3.45557500  | -0.24909100 | 0.27234800  |
| C         | 4.95328400  | -0.17573100 | 0.07260200  |
| C         | 5.69179500  | 0.96701100  | 0.40533400  |
| C         | 5.62193900  | -1.28909500 | -0.46052400 |
| C         | 7.07283800  | 0.99825000  | 0.20621800  |
| H         | 5.19265200  | 1.83538000  | 0.82311200  |
| C         | 7.00247200  | -1.25625100 | -0.65677900 |
| H         | 5.05821600  | -2.18223500 | -0.71682800 |
| C         | 7.73074100  | -0.11207700 | -0.32476700 |
| H         | 7.63402000  | 1.89000700  | 0.46877500  |
| H         | 7.50809900  | -2.12430200 | -1.06886300 |
| H         | 8.80521900  | -0.08642600 | -0.47841900 |
| Au        | 0.38759600  | -0.40888800 | -0.34829300 |
| C         | 2.96374500  | -0.91314400 | 1.54248200  |
| O         | 1.78618500  | -1.11942900 | 1.80728300  |
| O         | 3.96184800  | -1.24355300 | 2.35429400  |
| C         | 3.60255900  | -1.89678100 | 3.59210600  |
| H         | 3.07989300  | -2.83294100 | 3.38609100  |
| H         | 4.54643900  | -2.08509900 | 4.10043200  |
| H         | 2.96255200  | -1.24600800 | 4.19147800  |
| P         | -2.01819200 | -0.74535600 | -0.30563100 |
| C         | -2.63379400 | 0.14045900  | 1.27071800  |
| C         | -3.90917200 | 0.68287400  | 1.57598800  |
| C         | -1.62842000 | 0.19936100  | 2.25899100  |

|   |             |             |             |
|---|-------------|-------------|-------------|
| C | -4.09611700 | 1.25759500  | 2.84893500  |
| C | -1.84821400 | 0.75872300  | 3.51457800  |
| H | -0.64356700 | -0.20428700 | 2.04982500  |
| C | -3.09515000 | 1.29828100  | 3.81323200  |
| H | -5.07199200 | 1.67638500  | 3.07347800  |
| H | -1.04368000 | 0.77398600  | 4.24313900  |
| H | -3.29107900 | 1.74739000  | 4.78197600  |
| C | -2.67609400 | -0.04497100 | -2.02580700 |
| C | -2.34762600 | -2.66503400 | -0.02273600 |
| C | -2.58164300 | 1.48616700  | -1.93196800 |
| H | -2.85359000 | 1.91231900  | -2.90457400 |
| H | -3.26120000 | 1.89902300  | -1.18830100 |
| H | -1.56317200 | 1.81274500  | -1.69693600 |
| C | -4.09694600 | -0.50427700 | -2.38345900 |
| H | -4.37894000 | -0.03613200 | -3.33365800 |
| H | -4.14842800 | -1.58642300 | -2.53139700 |
| H | -4.83778600 | -0.21797800 | -1.64050900 |
| C | -1.70532200 | -0.51981100 | -3.12531800 |
| H | -1.70980900 | -1.60197700 | -3.26365600 |
| H | -2.02184600 | -0.06692500 | -4.07181900 |
| H | -0.67879200 | -0.19824200 | -2.92574900 |
| C | -1.95051500 | -3.44328500 | -1.28597500 |
| H | -2.61765200 | -3.24592900 | -2.12817400 |
| H | -0.92258700 | -3.23038200 | -1.59706600 |
| H | -2.01064700 | -4.51531100 | -1.06728500 |
| C | -3.81465300 | -2.93547000 | 0.33219200  |
| H | -3.95127400 | -4.01588800 | 0.45801000  |
| H | -4.08449100 | -2.45943800 | 1.27766400  |
| H | -4.50825600 | -2.60029800 | -0.44102600 |
| C | -1.45547800 | -3.10371800 | 1.15187600  |
| H | -1.69940000 | -2.57111400 | 2.07461800  |
| H | -1.62284600 | -4.17179600 | 1.33266400  |
| H | -0.39131200 | -2.95823100 | 0.94379100  |
| C | -5.12866800 | 0.75572800  | 0.70260400  |
| C | -5.45343100 | 1.96329600  | 0.06234600  |
| C | -6.05975400 | -0.29295100 | 0.65623000  |
| C | -6.63925700 | 2.09427900  | -0.66192600 |
| H | -4.77963100 | 2.81103500  | 0.14843600  |
| C | -7.24866100 | -0.16175900 | -0.06495600 |
| H | -5.86731000 | -1.20814400 | 1.20377300  |
| C | -7.53645000 | 1.02747100  | -0.73644400 |
| H | -6.86754900 | 3.03469800  | -1.15457200 |
| H | -7.95615000 | -0.98531000 | -0.08791700 |
| H | -8.46181800 | 1.12962900  | -1.29491600 |
| C | 2.60675400  | 0.82335400  | -0.38510600 |
| C | 2.59607100  | -0.37249900 | -0.99805100 |
| C | 2.77597200  | -1.08525200 | -2.31018400 |
| H | 2.11635200  | -0.64091700 | -3.06820900 |

|                            |             |             |             |
|----------------------------|-------------|-------------|-------------|
| H                          | 3.81210500  | -0.92213500 | -2.62745900 |
| O                          | 2.61446400  | -2.48422400 | -2.20270000 |
| H                          | 1.70142700  | -2.66519500 | -1.94071100 |
| C                          | 2.40391700  | 2.25293300  | -0.41749800 |
| C                          | 2.61836900  | 3.02060300  | 0.74335100  |
| C                          | 1.99562000  | 2.89008800  | -1.60777600 |
| C                          | 2.43244900  | 4.39968300  | 0.71253700  |
| H                          | 2.92510800  | 2.52776400  | 1.66078500  |
| C                          | 1.81659500  | 4.26843100  | -1.63182400 |
| H                          | 1.83693400  | 2.29983700  | -2.50515800 |
| C                          | 2.03316900  | 5.02347000  | -0.47299000 |
| H                          | 2.59953400  | 4.98891000  | 1.60839300  |
| H                          | 1.51500700  | 4.75915700  | -2.55169600 |
| H                          | 1.89310100  | 6.09978200  | -0.49645300 |
| <b>TS</b> <sub>38-40</sub> |             |             |             |
| C                          | 4.20009500  | -0.14786400 | 0.64487800  |
| C                          | 5.34731600  | -0.71843700 | 0.03340000  |
| C                          | 5.62726200  | -0.42064000 | -1.33282500 |
| C                          | 6.27113900  | -1.52510600 | 0.75678500  |
| C                          | 6.77038300  | -0.91400100 | -1.93947100 |
| H                          | 4.95289900  | 0.23021700  | -1.87676800 |
| C                          | 7.40547700  | -2.01575700 | 0.13916700  |
| H                          | 6.07640400  | -1.76724800 | 1.79475400  |
| C                          | 7.65727700  | -1.71268300 | -1.20848400 |
| H                          | 6.98661200  | -0.66824600 | -2.97377600 |
| H                          | 8.10261600  | -2.63496800 | 0.69384700  |
| H                          | 8.55718500  | -2.09190500 | -1.68367200 |
| Au                         | 0.13302900  | -0.09536900 | -0.64788100 |
| C                          | 4.04808900  | -0.18214200 | 2.15118200  |
| O                          | 3.07421800  | -0.67826500 | 2.67246900  |
| O                          | 5.08952000  | 0.35278400  | 2.80029200  |
| C                          | 4.99576300  | 0.34114900  | 4.24808800  |
| H                          | 4.90302700  | -0.68405300 | 4.61099600  |
| H                          | 5.91929400  | 0.79820500  | 4.59815600  |
| H                          | 4.12735700  | 0.91912100  | 4.57041600  |
| P                          | -2.32779900 | 0.10736600  | -0.63526100 |
| C                          | -3.01002400 | -1.43532800 | 0.26865800  |
| C                          | -4.26785700 | -1.67251400 | 0.88426000  |
| C                          | -2.08501900 | -2.49926200 | 0.23095000  |
| C                          | -4.52308600 | -2.95796300 | 1.40194400  |
| C                          | -2.36455600 | -3.76250700 | 0.74400700  |
| H                          | -1.10949700 | -2.32648300 | -0.21168500 |
| C                          | -3.60164200 | -3.99732200 | 1.33444200  |
| H                          | -5.48541600 | -3.12828600 | 1.87440500  |
| H                          | -1.61523900 | -4.54607600 | 0.68716700  |
| H                          | -3.84785700 | -4.97099800 | 1.74674500  |
| C                          | -2.76719900 | 1.83438400  | 0.19091100  |

|   |             |             |             |
|---|-------------|-------------|-------------|
| C | -2.93834100 | -0.06285800 | -2.49826800 |
| C | -2.49673600 | 1.66760700  | 1.69573500  |
| H | -2.64203200 | 2.63643200  | 2.18791200  |
| H | -3.17437000 | 0.95378400  | 2.16181900  |
| H | -1.46667500 | 1.34839600  | 1.88599000  |
| C | -4.19666800 | 2.32680200  | -0.07434300 |
| H | -4.32875900 | 3.28823600  | 0.43609100  |
| H | -4.37326600 | 2.50179600  | -1.13904500 |
| H | -4.95945600 | 1.64756700  | 0.29885400  |
| C | -1.77284400 | 2.87455000  | -0.36004500 |
| H | -1.89052900 | 3.05266300  | -1.43025300 |
| H | -1.96259400 | 3.82475400  | 0.15293800  |
| H | -0.73537900 | 2.59460200  | -0.16507700 |
| C | -2.51490700 | 1.18580200  | -3.28763300 |
| H | -3.07988800 | 2.07511800  | -2.99788000 |
| H | -1.44617700 | 1.39737400  | -3.18216900 |
| H | -2.71232200 | 1.00869000  | -4.35129000 |
| C | -4.45356300 | -0.27166400 | -2.59785600 |
| H | -4.73170100 | -0.33966800 | -3.65641200 |
| H | -4.75261700 | -1.20721600 | -2.12003800 |
| H | -5.02567400 | 0.54531800  | -2.15462300 |
| C | -2.22603500 | -1.29556600 | -3.08464500 |
| H | -2.45235900 | -2.20753800 | -2.52553500 |
| H | -2.57247700 | -1.44397600 | -4.11417500 |
| H | -1.14005900 | -1.16257800 | -3.10937300 |
| C | -5.39428200 | -0.70607000 | 1.11935700  |
| C | -5.50964700 | -0.07314700 | 2.36833500  |
| C | -6.44452000 | -0.55941200 | 0.20094700  |
| C | -6.60461100 | 0.74075300  | 2.66165100  |
| H | -4.74423000 | -0.23608300 | 3.12136300  |
| C | -7.54188800 | 0.25343900  | 0.49357800  |
| H | -6.41503500 | -1.09654300 | -0.73975900 |
| C | -7.61956200 | 0.91603100  | 1.71946900  |
| H | -6.67025900 | 1.22544500  | 3.63122800  |
| H | -8.34263100 | 0.35587800  | -0.23288700 |
| H | -8.47397000 | 1.54613800  | 1.94698700  |
| C | 3.07511800  | 0.40926500  | -0.09495300 |
| C | 2.18821000  | -0.51752200 | -0.60846200 |
| C | 2.34805100  | -1.99767800 | -0.84660700 |
| H | 1.75627300  | -2.49810900 | -0.06105000 |
| H | 1.82443400  | -2.20152300 | -1.79515000 |
| O | 3.66114600  | -2.53272400 | -0.89119100 |
| H | 3.57722400  | -3.47446700 | -1.09012000 |
| C | 2.81683600  | 1.87259100  | -0.03369200 |
| C | 3.35517700  | 2.69800300  | 0.96987700  |
| C | 2.11502200  | 2.48612900  | -1.08854400 |
| C | 3.14111300  | 4.07540200  | 0.95353500  |
| H | 3.96102400  | 2.28072400  | 1.76574500  |

|           |             |             |             |
|-----------|-------------|-------------|-------------|
| C         | 1.92303200  | 3.86630200  | -1.11547900 |
| H         | 1.74494500  | 1.87602200  | -1.90635100 |
| C         | 2.42216700  | 4.66712800  | -0.08653400 |
| H         | 3.55465300  | 4.68962200  | 1.74765300  |
| H         | 1.39372800  | 4.31740800  | -1.94954700 |
| H         | 2.27417200  | 5.74236300  | -0.10738000 |
| <b>40</b> |             |             |             |
| C         | -2.23312800 | -0.73766400 | -0.78327600 |
| C         | -2.79664200 | -1.94794700 | -1.45479100 |
| H         | -2.45641500 | -2.84143200 | -0.90247600 |
| H         | -2.23751900 | -1.97820400 | -2.40966500 |
| C         | -3.00016600 | 0.42447800  | -0.49246500 |
| C         | -2.31190100 | 1.75301500  | -0.63540400 |
| C         | -1.72933800 | 2.11951900  | -1.85996000 |
| C         | -2.24464500 | 2.64789100  | 0.44473100  |
| C         | -1.09730100 | 3.35473100  | -2.00152500 |
| H         | -1.79880500 | 1.44633300  | -2.70917400 |
| C         | -1.60068900 | 3.87844300  | 0.30360600  |
| H         | -2.69245800 | 2.37851300  | 1.39626800  |
| C         | -1.02786200 | 4.23478000  | -0.91861400 |
| H         | -0.66809500 | 3.63367700  | -2.95909900 |
| H         | -1.54982700 | 4.55883500  | 1.14835300  |
| H         | -0.53646400 | 5.19657000  | -1.02958100 |
| C         | -4.32753400 | 0.41627200  | -0.05293300 |
| C         | -5.15025300 | 1.67810500  | -0.21380400 |
| O         | -5.52887400 | 2.05667800  | -1.29880300 |
| O         | -5.43981400 | 2.25098100  | 0.95908000  |
| C         | -6.23335900 | 3.46063300  | 0.88356400  |
| H         | -6.36222800 | 3.78553200  | 1.91440400  |
| H         | -5.70731500 | 4.21752000  | 0.29830700  |
| H         | -7.19828000 | 3.24941600  | 0.41887000  |
| C         | -4.97015400 | -0.69299700 | 0.61595000  |
| C         | -4.21674500 | -1.60780100 | 1.38730300  |
| C         | -6.37355600 | -0.86401100 | 0.53451500  |
| C         | -4.83722000 | -2.68668400 | 2.00729400  |
| H         | -3.15916000 | -1.42354400 | 1.54673700  |
| C         | -6.98236900 | -1.95032800 | 1.14298000  |
| H         | -6.96552200 | -0.17077200 | -0.05466300 |
| C         | -6.21674300 | -2.86571400 | 1.87897600  |
| H         | -4.25337200 | -3.37269900 | 2.61292300  |
| H         | -8.05468100 | -2.09009800 | 1.05149100  |
| H         | -6.70258200 | -3.70263100 | 2.37131500  |
| O         | -4.18319400 | -1.95206000 | -1.68770800 |
| P         | 2.25165000  | -0.83204300 | -0.19938800 |
| C         | 3.01784000  | -0.23304200 | -1.90789300 |
| C         | 2.71918000  | -2.67785500 | 0.29075800  |
| C         | 2.47015300  | -3.59787700 | -0.91470200 |

|    |             |             |             |
|----|-------------|-------------|-------------|
| H  | 3.19170400  | -3.43645500 | -1.71907300 |
| H  | 2.57776000  | -4.63840900 | -0.58718000 |
| H  | 1.45967400  | -3.48218000 | -1.31950200 |
| C  | 4.16869900  | -2.80736900 | 0.77110900  |
| H  | 4.32949700  | -2.23993000 | 1.69029800  |
| H  | 4.37313300  | -3.86094800 | 0.99600100  |
| H  | 4.89475700  | -2.47859000 | 0.02519500  |
| C  | 1.77263000  | -3.07823900 | 1.43687100  |
| H  | 0.72389200  | -3.05241600 | 1.12419500  |
| H  | 2.00871200  | -4.10316800 | 1.74591300  |
| H  | 1.88968100  | -2.43316100 | 2.31188700  |
| C  | 4.49432500  | -0.59965200 | -2.11018100 |
| H  | 4.63892700  | -1.68219400 | -2.16658100 |
| H  | 4.82537600  | -0.18185100 | -3.06842100 |
| H  | 5.14347000  | -0.20091100 | -1.33365500 |
| C  | 2.18704800  | -0.87445500 | -3.03866100 |
| H  | 1.12633600  | -0.61460500 | -2.96788900 |
| H  | 2.56207400  | -0.48764000 | -3.99331800 |
| H  | 2.27484000  | -1.96160400 | -3.06952600 |
| C  | 2.80119800  | 1.28869900  | -1.96026900 |
| H  | 1.74650300  | 1.55151500  | -1.82891800 |
| H  | 3.38604400  | 1.81661000  | -1.20854900 |
| H  | 3.11685400  | 1.65392800  | -2.94461900 |
| C  | 2.68161800  | 0.23928000  | 1.32006000  |
| C  | 3.90005600  | 0.85852700  | 1.70505900  |
| C  | 1.57850100  | 0.35101200  | 2.19198600  |
| C  | 3.93951000  | 1.53522000  | 2.94028500  |
| C  | 1.64781900  | 1.01564700  | 3.41298200  |
| H  | 0.63232100  | -0.09490900 | 1.90244200  |
| C  | 2.84429500  | 1.61416200  | 3.79382800  |
| H  | 4.87330600  | 2.00961400  | 3.22527500  |
| H  | 0.77023900  | 1.06747100  | 4.05008000  |
| H  | 2.92749500  | 2.14303100  | 4.73830900  |
| C  | 5.19211000  | 0.93602700  | 0.94153800  |
| C  | 5.49172800  | 2.09581700  | 0.20763800  |
| C  | 6.19554600  | -0.03307100 | 1.09029400  |
| C  | 6.72905900  | 2.24875000  | -0.41942900 |
| H  | 4.75546500  | 2.89182300  | 0.14457400  |
| C  | 7.43506300  | 0.11917900  | 0.46500600  |
| H  | 6.01728700  | -0.90112900 | 1.71388300  |
| C  | 7.70159200  | 1.25428200  | -0.30188800 |
| H  | 6.93680600  | 3.15110700  | -0.98675300 |
| H  | 8.19726500  | -0.64394000 | 0.59187600  |
| H  | 8.66638900  | 1.37313200  | -0.78538300 |
| Au | -0.19733200 | -0.75184800 | -0.52696100 |
| H  | -4.38370600 | -2.63797300 | -2.33759000 |

TS<sub>40-4a</sub>

|   |             |             |             |
|---|-------------|-------------|-------------|
| C | -2.20892200 | -0.73323800 | -0.60642100 |
| C | -2.80155000 | -1.98761800 | -1.20493500 |
| H | -2.85308600 | -2.76478700 | -0.42300800 |
| H | -2.11840300 | -2.36308800 | -1.97811000 |
| C | -3.03102200 | 0.32785300  | -0.29404600 |
| C | -2.50391300 | 1.68357000  | 0.04042000  |
| C | -1.52880800 | 2.31516300  | -0.75323400 |
| C | -2.98498300 | 2.35299900  | 1.18110600  |
| C | -1.02992100 | 3.56507600  | -0.39628700 |
| H | -1.18509800 | 1.82649300  | -1.65853700 |
| C | -2.48116800 | 3.60397600  | 1.53772000  |
| H | -3.74110200 | 1.88360400  | 1.80377300  |
| C | -1.50265400 | 4.21249600  | 0.75055500  |
| H | -0.27787700 | 4.04210300  | -1.01764900 |
| H | -2.85450500 | 4.10229300  | 2.42727800  |
| H | -1.11334300 | 5.18876000  | 1.02298800  |
| C | -4.48995100 | 0.22069400  | -0.27864400 |
| C | -5.29951900 | 1.04230300  | -1.26796400 |
| O | -6.25539300 | 0.57267800  | -1.85066200 |
| O | -4.81579700 | 2.26557700  | -1.46478300 |
| C | -5.50699700 | 3.05732800  | -2.46151400 |
| H | -5.00337800 | 4.02190900  | -2.45724700 |
| H | -5.42798200 | 2.57776100  | -3.43900400 |
| H | -6.55985900 | 3.16403800  | -2.19349700 |
| C | -5.16255400 | -0.59794100 | 0.68801800  |
| C | -4.40726400 | -1.13425800 | 1.77195000  |
| C | -6.56431500 | -0.85967200 | 0.64853100  |
| C | -5.01373100 | -1.92060000 | 2.73981600  |
| H | -3.35449800 | -0.89107900 | 1.85200100  |
| C | -7.15651600 | -1.64194900 | 1.62492900  |
| H | -7.15018100 | -0.47577700 | -0.17540700 |
| C | -6.38757500 | -2.17740600 | 2.66904300  |
| H | -4.42757300 | -2.31515400 | 3.56332500  |
| H | -8.22154800 | -1.84449300 | 1.57868800  |
| H | -6.86435800 | -2.78244700 | 3.43457200  |
| O | -4.08530400 | -1.72086800 | -1.76535900 |
| P | 2.28735700  | -0.85099100 | -0.10225500 |
| C | 3.04443100  | -0.81705700 | -1.91702500 |
| C | 2.67763200  | -2.50166900 | 0.89068400  |
| C | 2.34975200  | -3.71201100 | 0.00233100  |
| H | 3.05343300  | -3.82546800 | -0.82585200 |
| H | 2.41729500  | -4.62094900 | 0.61156300  |
| H | 1.33470600  | -3.65948900 | -0.40412100 |
| C | 4.13048300  | -2.56830000 | 1.37276400  |
| H | 4.34416500  | -1.76675200 | 2.08345000  |
| H | 4.28722500  | -3.52019000 | 1.89432500  |
| H | 4.85181000  | -2.51251400 | 0.55562700  |
| C | 1.74421600  | -2.50705700 | 2.11528100  |

|           |             |             |             |
|-----------|-------------|-------------|-------------|
| H         | 0.68990400  | -2.51786600 | 1.82160000  |
| H         | 1.94248600  | -3.41077900 | 2.70338100  |
| H         | 1.91472600  | -1.64429200 | 2.76486700  |
| C         | 4.49008300  | -1.32237100 | -2.01754500 |
| H         | 4.56825400  | -2.38082000 | -1.75373400 |
| H         | 4.81886400  | -1.22656400 | -3.05922800 |
| H         | 5.18382500  | -0.75778800 | -1.39847700 |
| C         | 2.14611500  | -1.69710700 | -2.81136500 |
| H         | 1.10504000  | -1.36025700 | -2.80730700 |
| H         | 2.51768900  | -1.62148400 | -3.83999800 |
| H         | 2.16832500  | -2.75203800 | -2.53311500 |
| C         | 2.91961600  | 0.63617000  | -2.40320800 |
| H         | 1.88280700  | 0.98533400  | -2.35572500 |
| H         | 3.54387600  | 1.32036600  | -1.83068700 |
| H         | 3.24128200  | 0.68668200  | -3.44999200 |
| C         | 2.82684300  | 0.58208300  | 1.04138400  |
| C         | 4.08538300  | 1.21713100  | 1.21407300  |
| C         | 1.75663500  | 1.00548900  | 1.85697400  |
| C         | 4.19414400  | 2.22171700  | 2.19613500  |
| C         | 1.89394200  | 1.99280900  | 2.82857900  |
| H         | 0.78011300  | 0.55208100  | 1.72101400  |
| C         | 3.12888300  | 2.60859200  | 3.00230100  |
| H         | 5.15854500  | 2.70486400  | 2.31820100  |
| H         | 1.03675200  | 2.27909700  | 3.43004000  |
| H         | 3.26541100  | 3.38553100  | 3.74835700  |
| C         | 5.35875900  | 0.99584600  | 0.44725100  |
| C         | 5.69954900  | 1.87482900  | -0.59427100 |
| C         | 6.31304400  | 0.05360700  | 0.85932000  |
| C         | 6.92607000  | 1.76826400  | -1.25148500 |
| H         | 5.00452400  | 2.65979000  | -0.87781500 |
| C         | 7.54210500  | -0.05272900 | 0.20459900  |
| H         | 6.10481500  | -0.58706500 | 1.70818500  |
| C         | 7.84774200  | 0.79548500  | -0.86063300 |
| H         | 7.16552800  | 2.45437900  | -2.05845700 |
| H         | 8.26594400  | -0.79018900 | 0.53876400  |
| H         | 8.80419500  | 0.71326400  | -1.36779500 |
| Au        | -0.16316900 | -0.72402000 | -0.39169200 |
| H         | -4.55121700 | -2.54869200 | -1.94443000 |
| <b>41</b> |             |             |             |
| C         | 2.73296700  | 0.43499000  | 1.11786200  |
| C         | 3.10096200  | 0.99103600  | 2.48640000  |
| H         | 3.72652200  | 0.24207800  | 2.99296200  |
| H         | 2.20366900  | 1.13344700  | 3.09401800  |
| C         | 2.70284900  | 0.84803800  | -0.17116100 |
| C         | 2.67910000  | 1.96721700  | -1.08463300 |
| C         | 2.51168600  | 3.27496000  | -0.57993800 |
| C         | 2.84829600  | 1.76725800  | -2.46819700 |

|   |             |             |             |
|---|-------------|-------------|-------------|
| C | 2.51664200  | 4.35695000  | -1.45331600 |
| H | 2.43000600  | 3.42207800  | 0.49244100  |
| C | 2.84692200  | 2.85645600  | -3.33387400 |
| H | 2.97880600  | 0.76126500  | -2.85369300 |
| C | 2.67844900  | 4.14922300  | -2.82800400 |
| H | 2.40556200  | 5.36453700  | -1.06535600 |
| H | 2.97948500  | 2.70192400  | -4.39988200 |
| H | 2.68037900  | 4.99772500  | -3.50548000 |
| C | 3.42972800  | -0.46442500 | 0.08205300  |
| C | 4.93700600  | -0.25089100 | 0.09165400  |
| O | 5.46169900  | 0.70724300  | 0.64013100  |
| O | 5.60983400  | -1.20304900 | -0.54693200 |
| C | 7.05090400  | -1.06541700 | -0.55935600 |
| H | 7.41702600  | -1.93264900 | -1.10571100 |
| H | 7.33585400  | -0.13878600 | -1.06130700 |
| H | 7.43600900  | -1.05733200 | 0.46195500  |
| C | 2.91921300  | -1.82978100 | -0.29427100 |
| C | 2.58994300  | -2.75060200 | 0.71048300  |
| C | 2.80949300  | -2.22280900 | -1.63485700 |
| C | 2.14507500  | -4.03306600 | 0.38311500  |
| H | 2.69091000  | -2.46254200 | 1.75367600  |
| C | 2.36311800  | -3.50343200 | -1.96415000 |
| H | 3.09062000  | -1.53226200 | -2.42437500 |
| C | 2.02843300  | -4.41139300 | -0.95577600 |
| H | 1.90096200  | -4.73791200 | 1.17226500  |
| H | 2.29118000  | -3.79712500 | -3.00735200 |
| H | 1.69026900  | -5.41073800 | -1.21228900 |
| O | 3.73862700  | 2.23885900  | 2.38423700  |
| P | -1.87860300 | -0.06152200 | 0.77258900  |
| C | -2.51744600 | 1.78149500  | 1.04672900  |
| C | -2.28342200 | -1.31010300 | 2.23836200  |
| C | -1.90269900 | -0.65855800 | 3.57633400  |
| H | -2.56198900 | 0.17115500  | 3.84183600  |
| H | -1.99513100 | -1.41153600 | 4.36718300  |
| H | -0.86754200 | -0.30221800 | 3.58237300  |
| C | -3.75952800 | -1.72360200 | 2.24139400  |
| H | -4.01488200 | -2.27554300 | 1.33424200  |
| H | -3.93283500 | -2.39305000 | 3.09207100  |
| H | -4.44030900 | -0.87604600 | 2.34129400  |
| C | -1.41083900 | -2.55588300 | 2.00967100  |
| H | -0.34291300 | -2.31984000 | 2.03761800  |
| H | -1.61871700 | -3.27652600 | 2.80901000  |
| H | -1.63049900 | -3.04503200 | 1.05716600  |
| C | -3.96444400 | 1.86966000  | 1.55299100  |
| H | -4.07516300 | 1.42366400  | 2.54528800  |
| H | -4.22941400 | 2.92927500  | 1.64615400  |
| H | -4.68235800 | 1.40758300  | 0.87926000  |
| C | -1.58905400 | 2.45703800  | 2.07625500  |

|                           |             |             |             |
|---------------------------|-------------|-------------|-------------|
| H                         | -0.54378500 | 2.45829800  | 1.75283700  |
| H                         | -1.90506900 | 3.50177100  | 2.17471300  |
| H                         | -1.64571200 | 2.00508900  | 3.06752000  |
| C                         | -2.34183800 | 2.49668400  | -0.30255300 |
| H                         | -1.30341600 | 2.45477900  | -0.64791700 |
| H                         | -2.98451000 | 2.08366800  | -1.07856100 |
| H                         | -2.60742300 | 3.55237300  | -0.17577000 |
| C                         | -2.42333700 | -0.91641700 | -0.84295100 |
| C                         | -3.67947100 | -0.90012700 | -1.50370400 |
| C                         | -1.39044900 | -1.70446300 | -1.39191700 |
| C                         | -3.82237700 | -1.67576000 | -2.67109100 |
| C                         | -1.56467000 | -2.47191500 | -2.53974800 |
| H                         | -0.41759500 | -1.72353900 | -0.91184900 |
| C                         | -2.79506500 | -2.45745400 | -3.18867000 |
| H                         | -4.78336100 | -1.65386000 | -3.17516500 |
| H                         | -0.73729600 | -3.06504900 | -2.91547100 |
| H                         | -2.95724200 | -3.04153800 | -4.08929200 |
| C                         | -4.91271300 | -0.12188100 | -1.14448400 |
| C                         | -5.20346700 | 1.06842900  | -1.83217600 |
| C                         | -5.88242900 | -0.64061400 | -0.27340700 |
| C                         | -6.39453400 | 1.75754400  | -1.59982400 |
| H                         | -4.49823000 | 1.44687500  | -2.56662000 |
| C                         | -7.07621300 | 0.04652300  | -0.04219700 |
| H                         | -5.71687100 | -1.59689100 | 0.20840800  |
| C                         | -7.33022700 | 1.25395000  | -0.69445600 |
| H                         | -6.59637900 | 2.67927900  | -2.13722800 |
| H                         | -7.81355300 | -0.37191400 | 0.63639900  |
| H                         | -8.25929900 | 1.78648100  | -0.51598100 |
| Au                        | 0.54645600  | 0.15881400  | 0.66675200  |
| H                         | 4.55261200  | 2.07754000  | 1.87531100  |
| <b>TS<sub>41-42</sub></b> |             |             |             |
| C                         | 2.51763500  | -0.87811100 | -0.64674000 |
| C                         | 2.92905500  | -1.44839600 | -2.01299400 |
| H                         | 2.83871000  | -0.67429000 | -2.77992800 |
| H                         | 2.19801000  | -2.23326400 | -2.24705700 |
| C                         | 3.22479400  | -0.61913200 | 0.52423200  |
| C                         | 3.09717900  | -0.97181400 | 1.91293400  |
| C                         | 2.30128500  | -2.06824600 | 2.31263800  |
| C                         | 3.88572900  | -0.30066600 | 2.87332800  |
| C                         | 2.28164700  | -2.46786200 | 3.64213300  |
| H                         | 1.70882100  | -2.59313500 | 1.56935400  |
| C                         | 3.86111800  | -0.70597300 | 4.20169500  |
| H                         | 4.51577500  | 0.52541800  | 2.56050500  |
| C                         | 3.05748100  | -1.78490600 | 4.58798400  |
| H                         | 1.67282400  | -3.31267000 | 3.94807200  |
| H                         | 4.46864600  | -0.18969900 | 4.93776800  |
| H                         | 3.04178700  | -2.10081000 | 5.62668400  |

|   |             |             |             |
|---|-------------|-------------|-------------|
| C | 3.71548700  | 0.52616600  | -0.17465700 |
| C | 4.90790400  | 0.39203100  | -1.10561000 |
| O | 4.99276300  | 0.92076100  | -2.19062700 |
| O | 5.88750900  | -0.29485900 | -0.49911200 |
| C | 7.07343300  | -0.49983900 | -1.30086500 |
| H | 7.76292100  | -1.05078700 | -0.66283600 |
| H | 6.81255500  | -1.07470900 | -2.19158200 |
| H | 7.50212900  | 0.45955200  | -1.59664500 |
| C | 3.27962200  | 1.89994800  | 0.16263400  |
| C | 2.16535300  | 2.11620100  | 1.00322000  |
| C | 3.96405600  | 3.03059400  | -0.33479700 |
| C | 1.76081000  | 3.40432300  | 1.33940400  |
| H | 1.61000900  | 1.27327100  | 1.39946200  |
| C | 3.55401000  | 4.31654900  | 0.00736900  |
| H | 4.80843600  | 2.90559600  | -0.99969800 |
| C | 2.45599600  | 4.51225200  | 0.84695600  |
| H | 0.90096600  | 3.54238000  | 1.98758100  |
| H | 4.09779100  | 5.16950700  | -0.38652100 |
| H | 2.14466200  | 5.51717900  | 1.11529400  |
| O | 4.24153400  | -1.95268100 | -2.09766600 |
| P | -2.03846300 | -0.57257100 | -0.64049000 |
| C | -2.71367100 | -1.95292700 | 0.58777100  |
| C | -2.51934300 | -0.86062600 | -2.52695500 |
| C | -2.21198700 | -2.31539100 | -2.91351000 |
| H | -2.88706800 | -3.02707600 | -2.43258500 |
| H | -2.34616400 | -2.42216800 | -3.99590700 |
| H | -1.17964800 | -2.59605300 | -2.68127100 |
| C | -3.99291500 | -0.53529400 | -2.79572400 |
| H | -4.20106300 | 0.52177800  | -2.61655000 |
| H | -4.21126400 | -0.73841800 | -3.85076100 |
| H | -4.67672600 | -1.13492300 | -2.19212600 |
| C | -1.63490800 | 0.08387000  | -3.36015200 |
| H | -0.56940700 | -0.12984200 | -3.22836600 |
| H | -1.87718100 | -0.05621100 | -4.41990600 |
| H | -1.80993800 | 1.13504700  | -3.11735300 |
| C | -4.17826600 | -2.34928000 | 0.35241000  |
| H | -4.31894400 | -2.81914300 | -0.62494500 |
| H | -4.45937600 | -3.09142000 | 1.10903100  |
| H | -4.86657500 | -1.51156900 | 0.43901100  |
| C | -1.82757500 | -3.20359500 | 0.41628000  |
| H | -0.77183300 | -2.98720000 | 0.60599400  |
| H | -2.15403500 | -3.95033300 | 1.14927600  |
| H | -1.91246000 | -3.65677000 | -0.57217400 |
| C | -2.49691200 | -1.40416000 | 2.00745200  |
| H | -1.44941400 | -1.13267800 | 2.17704800  |
| H | -3.12024800 | -0.53605700 | 2.21573100  |
| H | -2.76148100 | -2.18488700 | 2.73012500  |
| C | -2.54174500 | 1.22493600  | -0.24430500 |

|           |             |             |             |
|-----------|-------------|-------------|-------------|
| C         | -3.77759100 | 1.76046600  | 0.20571600  |
| C         | -1.49075500 | 2.12347300  | -0.52155900 |
| C         | -3.88615000 | 3.15934100  | 0.33354900  |
| C         | -1.62886300 | 3.50315400  | -0.39723100 |
| H         | -0.53023400 | 1.73380300  | -0.84206500 |
| C         | -2.84275400 | 4.02867700  | 0.03310800  |
| H         | -4.83252700 | 3.56120400  | 0.68154600  |
| H         | -0.78715100 | 4.14865500  | -0.62660300 |
| H         | -2.97947600 | 5.10019800  | 0.14207200  |
| C         | -5.02120400 | 1.02529800  | 0.61782900  |
| C         | -5.26803900 | 0.79609800  | 1.98177400  |
| C         | -6.03892600 | 0.72742900  | -0.30084100 |
| C         | -6.46528300 | 0.21866200  | 2.40710600  |
| H         | -4.52359900 | 1.09210300  | 2.71536800  |
| C         | -7.23852400 | 0.15149700  | 0.12348500  |
| H         | -5.90394900 | 0.96489700  | -1.34956300 |
| C         | -7.45053700 | -0.11634400 | 1.47670300  |
| H         | -6.63289100 | 0.04544100  | 3.46594600  |
| H         | -8.01278300 | -0.07294600 | -0.60414100 |
| H         | -8.38448400 | -0.56140100 | 1.80585700  |
| Au        | 0.41160500  | -0.72221300 | -0.51752800 |
| H         | 4.32173200  | -2.71037700 | -1.50247400 |
| <b>42</b> |             |             |             |
| C         | 2.21727500  | 1.08629700  | -1.05582900 |
| C         | 2.32799100  | 1.57655100  | -2.50649600 |
| H         | 1.78862200  | 2.52211600  | -2.59910700 |
| H         | 1.84038100  | 0.84119900  | -3.15782900 |
| C         | 3.02757500  | -0.07916900 | -0.67774300 |
| C         | 3.02279400  | -1.33543300 | -1.44605700 |
| C         | 1.84020200  | -1.88707100 | -1.97512300 |
| C         | 4.24979000  | -1.96845300 | -1.73392300 |
| C         | 1.88337100  | -3.03571400 | -2.76305300 |
| H         | 0.88428600  | -1.42752400 | -1.74114100 |
| C         | 4.28757100  | -3.10868400 | -2.53179000 |
| H         | 5.17238100  | -1.55545700 | -1.34118700 |
| C         | 3.10565800  | -3.64813200 | -3.04611600 |
| H         | 0.96074200  | -3.45525100 | -3.15221500 |
| H         | 5.24178700  | -3.57698200 | -2.75197800 |
| H         | 3.13756800  | -4.54231000 | -3.66090600 |
| C         | 3.87245300  | 0.25595000  | 0.38001900  |
| C         | 3.64349700  | 1.63742700  | 0.59553200  |
| O         | 2.74036900  | 2.15780400  | -0.19495200 |
| O         | 4.21212300  | 2.37303000  | 1.51183100  |
| C         | 3.90348500  | 3.79138600  | 1.55732900  |
| H         | 4.52558400  | 4.18648000  | 2.35742500  |
| H         | 4.15441200  | 4.25796800  | 0.60284900  |
| H         | 2.84568000  | 3.93655200  | 1.78345700  |

|   |             |             |             |
|---|-------------|-------------|-------------|
| C | 4.78338400  | -0.58002600 | 1.19072800  |
| C | 4.37094900  | -1.84564200 | 1.64082900  |
| C | 6.06373600  | -0.11921000 | 1.53893800  |
| C | 5.22065200  | -2.63118100 | 2.41656500  |
| H | 3.38194700  | -2.21159100 | 1.38268400  |
| C | 6.91084400  | -0.90872200 | 2.31596600  |
| H | 6.39901900  | 0.85497600  | 1.19805000  |
| C | 6.49299600  | -2.16557900 | 2.75634400  |
| H | 4.88773300  | -3.60594000 | 2.75996100  |
| H | 7.89915700  | -0.54126300 | 2.57459900  |
| H | 7.15381300  | -2.77823300 | 3.36178300  |
| O | 3.66596300  | 1.83017100  | -2.89374400 |
| P | -2.20677200 | 0.70367100  | 0.14860400  |
| C | -3.18744600 | 1.01701300  | -1.52920800 |
| C | -2.52194400 | 2.05744100  | 1.53859100  |
| C | -2.37652000 | 3.45713700  | 0.92189600  |
| H | -3.18993500 | 3.69638200  | 0.23297200  |
| H | -2.40790200 | 4.19779500  | 1.72928300  |
| H | -1.42358400 | 3.58048300  | 0.39738300  |
| C | -3.89669600 | 1.90074700  | 2.19792000  |
| H | -3.97181300 | 0.94716100  | 2.72526400  |
| H | -4.02441800 | 2.69742600  | 2.94031700  |
| H | -4.72073500 | 1.97353900  | 1.48584500  |
| C | -1.42968600 | 1.85513800  | 2.60432200  |
| H | -0.42642100 | 1.99828700  | 2.19044300  |
| H | -1.57624000 | 2.59397600  | 3.40069400  |
| H | -1.47832300 | 0.86287900  | 3.06065400  |
| C | -4.65740800 | 1.41611200  | -1.33795600 |
| H | -4.75260700 | 2.37781600  | -0.82654700 |
| H | -5.11367900 | 1.53223700  | -2.32804000 |
| H | -5.23433000 | 0.67251600  | -0.79264500 |
| C | -2.45921100 | 2.14417400  | -2.28968500 |
| H | -1.41579000 | 1.89017800  | -2.50044900 |
| H | -2.96802200 | 2.28497900  | -3.25023500 |
| H | -2.48209700 | 3.10005400  | -1.76429700 |
| C | -3.05658600 | -0.27649500 | -2.34959300 |
| H | -2.00729600 | -0.55035000 | -2.50216800 |
| H | -3.57225000 | -1.11596600 | -1.88590400 |
| H | -3.50442300 | -0.11290100 | -3.33656800 |
| C | -2.49317600 | -0.99170600 | 0.97861500  |
| C | -3.68069300 | -1.75358400 | 1.13701100  |
| C | -1.30219100 | -1.49591200 | 1.54224700  |
| C | -3.60065200 | -2.96550900 | 1.85159600  |
| C | -1.25413700 | -2.68997300 | 2.25584400  |
| H | -0.38114000 | -0.93581200 | 1.41560800  |
| C | -2.41816300 | -3.43549900 | 2.41248600  |
| H | -4.51142200 | -3.54537400 | 1.96325200  |
| H | -0.31239900 | -3.03058000 | 2.67492200  |

|                           |             |             |             |
|---------------------------|-------------|-------------|-------------|
| H                         | -2.41017900 | -4.37373400 | 2.95855500  |
| C                         | -5.05514400 | -1.46538000 | 0.60312800  |
| C                         | -5.49441200 | -2.11850300 | -0.56054500 |
| C                         | -5.98543800 | -0.70949900 | 1.33212000  |
| C                         | -6.80259800 | -1.96211300 | -1.02079500 |
| H                         | -4.81004800 | -2.76875800 | -1.09789700 |
| C                         | -7.29583400 | -0.55426100 | 0.87436500  |
| H                         | -5.69353500 | -0.25887500 | 2.27326800  |
| C                         | -7.70513200 | -1.16949800 | -0.30958300 |
| H                         | -7.11891300 | -2.47140900 | -1.92618900 |
| H                         | -8.00011800 | 0.03554100  | 1.45355300  |
| H                         | -8.72464700 | -1.05037900 | -0.66321200 |
| Au                        | 0.16123800  | 0.84383500  | -0.47017500 |
| H                         | 4.06831900  | 0.99551900  | -3.16796100 |
| <b>TS<sub>21-43</sub></b> |             |             |             |
| C                         | -4.87228600 | -1.20701800 | 0.91042600  |
| C                         | -4.86621800 | -1.32265200 | 2.31874300  |
| C                         | -4.36353600 | -2.42259400 | 2.94710000  |
| H                         | -4.03617900 | -3.29279400 | 2.38950500  |
| H                         | -4.32770600 | -2.48740200 | 4.02974400  |
| O                         | -1.88593300 | -1.76169000 | 1.87596500  |
| H                         | -1.99437500 | -1.20778600 | 2.67995600  |
| C                         | -5.49327100 | -0.17552300 | 0.13262900  |
| C                         | -6.05326800 | 0.99766900  | 0.70301400  |
| C                         | -5.57055600 | -0.33651600 | -1.27458300 |
| C                         | -6.66136200 | 1.95166800  | -0.09879800 |
| H                         | -6.01556200 | 1.14992900  | 1.77644700  |
| C                         | -6.18159700 | 0.62582800  | -2.07184700 |
| H                         | -5.16997700 | -1.23932400 | -1.72389600 |
| C                         | -6.72917200 | 1.77118100  | -1.48890800 |
| H                         | -7.09639500 | 2.83804500  | 0.35275100  |
| H                         | -6.24480500 | 0.47833800  | -3.14550400 |
| H                         | -7.21793400 | 2.51688300  | -2.10847500 |
| H                         | -4.50743700 | -2.06776900 | 0.35544500  |
| H                         | -5.22625000 | -0.49561400 | 2.92400100  |
| C                         | -2.08410100 | -0.89244100 | 0.84288800  |
| C                         | -2.01811700 | -1.45465600 | -0.51359500 |
| C                         | -1.75564400 | -2.84877100 | -0.66626300 |
| C                         | -2.26772800 | -0.69122000 | -1.69402600 |
| C                         | -1.73092600 | -3.43165200 | -1.92728000 |
| H                         | -1.58193700 | -3.44968200 | 0.21850400  |
| C                         | -2.22694400 | -1.30029500 | -2.94584600 |
| H                         | -2.49591300 | 0.36163200  | -1.60514600 |
| C                         | -1.96207700 | -2.66618800 | -3.07651800 |
| H                         | -1.53468400 | -4.49621400 | -2.01501200 |
| H                         | -2.41842300 | -0.69794800 | -3.82915100 |
| H                         | -1.94155700 | -3.13024300 | -4.05724100 |



|   |             |             |             |
|---|-------------|-------------|-------------|
| C | -2.38496600 | 0.46587900  | 1.32472400  |
| O | -2.40939800 | 0.67944300  | 2.53918400  |
| O | -2.58466300 | 1.41230700  | 0.38979700  |
| C | -2.78478800 | 2.76538900  | 0.88784900  |
| H | -1.89933600 | 3.05639000  | 1.46097000  |
| H | -3.63970500 | 2.76277700  | 1.56765100  |
| C | -3.01234000 | 3.66239300  | -0.31172900 |
| H | -2.15115200 | 3.64766400  | -0.98651200 |
| H | -3.16268100 | 4.69230400  | 0.02580500  |
| H | -3.89964200 | 3.35035500  | -0.86882800 |
| P | 2.54366400  | 0.04723400  | -0.11142600 |
| C | 2.72025900  | 1.16466200  | -1.66155000 |
| C | 4.15094100  | 1.39910300  | -2.18110900 |
| C | 1.95204500  | 2.48860000  | -1.49079300 |
| H | 2.18690400  | 0.56289500  | -2.41068200 |
| C | 4.11753600  | 2.20237600  | -3.49591600 |
| H | 4.73843700  | 1.94878100  | -1.43747600 |
| H | 4.65947100  | 0.44569700  | -2.35484500 |
| C | 1.93716200  | 3.28620500  | -2.80681200 |
| H | 2.42961900  | 3.09374500  | -0.70968400 |
| H | 0.92614800  | 2.28913900  | -1.15859700 |
| C | 3.35646200  | 3.52528200  | -3.34005000 |
| H | 5.14390300  | 2.38578400  | -3.83200600 |
| H | 3.63802700  | 1.59507100  | -4.27593900 |
| H | 1.41928600  | 4.23892300  | -2.64966200 |
| H | 1.35422100  | 2.73207800  | -3.55559900 |
| H | 3.31643300  | 4.05296700  | -4.29898800 |
| H | 3.90120400  | 4.18041000  | -2.64605100 |
| C | 3.56408000  | -1.54805000 | -0.41650200 |
| C | 2.95199100  | -2.75158600 | 0.32886400  |
| C | 5.06660600  | -1.42142200 | -0.09395400 |
| H | 3.44486700  | -1.71351600 | -1.49631700 |
| C | 3.70544400  | -4.05181000 | -0.00257900 |
| H | 2.99585300  | -2.57072200 | 1.41230900  |
| H | 1.89256300  | -2.85728500 | 0.07059600  |
| C | 5.81179300  | -2.72385200 | -0.44231400 |
| H | 5.19240200  | -1.21979200 | 0.97767500  |
| H | 5.51879200  | -0.58363400 | -0.63198100 |
| C | 5.20816000  | -3.93253100 | 0.28345400  |
| H | 3.26926200  | -4.87891200 | 0.56835900  |
| H | 3.55387700  | -4.29072800 | -1.06439300 |
| H | 6.87135200  | -2.61106700 | -0.18772000 |
| H | 5.76737900  | -2.88592500 | -1.52803700 |
| H | 5.72446800  | -4.85099100 | -0.01557700 |
| H | 5.36602100  | -3.82360000 | 1.36542300  |
| C | 3.15369300  | 0.86135300  | 1.51583900  |
| C | 2.02947400  | 1.63695100  | 2.23120800  |
| C | 4.41851300  | 1.73288300  | 1.37914400  |

|           |             |             |             |
|-----------|-------------|-------------|-------------|
| H         | 3.39930600  | -0.01518100 | 2.13192000  |
| C         | 2.50198400  | 2.14063800  | 3.60610900  |
| H         | 1.72374400  | 2.49300900  | 1.61499000  |
| H         | 1.14576700  | 1.00019200  | 2.34796400  |
| C         | 4.88480500  | 2.23106800  | 2.76056400  |
| H         | 4.19528600  | 2.60012300  | 0.74545600  |
| H         | 5.22841100  | 1.18197600  | 0.89378000  |
| C         | 3.77412300  | 2.99188700  | 3.49557500  |
| H         | 1.69584700  | 2.71131800  | 4.08006600  |
| H         | 2.69593200  | 1.27632700  | 4.25644300  |
| H         | 5.76893800  | 2.86565300  | 2.63462300  |
| H         | 5.20258300  | 1.37045900  | 3.36513400  |
| H         | 4.11661100  | 3.29234100  | 4.49157900  |
| H         | 3.54637000  | 3.91892200  | 2.95107700  |
| Au        | 0.22405500  | -0.50514500 | 0.05233000  |
| <b>43</b> |             |             |             |
| C         | -4.30770000 | 0.92195900  | 1.12221500  |
| C         | -4.68673400 | 2.38453800  | 1.05636700  |
| C         | -4.69786500 | 3.20046500  | 2.11049600  |
| H         | -4.43095300 | 2.85379500  | 3.10550700  |
| H         | -4.98912000 | 4.24229700  | 2.01772800  |
| O         | -1.97217100 | 1.44273100  | 1.51350700  |
| H         | -1.85018900 | 2.32446700  | 1.12014000  |
| C         | -5.36729500 | 0.00648000  | 0.52275100  |
| C         | -6.01273300 | 0.27934100  | -0.69311300 |
| C         | -5.75866300 | -1.13705100 | 1.23562100  |
| C         | -7.00221100 | -0.57266900 | -1.18545900 |
| H         | -5.75533200 | 1.16620700  | -1.26197700 |
| C         | -6.74772300 | -1.99131700 | 0.74692600  |
| H         | -5.29198400 | -1.35399500 | 2.19342100  |
| C         | -7.37163100 | -1.71296700 | -0.46946800 |
| H         | -7.49533600 | -0.33735200 | -2.12424900 |
| H         | -7.03771900 | -2.86550000 | 1.32233400  |
| H         | -8.14783600 | -2.36984700 | -0.85010400 |
| H         | -4.20650600 | 0.65625500  | 2.17975500  |
| H         | -4.96999700 | 2.77907900  | 0.08202800  |
| C         | -2.79398400 | 0.72679300  | 0.61114900  |
| C         | -2.36642300 | -0.74021400 | 0.67522700  |
| C         | -1.56922500 | -1.15687300 | 1.78449200  |
| C         | -2.78771400 | -1.71403700 | -0.24035000 |
| C         | -1.21346300 | -2.52225300 | 1.93529900  |
| H         | -1.43345800 | -0.47053000 | 2.61592300  |
| C         | -2.42007700 | -3.05331200 | -0.07738700 |
| H         | -3.41444500 | -1.43101900 | -1.07434000 |
| C         | -1.62617400 | -3.46557400 | 0.99457300  |
| H         | -0.65424000 | -2.82775400 | 2.81431900  |
| H         | -2.76907700 | -3.78511400 | -0.79983100 |

|   |             |             |             |
|---|-------------|-------------|-------------|
| H | -1.35581700 | -4.50994300 | 1.11080500  |
| C | -2.57623800 | 1.38714000  | -0.77171200 |
| O | -1.99061000 | 2.45749000  | -0.86052000 |
| O | -3.10374300 | 0.73270000  | -1.80387400 |
| C | -2.97666100 | 1.36742700  | -3.11499700 |
| H | -1.91356600 | 1.52593400  | -3.31501500 |
| H | -3.45908100 | 2.34722800  | -3.06429100 |
| C | -3.62807700 | 0.45094200  | -4.12974800 |
| H | -3.11968000 | -0.51641600 | -4.17334500 |
| H | -3.57421300 | 0.90978600  | -5.12134600 |
| H | -4.68014200 | 0.27980600  | -3.88735900 |
| P | 2.63697200  | 0.12481100  | 0.12059700  |
| C | 3.89524500  | -1.17950900 | 0.75284200  |
| C | 5.38073400  | -0.77388100 | 0.71727200  |
| C | 3.66341600  | -2.55454100 | 0.09776700  |
| H | 3.59739500  | -1.25707100 | 1.80805700  |
| C | 6.24747300  | -1.86322700 | 1.37880600  |
| H | 5.70986400  | -0.63081800 | -0.31791700 |
| H | 5.53390200  | 0.17616000  | 1.23863900  |
| C | 4.54540500  | -3.63003600 | 0.75699300  |
| H | 3.90493300  | -2.49946800 | -0.97142000 |
| H | 2.60635700  | -2.83668300 | 0.17200500  |
| C | 6.02906200  | -3.23792700 | 0.73343400  |
| H | 7.30153500  | -1.57155700 | 1.31683300  |
| H | 6.00146300  | -1.91824600 | 2.44826200  |
| H | 4.39161900  | -4.58834900 | 0.24876400  |
| H | 4.22139300  | -3.77208200 | 1.79744000  |
| H | 6.62852500  | -3.99626800 | 1.24825100  |
| H | 6.38322800  | -3.21349000 | -0.30652300 |
| C | 3.05330000  | 1.79519000  | 0.96888800  |
| C | 1.78411800  | 2.64822600  | 1.16850300  |
| C | 4.15298700  | 2.61637000  | 0.26598300  |
| H | 3.42097700  | 1.48628300  | 1.95724900  |
| C | 2.09862700  | 3.93778600  | 1.94637200  |
| H | 1.35844100  | 2.90685100  | 0.18852700  |
| H | 1.01845500  | 2.06996700  | 1.69758900  |
| C | 4.46730500  | 3.89797700  | 1.06015100  |
| H | 3.81087700  | 2.89842000  | -0.73819500 |
| H | 5.06632400  | 2.02870800  | 0.13912000  |
| C | 3.21267100  | 4.75328900  | 1.27667300  |
| H | 1.18617800  | 4.53708700  | 2.03916700  |
| H | 2.40343600  | 3.67319400  | 2.96839100  |
| H | 5.23676800  | 4.46998000  | 0.53010700  |
| H | 4.89816000  | 3.62304500  | 2.03271700  |
| H | 3.45446000  | 5.63327900  | 1.88229500  |
| H | 2.85696700  | 5.12935600  | 0.30738400  |
| C | 2.67364100  | 0.38593500  | -1.78049900 |
| C | 1.68409700  | -0.54369900 | -2.51113500 |

|                           |             |             |             |
|---------------------------|-------------|-------------|-------------|
| C                         | 4.07400200  | 0.30666000  | -2.42081600 |
| H                         | 2.30320000  | 1.41591100  | -1.87846000 |
| C                         | 1.62663700  | -0.21126700 | -4.01267900 |
| H                         | 1.99455600  | -1.58844400 | -2.37979600 |
| H                         | 0.68595600  | -0.45498700 | -2.06750000 |
| C                         | 4.00518900  | 0.64686100  | -3.92141900 |
| H                         | 4.46836200  | -0.71043700 | -2.30658900 |
| H                         | 4.77537200  | 0.97973800  | -1.92087400 |
| C                         | 3.01588600  | -0.26112700 | -4.66273700 |
| H                         | 0.94323300  | -0.90630900 | -4.51347400 |
| H                         | 1.20185000  | 0.79460900  | -4.14033200 |
| H                         | 5.00666100  | 0.56108200  | -4.35705500 |
| H                         | 3.70236800  | 1.69630400  | -4.04090200 |
| H                         | 2.95095400  | 0.02987200  | -5.71665000 |
| H                         | 3.38806000  | -1.29492000 | -4.64695800 |
| Au                        | 0.46733200  | -0.59208900 | 0.85096400  |
| <b>TS<sub>20-44</sub></b> |             |             |             |
| C                         | -2.40592300 | -0.62469300 | 0.09316000  |
| C                         | -2.97910400 | -1.86613600 | -0.45131300 |
| C                         | -4.04128600 | -2.55859700 | 0.18127500  |
| C                         | -2.43844300 | -2.42830500 | -1.63460500 |
| C                         | -4.50710200 | -3.76855800 | -0.32261800 |
| H                         | -4.50105200 | -2.14554000 | 1.07201400  |
| C                         | -2.91938400 | -3.62598600 | -2.14719200 |
| H                         | -1.62355800 | -1.90980000 | -2.13142700 |
| C                         | -3.95181800 | -4.30428000 | -1.48816100 |
| H                         | -5.30945500 | -4.29166200 | 0.18791700  |
| H                         | -2.48724600 | -4.04108200 | -3.05236500 |
| H                         | -4.32237700 | -5.24513300 | -1.88344200 |
| C                         | -2.79483100 | -0.35783400 | 1.53107900  |
| O                         | -2.04951000 | -0.70901300 | 2.42722000  |
| O                         | -3.99182000 | 0.21875500  | 1.73861900  |
| C                         | -4.39229500 | 0.42150700  | 3.13261000  |
| H                         | -5.48290700 | 0.39827900  | 3.09666600  |
| H                         | -4.02535700 | -0.42099600 | 3.72117400  |
| C                         | -3.19595500 | 1.99159100  | -0.49511200 |
| C                         | -3.42817700 | 0.81797400  | -1.19584300 |
| C                         | -4.87146600 | 0.34848600  | -1.34421600 |
| H                         | -4.90424400 | -0.70170900 | -1.65250900 |
| H                         | -5.38671500 | 0.43636500  | -0.38520700 |
| O                         | -5.57266600 | 1.17979000  | -2.25999000 |
| H                         | -5.36457900 | 0.89701300  | -3.15972800 |
| C                         | -2.09056400 | 2.90321300  | -0.61572100 |
| C                         | -1.98810700 | 3.96323800  | 0.31675900  |
| C                         | -1.12730400 | 2.81765700  | -1.64948600 |
| C                         | -0.96155500 | 4.89548900  | 0.22793500  |
| H                         | -2.73030200 | 4.04544100  | 1.10577300  |

|   |             |             |             |
|---|-------------|-------------|-------------|
| C | -0.10679200 | 3.75529800  | -1.73852300 |
| H | -1.20163100 | 2.03457100  | -2.39559600 |
| C | -0.02018900 | 4.79395200  | -0.80177500 |
| H | -0.89862500 | 5.70646700  | 0.94619100  |
| H | 0.61399500  | 3.69501000  | -2.54796500 |
| H | 0.77141800  | 5.53255600  | -0.88549300 |
| C | -3.87397700 | 1.74303700  | 3.67283400  |
| H | -4.24024100 | 2.58554000  | 3.07820300  |
| H | -4.22855200 | 1.87921700  | 4.69934300  |
| H | -2.78124500 | 1.75753900  | 3.68740500  |
| P | 2.09959200  | -0.36872500 | -0.10467900 |
| C | 2.55464000  | -1.97861700 | 0.84136600  |
| C | 4.01721800  | -2.45118800 | 0.76016000  |
| C | 2.04878300  | -1.94641400 | 2.29771300  |
| H | 1.94045800  | -2.71052200 | 0.29722000  |
| C | 4.17408600  | -3.82861600 | 1.43258700  |
| H | 4.67694300  | -1.73170600 | 1.25817700  |
| H | 4.34460300  | -2.52071000 | -0.28222400 |
| C | 2.22057100  | -3.32390600 | 2.96236100  |
| H | 2.61800300  | -1.20196400 | 2.86964300  |
| H | 0.99670600  | -1.64102200 | 2.33296800  |
| C | 3.67202600  | -3.81715500 | 2.88274400  |
| H | 5.22539800  | -4.13458900 | 1.39127000  |
| H | 3.60921100  | -4.57528800 | 0.85719100  |
| H | 1.88921100  | -3.26854400 | 4.00520400  |
| H | 1.56053100  | -4.04704000 | 2.46336500  |
| H | 3.75711500  | -4.81791000 | 3.32016200  |
| H | 4.31378500  | -3.15842600 | 3.48454600  |
| C | 2.87331100  | -0.53170200 | -1.85451500 |
| C | 2.02579000  | 0.21028400  | -2.90706900 |
| C | 4.35120200  | -0.10918100 | -1.95977500 |
| H | 2.80129500  | -1.60951700 | -2.05768000 |
| C | 2.57381800  | -0.01232500 | -4.32788100 |
| H | 2.02888500  | 1.28618700  | -2.67913000 |
| H | 0.98230800  | -0.11921900 | -2.84787100 |
| C | 4.89507900  | -0.34516100 | -3.38117800 |
| H | 4.44212600  | 0.95828700  | -1.71936400 |
| H | 4.96693400  | -0.65012000 | -1.23643700 |
| C | 4.05293000  | 0.38071100  | -4.43769500 |
| H | 1.97109600  | 0.55410000  | -5.04724300 |
| H | 2.45869300  | -1.07281300 | -4.59215300 |
| H | 5.93907400  | -0.01637700 | -3.42943500 |
| H | 4.89820900  | -1.42341500 | -3.59216400 |
| H | 4.42975500  | 0.15949000  | -5.44211600 |
| H | 4.15262500  | 1.46644400  | -4.29920200 |
| C | 2.81510400  | 1.21393700  | 0.71239500  |
| C | 1.81955600  | 1.82931400  | 1.71773900  |
| C | 4.21165300  | 1.06990200  | 1.34900000  |

|           |             |             |             |
|-----------|-------------|-------------|-------------|
| H         | 2.89498200  | 1.90202600  | -0.14114400 |
| C         | 2.33377200  | 3.18014600  | 2.24492700  |
| H         | 1.67463600  | 1.13955400  | 2.55899000  |
| H         | 0.83900200  | 1.95998200  | 1.24735100  |
| C         | 4.71987000  | 2.43046800  | 1.86044800  |
| H         | 4.15501100  | 0.37291200  | 2.19356400  |
| H         | 4.92819600  | 0.65086200  | 0.63830800  |
| C         | 3.73748500  | 3.06359000  | 2.85423900  |
| H         | 1.62715700  | 3.57664100  | 2.98308100  |
| H         | 2.35577200  | 3.90105500  | 1.41526800  |
| H         | 5.70465600  | 2.30067000  | 2.32280700  |
| H         | 4.86350100  | 3.10620800  | 1.00564200  |
| H         | 4.09781800  | 4.04943200  | 3.16830600  |
| H         | 3.69022400  | 2.44565800  | 3.76160400  |
| Au        | -0.33696000 | -0.35285000 | -0.14587200 |
| H         | -2.77425500 | 0.58699500  | -2.03280400 |
| H         | -3.93482300 | 2.25352200  | 0.25872000  |
| <b>44</b> |             |             |             |
| C         | 2.54838500  | -1.03560800 | 0.18962900  |
| C         | 2.34722000  | -1.58695900 | 1.57280000  |
| C         | 2.25198600  | -2.97211000 | 1.82800900  |
| C         | 2.29432500  | -0.71585600 | 2.68730300  |
| C         | 2.13875200  | -3.45282100 | 3.13251300  |
| H         | 2.27759600  | -3.67391200 | 1.00722000  |
| C         | 2.16269400  | -1.20081600 | 3.98363800  |
| H         | 2.33170100  | 0.35922900  | 2.54291500  |
| C         | 2.08971000  | -2.57722200 | 4.21639500  |
| H         | 2.09165500  | -4.52514700 | 3.29641800  |
| H         | 2.12019100  | -0.50283300 | 4.81436000  |
| H         | 1.99738900  | -2.95825300 | 5.22862500  |
| C         | 2.40537100  | -1.99585700 | -0.97749400 |
| O         | 1.70035200  | -2.98970200 | -0.97566500 |
| O         | 3.13547100  | -1.61693200 | -2.04542600 |
| C         | 3.07391500  | -2.46759000 | -3.23001700 |
| H         | 4.04252100  | -2.31700800 | -3.71018500 |
| H         | 2.98397100  | -3.50476400 | -2.90379600 |
| C         | 2.54581900  | 1.05202200  | -0.75084700 |
| C         | 3.49358000  | 0.16945600  | 0.03074600  |
| C         | 4.91404000  | 0.00281400  | -0.54723100 |
| H         | 5.38916200  | -0.88216000 | -0.09694500 |
| H         | 4.87815800  | -0.15411700 | -1.62434100 |
| O         | 5.67246200  | 1.18375600  | -0.33788900 |
| H         | 6.03424300  | 1.16960400  | 0.55714600  |
| C         | 2.26225900  | 2.45745000  | -0.46517800 |
| C         | 1.58327600  | 3.21994900  | -1.44620000 |
| C         | 2.67189000  | 3.10653100  | 0.72063100  |
| C         | 1.33641800  | 4.57416500  | -1.25482100 |

|   |             |             |             |
|---|-------------|-------------|-------------|
| H | 1.27459400  | 2.73724400  | -2.36961000 |
| C | 2.41655400  | 4.45978600  | 0.91078200  |
| H | 3.21361300  | 2.55814300  | 1.48310300  |
| C | 1.74839800  | 5.19822600  | -0.07270000 |
| H | 0.83301700  | 5.14734300  | -2.02706200 |
| H | 2.75145800  | 4.94793500  | 1.82067900  |
| H | 1.56168300  | 6.25710000  | 0.07704200  |
| C | 1.92702500  | -2.06668800 | -4.14215600 |
| H | 2.01238000  | -1.01898900 | -4.44621100 |
| H | 1.95048800  | -2.68327700 | -5.04627200 |
| H | 0.96328100  | -2.22281400 | -3.65068800 |
| P | -1.87601100 | 0.08764000  | 0.13117400  |
| C | -2.34025200 | -1.57853800 | 0.97599900  |
| C | -3.77127500 | -1.68030100 | 1.53720200  |
| C | -1.98586200 | -2.78839700 | 0.09033300  |
| H | -1.64639700 | -1.57558200 | 1.82860700  |
| C | -3.95611700 | -3.00669300 | 2.29996300  |
| H | -4.50184600 | -1.62997800 | 0.72219000  |
| H | -3.98326600 | -0.84425800 | 2.21148300  |
| C | -2.18957600 | -4.10568000 | 0.86016000  |
| H | -2.62643400 | -2.79322200 | -0.80143100 |
| H | -0.94892100 | -2.72467900 | -0.25714500 |
| C | -3.61034400 | -4.22047600 | 1.42785500  |
| H | -4.98801700 | -3.07276400 | 2.66221900  |
| H | -3.31278300 | -3.00186100 | 3.19088000  |
| H | -1.96922000 | -4.94921400 | 0.19684400  |
| H | -1.46032500 | -4.15535100 | 1.68069900  |
| H | -3.71380800 | -5.14375800 | 2.00817600  |
| H | -4.32926300 | -4.29121000 | 0.59952400  |
| C | -2.41718000 | 1.48244100  | 1.33633700  |
| C | -1.46069300 | 2.68755200  | 1.25234900  |
| C | -3.88129400 | 1.94086500  | 1.18648600  |
| H | -2.29524200 | 1.01466200  | 2.32331900  |
| C | -1.82118200 | 3.76350300  | 2.29115700  |
| H | -1.51020600 | 3.12343100  | 0.24469500  |
| H | -0.42582900 | 2.35999700  | 1.40006300  |
| C | -4.23323200 | 3.01046400  | 2.23787800  |
| H | -4.02927700 | 2.36699700  | 0.18566200  |
| H | -4.56988700 | 1.09633900  | 1.27836600  |
| C | -3.28288500 | 4.21217100  | 2.16621400  |
| H | -1.14368900 | 4.61709600  | 2.17806600  |
| H | -1.64950700 | 3.35906100  | 3.29857500  |
| H | -5.27094700 | 3.33056600  | 2.09350300  |
| H | -4.18179700 | 2.56186300  | 3.23945600  |
| H | -3.52638100 | 4.93512600  | 2.95220000  |
| H | -3.42476600 | 4.73250300  | 1.20862500  |
| C | -2.74648700 | 0.35552600  | -1.56118600 |
| C | -1.90640400 | -0.21114000 | -2.72442900 |

|                     |             |             |             |
|---------------------|-------------|-------------|-------------|
| C                   | -4.20131100 | -0.14461800 | -1.64728000 |
| H                   | -2.75010300 | 1.45119900  | -1.65029600 |
| C                   | -2.53534800 | 0.14166500  | -4.08406200 |
| H                   | -1.83502600 | -1.30239400 | -2.62733100 |
| H                   | -0.88158000 | 0.17546100  | -2.67491000 |
| C                   | -4.82376300 | 0.21846500  | -3.00870900 |
| H                   | -4.21697300 | -1.23465700 | -1.52877800 |
| H                   | -4.80873500 | 0.27285500  | -0.84063300 |
| C                   | -3.99317400 | -0.32786000 | -4.17684500 |
| H                   | -1.93699800 | -0.30102000 | -4.88827600 |
| H                   | -2.49369300 | 1.23077400  | -4.22651400 |
| H                   | -5.84815600 | -0.16744000 | -3.05173200 |
| H                   | -4.89925900 | 1.31159400  | -3.09128400 |
| H                   | -4.43042800 | -0.01648800 | -5.13153600 |
| H                   | -4.02342600 | -1.42617500 | -4.16298400 |
| Au                  | 0.58905300  | 0.03988400  | -0.13813800 |
| H                   | 3.63616100  | 0.58316300  | 1.02936200  |
| H                   | 2.49621000  | 0.78464900  | -1.80625000 |
| TS <sub>44-45</sub> |             |             |             |
| C                   | 2.65474900  | -0.90256200 | 0.14621300  |
| C                   | 2.75557500  | -0.71676500 | 1.64918200  |
| C                   | 3.51414900  | -1.66316500 | 2.36050000  |
| C                   | 2.22147500  | 0.37153900  | 2.35133900  |
| C                   | 3.71235500  | -1.52952300 | 3.73310300  |
| H                   | 3.93506000  | -2.51864000 | 1.84309800  |
| C                   | 2.42880100  | 0.50902400  | 3.72712200  |
| H                   | 1.64576000  | 1.12818000  | 1.82752500  |
| C                   | 3.17134300  | -0.44234400 | 4.42331600  |
| H                   | 4.29217800  | -2.27866200 | 4.26355000  |
| H                   | 2.00684900  | 1.36284000  | 4.24902800  |
| H                   | 3.32977400  | -0.33905400 | 5.49223300  |
| C                   | 2.13758200  | -2.25910400 | -0.30874900 |
| O                   | 1.72916000  | -3.10467000 | 0.46037400  |
| O                   | 2.21497500  | -2.42953500 | -1.64599100 |
| C                   | 1.89796500  | -3.75611900 | -2.16898800 |
| H                   | 2.58915300  | -3.88433000 | -3.00466700 |
| H                   | 2.11952200  | -4.49080500 | -1.39357400 |
| C                   | 2.70016300  | 0.51513900  | -1.17946800 |
| C                   | 3.81986200  | -0.27608500 | -0.62256400 |
| C                   | 4.74761900  | -1.02772400 | -1.58829300 |
| H                   | 5.28634900  | -1.81582100 | -1.04054700 |
| H                   | 4.17604600  | -1.50346100 | -2.38315300 |
| O                   | 5.62752800  | -0.11902900 | -2.22324300 |
| H                   | 6.29984000  | 0.16572500  | -1.59054100 |
| C                   | 2.55069100  | 1.98221900  | -1.04158700 |
| C                   | 1.80716000  | 2.65948200  | -2.02980300 |
| C                   | 3.19149500  | 2.73842700  | -0.04327000 |

|   |             |             |             |
|---|-------------|-------------|-------------|
| C | 1.71541300  | 4.04939200  | -2.02453900 |
| H | 1.32699400  | 2.09056800  | -2.82141900 |
| C | 3.08280400  | 4.12666300  | -0.03243000 |
| H | 3.77023900  | 2.24697800  | 0.73122900  |
| C | 2.34719700  | 4.78735900  | -1.02130100 |
| H | 1.15809100  | 4.55515000  | -2.80686300 |
| H | 3.58491400  | 4.69700300  | 0.74289800  |
| H | 2.27830700  | 5.87069300  | -1.01545500 |
| C | 0.45201100  | -3.84319000 | -2.62168300 |
| H | 0.23112800  | -3.09400200 | -3.38729700 |
| H | 0.26549300  | -4.83344100 | -3.04935900 |
| H | -0.22813400 | -3.70405000 | -1.77761000 |
| P | -1.92207900 | 0.18469700  | 0.17714800  |
| C | -2.27643800 | -1.18152100 | 1.48357900  |
| C | -3.62391300 | -1.08210500 | 2.22296300  |
| C | -2.03797100 | -2.59205100 | 0.91116800  |
| H | -1.47834100 | -0.98106700 | 2.21190000  |
| C | -3.71327800 | -2.15884200 | 3.32179100  |
| H | -4.45376000 | -1.21660100 | 1.52007800  |
| H | -3.74129100 | -0.09275800 | 2.67606100  |
| C | -2.14699200 | -3.65624800 | 2.01740900  |
| H | -2.78199600 | -2.80552500 | 0.13272000  |
| H | -1.04858300 | -2.65165000 | 0.44475100  |
| C | -3.48671200 | -3.56838300 | 2.76018100  |
| H | -4.69041500 | -2.09077500 | 3.81252900  |
| H | -2.96071900 | -1.94842300 | 4.09417100  |
| H | -2.01332700 | -4.65034800 | 1.57709100  |
| H | -1.32140500 | -3.51774700 | 2.72836000  |
| H | -3.52120200 | -4.30655500 | 3.56859300  |
| H | -4.30453400 | -3.82191300 | 2.07099500  |
| C | -2.32346100 | 1.87779300  | 0.98981400  |
| C | -1.44080300 | 2.99843500  | 0.40585100  |
| C | -3.81067000 | 2.28235900  | 0.93747000  |
| H | -2.03711400 | 1.72114500  | 2.03924800  |
| C | -1.68202800 | 4.33606900  | 1.12650800  |
| H | -1.66445900 | 3.11651000  | -0.66396700 |
| H | -0.38256400 | 2.72589100  | 0.47407000  |
| C | -4.04112000 | 3.61439500  | 1.67589100  |
| H | -4.11882700 | 2.40171200  | -0.10923800 |
| H | -4.44772000 | 1.50702700  | 1.37123700  |
| C | -3.16268900 | 4.73658200  | 1.10925100  |
| H | -1.06518200 | 5.11288300  | 0.66135700  |
| H | -1.34025900 | 4.24789200  | 2.16728600  |
| H | -5.10081200 | 3.88400200  | 1.60930900  |
| H | -3.82065100 | 3.47790500  | 2.74351800  |
| H | -3.31267700 | 5.65994900  | 1.67885700  |
| H | -3.47021400 | 4.95320000  | 0.07663900  |
| C | -2.97677500 | 0.02753700  | -1.42005000 |

|           |             |             |             |
|-----------|-------------|-------------|-------------|
| C         | -2.27348900 | -0.82491200 | -2.49419700 |
| C         | -4.42406400 | -0.45629800 | -1.20007800 |
| H         | -3.00790600 | 1.06495700  | -1.78182000 |
| C         | -3.06669100 | -0.81208100 | -3.81281200 |
| H         | -2.17682000 | -1.85781000 | -2.13659400 |
| H         | -1.25604100 | -0.45437300 | -2.66336700 |
| C         | -5.21103300 | -0.44014100 | -2.52431000 |
| H         | -4.40836600 | -1.48004800 | -0.80746800 |
| H         | -4.93780100 | 0.16153600  | -0.45941600 |
| C         | -4.51623900 | -1.27252900 | -3.60920200 |
| H         | -2.56099000 | -1.44712100 | -4.54890000 |
| H         | -3.06190000 | 0.20690700  | -4.22444200 |
| H         | -6.22566100 | -0.81199200 | -2.34458400 |
| H         | -5.31632800 | 0.59784100  | -2.86883800 |
| H         | -5.07027000 | -1.20558100 | -4.55154300 |
| H         | -4.52408100 | -2.33174300 | -3.31693100 |
| Au        | 0.44192700  | 0.02952600  | -0.26677100 |
| H         | 4.42450900  | 0.30159200  | 0.07746800  |
| H         | 2.31152400  | 0.09474700  | -2.10562100 |
| <b>45</b> |             |             |             |
| C         | 3.38020600  | 0.61077300  | -0.56297100 |
| C         | 2.64549400  | -0.57779100 | -1.12308000 |
| C         | 2.62453800  | -0.84069500 | -2.48963300 |
| C         | 1.96551200  | -1.47363200 | -0.25252800 |
| C         | 1.96148000  | -1.96607300 | -3.00935600 |
| H         | 3.14195200  | -0.16899100 | -3.16793700 |
| C         | 1.30858200  | -2.61465800 | -0.77454600 |
| H         | 2.11728000  | -1.38466600 | 0.81946900  |
| C         | 1.30578400  | -2.85176000 | -2.16604200 |
| H         | 1.97624700  | -2.14695500 | -4.07980500 |
| H         | 0.92027000  | -3.36815300 | -0.09570700 |
| H         | 0.81878900  | -3.73712500 | -2.56142600 |
| C         | 2.45874400  | 1.74502000  | -0.20816000 |
| O         | 1.25086300  | 1.71599000  | -0.39756900 |
| O         | 3.07675600  | 2.78623300  | 0.36744900  |
| C         | 2.24617000  | 3.91878400  | 0.74913400  |
| H         | 1.75771200  | 4.30530100  | -0.15000900 |
| H         | 1.46768700  | 3.55985400  | 1.42845800  |
| C         | 4.62160300  | 0.38083300  | 0.36475300  |
| C         | 4.82315900  | 0.83194200  | -1.04067600 |
| C         | 5.45445200  | 2.17403500  | -1.38328700 |
| H         | 5.16132300  | 2.46877300  | -2.40339300 |
| H         | 5.10231700  | 2.94788400  | -0.70301900 |
| O         | 6.86296300  | 2.12898000  | -1.23269100 |
| H         | 7.23516300  | 1.57934500  | -1.93428500 |
| C         | 4.97838500  | -0.96513800 | 0.90809900  |
| C         | 4.86492600  | -1.17148500 | 2.29304000  |

|   |             |             |             |
|---|-------------|-------------|-------------|
| C | 5.42135600  | -2.03043000 | 0.11065100  |
| C | 5.17583800  | -2.40537700 | 2.86365000  |
| H | 4.54272500  | -0.35041500 | 2.92907100  |
| C | 5.73158100  | -3.26631600 | 0.67971100  |
| H | 5.53993700  | -1.90060700 | -0.96063600 |
| C | 5.60799500  | -3.45981000 | 2.05673500  |
| H | 5.09033200  | -2.53967000 | 3.93788700  |
| H | 6.08151300  | -4.07591800 | 0.04603800  |
| H | 5.85730000  | -4.41984500 | 2.49818500  |
| C | 3.14771100  | 4.94704000  | 1.40219200  |
| H | 3.91789900  | 5.29664600  | 0.70935200  |
| H | 2.55106200  | 5.81026300  | 1.71187700  |
| H | 3.63828200  | 4.53474600  | 2.28813600  |
| P | -2.62558900 | -0.08802500 | -0.01985800 |
| C | -2.96528800 | 1.21946400  | -1.38458900 |
| C | -4.44323400 | 1.57897200  | -1.62582300 |
| C | -2.09463600 | 2.47789400  | -1.20913800 |
| H | -2.60272900 | 0.68413100  | -2.27374500 |
| C | -4.57307300 | 2.51448200  | -2.84383800 |
| H | -4.85855700 | 2.07668400  | -0.74231600 |
| H | -5.04123500 | 0.67888600  | -1.80066100 |
| C | -2.23862700 | 3.40316600  | -2.43105600 |
| H | -2.41470300 | 3.02379500  | -0.31194800 |
| H | -1.04501700 | 2.20707000  | -1.06163700 |
| C | -3.70453100 | 3.77093400  | -2.69829700 |
| H | -5.62565400 | 2.78708000  | -2.97811300 |
| H | -4.27560800 | 1.96737700  | -3.74921600 |
| H | -1.63776600 | 4.30624000  | -2.27591600 |
| H | -1.82086500 | 2.89861600  | -3.31353700 |
| H | -3.78314800 | 4.38945900  | -3.59894400 |
| H | -4.08364400 | 4.38169400  | -1.86696500 |
| C | -3.83898400 | -1.54605400 | -0.32787600 |
| C | -3.21640200 | -2.89550900 | 0.08204900  |
| C | -5.22704800 | -1.37219300 | 0.32106900  |
| H | -3.95623900 | -1.54031300 | -1.42037300 |
| C | -4.14800200 | -4.06918600 | -0.26674500 |
| H | -3.02096700 | -2.89406200 | 1.16409300  |
| H | -2.24766700 | -3.02644500 | -0.41244100 |
| C | -6.15416700 | -2.54826300 | -0.04035200 |
| H | -5.11594700 | -1.33341200 | 1.41245300  |
| H | -5.69070800 | -0.43085800 | 0.01372800  |
| C | -5.53992200 | -3.89734500 | 0.35416200  |
| H | -3.69115800 | -5.00774400 | 0.06631900  |
| H | -4.24216100 | -4.13749300 | -1.35946800 |
| H | -7.12287800 | -2.40701200 | 0.45137700  |
| H | -6.34861200 | -2.53501800 | -1.12161600 |
| H | -6.19654100 | -4.71752600 | 0.04483300  |
| H | -5.46129000 | -3.95609000 | 1.44864200  |

|           |             |             |             |
|-----------|-------------|-------------|-------------|
| C         | -2.89538300 | 0.56098300  | 1.76721300  |
| C         | -1.59509900 | 1.13406400  | 2.36530700  |
| C         | -4.06245300 | 1.55417700  | 1.93753200  |
| H         | -3.14097600 | -0.35880400 | 2.31608700  |
| C         | -1.79022900 | 1.51681700  | 3.84276000  |
| H         | -1.28483300 | 2.01684600  | 1.79206800  |
| H         | -0.78526900 | 0.40125900  | 2.27233400  |
| C         | -4.25033500 | 1.92150700  | 3.42171900  |
| H         | -3.84864100 | 2.46778800  | 1.37014800  |
| H         | -4.99288900 | 1.14176800  | 1.53916100  |
| C         | -2.96259300 | 2.48889400  | 4.03199000  |
| H         | -0.86267400 | 1.95227800  | 4.23142500  |
| H         | -1.97521000 | 0.60555700  | 4.42837400  |
| H         | -5.07084700 | 2.64150900  | 3.51406800  |
| H         | -4.55690500 | 1.02598300  | 3.97967500  |
| H         | -3.10925600 | 2.70264500  | 5.09614100  |
| H         | -2.72377700 | 3.44733000  | 3.55023700  |
| Au        | -0.35959400 | -0.85585300 | -0.27803500 |
| H         | 5.12977500  | 0.04814300  | -1.73259800 |
| H         | 4.71282200  | 1.17695900  | 1.09855700  |
| <b>46</b> |             |             |             |
| C         | -0.56383100 | 0.46602100  | 0.21613900  |
| C         | 0.50236800  | 1.52569500  | 0.10189100  |
| C         | 0.77695000  | 2.39174800  | 1.16640400  |
| C         | 1.21149400  | 1.68580800  | -1.09590200 |
| C         | 1.74322000  | 3.39174600  | 1.04268700  |
| C         | 0.22259600  | 2.28966800  | 2.09543500  |
| C         | 2.17616300  | 2.68402500  | -1.22375500 |
| H         | 1.00929800  | 1.01823200  | -1.92830300 |
| C         | 2.44636600  | 3.53950500  | -0.15336100 |
| H         | 1.94142600  | 4.05725200  | 1.87823200  |
| H         | 2.71972600  | 2.79191800  | -2.15805700 |
| H         | 3.19915000  | 4.31648600  | -0.25188300 |
| C         | -1.85227600 | 0.88617200  | -0.45129100 |
| O         | -2.09619900 | 2.02447700  | -0.79194300 |
| O         | -2.72133700 | -0.13673700 | -0.65067400 |
| C         | -3.97036400 | 0.22000800  | -1.28945000 |
| H         | -4.48215700 | 0.96547300  | -0.67291300 |
| H         | -3.74851600 | 0.68909300  | -2.25268900 |
| C         | -0.19297400 | -1.04257700 | 0.19021600  |
| C         | -0.59180500 | -0.39687300 | 1.48090300  |
| C         | -1.84665600 | -0.79849400 | 2.23364800  |
| H         | -2.14397300 | 0.01910700  | 2.91084300  |
| H         | -2.67086900 | -0.96898200 | 1.54107000  |
| O         | -1.67650700 | -2.01981700 | 2.94314100  |
| H         | -0.96219300 | -1.89812500 | 3.58198800  |
| C         | 1.17457000  | -1.56015700 | -0.11516500 |

|                           |              |             |             |
|---------------------------|--------------|-------------|-------------|
| C                         | 1.30620200   | -2.52673100 | -1.12501000 |
| C                         | 2.33411700   | -1.14954600 | 0.56075200  |
| C                         | 2.54982700   | -3.06662700 | -1.45149300 |
| H                         | 0.41864900   | -2.86241500 | -1.65568300 |
| C                         | 3.57899500   | -1.68758000 | 0.23526000  |
| H                         | 2.27379700   | -0.39740000 | 1.34061300  |
| C                         | 3.69410600   | -2.64833500 | -0.77111600 |
| H                         | 2.62269400   | -3.81596000 | -2.23481000 |
| H                         | 4.46266300   | -1.35322200 | 0.77164500  |
| H                         | 4.66479200   | -3.06695600 | -1.02064500 |
| C                         | -4.78407200  | -1.05042000 | -1.44600900 |
| H                         | -4.99976200  | -1.50428400 | -0.47434500 |
| H                         | -5.73566200  | -0.82108600 | -1.93570500 |
| H                         | -4.25151400  | -1.78411300 | -2.05802900 |
| H                         | 0.23691900   | -0.15775200 | 2.14747000  |
| H                         | -0.97910600  | -1.64064200 | -0.26051400 |
| <b>TS<sub>21-47</sub></b> |              |             |             |
| C                         | -5.62009600  | 0.56018200  | 0.47174700  |
| C                         | -4.28726300  | 0.63391900  | 0.30859500  |
| C                         | -3.36086300  | -0.32653200 | 0.96423800  |
| H                         | -3.86559300  | -0.99712100 | 1.65735200  |
| H                         | -2.53776400  | 0.18023300  | 1.49062700  |
| O                         | -2.75945500  | -1.16319600 | -0.10464800 |
| H                         | -1.55136200  | -0.70735100 | -0.27563600 |
| C                         | -6.64952900  | 1.44535300  | -0.08090800 |
| C                         | -6.35701300  | 2.55398000  | -0.89840300 |
| C                         | -7.99678000  | 1.17505100  | 0.21882000  |
| C                         | -7.37732100  | 3.35711300  | -1.39638500 |
| H                         | -5.32671500  | 2.79067600  | -1.14630000 |
| C                         | -9.01941100  | 1.97962200  | -0.28002400 |
| H                         | -8.23979800  | 0.32330600  | 0.84893000  |
| C                         | -8.71257700  | 3.07373200  | -1.08955400 |
| H                         | -7.13459600  | 4.20821700  | -2.02570700 |
| H                         | -10.05298300 | 1.75291500  | -0.03690000 |
| H                         | -9.50612100  | 3.70365600  | -1.47989100 |
| H                         | -6.00319100  | -0.24735200 | 1.09651300  |
| H                         | -3.83447200  | 1.40781700  | -0.30738700 |
| C                         | -1.40861400  | -1.92389800 | 0.20033500  |
| C                         | -1.31019700  | -2.99041900 | -0.84968500 |
| C                         | -1.74388200  | -4.29726800 | -0.56942800 |
| C                         | -0.85014100  | -2.68990500 | -2.14253700 |
| C                         | -1.69487500  | -5.28109800 | -1.55500200 |
| H                         | -2.13866700  | -4.54446700 | 0.41045500  |
| C                         | -0.81175200  | -3.67364500 | -3.12841300 |
| H                         | -0.52535300  | -1.67983700 | -2.37696600 |
| C                         | -1.22815800  | -4.97349800 | -2.83443800 |
| H                         | -2.03074300  | -6.28719500 | -1.32453000 |

|   |             |             |             |
|---|-------------|-------------|-------------|
| H | -0.45592100 | -3.42586500 | -4.12356300 |
| H | -1.19319000 | -5.74216200 | -3.60020500 |
| C | -1.40498000 | -2.46314800 | 1.62589100  |
| O | -2.41153200 | -2.71966300 | 2.24775300  |
| O | -0.15326800 | -2.67919100 | 2.05611700  |
| C | -0.00779600 | -3.33959100 | 3.35530900  |
| H | 0.96229200  | -3.83400400 | 3.28573100  |
| H | -0.79539500 | -4.08995500 | 3.44675000  |
| C | -0.05654500 | -2.33782900 | 4.49540800  |
| H | 0.71549000  | -1.57100900 | 4.38054600  |
| H | 0.12141200  | -2.85855900 | 5.44156100  |
| H | -1.03602000 | -1.85715100 | 4.55321100  |
| P | 2.32313500  | 0.89727900  | 0.05326500  |
| C | 3.79090100  | -0.31680100 | 0.29478400  |
| C | 5.15123700  | 0.31286500  | 0.64740900  |
| C | 3.90403000  | -1.30318800 | -0.88418700 |
| H | 3.45023400  | -0.88438400 | 1.17268600  |
| C | 6.19583400  | -0.78442600 | 0.92710300  |
| H | 5.50089300  | 0.94276600  | -0.17779500 |
| H | 5.06028300  | 0.95664800  | 1.52802000  |
| C | 4.95927200  | -2.38486800 | -0.59404800 |
| H | 4.18897600  | -0.75968800 | -1.79416100 |
| H | 2.93199400  | -1.77078300 | -1.08318200 |
| C | 6.32038600  | -1.76823900 | -0.24382600 |
| H | 7.16233200  | -0.31542900 | 1.14125500  |
| H | 5.90767700  | -1.33258900 | 1.83488700  |
| H | 5.04757100  | -3.04797900 | -1.46150500 |
| H | 4.61413100  | -3.00862400 | 0.24221600  |
| H | 7.04090800  | -2.55617700 | -0.00001200 |
| H | 6.71925300  | -1.24202700 | -1.12228300 |
| C | 2.30261500  | 2.08996700  | 1.55655000  |
| C | 0.86593200  | 2.55578000  | 1.86849800  |
| C | 3.25040900  | 3.30042700  | 1.43944600  |
| H | 2.64556900  | 1.45064700  | 2.38210900  |
| C | 0.82230700  | 3.42474500  | 3.13705000  |
| H | 0.47703100  | 3.13361500  | 1.01767800  |
| H | 0.20660700  | 1.68804800  | 1.98642200  |
| C | 3.20686700  | 4.15594300  | 2.71954500  |
| H | 2.94192000  | 3.92217700  | 0.58910200  |
| H | 4.27802300  | 2.98112200  | 1.24462600  |
| C | 1.78128500  | 4.61917500  | 3.04378300  |
| H | -0.20416800 | 3.76718100  | 3.30861700  |
| H | 1.09426200  | 2.80555900  | 4.00317100  |
| H | 3.87334400  | 5.01693200  | 2.59940300  |
| H | 3.60378800  | 3.56964400  | 3.55967800  |
| H | 1.77053400  | 5.18672500  | 3.98032500  |
| H | 1.43404200  | 5.30521500  | 2.25876700  |
| C | 2.43647300  | 1.94133500  | -1.55547500 |

|           |             |             |             |   |             |             |             |
|-----------|-------------|-------------|-------------|---|-------------|-------------|-------------|
| C         | 1.74499000  | 1.23954700  | -2.74223600 | H | 3.62144800  | 4.98846400  | -3.29335400 |
| C         | 3.85622400  | 2.40197600  | -1.94233500 | H | -0.14019000 | 6.08129200  | -1.51676200 |
| H         | 1.84230600  | 2.82928500  | -1.29778500 | H | 1.67384700  | 6.52580000  | -3.15789300 |
| C         | 1.71713300  | 2.15029800  | -3.98222700 | C | 2.12334600  | 2.68780100  | 1.58534200  |
| H         | 2.27969200  | 0.31121400  | -2.98292500 | O | 3.19644500  | 2.83328500  | 2.11838300  |
| H         | 0.72314000  | 0.95454700  | -2.46724000 | O | 0.92609800  | 2.91954500  | 2.14645800  |
| C         | 3.81306600  | 3.31658200  | -3.18101800 | C | 0.93723000  | 3.48110400  | 3.49793500  |
| H         | 4.47347900  | 1.52449400  | -2.16966000 | H | -0.01032800 | 4.01818800  | 3.56590500  |
| H         | 4.33951600  | 2.92642100  | -1.11378600 | H | 1.76567200  | 4.18919800  | 3.56334900  |
| C         | 3.12156100  | 2.63349700  | -4.36754800 | C | 1.05009400  | 2.39165100  | 4.54959000  |
| H         | 1.25207600  | 1.61342600  | -4.81644400 | H | 0.23527200  | 1.66690600  | 4.45648500  |
| H         | 1.07658500  | 3.01869000  | -3.77447300 | H | 0.99151900  | 2.84139700  | 5.54579200  |
| H         | 4.83424000  | 3.61061300  | -3.44706800 | H | 2.00705300  | 1.87088200  | 4.46905500  |
| H         | 3.27828200  | 4.24229300  | -2.92762800 | P | -2.46920100 | -0.87391900 | 0.07068200  |
| H         | 3.06459100  | 3.31965500  | -5.21920500 | C | -3.95279400 | 0.32599100  | 0.27077400  |
| H         | 3.72503600  | 1.77633800  | -4.69696100 | C | -5.30604600 | -0.33386300 | 0.59788100  |
| Au        | 0.32259700  | -0.47877900 | 0.07158000  | C | -4.06186300 | 1.29873400  | -0.91889200 |
| <b>47</b> |             |             |             | H | -3.63931100 | 0.90288100  | 1.15201000  |
| C         | 5.15971400  | -1.21982000 | 0.37849600  | C | -6.37692300 | 0.74477700  | 0.85224800  |
| C         | 4.05408200  | -0.75148500 | -0.22357400 | H | -5.62521300 | -0.97232900 | -0.23308600 |
| C         | 3.09632900  | 0.15840600  | 0.46444900  | H | -5.22029400 | -0.97261100 | 1.48260400  |
| H         | 3.42249000  | 0.38937800  | 1.48354800  | C | -5.14173200 | 2.36244000  | -0.65250200 |
| H         | 2.08035400  | -0.29368900 | 0.51460500  | H | -4.32379700 | 0.74264300  | -1.82795700 |
| O         | 2.95964500  | 1.37526200  | -0.29803900 | H | -3.09477400 | 1.78067800  | -1.10702100 |
| H         | 0.94055500  | 1.68098300  | 0.07534500  | C | -6.49736100 | 1.72176400  | -0.32470500 |
| C         | 6.16211600  | -2.14285900 | -0.16585600 | H | -7.33752400 | 0.25651100  | 1.04860100  |
| C         | 6.05846500  | -2.72999600 | -1.44127200 | H | -6.11731700 | 1.30057000  | 1.76375200  |
| C         | 7.28424800  | -2.45537300 | 0.62177900  | H | -5.22599000 | 3.01902800  | -1.52513300 |
| C         | 7.04566100  | -3.59122100 | -1.90872200 | H | -4.82345600 | 2.99629700  | 0.18670800  |
| H         | 5.20101500  | -2.51435000 | -2.07157900 | H | -7.23620200 | 2.49717100  | -0.09660800 |
| C         | 8.27349900  | -3.31857100 | 0.15401100  | H | -6.87065100 | 1.18571000  | -1.20836400 |
| H         | 7.37959500  | -2.01111500 | 1.60937100  | C | -2.44030400 | -2.05600500 | 1.58126100  |
| C         | 8.15750100  | -3.88921500 | -1.11381800 | C | -1.00023700 | -2.48556300 | 1.92558100  |
| H         | 6.95051200  | -4.03413500 | -2.89575000 | C | -3.35732000 | -3.28865200 | 1.44113000  |
| H         | 9.13288900  | -3.54428000 | 0.77806300  | H | -2.81821300 | -1.42129100 | 2.39455600  |
| H         | 8.92569200  | -4.56231600 | -1.48223700 | C | -0.96785000 | -3.34863900 | 3.19857700  |
| H         | 5.35948600  | -0.88302400 | 1.39641700  | H | -0.57827200 | -3.05693800 | 1.08664600  |
| H         | 3.80188500  | -1.02677700 | -1.24511000 | H | -0.36522800 | -1.60163600 | 2.05707000  |
| C         | 1.98193000  | 2.24040300  | 0.10893900  | C | -3.32406300 | -4.13746000 | 2.72650500  |
| C         | 1.88134900  | 3.43134700  | -0.82226300 | H | -3.01231400 | -3.90507700 | 0.60119500  |
| C         | 2.90374400  | 3.68240600  | -1.74521500 | H | -4.38714700 | -2.99389400 | 1.22060300  |
| C         | 0.78552900  | 4.30285300  | -0.74128300 | C | -1.89634200 | -4.56532500 | 3.08725600  |
| C         | 2.82385000  | 4.79606600  | -2.58244600 | H | 0.06206800  | -3.66621100 | 3.39421200  |
| H         | 3.75404600  | 3.01334800  | -1.79692300 | H | -1.27337400 | -2.73236200 | 4.05543700  |
| C         | 0.711171900 | 5.41133500  | -1.58207500 | H | -3.96715500 | -5.01395600 | 2.59252700  |
| H         | -0.00591600 | 4.11616400  | -0.02095300 | H | -3.75578100 | -3.55729200 | 3.55345300  |
| C         | 1.73145800  | 5.66054500  | -2.50467700 | H | -1.89589400 | -5.12781500 | 4.02677600  |
|           |             |             |             | H | -1.51403200 | -5.24701500 | 2.31496500  |



|    |             |             |             |
|----|-------------|-------------|-------------|
| C  | -2.49047900 | -1.90377100 | -1.54922900 |
| C  | -1.79742900 | -1.16949000 | -2.71500100 |
| C  | -3.88706400 | -2.40750500 | -1.96870600 |
| H  | -1.87242000 | -2.77111800 | -1.27874100 |
| C  | -1.70703900 | -2.07707400 | -3.95451500 |
| H  | -2.36140900 | -0.26218500 | -2.96727100 |
| H  | -0.79378500 | -0.84527000 | -2.41626800 |
| C  | -3.78166800 | -3.31732700 | -3.20756100 |
| H  | -4.52442800 | -1.54862500 | -2.21000800 |
| H  | -4.37352300 | -2.94909700 | -1.15312500 |
| C  | -3.08375800 | -2.60900000 | -4.37510600 |
| H  | -1.24145900 | -1.52088200 | -4.77526900 |
| H  | -1.04087900 | -2.92227800 | -3.73234300 |
| H  | -4.78617500 | -3.64329500 | -3.49843600 |
| H  | -3.22398700 | -4.22572800 | -2.94138400 |
| H  | -2.98065700 | -3.29248500 | -5.22444100 |
| H  | -3.70843900 | -1.77378500 | -4.72076300 |
| Au | -0.50239200 | 0.50021500  | 0.12591200  |

**48**

|   |             |             |             |
|---|-------------|-------------|-------------|
| C | -2.93049100 | 0.68094900  | -0.13501100 |
| C | -1.90419900 | 0.07940600  | -0.75308800 |
| C | -0.52982000 | 0.66612700  | -0.82878400 |
| H | -0.46380200 | 1.58842500  | -0.23836900 |
| H | -0.28170100 | 0.91378300  | -1.87722400 |
| O | 0.40297600  | -0.30731200 | -0.35196700 |
| H | 1.91421100  | 0.22149800  | -1.67366200 |
| C | -4.32125200 | 0.21220400  | -0.04239100 |
| C | -4.80040100 | -0.92299000 | -0.72321100 |
| C | -5.22459800 | 0.92732900  | 0.76345200  |
| C | -6.12514100 | -1.32845000 | -0.59102300 |
| H | -4.13341900 | -1.48923300 | -1.36604600 |
| C | -6.55224500 | 0.52289800  | 0.89586200  |
| H | -4.87427200 | 1.80900900  | 1.29456200  |
| C | -7.00864600 | -0.60876500 | 0.21952200  |
| H | -6.47315700 | -2.20788300 | -1.12575100 |
| H | -7.22919800 | 1.09196700  | 1.52682100  |
| H | -8.04244400 | -0.92684100 | 0.31835300  |
| H | -2.73376400 | 1.62671900  | 0.37075000  |
| H | -2.02682600 | -0.88124300 | -1.24941500 |
| C | 1.75225900  | -0.00790800 | -0.60786900 |
| C | 2.60313300  | -1.20624600 | -0.21530500 |
| C | 2.22825800  | -2.00217000 | 0.87337100  |
| C | 3.77862000  | -1.50253400 | -0.91327300 |
| C | 3.01899900  | -3.08808800 | 1.25035900  |
| H | 1.31237000  | -1.77085300 | 1.40569400  |
| C | 4.56978700  | -2.58671600 | -0.53194700 |
| H | 4.07496900  | -0.88392600 | -1.75599800 |

|   |            |             |             |
|---|------------|-------------|-------------|
| C | 4.19118500 | -3.38270400 | 0.55091700  |
| H | 2.71853100 | -3.70482100 | 2.09275200  |
| H | 5.47778500 | -2.81236800 | -1.08406200 |
| H | 4.80456300 | -4.22944400 | 0.84577600  |
| C | 2.21901900 | 1.22522600  | 0.19361500  |
| O | 1.65697400 | 1.67625100  | 1.16608800  |
| O | 3.35727700 | 1.71768300  | -0.33720900 |
| C | 3.96989700 | 2.83369000  | 0.35697200  |
| H | 5.03385600 | 2.74786500  | 0.12419900  |
| H | 3.82070200 | 2.70256300  | 1.43121900  |
| C | 3.39735500 | 4.15936700  | -0.12043600 |
| H | 3.50681300 | 4.26451300  | -1.20391200 |
| H | 3.92823400 | 4.98789500  | 0.36019000  |
| H | 2.33841500 | 4.23566000  | 0.13841500  |
